# Supplementary material for: Visible light catalyzed arylsilylation of alkenes to construct silicon-containing 1,1-diaryl moieties
Source: Royal Society of Chemistry journal article supplement (doi:10.1039/d4gc00073k), 2024-01-01
Supplement: d4gc00073k1.pdf [file d4gc00073k1.pdf]

## Supporting Information

### **Visible Light Catalyzed Arylsilylation of Alkenes to Construct Silicon-Containing 1,1-Diaryl Moieties**

Jia Cao,<sup>[a,b]</sup> Liuzhou Gao,<sup>[a]</sup> Guoqiang Wang,<sup>\*[a]</sup> Shuhua Li<sup>\*[a]</sup>

[a] Key Laboratory of Mesoscopic Chemistry of Ministry of Education, Institute of Theoretical and Computational Chemistry, School of Chemistry and Chemical Engineering, Nanjing University, Nanjing 210093, P. R. China

[b] Shaanxi Key Laboratory of Chemical Reaction Engineering, School of Chemistry and Chemical Engineering, Yan'an University, Yan'an 716000, P. R. China

Corresponding Author: shuhua@nju.edu.cn; wangguoqiang710@nju.edu.cn

---

## Table of Contents

|                                                                                           |     |
|-------------------------------------------------------------------------------------------|-----|
| 1. General Information .....                                                              | 3   |
| 2. Experimental Details for the Photoredox Catalyzed 1.2-Silylarylation of Alkenes .....  | 4   |
| 2.1 Reaction Optimization Studies .....                                                   | 4   |
| 2.2 Experimental Procedure for the Photoredox Catalyzed 1.2-Silylarylation of Alkenes.... | 4   |
| 2.3 Experimental Studies on Reaction Mechanism .....                                      | 5   |
| 2.4 Characterization Data of alkene silylarylation products .....                         | 8   |
| 3. Computational Investigations .....                                                     | 39  |
| 4. NMR Spectra .....                                                                      | 40  |
| 5. Energies and Cartesian Coordinates of the Optimized Structures.....                    | 103 |
| 6. Reference .....                                                                        | 111 |

## 1. General Information

All reactions were carried out with standard Schlenk techniques in an argon-filled glove-box. (Dimethylphenylsilyl)boronic acid pinacol ester ( $\text{PhMe}_2\text{SiBpin}_2$ ), 4-canopyridine, base, photocatalysis, substituted styrenes bearing Me, MeO,  $\text{CF}_3$ , F, CN, Cl, Br,  $\text{CO}_2\text{Me}$  group on the benzene ring as well as 1.1-diphenylethylene, 2-phenyl-1-propene, trans-stilbene, ethyl acrylate and 2-methyl-2-propenoic acid cyclohexyl ester were purchased and used without purification. Additionally, (hetero)aryl nitriles including 2-cyclopropylisonicotinonitrile, 2-tert-butylisonicotinonitrile, 2,6-dimethyl-4-cyanopyridine, 2-fluoroisonicotinonitrile, 3-methoxy-isonicotinonitrile, 4-cyano-3-methylpyridine, 4-cyano-3-fluoropyridine, 5-cyanoquinoline, 1.2-dicyanobenzene, 1.4-dicyanobenzene, 2,5-dimethylterephthalonitrile, 4-(4-cyanophenyl)benzotrile and 2,5-dichloroterephthalonitrile were also purchased and used without purification. Commercial chemicals were purchased from TCI, Acros, Sigma-Aldrich, J&K, and Alfa Aesar Chemical Companies and used as received. Anhydrous  $\text{CH}_3\text{CN}$  was purchased from J&K and used as received (water < 30 ppm, J&KSeal). Analytical thin-layer chromatography (TLC) was performed on silica gel 60  $\text{F}_{254}$  aluminum sheets from Qingdao Haiyang Chemical Co., Ltd. Flash chromatography was performed on silica gel (200–300 mesh, Qingdao Haiyang Chemical Co., Ltd). Other substituted alkenes<sup>[1]</sup> and 3-aryl substituted canopyridines<sup>[2]</sup> were prepared according to the literature. Silylboronates (1b–1f) were prepared according to the literatures.<sup>[3]</sup>

$^1\text{H}$ ,  $^{13}\text{C}$ ,  $^{11}\text{B}$  and  $^{19}\text{F}$  NMR spectra were recorded in  $\text{CDCl}_3$  on a Bruker AVANCE Avance III 400 instrument. Chemical shifts are reported in parts per million (ppm) and are referenced to the residual solvent resonance as the internal standard ( $\text{CDCl}_3$ : 7.26 ppm for  $^1\text{H}$  NMR, and 77.16 ppm for  $^{13}\text{C}\{^1\text{H}$  NMR). Data are reported as follows: chemical shift ( $\delta$  ppm), multiplicity (s = singlet, d = doublet, t = triplet, q = quartet, m = multiplet), coupling constants (Hz) and integration. Infrared spectra were recorded on a ThermoFisher Nicolet iS5 FTIR using a neat thin-film technique. High-resolution mass spectra (HRMS) were recorded on the Thermo Quest Finnigan LCQDECA system equipped with an ESI ionization source and a TOF detector mass spectrometer.

All the photochemical reactions were performed with Blue LED strip (8 W,  $\lambda = 450$  nm).

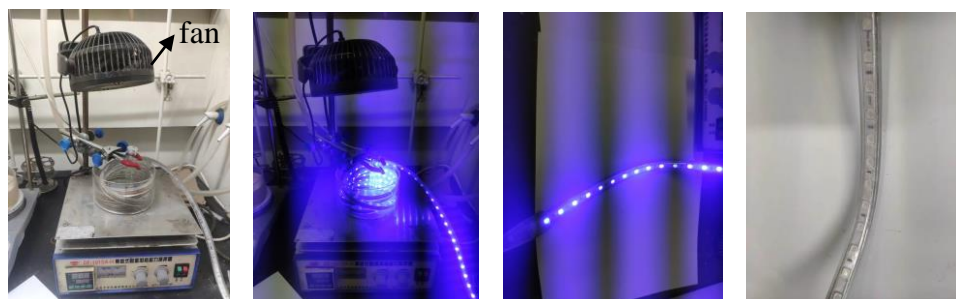

**Figure S1.** Photoreactor setup

## 2. Experimental Details for the Photoredox Catalyzed 1.2-Silylarylation of Alkenes

### 2.1 Reaction Optimization Studies

**Experimental procedure:** according to the general procedure, in an oven-dried reaction vial (10 mL) containing a magnetic stir bar was charged with 4-methylstyrene **3a** (36 mg, 0.3 mmol, 1.5 equiv.), 1,4-dicyanobenzene (0.2 mmol, 1.0 equiv.), and PhMe<sub>3</sub>SiBpin (79 mg, 0.3 mmol, 1.5 equiv.), Rb<sub>2</sub>CO<sub>3</sub> (0.2 mmol, 1.0 equiv.), Ir(ppy)<sub>3</sub> (2.6 mg, 0.004 mmol, 2 mol%) and anhydrous acetonitrile (1 mL) in an argon-filled glove box. After stirring under blue LED irradiation at room temperature for 24 h (The temperature of the reaction was maintained at room temperature *via* a fan). Then, the reaction mixture was diluted by ethyl acetate, and filtered through a plug of silica (eluting with ethyl acetate). Finally, the filtrate was concentrated under reduced pressure and the resulting crude material was purified by preparative TLC (petroleum ether/ethyl acetate) to afford the corresponding silylpyridylation of alkenes product.

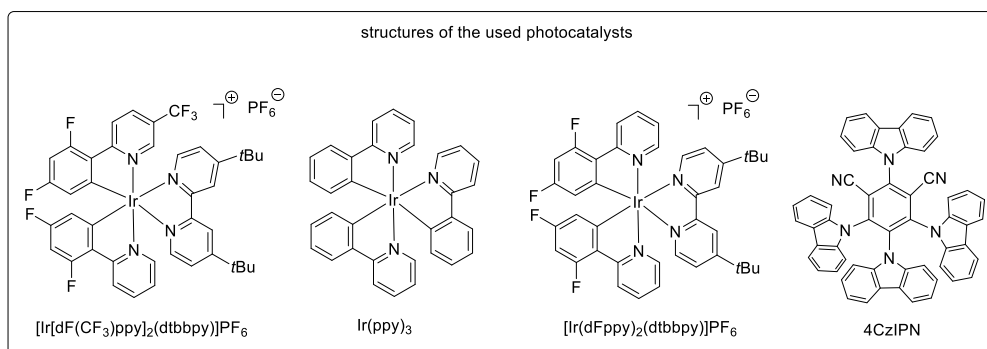

### 2.2 Experimental Procedure for the Photoredox Catalyzed 1.2-Silylarylation of Alkenes

#### 2.2.1 General procedure for the photoredox catalyzed 1.2-silylarylation of alkenes

In an oven-dried reaction vial (10 mL) containing a magnetic stir bar was charged with (hetero)aryl nitrile derivatives (0.2 mmol, 1.0 equiv.), alkene (0.3 mmol, 1.5 equiv.), PhMe<sub>2</sub>SiBpin (79 mg, 0.3 mmol, 1.5 equiv.), Rb<sub>2</sub>CO<sub>3</sub> (0.2 mmol, 1.0 equiv.), Ir(ppy)<sub>3</sub> (2.6 mg, 0.004 mmol, 2 mol%) and anhydrous acetonitrile (1 mL) in an argon-filled glove box. The vial was tightly sealed, then removed from the glovebox. After stirring under 8 W blue LED strip irradiation at room temperature for 24 h (The temperature of the reaction was maintained at room temperature *via* a fan). Upon completion, the reaction mixture was diluted by ethyl acetate, and filtered through a plug of silica (eluting with ethyl acetate). Finally, the filtrate was concentrated under reduced pressure and the resulting crude material was purified by preparative TLC (petroleum ether/ethyl acetate) to afford the corresponding silylpyridylation of alkenes product.

#### 2.2.2 Gram scale experiments

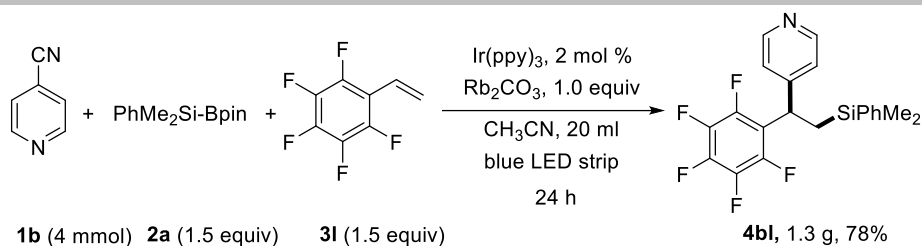

In an oven-dried reaction vial (10 mL) containing a magnetic stir bar was charged with 4-cyanopyridine (4 mmol, 1.0 equiv.), alkene (1.5 equiv.),  $\text{PhMe}_2\text{SiBpin}$  (1.5 equiv.),  $\text{Rb}_2\text{CO}_3$  (1.0 equiv.),  $\text{Ir(ppy)}_3$  (2 mol%) and anhydrous acetonitrile (20 mL) in an argon-filled glove box. The vial was tightly sealed, then removed from the glovebox. After stirring under 8 W blue LED strip irradiation at room temperature for 24 h (The temperature of the reaction was maintained at room temperature *via* a fan). Upon completion, the reaction mixture was diluted by ethyl acetate, and filtered through a plug of silica (eluting with ethyl acetate). Finally, the filtrate was concentrated under reduced pressure and the resulting crude material was purified by preparative TLC (petroleum ether/ethyl acetate) to afford the corresponding product **4bl** in 78% yield.

## 2.3 Experimental Studies on Reaction Mechanism

### 2.3.1 Radical-radical coupling experiment

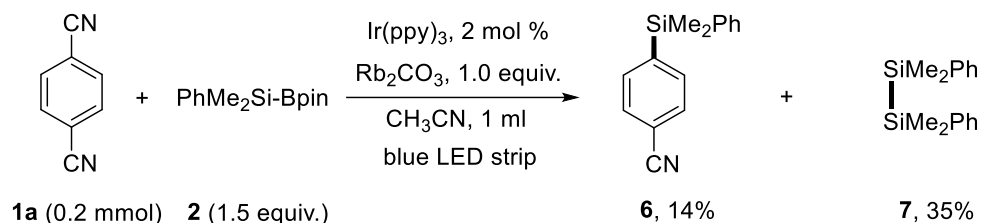

We performed the reaction of 1,4-dicyanobenzene and  $\text{PhMe}_3\text{SiBpin}$  under standard conditions. The cross-coupling product **6** between  $\text{PhMe}_2\text{Si}$  radical and (hetero)aryl nitrile radical anion as well as the product  $\text{PhMe}_2\text{Si-SiMe}_2\text{Ph}$  from dimeric  $\text{PhMe}_2\text{Si}$  radical were produced. These results indicated both the  $\text{PhMe}_2\text{Si}$  radical and (hetero)aryl nitrile radical anion was formed in the photocatalyzed process.

**Experimental procedure:** according to the general procedure, in an oven-dried reaction vial (10 mL) containing a magnetic stir bar was charged with 1,4-dicyanobenzene (0.2 mmol, 1.0 equiv.), and  $\text{PhMe}_3\text{SiBpin}$  (79 mg, 0.3 mmol, 1.5 equiv.),  $\text{Rb}_2\text{CO}_3$  (0.2 mmol, 1.0 equiv.),  $\text{Ir(ppy)}_3$  (2.6 mg, 0.004 mmol, 2 mol%) and anhydrous acetonitrile (1 mL) in an argon-filled glove box. After stirring under blue LED irradiation at room temperature for 24 h (The temperature of the reaction was maintained at room temperature *via* a fan). Upon completion, the reaction mixture was diluted by ethyl acetate, and filtered through a plug of silica (eluting with ethyl acetate). Finally, the filtrate was concentrated under reduced pressure and the resulting crude material was purified by preparative TLC (petroleum ether/ethyl

acetate) to afford the corresponding product. Compound **6** as oil (14% yield).  $^1\text{H NMR}$  (400 MHz,  $\text{CDCl}_3$ ):  $\delta$  7.63 – 7.60 (m, 4H), 7.51 – 7.47 (m, 2H), 7.42 – 7.35 (m, 3H), 0.57 (s, 6H) ppm.  $^{13}\text{C NMR}$  (100 MHz,  $\text{CDCl}_3$ )  $\delta$  145.5, 136.6, 134.7, 134.2, 131.1, 129.7, 128.2, 119.1, 112.8, -2.6 ppm. Spectra data of compound **6** are consistent with literature data.<sup>[4]</sup> Compound **7** as oil (35% yield).  $^1\text{H NMR}$  (400 MHz,  $\text{CDCl}_3$ ):  $\delta$  7.64 – 7.51 (m, 4H), 7.43 – 7.35 (m, 6H), 0.37 (s, 12H) ppm.  $^{13}\text{C NMR}$  (100 MHz,  $\text{CDCl}_3$ )  $\delta$  138.9, 132.1, 128.4, 126.8, 0.0 ppm. Spectra data of compound **7** are consistent with literature data.<sup>[5]</sup>

### 2.3.2 Radical clock experiments

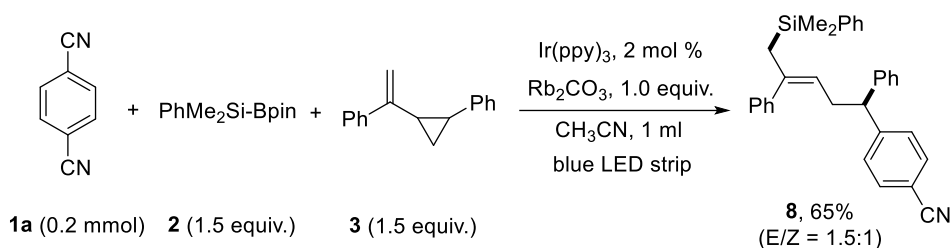

We performed a radical-clock experiment using the reaction of (1-(2-phenylcyclopropyl)-vinyl)-benzene **3**, 1,4-dicyanobenzene, and  $\text{PhMe}_3\text{SiBpin}$  with  $\text{Ir}(\text{ppy})_3$  as photocatalyst and  $\text{Rb}_2\text{CO}_3$  as a base, the corresponding ring-opening product **8** was obtained in 65% yield, which supports a radical mechanism.

**Experimental procedure:** according to the general procedure, in an oven-dried reaction vial (10 mL) containing a magnetic stir bar was charged with (1-(2-phenylcyclopropyl)-vinyl)-benzene **3**, 1,4-dicyanobenzene (0.2 mmol, 1.0 equiv.), and  $\text{PhMe}_3\text{SiBpin}$  (79 mg, 0.3 mmol, 1.5 equiv.),  $\text{Rb}_2\text{CO}_3$  (0.2 mmol, 1.0 equiv.),  $\text{Ir}(\text{ppy})_3$  (2.6 mg, 0.004 mmol, 2 mol%) and anhydrous acetonitrile (1 mL) in an argon-filled glove box. After stirring under blue LED irradiation at room temperature for 24 h (The temperature of the reaction was maintained at room temperature *via* a fan). Upon completion, the reaction mixture was diluted by ethyl acetate, and filtered through a plug of silica (eluting with ethyl acetate). Finally, the filtrate was concentrated under reduced pressure and the resulting crude material was purified by preparative TLC (petroleum ether/ethyl acetate) to afford the corresponding product **8** as colorless oil (65% yield, E/Z = 1.5:1).  $^1\text{H NMR}$  (400 MHz,  $\text{CDCl}_3$ ):  $\delta$  7.58 – 7.42 (m, 3H), 7.41 – 7.17 (m, 13H), 7.12 – 7.05 (m, 2H), 7.00 – 6.97 (m, 1H), 5.15 (td,  $J = 7.1, 2.1$  Hz, 1H), 3.98 – 3.89 (m, 1H), 2.72 – 2.68 (m, 1H), 2.67 – 2.54 (m, 1H), 2.18 (s, 1H), 2.03 (s, 1H), 0.13 – 0.07 (m, 3H), 0.06 – 0.01 (m, 3H) ppm.  $^{13}\text{C}\{^1\text{H}\}$  NMR (100 MHz,  $\text{CDCl}_3$ ):  $\delta$  150.3, 150.2, 144.3, 143.2, 143.2, 141.9, 139.9, 139.3, 139.0, 138.9, 133.7, 133.6, 132.2, 132.1, 129.1, 128.9, 128.9, 128.7, 128.6, 128.4, 128.2, 128.1, 128.0, 127.8, 127.7, 126.9, 126.7, 126.6, 123.3, 122.8, 119.1, 110.0, 109.9, 52.1, 51.2, 34.9, 34.8, 29.0, 21.1, -2.4, -2.8 ppm. IR (film): 3066, 3024, 2954, 2896, 2226, 1599, 1492, 1426, 1247, 1112, 1020, 910, 834, 697  $\text{cm}^{-1}$ . HRMS (ESI): calculated for  $\text{C}_{32}\text{H}_{32}\text{NSi}^+$   $[\text{M}+\text{H}]^+$  458.2299; found 458.2290.

### 2.3.3 TEMPO trapping experiment

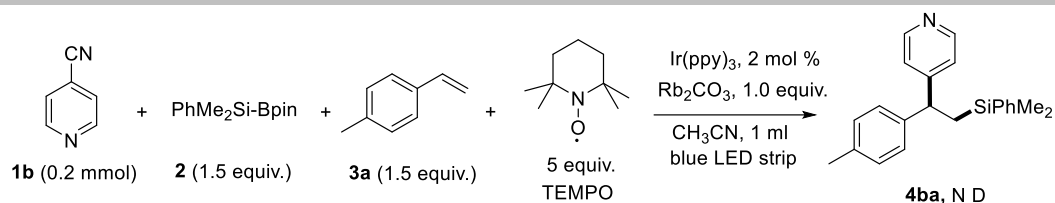

When adding the 2,2,6,6-Tetramethyl-1-piperinedinyloxy (TEMPO) into the reaction of 4-canopyridine, 4-methyl styrene and PhMe<sub>3</sub>SiBpin in presence of Ir(ppy)<sub>3</sub> and Rb<sub>2</sub>CO<sub>3</sub>, the desired product **4ba** was inhibited, suggesting a radical mechanism.

**Experimental procedure:** according to the general procedure, in an oven-dried reaction vial (10 mL) containing a magnetic stir bar was charged with 4-methylstyrene **3a** (36 mg, 0.3 mmol, 1.5 equiv.), 1,4-dicyanobenzene (0.2 mmol, 1.0 equiv.), 2,2,6,6-Tetramethyl-1-piperinedinyloxy (TEMPO, 5.0 equiv.) and PhMe<sub>3</sub>SiBpin (79 mg, 0.3 mmol, 1.5 equiv.), Rb<sub>2</sub>CO<sub>3</sub> (0.2 mmol, 1.0 equiv.), Ir(ppy)<sub>3</sub> (2.6 mg, 0.004 mmol, 2 mol%) and anhydrous acetonitrile (1 mL) in an argon-filled glove box. After stirring under blue LED irradiation at room temperature for 24 h. Then, the reaction mixture was analysis by GC-MS.

#### 2.3.4 Light on/off experiment

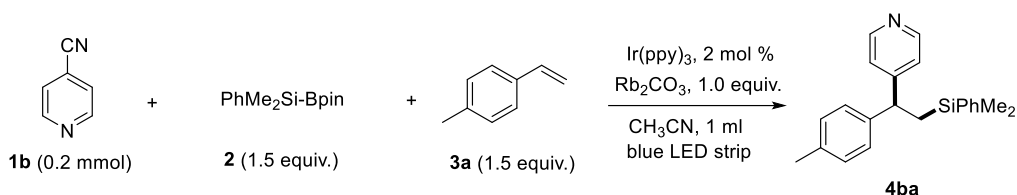

We carried out the light on/off experiments by the reaction of 4-canopyridine, 4-methylstyrene and PhMe<sub>3</sub>SiBpin under standard conditions, indicating light irradiation is essential for this protocol.

**Experimental procedure:** according to the general procedure, six oven-dried reaction vials were charged respectively 4-methylstyrene **3a** (36 mg, 0.3 mmol, 1.5 equiv.), 1,4-dicyanobenzene (0.2 mmol, 1.0 equiv.), and PhMe<sub>3</sub>SiBpin (79 mg, 0.3 mmol, 1.5 equiv.), Rb<sub>2</sub>CO<sub>3</sub> (0.2 mmol, 1.0 equiv.), Ir(ppy)<sub>3</sub> (2.6 mg, 0.004 mmol, 2 mol%) and anhydrous acetonitrile (1 mL) in an argon-filled glove box. The vials were irradiated under blue LED irradiation. After 2 hour, the lamps were turned off, and one vial was removed from the irradiation setup for analysis. The remaining five vials were stirred in the absence of light for an additional 1 hour. Then, one vial was removed for analysis, and the other lamps were turned back on to irradiate. After an additional 2 hours of irradiation, the lamps were turned off, and one vial was removed for analysis. The remaining vials were stirred in the absence of light for an additional 1 hour. Then, a vial was removed for analysis, and the other lamps were turned back on to irradiate the remaining one reaction mixture. After an additional 2 hours of irradiation, the lamps were turned off, and the last vial was removed for analysis. The reaction mixtures were diluted by ethyl acetate, and filtered through a plug of silica (eluting with ethyl acetate). Finally, the filtrate was

concentrated under reduced pressure and the resulting crude material was purified by preparative TLC (petroleum ether/ethyl acetate) to afford the corresponding product.

## 2.4 Characterization Data of alkene silylation products

### 2.4.1 4-(2-(dimethyl(phenyl)silyl)-1-(p-tolyl)ethyl)benzonitrile (**4a**)

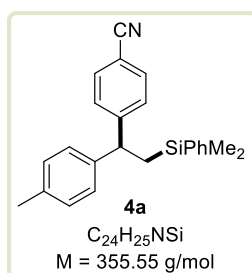

Prepared according to general procedure from 1,4-dicyanobenzene **1a** (26 mg, 0.2 mmol, 1.0 equiv.), PhMe<sub>2</sub>SiBpin (79 mg, 0.3 mmol, 1.5 equiv.), 4-methylstyrene **3a** (36 mg, 0.3 mmol, 1.5 equiv.) and anhydrous acetonitrile (1 mL) in the presence of Ir(ppy)<sub>3</sub> (2 mol%, 2.6 mg, 0.04 mmol) and Rb<sub>2</sub>CO<sub>3</sub> (0.2 mmol, 1.0 equiv.). Purification by preparative TLC (petroleum PE/EA = 20:1) to afford **4aa** as colorless oil (49 mg, 68% yield). **<sup>1</sup>H NMR** (400 MHz, CDCl<sub>3</sub>): δ 7.53 – 7.46 (m, 2H), 7.43 – 7.38 (m, 2H), 7.37 – 7.34 (m, 2H), 7.32 – 7.29 (m, 2H), 7.10 – 7.05 (m, 4H), 4.08 – 4.03 (m, 1H), 2.32 – 2.31 (m, 3H), 1.67 – 1.60 (m, 2H), 0.11 (s, 3H), 0.08 (s, 3H) ppm. **<sup>13</sup>C{<sup>1</sup>H} NMR** (100 MHz, CDCl<sub>3</sub>): δ 152.7, 142.1, 138.5, 136.3, 133.6, 132.2, 129.3, 129.0, 128.3, 127.8, 127.5, 119.1, 109.7, 47.0, 23.2, 21.0, -2.4, -2.7 ppm. **IR** (film): 3028, 2253, 2232, 1607, 1255, 1122, 903, 674 cm<sup>-1</sup>. **HRMS (ESI)**: calculated for C<sub>24</sub>H<sub>26</sub>NSi<sup>+</sup> [M+H]<sup>+</sup> 356.1829; found 356.1822.

### 2.4.2 4-(2-(dimethyl(phenyl)silyl)-1-(p-tolyl)ethyl)pyridine (**4ba**)

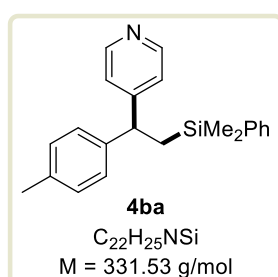

Prepared according to general procedure from 4-cyanopyridine **1b** (21 mg, 0.2 mmol, 1.0 equiv.), PhMe<sub>2</sub>SiBpin (79 mg, 0.3 mmol, 1.5 equiv.), 4-methylstyrene **3a** (36 mg, 0.3 mmol, 1.5 equiv.) and anhydrous acetonitrile (1 mL) in the presence of Ir(ppy)<sub>3</sub> (2 mol%, 2.6 mg, 0.04 mmol) and Rb<sub>2</sub>CO<sub>3</sub> (0.2 mmol, 1.0 equiv.). Purification by preparative TLC (petroleum PE/EA = 20:1) to afford **4ba** as colorless oil (69 mg, 84% yield). **<sup>1</sup>H NMR** (400 MHz, CDCl<sub>3</sub>): 8.30 (d, *J* = 5.3 Hz, 2H), 7.31 – 7.27 (m, 2H), 7.26 – 7.18 (m, 3H), 7.02 – 6.99 (m, 2H), 6.98 – 6.91 (m, 4H), 3.86 – 3.80 (m, 1H), 2.18 (s, 3H), 1.52 – 1.44



(m, 2H), 0.06 (s, 3H), 0.03 (s, 3H) ppm.  $^{13}\text{C}\{^1\text{H}\}$  NMR (100 MHz,  $\text{CDCl}_3$ ):  $\delta$  156.2, 149.7, 141.8, 138.6, 136.4, 133.6, 129.3, 129.1, 127.9, 127.6, 122.9, 46.4, 22.8, 21.1, -2.3, -2.7 ppm. IR (film): 3043, 3020, 2953, 2918, 1593, 1511, 1426, 1248, 1112, 993, 837, 700  $\text{cm}^{-1}$ . HRMS (ESI): calculated for  $\text{C}_{22}\text{H}_{26}\text{NSi}^+$   $[\text{M}+\text{H}]^+$  332.1839; found 332.1927.

#### 2.4.3 4-(2-(dimethyl(phenyl)silyl)-1-phenylethyl)pyridine (**4bb**)

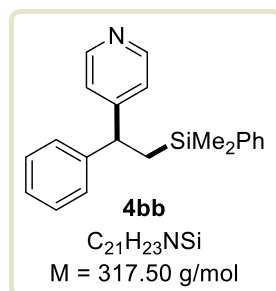

Prepared according to general procedure from 4-cyanopyridine **1b** (21 mg, 0.2 mmol, 1.0 equiv.),  $\text{PhMe}_2\text{SiBpin}$  (79 mg, 0.3 mmol, 1.5 equiv.), styrene **3b** (32 mg, 0.3 mmol, 1.5 equiv.) and anhydrous acetonitrile (1 mL) in the presence of  $\text{Ir}(\text{ppy})_3$  (2 mol%, 2.6 mg, 0.04 mmol) and  $\text{Rb}_2\text{CO}_3$  (0.2 mmol, 1.0 equiv.). Purification by preparative TLC (petroleum PE/EA = 20:1) to afford **4bb** as colorless oil (50 mg, 79% yield).  $^1\text{H}$  NMR (400 MHz,  $\text{CDCl}_3$ ):  $\delta$  8.40 (d,  $J = 5.3$  Hz, 2H), 7.41 – 7.35 (m, 2H), 7.33 – 7.30 (m, 2H), 7.25 – 7.20 (m, 2H), 7.18 – 7.13 (dm, 3H), 7.12 – 7.09 (m, 2H), 3.96 (t,  $J = 8.0$  Hz, 1H), 1.63 – 1.56 (m, 2H), 0.05 (s, 3H), 0.03 (s, 3H) ppm.  $^{13}\text{C}\{^1\text{H}\}$  NMR (100 MHz,  $\text{CDCl}_3$ ):  $\delta$  155.9, 149.7, 144.8, 138.5, 133.6, 129.1, 128.7, 127.9, 127.8, 126.8, 122.9, 46.8, 22.8, -2.3, -2.7 ppm. IR (film): 3067, 3024, 1953, 2917, 1680, 1593, 1493, 1414, 1249, 1112, 837, 733, 699  $\text{cm}^{-1}$ . HRMS (ESI): calculated for  $\text{C}_{21}\text{H}_{24}\text{NSi}^+$   $[\text{M}+\text{H}]^+$  318.1673; found 318.1667. Spectra data are consistent with literature data.<sup>[1]</sup>

#### 2.4.4 4-(2-(dimethyl(phenyl)silyl)-1-(4-methoxyphenyl)ethyl)pyridine (**4bc**)

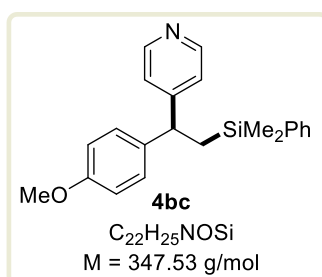

Prepared according to general procedure from 4-cyanopyridine **1b** (21 mg, 0.2 mmol, 1.0 equiv.),  $\text{PhMe}_2\text{SiBpin}$  (79 mg, 0.3 mmol, 1.5 equiv.), 4-methoxystyrene **3c** (40 mg, 0.3 mmol, 1.5 equiv.) and anhydrous acetonitrile (1 mL) in the presence of  $\text{Ir}(\text{ppy})_3$  (2 mol%, 2.6 mg, 0.04 mmol) and  $\text{Rb}_2\text{CO}_3$  (0.2 mmol, 1.0 equiv.). Purification by preparative TLC (petroleum PE/EA = 20:1) to afford **4bc** as colorless oil (54 mg, 78% yield).  $^1\text{H}$  NMR (400 MHz,  $\text{CDCl}_3$ ):  $\delta$  8.33 (d,  $J = 5.0$  Hz, 2H), 7.34 – 7.30 (m, 2H), 7.28 – 7.20 (m, 3H), 7.04 – 6.99 (m, 4H), 6.72 – 6.69 (m, 2H), 3.88 – 3.82 (n, 1H), 3.67 (s, 3H), 1.56 – 1.47

(m, 2H) ppm.  $^{13}\text{C}\{^1\text{H}\}$  NMR (100 MHz,  $\text{CDCl}_3$ ):  $\delta$  158.4, 156.3, 149.7, 138.6, 136.8, 133.5, 129.0, 128.7, 127.8, 122.8, 114.0, 55.3, 45.9, 22.9, -2.4, -2.7 ppm. IR (film): 3067, 3021, 2953, 2905, 2834, 1608, 1593, 1426, 1246, 1176, 1126, 1073, 993, 835, 731  $\text{cm}^{-1}$ . HRMS (ESI): calculated for  $\text{C}_{22}\text{H}_{26}\text{NOSi}^+$   $[\text{M}+\text{H}]^+$  348.1778; found 348.1779. Spectra data are consistent with literature data.<sup>[1,6]</sup>

#### 2.4.5 4-(2-(dimethyl(phenyl)silyl)-1-(4-fluorophenyl)ethyl)pyridine (**4bd**)

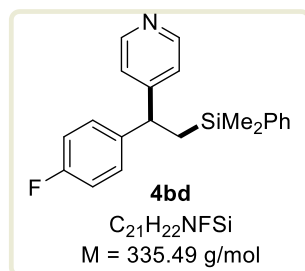

Prepared according to general procedure from 4-cyanopyridine **1b** (21 mg, 0.2 mmol, 1.0 equiv.),  $\text{PhMe}_2\text{SiBpin}$  (79 mg, 0.3 mmol, 1.5 equiv.), 4-methoxystyrene **3d** (37 mg, 0.3 mmol, 1.5 equiv.) and anhydrous acetonitrile (1 mL) in the presence of  $\text{Ir}(\text{ppy})_3$  (2 mol%, 2.6 mg, 0.04 mmol) and  $\text{Rb}_2\text{CO}_3$  (0.2 mmol, 1.0 equiv.). Purification by preparative TLC (petroleum PE/EA = 20:1) to afford **4bd** as colorless oil (54 mg, 80% yield).  $^1\text{H}$  NMR (400 MHz,  $\text{CDCl}_3$ ):  $\delta$  8.43 (d,  $J = 5.5 \text{ Hz}$ , 2H), 7.43 – 7.26 (m, 5H), 7.14 – 7.08 (m, 4H), 6.96 – 6.88 (m, 2H), 3.97 (t,  $J = 8.0 \text{ Hz}$ , 1H), 1.62 – 1.57 (m, 2H), 0.09 (s, 6H) ppm.  $^{13}\text{C}\{^1\text{H}\}$  NMR (100 MHz,  $\text{CDCl}_3$ ):  $\delta$  161.6 (d,  $J = 245.2 \text{ Hz}$ ), 155.6, 149.8, 140.4 (d,  $J = 3.3 \text{ Hz}$ ), 138.3, 133.5, 129.2, 129.1, 127.9, 122.7, 115.4 (d,  $J = 21.3 \text{ Hz}$ ), 46.0, 23.0, -2.4, -2.7 ppm.  $^{19}\text{F}$  NMR (376 MHz,  $\text{CDCl}_3$ )  $\delta$  -116.1. IR (film): 3068, 2954, 2897, 1594, 1507, 1426, 1411, 1249, 1221, 1157, 1112, 835, 813, 699  $\text{cm}^{-1}$ . HRMS (ESI): calculated for  $\text{C}_{21}\text{H}_{23}\text{NFSi}^+$   $[\text{M}+\text{H}]^+$  336.1578; found 336.1573. Spectra data are consistent with literature data.<sup>[1]</sup>

#### 2.4.6 4-(1-(4-chlorophenyl)-2-(dimethyl(phenyl)silyl)ethyl)pyridine (**4be**)

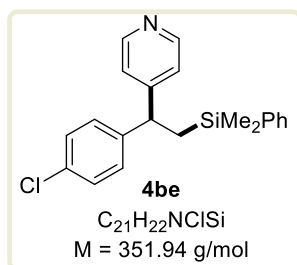

Prepared according to general procedure from 4-cyanopyridine **1b** (21 mg, 0.2 mmol, 1.0 equiv.),  $\text{PhMe}_2\text{SiBpin}$  (79 mg, 0.3 mmol, 1.5 equiv.), 4-chlorostyrene **3e** (42 mg, 0.3 mmol, 1.5 equiv.) and anhydrous acetonitrile (1 mL) in the presence of  $\text{Ir}(\text{ppy})_3$  (2 mol%, 2.6 mg, 0.04 mmol) and  $\text{Rb}_2\text{CO}_3$  (0.2 mmol, 1.0 equiv.). Purification by preparative TLC (petroleum PE/EA = 20:1) to afford **4be** as colorless oil (58 mg, 82% yield).  $^1\text{H}$  NMR (400 MHz,  $\text{CDCl}_3$ ):  $\delta$  8.45 – 8.42 (m, 2H), 7.42 – 7.29 (m, 5H), 7.24 –

7.16 (m, 2H), 7.10 – 7.07 (m, 4H), 3.95 (t,  $J = 8.0$  Hz, 1H), 1.61 – 1.56 (m, 2H), 0.09 (s, 6H) ppm.  $^{13}\text{C}\{^1\text{H}\}$  NMR (100 MHz,  $\text{CDCl}_3$ ):  $\delta$  155.3, 149.8, 143.2, 138.1, 133.5, 132.5, 129.2, 129.1, 128.7, 127.9, 122.8, 46.1, 22.8, -2.4, -2.6 ppm. IR (film): 3068, 3022, 2954, 2916, 1426, 1249, 1090, 1113, 873, 728, 699  $\text{cm}^{-1}$ . HRMS (ESI): calculated for  $\text{C}_2\text{H}_{23}\text{NCISi}^+$   $[\text{M}+\text{H}]^+$  352.1283; found 352.1280.

#### 2.4.7 4-(1-(4-bromophenyl)-2-(dimethyl(phenyl)silyl)ethyl)pyridine (**4bf**)

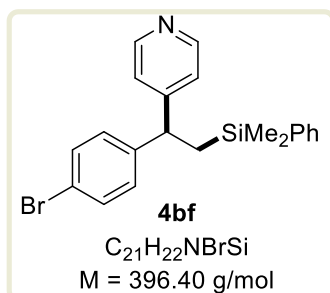

Prepared according to general procedure from 4-cyanopyridine **1b** (21 mg, 0.2 mmol, 1.0 equiv.),  $\text{PhMe}_2\text{SiBpin}$  (79 mg, 0.3 mmol, 1.5 equiv.), 4-bromostyrene **3f** (55 mg, 0.3 mmol, 1.5 equiv.) and anhydrous acetonitrile (1 mL) in the presence of  $\text{Ir}(\text{ppy})_3$  (2 mol%, 2.6 mg, 0.04 mmol) and  $\text{Rb}_2\text{CO}_3$  (0.2 mmol, 1.0 equiv.). Purification by preparative TLC (petroleum PE/EA = 20:1) to afford **4bf** as colorless oil (39 mg, 50% yield).  $^1\text{H}$  NMR (400 MHz,  $\text{CDCl}_3$ ):  $\delta$  8.45 – 8.40 (m, 2H), 7.44 – 7.26 (m, 7H), 7.11 – 7.07 (m, 2H), 7.05 – 7.00 (m, 2H), 3.93 (t,  $J = 8.0$  Hz, 1H), 1.63 – 1.53 (m, 2H), 0.09 (s, 6H) ppm.  $^{13}\text{C}\{^1\text{H}\}$  NMR (100 MHz,  $\text{CDCl}_3$ ):  $\delta$  155.2, 149.8, 143.7, 138.1, 133.5, 131.7, 129.5, 129.2, 127.9, 122.8, 120.6, 46.2, 22.7, -2.4, -2.6 ppm. IR (film): 3067, 3046, 3021, 2916, 1678, 1593, 1486, 1426, 1249, 1112, 1009, 872, 836, 700  $\text{cm}^{-1}$ . HRMS (ESI): calculated for  $\text{C}_{21}\text{H}_{23}\text{NBrSi}^+$   $[\text{M}+\text{H}]^+$  396.0778; found 396.0777.

#### 2.4.8 4-(2-(dimethyl(phenyl)silyl)-1-(4-(trifluoromethyl)phenyl)ethyl)pyridine (**4bg**)

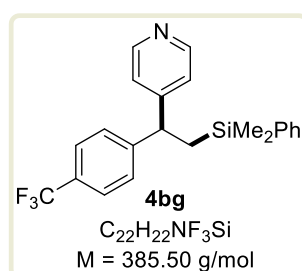

Prepared according to general procedure from 4-cyanopyridine **1b** (21 mg, 0.2 mmol, 1.0 equiv.),  $\text{PhMe}_2\text{SiBpin}$  (79 mg, 0.3 mmol, 1.5 equiv.), 4-bromostyrene **3g** (52 mg, 0.3 mmol, 1.5 equiv.) and anhydrous acetonitrile (1 mL) in the presence of  $\text{Ir}(\text{ppy})_3$  (2 mol%, 2.6 mg, 0.04 mmol) and  $\text{Rb}_2\text{CO}_3$  (0.2 mmol, 1.0 equiv.). Purification by preparative TLC (petroleum PE/EA = 20:1) to afford **4bg** as colorless oil (51 mg, 66% yield).  $^1\text{H}$  NMR (400 MHz,  $\text{CDCl}_3$ ):  $\delta$  8.44 (d,  $J = 5.2$  Hz, 2H), 7.49 – 7.45 (m, 2H), 7.39

– 7.33 (m, 3H), 7.33 – 7.29 (m, 2H), 7.27 – 7.24 (m, 2H), 7.11 – 7.08 (m, 2H), 4.02 (t,  $J = 8.0$  Hz, 1H), 1.64 – 1.59 (m, 2H), 0.10 (s, 3H), 0.09 (s, 3H) ppm.  $^{13}\text{C}\{^1\text{H}\}$  NMR (100 MHz,  $\text{CDCl}_3$ ):  $\delta$  154.7, 149.9, 148.7, 138.0, 133.5, 129.2, 128.9, 128.1, 127.9, 125.6 (q,  $J = 3.8$  Hz), 125.5, 122.8, 46.6, 22.7, -2.6, -2.6 ppm.  $^{19}\text{F}$  NMR (376 MHz,  $\text{CDCl}_3$ )  $\delta$  -62.4. IR (film): 3069, 2956, 1618, 1595, 1416, 1250, 1163, 1120, 1067, 1016, 834, 731  $\text{cm}^{-1}$ . HRMS (ESI): calculated for  $\text{C}_{22}\text{H}_{23}\text{NF}_3\text{Si}^+$   $[\text{M}+\text{H}]^+$  386.1546; found 386, 1540.

#### 2.4.9 4-(2-(dimethyl(phenyl)silyl)-1-(pyridin-4-yl)ethyl)benzonitrile (**4bh**)

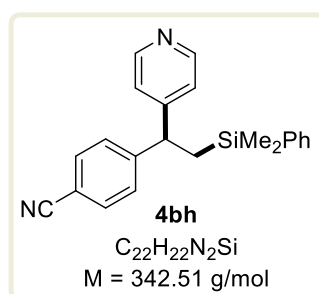

Prepared according to general procedure from 4-cyanopyridine **1b** (21 mg, 0.2 mmol, 1.0 equiv.),  $\text{PhMe}_2\text{SiBpin}$  (79 mg, 0.3 mmol, 1.5 equiv.), 4-cyanostyrene **3h** (39 mg, 0.3 mmol, 1.5 equiv.) and anhydrous acetonitrile (1 mL) in the presence of  $\text{Ir}(\text{ppy})_3$  (2 mol%, 2.6 mg, 0.04 mmol) and  $\text{Rb}_2\text{CO}_3$  (0.2 mmol, 1.0 equiv.). Purification by preparative TLC (petroleum PE/EA = 20:1) to afford **4bh** as colorless oil (34 mg, 50% yield).  $^1\text{H}$  NMR (400 MHz,  $\text{CDCl}_3$ ):  $\delta$  8.37 (d,  $J = 5.0$  Hz, 2H), 7.47 – 7.39 (m, 2H), 7.34 – 7.19 (m, 5H), 7.18 – 7.15 (m, 2H), 7.02 – 6.98 (m, 2H), 3.93 (t,  $J = 8.0$  Hz, 1H), 1.55 – 1.50 (m, 2H), 0.10 (s, 3H), 0.09 (s, 3H) ppm.  $^{13}\text{C}\{^1\text{H}\}$  NMR (100 MHz,  $\text{CDCl}_3$ ): 154.1, 150.2, 150.0, 137.7, 133.5, 132.5, 129.4, 128.5, 128.0, 122.8, 118.7, 110.7, 46.9, 22.6, -2.5, -2.5 ppm. IR (film): 3068, 3047, 2954, 2923, 2227, 2182, 2015, 1980, 1677, 1570, 1426, 1250, 1112, 904, 837, 731  $\text{cm}^{-1}$ . HRMS (ESI): calculated for  $\text{C}_{22}\text{H}_{23}\text{N}_2\text{Si}^+$   $[\text{M}+\text{H}]^+$  343.1625; found 349.1622.

#### 2.4.10 4-(2-(dimethyl(phenyl)silyl)-1-(3-methoxyphenyl)ethyl)pyridine (**4bi**)

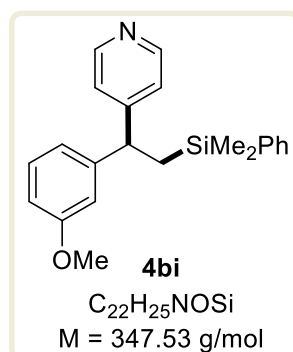

Prepared according to general procedure from 4-cyanopyridine **1b** (21 mg, 0.2 mmol, 1.0 equiv.),  $\text{PhMe}_2\text{SiBpin}$  (79 mg, 0.3 mmol, 1.5 equiv.), 3-methoxystyrene **3i** (40 mg, 0.3 mmol, 1.5 equiv.) and

anhydrous acetonitrile (1 mL) in the presence of Ir(ppy)<sub>3</sub> (2 mol%, 2.6 mg, 004 mmol) and Rb<sub>2</sub>CO<sub>3</sub> (0.2 mmol, 1.0 equiv.). Purification by preparative TLC (petroleum PE/EA = 20:1) to afford **4bi** as colorless oil (53 mg, 77% yield). <sup>1</sup>H NMR (400 MHz, CDCl<sub>3</sub>): δ 8.43 (d, *J* = 5.7 Hz, 2H), 7.46 – 7.39 (m, 2H), 7.39 – 7.30 (m, 3H), 7.21 – 7.16 (m, 1H), 7.15 – 7.12 (m, 2H), 6.81 – 6.78 (m, 1H), 6.74 – 6.71 (m, 2H), 3.95 (t, *J* = 8.0 Hz, 1H), 3.75 (s, 3H), 1.66 – 1.57 (m, 2H), 0.11 (s, 3H), 0.09 (s, 3H) ppm. <sup>13</sup>C{<sup>1</sup>H} NMR (100 MHz, CDCl<sub>3</sub>): δ 159.7, 155.6, 149.7, 146.3, 138.5, 133.5, 129.6, 129.1, 127.8, 122.9, 120.2, 113.9, 111.6, 55.2, 46.7, 22.7, -2.4, -2.7 ppm. IR (film): 3068, 2953, 2834, 1593, 1487, 1426, 1249, 1112, 1048, 993, 827, 730, 697 cm<sup>-1</sup>. HRMS (ESI): calculated for C<sub>22</sub>H<sub>26</sub>NOSi<sup>+</sup> [M+H]<sup>+</sup> 348.1778; found 348.1773.

#### 2.4.11 methyl-3-(2-(dimethyl(phenyl)silyl)-1-(pyridin-4-yl)ethyl)benzoate (**4bj**)

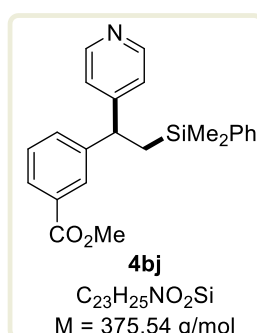

Prepared according to general procedure from 4-cyanopyridine **1b** (21 mg, 0.2 mmol, 1.0 equiv.), PhMe<sub>2</sub>SiBpin (79 mg, 0.3 mmol, 1.5 equiv.), methyl 3-vinylbenzoate **3j** (49 mg, 0.3 mmol, 1.5 equiv.) and anhydrous acetonitrile (1 mL) in the presence of Ir(ppy)<sub>3</sub> (2 mol%, 2.6 mg, 004 mmol) and Rb<sub>2</sub>CO<sub>3</sub> (0.2 mmol, 1.0 equiv.). Purification by preparative TLC (petroleum PE/EA = 20:1) to afford **4bj** as colorless oil (39 mg, 52% yield). <sup>1</sup>H NMR (400 MHz, CDCl<sub>3</sub>): δ 8.32 – 8.28 (m, 2H), 7.77 – 7.68 (m, 2H), 7.25 – 7.15 (m, 7H), 7.00 – 6.97 (m, 2H), 3.90 (t, *J* = 8.0 Hz, 1H), 3.77 (s, 3H), 1.57 – 1.45 (m, 2H), 0.05 (s, 6H) ppm. <sup>13</sup>C{<sup>1</sup>H} NMR (100 MHz, CDCl<sub>3</sub>): δ 166.9, 155.2, 149.9, 145.1, 138.1, 133.5, 132.4, 130.5, 129.1, 128.8, 128.7, 128.1, 127.9, 122.8, 52.2, 46.6, 22.7, -2.5, -2.6 ppm. IR (film): 3068, 3021, 2951, 1700, 1594, 1427, 1284, 1251, 1196, 1175, 1110, 993, 905, 834 cm<sup>-1</sup>. HRMS (ESI): calculated for C<sub>23</sub>H<sub>26</sub>NO<sub>2</sub>Si<sup>+</sup> [M+H]<sup>+</sup> 376.1727; found 376.1725.

#### 2.4.12 4-(2-(dimethyl(phenyl)silyl)-1-(2-methoxyphenyl)ethyl)pyridine (**4bk**)

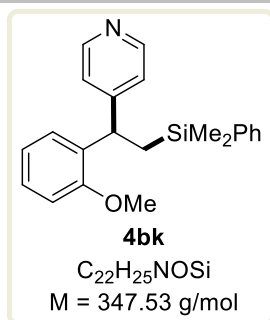

Prepared according to general procedure from 4-cyanopyridine **1b** (21 mg, 0.2 mmol, 1.0 equiv.),  $PhMe_2SiBpin$  (79 mg, 0.3 mmol, 1.5 equiv.), 2-methoxystyrene **3k** (40 mg, 0.3 mmol, 1.5 equiv.) and anhydrous acetonitrile (1 mL) in the presence of  $Ir(ppy)_3$  (2 mol%, 2.6 mg, 0.04 mmol) and  $Rb_2CO_3$  (0.2 mmol, 1.0 equiv.). Purification by preparative TLC (petroleum PE/EA = 20:1) to afford **4bk** as colorless oil (52 mg, 75% yield).  $^1H \text{ NMR}$  (400 MHz,  $CDCl_3$ ):  $\delta$  8.33 (d,  $J = 5.1 \text{ Hz}$ , 2H), 7.37 – 7.30 (m, 2H), 7.28 – 7.12 (m, 4H), 7.12 – 7.06 (m, 3H), 6.84 – 6.79 (m, 1H), 6.72 – 6.69 (m, 1H), 4.48 – 4.41 (m, 1H), 3.65 (s, 3H), 1.63 – 1.55 (m, 1H), 1.50 – 1.44 (m, 1H), 0.03 (s, 3H), 0.01 (s, 3H) ppm.  $^{13}C\{^1H\} \text{ NMR}$  (100 MHz,  $CDCl_3$ ):  $\delta$  156.6, 156.0, 149.4, 139.0, 133.5, 133.1, 128.9, 128.0, 127.7, 127.5, 123.2, 120.6, 110.7, 55.2, 38.8, 21.6, -2.5, -2.6 ppm. **IR** (film): 3068, 3022, 2953, 2836, 1973, 1593, 1489, 1413, 1242, 1111, 1029, 905, 835, 728  $cm^{-1}$ . **HRMS (ESI)**: calculated for  $C_{22}H_{26}NOSi^+$   $[M+H]^+$  348.1778; found 348.1772.

#### 2.4.13 4-(2-(dimethyl(phenyl)silyl)-1-(perfluorophenyl)ethyl)pyridine (**4bl**)

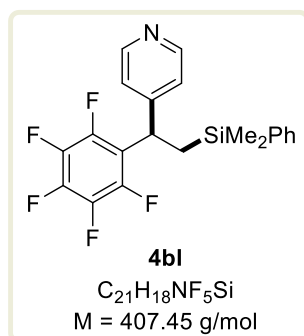

Prepared according to general procedure from 4-cyanopyridine **1b** (21 mg, 0.2 mmol, 1.0 equiv.),  $PhMe_2SiBpin$  (79 mg, 0.3 mmol, 1.5 equiv.), 1,2,3,4,5-Pentafluoro-6-vinylbenzene **3l** (58 mg, 0.3 mmol, 1.5 equiv.) and anhydrous acetonitrile (1 mL) in the presence of  $Ir(ppy)_3$  (2 mol%, 2.6 mg, 0.04 mmol) and  $Rb_2CO_3$  (0.2 mmol, 1.0 equiv.). Purification by preparative TLC (petroleum PE/EA = 20:1) to afford **4bl** as colorless oil (60 mg, 74% yield).  $^1H \text{ NMR}$  (400 MHz,  $CDCl_3$ ):  $\delta$  8.51 – 8.47 (m, 2H), 7.38 – 7.28 (m, 3H), 7.28 – 7.22 (m, 2H), 7.20 (d,  $J = 5.3 \text{ Hz}$ , 2H), 4.46 (dd,  $J = 11.8, 4.9 \text{ Hz}$ , 1H), 1.97 – 1.89 (m, 1H), 1.58 – 1.52 (m, 1H), 0.30 (s, 3H), 0.23 (s, 3H) ppm.  $^{13}C\{^1H\} \text{ NMR}$  (100 MHz,  $CDCl_3$ ):  $\delta$  152.0, 150.0, 146.2 – 145.8 (m, 1C), 143.7 – 143.3 (m, 1C), 141.4 – 140.9 (m, 1C), 138.9 – 138.4 (m, 1C), 137.1, 136.4 – 135.9 (m, 1C), 133.1, 129.1, 127.7, 122.4, 117.5 – 116.9 (m, 1C), 35.4, 18.7, -2.3, -4.2

ppm. **<sup>19</sup>F NMR** (376 MHz, CDCl<sub>3</sub>) δ -141.3 – -141.4 (m, 2F), -156.2 – -156.4 (m, 1F), -161.7 – -161.9 (m, 2F) ppm. **IR** (film): 3076, 3018, 2956, 1654, 1595, 1520, 1499, 1415, 1251, 1114, 983, 836, 717 cm<sup>-1</sup>. **HRMS (ESI)**: calculated for C<sub>21</sub>H<sub>19</sub>F<sub>5</sub>NSi<sup>+</sup> [M+H]<sup>+</sup> 408.1201; found 408.1194.

#### 2.4.14 4-(1-(4-allylphenyl)-2-(dimethyl(phenyl)silyl)ethyl)pyridine (**4bm**)

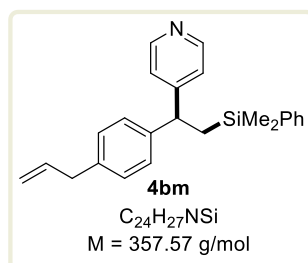

Prepared according to general procedure from 4-cyanopyridine **1b** (21 mg, 0.2 mmol, 1.0 equiv.), PhMe<sub>2</sub>SiBpin (79 mg, 0.3 mmol, 1.5 equiv.), 1-allyl-4-vinylbenzene **3m** (43 mg, 0.3 mmol, 1.5 equiv.) and anhydrous acetonitrile (1 mL) in the presence of Ir(ppy)<sub>3</sub> (2 mol%, 2.6 mg, 0.04 mmol) and Rb<sub>2</sub>CO<sub>3</sub> (0.2 mmol, 1.0 equiv.). Purification by preparative TLC (petroleum PE/EA = 20:1) to afford **4bm** as colorless oil (47 mg, 66% yield). **<sup>1</sup>H NMR** (400 MHz, CDCl<sub>3</sub>): δ 8.37 (d, *J* = 4.7 Hz, 2H), 7.37 – 7.34 (m, 2H), 7.31 – 7.25 (m, 3H), 7.09 – 7.05 (m, 4H), 7.02 (d, *J* = 8.3 Hz, 2H), 5.95 – 5.81 (m, 1H), 5.03 – 5.00 (m, 1H), 4.99 – 4.97 (m, 1H), 3.93 – 3.87 (m, 1H), 3.29 (dd, *J* = 6.6, 1.6 Hz, 2H), 1.63 – 1.49 (m, 2H), 0.30 (s, 3H), 0.23 (s, 3H) ppm. **<sup>13</sup>C{<sup>1</sup>H} NMR** (100 MHz, CDCl<sub>3</sub>): δ 156.0, 149.7, 142.6, 138.6, 138.5, 137.4, 133.6, 129.1, 128.9, 127.9, 127.8, 122.9, 115.8, 46.4, 39.8, 22.9, -2.4, -2.7 ppm. **IR** (film): 3068, 3021, 2953, 2901, 2215, 2040, 1975, 1679, 1557, 1426, 1413, 1248, 1112, 993, 837, 730 cm<sup>-1</sup>. **HRMS (ESI)**: calculated for C<sub>24</sub>H<sub>28</sub>NSi<sup>+</sup> [M+H]<sup>+</sup> 358.1986; found 358.1983.

#### 2.4.15 4-(1-(benzofuran-5-yl)-2-(dimethyl(phenyl)silyl)ethyl)pyridine (**4bn**)

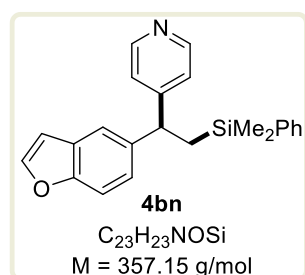

Prepared according to general procedure from 4-cyanopyridine **1b** (21 mg, 0.2 mmol, 1.0 equiv.), PhMe<sub>2</sub>SiBpin (79 mg, 0.3 mmol, 1.5 equiv.), 5-vinylbenzofuran **3n** (43 mg, 0.3 mmol, 1.5 equiv.) and anhydrous acetonitrile (1 mL) in the presence of Ir(ppy)<sub>3</sub> (2 mol%, 2.6 mg, 0.04 mmol) and Rb<sub>2</sub>CO<sub>3</sub> (0.2 mmol, 1.0 equiv.). Purification by preparative TLC (petroleum PE/EA = 20:1) to afford **4bn** as colorless oil (52 mg, 73% yield). **<sup>1</sup>H NMR** (400 MHz, CDCl<sub>3</sub>): δ 8.37 – 8.28 (m, 2H), 7.48 (d, *J* = 2.2 Hz, 1H), 7.31 – 7.27 (m, 3H), 7.26 – 7.17 (m, 4H), 7.05 (d, *J* = 5.0 Hz, 2H), 7.00 – 6.96 (m, 1H), 6.59 – 6.56 (m, 1H),

4.02 – 3.98 (m, 1H), 1.63 – 1.50 (m, 2H), -0.02 (s, 3H), -0.04 (s, 3H) ppm.  $^{13}\text{C}\{^1\text{H}\}$  NMR (100 MHz,  $\text{CDCl}_3$ ):  $\delta$  156.2, 153.9, 149.7, 145.5, 139.4, 138.5, 133.5, 129.1, 127.8, 127.6, 124.3, 122.9, 120.0, 111.4, 106.6, 46.6, 23.2, -2.4, -2.7 ppm. IR (film): 3068, 3020, 2953, 2897, 2161, 1594, 1465, 1426, 1414, 1248, 1196, 1110, 1031, 885, 810, 700  $\text{cm}^{-1}$ . HRMS (ESI): calculated for  $\text{C}_{23}\text{H}_{24}\text{NOSi}^+$   $[\text{M}+\text{H}]^+$  358.1622; found 358.1619.

#### 2.4.16 4-(1-(dimethyl(phenyl)silyl)-2-phenylpropan-2-yl)pyridine (**4bo**)

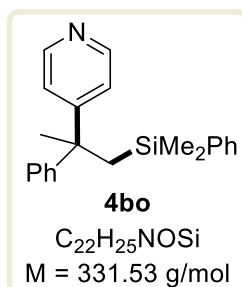

Prepared according to general procedure from 4-cyanopyridine **1b** (21 mg, 0.2 mmol, 1.0 equiv.),  $\text{PhMe}_2\text{SiBpin}$  (79 mg, 0.3 mmol, 1.5 equiv.), 2-Phenyl-1-propene **3o** (36 mg, 0.3 mmol, 1.5 equiv.) and anhydrous acetonitrile (1 mL) in the presence of  $\text{Ir}(\text{ppy})_3$  (2 mol%, 2.6 mg, 0.04 mmol) and  $\text{Rb}_2\text{CO}_3$  (0.2 mmol, 1.0 equiv.). Purification by preparative TLC (petroleum PE/EA = 20:1) to afford **4bo** as colorless oil (39 mg, 59% yield).  $^1\text{H}$  NMR (400 MHz,  $\text{CDCl}_3$ ):  $\delta$  8.43 (d,  $J$  = 5.8 Hz, 2H), 7.42 – 7.38 (m, 2H), 7.37 – 7.29 (m, 3H), 7.28 – 7.24 (m, 2H), 7.21 – 7.16 (m, 3H), 7.13 – 7.10 (m, 2H), 1.88 – 1.77 (m, 2H), 1.58 (s, 3H), 0.03 (s, 3H), 0.02 (s, 3H) ppm.  $^{13}\text{C}\{^1\text{H}\}$  NMR (100 MHz,  $\text{CDCl}_3$ ):  $\delta$  160.8, 149.5, 149.1, 139.7, 133.5, 128.9, 128.2, 127.8, 127.2, 126.3, 122.3, 45.3, 30.6, 29.7, -1.4, -1.5 ppm. IR (film): 3058, 3022, 2966, 2896, 1591, 1549, 1493, 1409, 1248, 1111, 906, 821, 727  $\text{cm}^{-1}$ . HRMS (ESI): calculated for  $\text{C}_{23}\text{H}_{24}\text{NOSi}^+$   $[\text{M}+\text{H}]^+$  332.1829; found 332.1826.

#### 2.4.17 methyl 4-(1-(dimethyl(phenyl)silyl)-2-(pyridin-4-yl)propan-2-yl)benzoate (**4bp**)

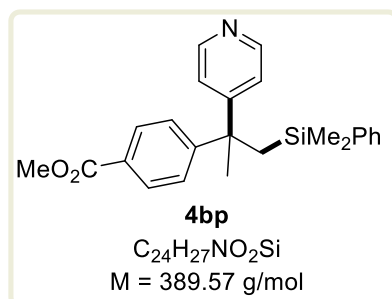

Prepared according to general procedure from 4-cyanopyridine **1b** (21 mg, 0.2 mmol, 1.0 equiv.),  $\text{PhMe}_2\text{SiBpin}$  (79 mg, 0.3 mmol, 1.5 equiv.), 5-vinylbenzofuran **3p** (53 mg, 0.3 mmol, 1.5 equiv.) and anhydrous acetonitrile (1 mL) in the presence of  $\text{Ir}(\text{ppy})_3$  (2 mol%, 2.6 mg, 0.04 mmol) and  $\text{Rb}_2\text{CO}_3$  (0.2 mmol, 1.0 equiv.). Purification by preparative TLC (petroleum PE/EA = 20:1) to afford **4bp** as colorless



oil (53 mg, 68% yield). **<sup>1</sup>H NMR** (400 MHz, CDCl<sub>3</sub>): δ 8.41 (d, *J* = 4.9 Hz, 2H), 7.91 – 7.87 (m, 2H), 7.35 – 7.32 (m, 2H), 7.31 – 7.24 (m, 3H), 7.22 – 7.20 (m, 2H), 7.07 – 7.04 (m, 2H), 3.89 (s, 3H), 1.82 – 1.78 (m, 2H), 1.56 (s, 3H) 0.00 (s, 3H), 0.02 (s, 3H) ppm. **<sup>13</sup>C{<sup>1</sup>H} NMR** (100 MHz, CDCl<sub>3</sub>): δ 166.9, 159.9, 154.3, 149.6, 139.2, 133.4, 129.5, 129.0, 128.2, 127.9, 127.2, 122.2, 52.1, 45.6, 30.5, 29.5, -1.4, -1.4. **IR** (film): 3068, 2952, 2362, 1700, 1592, 1434, 1408, 1281, 1190, 1112, 1016, 830, 775, 710 cm<sup>-1</sup>. **HRMS (ESI)**: calculated for C<sub>24</sub>H<sub>28</sub>NO<sub>2</sub>Si<sup>+</sup> [M+H]<sup>+</sup> 390.1884; found 390.1881. Spectra data are consistent with literature data.<sup>[1]</sup>

#### 2.4.18 methyl 4-(1-(dimethyl(phenyl)silyl)-2-(pyridin-4-yl)propan-2-yl)benzoate (**4bq**)

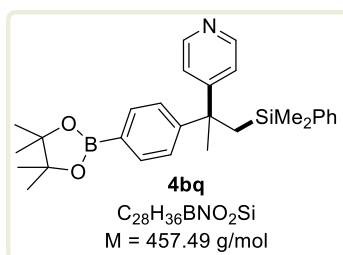

Prepared according to general procedure from 4-cyanopyridine **1b** (21 mg, 0.2 mmol, 1.0 equiv.), PhMe<sub>2</sub>SiBpin (79 mg, 0.3 mmol, 1.5 equiv.), 4,4,5,5-tetramethyl-2-(4-(prop-1-en-2-yl)phenyl)-1,3,2-dioxaborolane **3q** (73 mg, 0.3 mmol, 1.5 equiv.) and anhydrous acetonitrile (1 mL) in the presence of Ir(ppy)<sub>3</sub> (2 mol%, 2.6 mg, 0.04 mmol) and Rb<sub>2</sub>CO<sub>3</sub> (0.2 mmol, 1.0 equiv.). Purification by preparative TLC (petroleum PE/EA = 20:1) to afford **4bq** as colorless oil (73 mg, 80% yield). **<sup>1</sup>H NMR** (400 MHz, CDCl<sub>3</sub>): δ 8.45 – 8.30 (m, 2H), 7.66 (d, *J* = 8.3 Hz, 2H), 7.37 – 7.32 (m, 2H), 7.32 – 7.21 (m, 3H), 7.16 – 7.13 (m, 2H), 7.08 – 7.02 (m, 2H), 1.84 – 1.74 (m, 2H), 1.54 (s, 3H), 1.32 (s, 12H), 0.01 (s, 3H), -0.05 (s, 3H) ppm. **<sup>13</sup>C{<sup>1</sup>H} NMR** (100 MHz, CDCl<sub>3</sub>): δ 162.6, 152.2, 149.5, 139.7, 134.7, 133.5, 128.9, 128.5, 127.8, 126.6, 122.3, 83.9, 45.6, 30.5, 29.6, 25.0, -1.35, -1.43. **<sup>11</sup>B NMR** (128 MHz, CDCl<sub>3</sub>) δ 31.8. **IR** (film): 3074, 3022, 2976, 1610, 1592, 1550, 1399, 1300, 1249, 1144, 1093, 1018, 962, 831, 730 cm<sup>-1</sup>. **HRMS (ESI)**: calculated for C<sub>28</sub>H<sub>36</sub>NBO<sub>2</sub>Si<sup>+</sup> [M+H]<sup>+</sup> 458.2681; found 458.2676. Spectra data are consistent with literature data.<sup>[1]</sup>

#### 2.4.19 4-(2-(2,3-dihydrobenzo[b][1,4]dioxin-6-yl)-1-(dimethyl(phenyl)silyl)propan-2-yl)pyridine (**4br**)

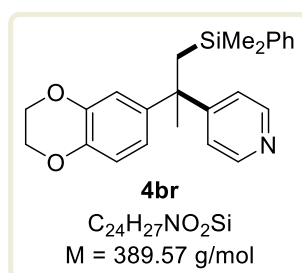

Prepared according to general procedure from 4-cyanopyridine **1b** (21 mg, 0.2 mmol, 1.0 equiv.), PhMe<sub>2</sub>SiBpin (79 mg, 0.3 mmol, 1.5 equiv.), 6-(prop-1-en-2-yl)-2,3-dihydrobenzo[b][1,4]dioxine **3u** (53 mg, 0.3 mmol, 1.5 equiv.) and anhydrous acetonitrile (1 mL) in the presence of Ir(ppy)<sub>3</sub> (2 mol%, 2.6 mg, 0.04 mmol) and Rb<sub>2</sub>CO<sub>3</sub> (0.2 mmol, 1.0 equiv.). Purification by preparative TLC (petroleum PE/EA = 20:1) to afford **4br** as colorless oil (58 mg, 75% yield). <sup>1</sup>H NMR (400 MHz, CDCl<sub>3</sub>): δ 8.41 (d, *J* = 5.0 Hz, 2H), 7.40 – 7.34 (m, 2H), 7.34 – 7.24 (m, 3H), 7.12 – 7.09 (m, 2H), 6.73 – 6.65 (m, 2H), 6.62 – 6.57 (m, 1H), 4.23 – 4.19 (m, 4H), 1.76 – 1.73 (m, 2H), 1.53 (s, 3H), -0.05 (s, 3H), 0.02 (s, 3H) ppm. <sup>13</sup>C{<sup>1</sup>H} NMR (100 MHz, CDCl<sub>3</sub>): δ 160.8, 149.4, 143.0, 142.6, 141.8, 139.7, 133.5, 128.8, 127.8, 122.2, 120.2, 116.8, 116.2, 64.5, 64.4, 44.7, 30.8, 29.8, -1.3 ppm. IR (film): 3068, 2972, 2876, 2362, 2115, 1592, 1500, 1410, 1287, 1250, 1070, 904, 837 cm<sup>-1</sup>. HRMS (ESI): calculated for C<sub>24</sub>H<sub>28</sub>NO<sub>2</sub>Si<sup>+</sup> [M+H]<sup>+</sup> 390.1884; found 390.1880. Spectra data are consistent with literature data.<sup>[1]</sup>

#### 2.4.20 2-(1-(dimethyl(phenyl)silyl)-2-(pyridin-4-yl)propan-2-yl)-9-ethyl-9H-carbazole (**4bs**)

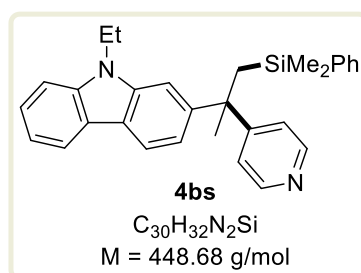

Prepared according to general procedure from 4-cyanopyridine **1b** (21 mg, 0.2 mmol, 1.0 equiv.), PhMe<sub>2</sub>SiBpin (79 mg, 0.3 mmol, 1.5 equiv.), 9-ethyl-2-(prop-1-en-2-yl)-9H-carbazole **3v** (70 mg, 0.3 mmol, 1.5 equiv.) and anhydrous acetonitrile (1 mL) in the presence of Ir(ppy)<sub>3</sub> (2 mol%, 2.6 mg, 0.04 mmol) and Rb<sub>2</sub>CO<sub>3</sub> (0.2 mmol, 1.0 equiv.). Purification by preparative TLC (petroleum PE/EA = 20:1) to afford **4bs** as colorless oil (61 mg, 68% yield). <sup>1</sup>H NMR (400 MHz, CDCl<sub>3</sub>): δ 8.39 (d, *J* = 5.7 Hz, 2H), 8.04 (d, *J* = 7.7 Hz, 1H), 7.96 – 7.93 (m, 1H), 7.44 – 7.33 (m, 4H), 7.27 – 7.17 (m, 5H), 7.16 – 7.08 (m, 3H), 4.33 – 4.25 (m, 2H), 1.98 – 1.85 (m, 2H), 1.67 (s, 3H), 1.42 – 1.35 (m, 3H), -0.05 (s, 6H) ppm. <sup>13</sup>C{<sup>1</sup>H} NMR (100 MHz, CDCl<sub>3</sub>): δ 161.9, 149.4, 140.3, 139.8, 139.4, 138.5, 133.5, 128.8, 127.7, 125.9, 125.6, 123.0, 122.4, 122.3, 120.3, 118.8, 118.3, 108.6, 108.2, 45.3, 37.6, 31.3, 30.3, 13.9, -1.3, -1.4 ppm. IR (film): 3067, 3020, 2972, 2932, 2893, 1677, 1594, 1490, 1346, 1248, 1111, 906, 831, 730 cm<sup>-1</sup>. HRMS (ESI): calculated for C<sub>30</sub>H<sub>33</sub>N<sub>2</sub>Si<sup>+</sup> [M+H]<sup>+</sup> 449.2408; found 449.2403. Spectra data are consistent with literature data.<sup>[1]</sup>

#### 2.4.21 4-(2-(benzo[b]thiophen-2-yl)-1-(dimethyl(phenyl)silyl)propan-2-yl)pyridine (**4bt**)

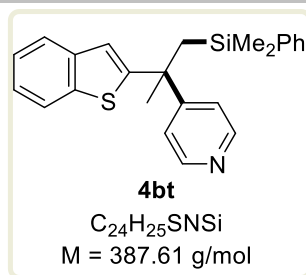

Prepared according to general procedure from 4-cyanopyridine **1b** (21 mg, 0.2 mmol, 1.0 equiv.),  $PhMe_2SiBpin$  (79 mg, 0.3 mmol, 1.5 equiv.), 2-(prop-1-en-2-yl)benzo[b]thiophene **3w** (52 mg, 0.3 mmol, 1.5 equiv.) and anhydrous acetonitrile (1 mL) in the presence of  $Ir(ppy)_3$  (2 mol%, 2.6 mg, 0.04 mmol) and  $Rb_2CO_3$  (0.2 mmol, 1.0 equiv.). Purification by preparative TLC (petroleum PE/EA = 20:1) to afford **4bt** as colorless oil (38 mg, 50% yield).  $^1H \text{ NMR}$  (400 MHz,  $CDCl_3$ ):  $\delta$  8.46 (s, 2H), 7.83 – 7.77 (m, 1H), 7.36 – 7.28 (m, 7H), 7.22 – 7.19 (m, 2H), 7.08 – 7.05 (m, 1H), 7.02 – 6.97 (m, 1H), 2.15 – 2.04 (s, 1H), 1.91 – 1.82 (s, 1H), 1.63 (s, 3H), -0.07 (s, 3H), -0.15 (s, 3H) ppm.  $^{13}C\{^1H\} \text{ NMR}$  (100 MHz,  $CDCl_3$ ):  $\delta$  159.7, 149.8, 142.8, 141.3, 139.2, 137.5, 133.5, 129.0, 127.8, 124.4, 123.9, 123.6, 123.1, 122.4, 121.6, 43.9, 31.4, 28.6, -1.9, -2.2 ppm. **IR** (film): 3068, 2965, 2109, 2014, 1594, 1426, 1248, 1112, 900, 835  $cm^{-1}$ . **HRMS (ESI)**: calculated for  $C_{24}H_{26}SNSi^+ [M+H]^+$  388.1550; found 388.1547. Spectra data are consistent with literature data.<sup>[1]</sup>

#### 2.4.22 4-(4-(1-(dimethyl(phenyl)silyl)-2-(pyridin-4-yl)propan-2-yl)phenyl)morpholine (**4bu**)

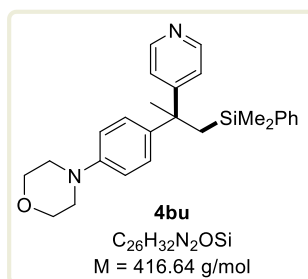

Prepared according to general procedure from 4-cyanopyridine **1b** (21 mg, 0.2 mmol, 1.0 equiv.),  $PhMe_2SiBpin$  (79 mg, 0.3 mmol, 1.5 equiv.), and 4-(4-(prop-1-en-2-yl)phenyl)morpholine **3u** (61 mg, 0.3 mmol, 1.5 equiv.) and anhydrous acetonitrile (1 mL) in the presence of  $Ir(ppy)_3$  (2 mol%, 2.6 mg, 0.04 mmol) and  $Rb_2CO_3$  (0.2 mmol, 1.0 equiv.). Purification by preparative TLC (petroleum PE/EA = 20:1) to afford **4bu** as colorless oil (51 mg, 62% yield).  $^1H \text{ NMR}$  (400 MHz,  $CDCl_3$ ): 8.42 – 8.34 (m, 2H), 7.38 – 7.32 (m, 2H), 7.32 – 7.22 (m, 3H), 7.08 (d,  $J = 5.9 \text{ Hz}$ , 2H), 7.04 – 7.01 (m, 2H), 6.77 – 6.73 (m, 2H), 3.84 – 3.81 (m, 4H), 3.12 – 3.09 (m, 4H), 1.80 – 1.71 (m, 2H), 1.52 (s, 3H), 0.01 (s, 3H), -0.03 (s, 3H) ppm.  $^{13}C\{^1H\} \text{ NMR}$  (100 MHz,  $CDCl_3$ ):  $\delta$  161.2, 149.5, 149.4, 140.4, 139.9, 133.5, 128.9, 127.9, 127.8, 122.3, 115.2, 67.0, 49.3, 44.6, 30.7, 29.8, -1.35 ppm. **IR** (film): 3068, 2963, 2891, 2820, 2362, 2185, 2040, 1592, 1513, 1232, 1121, 930, 827, 750  $cm^{-1}$ . **HRMS (ESI)**: calculated for  $C_{26}H_{33}ON_2Si^+ [M+H]^+$  417.2357; found 417.2353. Spectra data are consistent with literature data.<sup>[1]</sup>

#### 2.4.23 4-(2-(4-chlorophenyl)-1-(dimethyl(phenyl)silyl)butan-2-yl)pyridine (**4bv**)

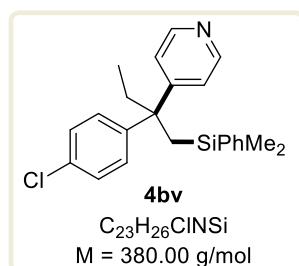

Prepared according to general procedure from 4-cyanopyridine **1b** (21 mg, 0.2 mmol, 1.0 equiv.),  $PhMe_2SiBpin$  (79 mg, 0.3 mmol, 1.5 equiv.), 1-(but-1-en-2-yl)-4-chlorobenzene **3v** (50 mg, 0.3 mmol, 1.5 equiv.) and anhydrous acetonitrile (1 mL) in the presence of  $Ir(ppy)_3$  (2 mol%, 2.6 mg, 0.04 mmol) and  $Rb_2CO_3$  (0.2 mmol, 1.0 equiv.). Purification by preparative TLC (petroleum PE/EA = 20:1) to afford **4bv** as colorless oil (59 mg, 78% yield).  $^1H \text{ NMR}$  (400 MHz,  $CDCl_3$ ):  $\delta$  8.33 (d,  $J = 5.7 \text{ Hz}$ , 2H), 7.32 – 7.14 (m, 5H), 7.12 – 6.99 (m, 2H), 6.96 – 6.92 (m, 4H), 1.93 (q,  $J = 7.3 \text{ Hz}$ , 2H), 1.62 (d,  $J = 10.0 \text{ Hz}$ , 2H), 0.45 (t,  $J = 7.3 \text{ Hz}$ , 3H), -0.10 (s, 3H), -0.11 (s, 3H) ppm.  $^{13}C\{^1H\} \text{ NMR}$  (100 MHz,  $CDCl_3$ ):  $\delta$  159.0, 149.4, 147.1, 139.1, 133.4, 132.07, 129.1, 129.0, 128.1, 127.8, 123.0, 48.6, 31.9, 26.2, 8.7, -1.7 ppm. **IR** (film): 3068, 3021, 2967, 2881, 1594, 1489, 1426, 1406, 1249, 1111, 1012, 930, 800, 700  $cm^{-1}$ . **HRMS (ESI)**: calculated for  $C_{23}H_{27}NCISi^+$   $[M+H]^+$  380.1596; found 380.1594.

#### 2.4.24 4-(1-cyclobutyl-2-(dimethyl(phenyl)silyl)-1-phenylethyl)pyridine (**4bw**)

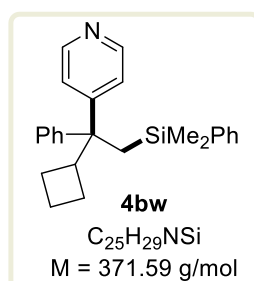

Prepared according to general procedure from 4-cyanopyridine **1b** (21 mg, 0.2 mmol, 1.0 equiv.),  $PhMe_2SiBpin$  (79 mg, 0.3 mmol, 1.5 equiv.), and 1-(but-1-en-2-yl)-4-chlorobenzene **3w** (47 mg, 0.3 mmol, 1.5 equiv.) and anhydrous acetonitrile (1 mL) in the presence of  $Ir(ppy)_3$  (2 mol%, 2.6 mg, 0.04 mmol) and  $Rb_2CO_3$  (0.2 mmol, 1.0 equiv.). Purification by preparative TLC (petroleum PE/EA = 20:1) to afford **4bw** as colorless oil (57 mg, 78% yield).  $^1H \text{ NMR}$  (400 MHz,  $CDCl_3$ ):  $\delta$  8.45 (d,  $J = 4.8 \text{ Hz}$ , 2H), 7.46 – 7.36 (m, 2H), 7.37 – 7.28 (m, 3H), 7.28 – 7.16 (m, 3H), 7.10 – 7.02 (m, 4H), 3.19 – 3.10 (m, 1H), 1.92 – 1.78 (m, 2H), 1.77 – 1.62 (m, 2H), 1.59 – 1.44 (m, 2H), 1.44 – 1.07 (m, 2H), -0.04 (s, 3H), -0.09 (s, 3H) ppm.  $^{13}C\{^1H\} \text{ NMR}$  (100 MHz,  $CDCl_3$ ):  $\delta$  157.6, 148.9, 146.8, 139.9, 133.4, 129.0, 128.9, 127.8, 127.8, 126.4, 124.7, 51.61, 42.21, 27.48, 24.84, 24.53, 17.48, -1.73, -1.87 ppm. **IR** (film): 3076, 3021,

2976, 2866, 1593, 1444, 1407, 1250, 1112, 1072, 997, 904, 842, 729  $\text{cm}^{-1}$ . **HRMS (ESI)**: calculated for  $\text{C}_{25}\text{H}_{30}\text{NSi}^+$   $[\text{M}+\text{H}]^+$  372.2142; found 372.2139.

#### 2.4.25 4-(2-(dimethyl(phenyl)silyl)-1,1-diphenylethyl)pyridine (**4bx**)

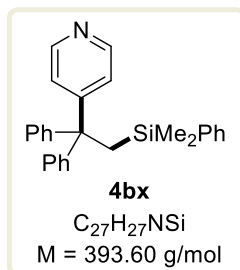

Prepared according to general procedure from 4-cyanopyridine **1b** (21 mg, 0.2 mmol, 1.0 equiv.),  $\text{PhMe}_2\text{SiBpin}$  (79 mg, 0.3 mmol, 1.5 equiv.), and 1,1-Diphenylethylene **3x** (54 mg, 0.3 mmol, 1.5 equiv.) and anhydrous acetonitrile (1 mL) in the presence of  $\text{Ir}(\text{ppy})_3$  (2 mol%, 2.6 mg, 0.04 mmol) and  $\text{Rb}_2\text{CO}_3$  (0.2 mmol, 1.0 equiv.). Purification by preparative TLC (petroleum PE/EA = 20:1) to afford **4bx** as colorless oil (51 mg, 65% yield).  **$^1\text{H NMR}$**  (400 MHz,  $\text{CDCl}_3$ ):  $\delta$  8.49 (d,  $J = 5.2 \text{ Hz}$ , 2H), 7.49 – 7.44 (m, 2H), 7.42 – 7.35 (m, 3H), 7.34 – 7.29 (m, 8H), 7.29 – 7.24 (m, 4H), 2.42 – 2.38 (m, 2H), -0.03 (s, 6H) ppm.  **$^{13}\text{C}\{^1\text{H}\} \text{NMR}$**  (100 MHz,  $\text{CDCl}_3$ ):  $\delta$  158.2, 149.3, 147.0, 140.2, 133.4, 129.1, 128.9, 128.0, 12.87, 126.5, 124.1, 55.5, 30.9, -1.3 ppm. **IR** (film): 3054, 3021, 2954, 2924, 1948, 1600, 1492, 1426, 1249, 1111, 821, 699  $\text{cm}^{-1}$ . **HRMS (ESI)**: calculated for  $\text{C}_{27}\text{H}_{28}\text{NSi}^+$   $[\text{M}+\text{H}]^+$  394.1986; found 394.1980.

#### 2.4.26 4-(2-(dimethyl(phenyl)silyl)-1-phenylpropyl)pyridine (**4by**)

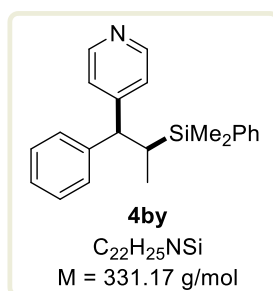

Prepared according to general procedure from 4-cyanopyridine **1b** (21 mg, 0.2 mmol, 1.0 equiv.),  $\text{PhMe}_2\text{SiBpin}$  (79 mg, 0.3 mmol, 1.5 equiv.),  $\beta$ -methylstyrene **3y** (36 mg, 0.3 mmol, 1.5 equiv.) and anhydrous acetonitrile (1 mL) in the presence of  $\text{Ir}(\text{ppy})_3$  (2 mol%, 2.6 mg, 0.04 mmol) and  $\text{Rb}_2\text{CO}_3$  (0.2 mmol, 1.0 equiv.). Purification by preparative TLC (petroleum PE/EA = 20:1) to afford **4by** as colorless oil (23 mg, 35% yield, d. r. = 1:1).  **$^1\text{H NMR}$**  (400 MHz,  $\text{CDCl}_3$ ):  $\delta$  8.48 (d,  $J = 4.6 \text{ Hz}$ , 2H), 7.47 – 7.40 (m, 2H), 7.40 – 7.30 (m, 3H), 7.28 – 7.24 (m, 3H), 7.24 – 7.20 (m, 3H), 7.20 – 7.14 (m, 1H), 3.71 (s, 0.5H), 3.68 (s, 0.5H), 2.03 – 1.97 (m, 1H), 0.90 – 0.85 (m, 3H), 0.08 (s, 3H), 0.02 (s, 3H) ppm.  **$^{13}\text{C}\{^1\text{H}\} \text{NMR}$**  (100 MHz,  $\text{CDCl}_3$ ):  $\delta$  154.2, 149.9, 143.6, 138.3, 134.0, 128.9, 128.7, 128.3, 127.7, 127.0, 123.4,

55.3, 24.0, 14.9, -2.7, -4.2 ppm. **IR** (film): 3067, 3024, 2954, 2870, 1594, 1493, 1415, 1249, 1111, 903, 834, 734  $\text{cm}^{-1}$ . **HRMS (ESI)**: calculated for  $\text{C}_{22}\text{H}_{26}\text{NSi}^+$   $[\text{M}+\text{H}]^+$  332.1829; found 332.1826.

#### 2.4.27 ethyl-3-(dimethyl(phenyl)silyl)-2-(pyridin-4-yl)propanoate (**4bz**)

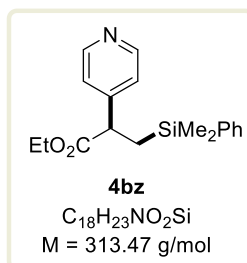

Prepared according to general procedure from 4-cyanopyridine **1b** (21 mg, 0.2 mmol, 1.0 equiv.),  $\text{PhMe}_2\text{SiBpin}$  (79 mg, 0.3 mmol, 1.5 equiv.), ethyl acrylate (30 mg, 0.3 mmol, 1.5 equiv.) and anhydrous acetonitrile (1 mL) in the presence of  $\text{Ir}(\text{ppy})_3$  (2 mol%, 2.6 mg, 0.04 mmol) and  $\text{Rb}_2\text{CO}_3$  (0.2 mmol, 1.0 equiv.). Purification by preparative TLC (petroleum PE/EA = 20:1) to afford **4bz** as colorless oil (23 mg, 36% yield).  **$^1\text{H NMR}$**  (400 MHz,  $\text{CDCl}_3$ ):  $\delta$  8.39 – 8.24 (m, 2H), 7.27 – 7.24 (m, 2H), 7.19 – 7.14 (m, 3H), 7.01 – 6.99 (m, 2H), 3.85 – 3.75 (m, 2H), 3.41 – 3.35 (m, 1H), 1.54 – 1.49 (m, 1H), 1.11 (s, 1H), 0.99 – 0.94 (m, 3H), 0.04 (s, 3H), 0.02 (s, 3H) ppm.  **$^{13}\text{C}\{^1\text{H}\} \text{NMR}$**  (100 MHz,  $\text{CDCl}_3$ ):  $\delta$  173.5, 150.1, 149.9, 137.7, 133.7, 129.3, 128.0, 123.2, 61.3, 47.0, 20.4, 14.0, -2.6, -2.7 ppm. **IR** (film): 3069, 3052, 1700, 1597, 1426, 1250, 1175, 1113, 1030, 905, 838, 730  $\text{cm}^{-1}$ . **HRMS (ESI)**: calculated for  $\text{C}_{18}\text{H}_{24}\text{NO}_2\text{Si}^+$   $[\text{M}+\text{H}]^+$  314.1571; found 314.1568.

#### 2.4.28 cyclohexyl 3-(dimethyl(phenyl)silyl)-2-methyl-2-(pyridin-4-yl)propanoate (**4baa**)

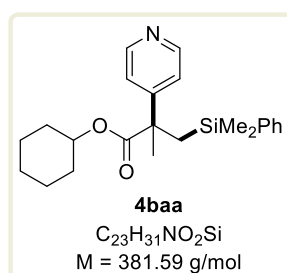

Prepared according to general procedure from 4-cyanopyridine **1b** (21 mg, 0.2 mmol, 1.0 equiv.),  $\text{PhMe}_2\text{SiBpin}$  (79 mg, 0.3 mmol, 1.5 equiv.), cyclohexyl methacrylate **3aa** (50 mg, 0.3 mmol, 1.5 equiv.) and anhydrous acetonitrile (1 mL) in the presence of  $\text{Ir}(\text{ppy})_3$  (2 mol%, 2.6 mg, 0.04 mmol) and  $\text{Rb}_2\text{CO}_3$  (0.2 mmol, 1.0 equiv.). Purification by preparative TLC (petroleum PE/EA = 20:1) to afford **4baa** as colorless oil (40 mg, 53% yield).  **$^1\text{H NMR}$**  (400 MHz,  $\text{CDCl}_3$ ):  $\delta$  8.33 – 8.21 (m, 2H), 7.27 – 7.22 (m, 2H), 7.17 – 7.08 (m, 3H), 7.03 (d,  $J = 6.0 \text{ Hz}$ , 2H), 4.51 – 4.43 (m, 1H), 1.53 – 1.42 (m, 2H), 1.39 – 1.29 (m, 6H), 1.27 – 1.22 (m, 1H), 1.15 – 1.04 (m, 5H), 1.02 – 0.94 (m, 1H), 0.04 (s, 3H), 0.00 (s, 3H) ppm.  **$^{13}\text{C}\{^1\text{H}\} \text{NMR}$**  (100 MHz,  $\text{CDCl}_3$ ):  $\delta$  174.9, 154.9, 149.7, 139.2, 133.6, 129.1, 127.9, 121.2, 73.4, 48.8,

31.1, 27.5, 25.3, 24.9, 23.4, -1.3, -1.3 ppm. **IR** (film): 2937, 2859, 1722, 1593, 1250, 1210, 1112, 905, 837  $\text{cm}^{-1}$ . **HRMS (ESI)**: calculated for  $\text{C}_{23}\text{H}_{32}\text{NO}_2\text{Si}^+$   $[\text{M}+\text{H}]^+$  382.2197; found 382.2193.

#### 2.4.29 4-(2-(cyclohex-1-en-1-yl)-1-(dimethyl(phenyl)silyl)propan-2-yl)benzonitrile (**4bab**)

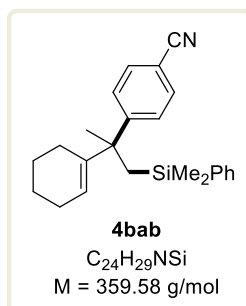

Prepared according to general procedure from 1,4-dicyanobenzene (0.2 mmol, 1.0 equiv.), PhMe<sub>2</sub>SiBpin (79 mg, 0.3 mmol, 1.5 equiv.), 1-(prop-1-en-2-yl)cyclohex-1-ene (37 mg, 0.3 mmol, 1.5 equiv.) and anhydrous acetonitrile (1 mL) in the presence of Ir(ppy)<sub>3</sub> (2 mol%, 2.6 mg, 0.04 mmol) and Rb<sub>2</sub>CO<sub>3</sub> (0.2 mmol, 1.0 equiv.). Purification by preparative TLC (petroleum PE/EA = 20:1) to afford **4bab** as colorless oil (40 mg, 53% yield). **<sup>1</sup>H NMR** (400 MHz, CDCl<sub>3</sub>):  $\delta$  7.36 – 7.29 (m, 2H), 7.28 – 7.20 (m, 2H), 7.19 – 7.07 (m, 5H), 5.61 – 5.57 (m, 1H), 1.95 – 1.88 (m, 2H), 1.42 – 1.19 (m, 8H), 1.14 (s, 3H) ppm. **<sup>13</sup>C{<sup>1</sup>H} NMR** (100 MHz, CDCl<sub>3</sub>):  $\delta$  156.0, 143.4, 140.0, 133.5, 131.8, 128.8, 127.8, 127.2, 121.4, 119.3, 109.3, 46.8, 27.9, 27.8, 25.8, 25.5, 23.0, 22.2 ppm. **HRMS (ESI)**: calculated for  $\text{C}_{24}\text{H}_{30}\text{NSi}^+$   $[\text{M}+\text{H}]^+$  360.2142; found 360.2131.

#### 2.4.30 4-(4-(dimethyl(phenyl)silyl)-3-methyl-1-phenylbut-2-en-1-yl)benzonitrile (**4bac**)

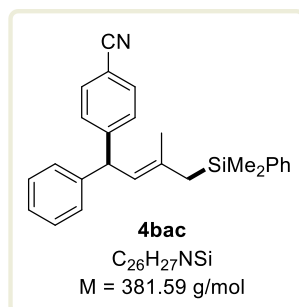

Prepared according to general procedure from 1,4-dicyanobenzene (0.2 mmol, 1.0 equiv.), PhMe<sub>2</sub>SiBpin (79 mg, 0.3 mmol, 1.5 equiv.), 1-(prop-1-en-2-yl)cyclohex-1-ene (37 mg, 0.3 mmol, 1.5 equiv.) and anhydrous acetonitrile (1 mL) in the presence of Ir(ppy)<sub>3</sub> (2 mol%, 2.6 mg, 0.04 mmol) and Rb<sub>2</sub>CO<sub>3</sub> (0.2 mmol, 1.0 equiv.). Purification by preparative TLC (petroleum PE/EA = 20:1) to afford **4bac** as colorless oil (**E**, 34 mg, 45% yield). **<sup>1</sup>H NMR** (400 MHz, CDCl<sub>3</sub>):  $\delta$  7.27 – 7.24 (m, 2H), 7.21 – 7.16 (m, 2H), 7.11 – 6.94 (m, 6H), 6.90 – 6.87 (m, 2H), 6.81 – 6.77 (m, 2H), 5.07 (d,  $J$  = 9.4 Hz, 1H), 4.59 (d,  $J$  = 9.3 Hz, 1H), 1.57 – 1.54 (m, 2H), 1.33 (d,  $J$  = 1.4 Hz, 3H) ppm. NOE difference

measurement: When the chemical shift of olefin proton was identified at  $\delta$  5.09 ppm, NOE was observed at the methylene ( $-\text{CH}_2-\text{SiMe}_2\text{Ph}$ ) proton resonances at  $\delta$  1.55 ppm, whereas no NOE appeared at the methyl proton resonance at  $\delta$  1.33 ppm. Irradiation at the methyl proton resonance at  $\delta$  1.33 ppm caused enhancement of the benzyl  $[-\text{CH}(\text{Ph})(4\text{-CNPh})]$ ,  $\delta$  4.59 ppm] and the olefin ( $\delta$  5.16) proton resonances, while no NOE was observed at the olefin proton resonance at 5.09 ppm.  **$^{13}\text{C}\{^1\text{H}\}$  NMR** (100 MHz,  $\text{CDCl}_3$ ):  $\delta$  151.1, 144.0, 138.6, 135.1, 133.7, 132.2, 129.1, 129.0, 128.6, 128.2, 127.8, 126.5, 124.6, 119.2, 109.7, 49.8, 29.6, 19.2, -2.3, -2.5 ppm. **HRMS (ESI)**: calculated for  $\text{C}_{26}\text{H}_{27}\text{NSiNa}^+$   $[\text{M}+\text{Na}]^+$  404.1805; found 404.1795.

#### 2.4.31 2-cyclopropyl-4-(2-(dimethyl(phenyl)silyl)-1-(p-tolyl)ethyl)pyridine (**5a**)

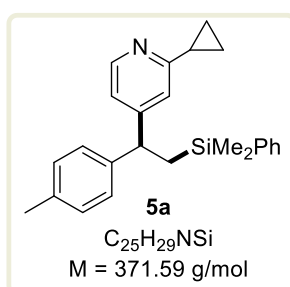

Prepared according to general procedure from 2-cyclopropyl-4-cyanopyridine **1ba** (29 mg, 0.2 mmol, 1.0 equiv.),  $\text{PhMe}_2\text{SiBpin}$  (79 mg, 0.3 mmol, 1.5 equiv.), 4-methylstyrene **3a** (36 mg, 0.3 mmol, 1.5 equiv.) and anhydrous acetonitrile (1 mL) in the presence of  $\text{Ir}(\text{ppy})_3$  (2 mol%, 2.6 mg, 0.04 mmol) and  $\text{Rb}_2\text{CO}_3$  (0.2 mmol, 1.0 equiv.). Purification by preparative TLC (petroleum PE/EA = 20:1) to afford **5a** as colorless oil (48 mg, 65% yield).  **$^1\text{H}$  NMR** (400 MHz,  $\text{CDCl}_3$ ):  $\delta$  8.12 (d,  $J = 5.1 \text{ Hz}$ , 1H), 7.31 – 7.26 (m, 2H), 7.25 – 7.12 (m, 3H), 6.98 – 6.92 (m, 4H), 6.84 (d,  $J = 1.7 \text{ Hz}$ , 1H), 6.76 (dd,  $J = 5.2, 1.7 \text{ Hz}$ , 1H), 3.79 (t,  $J = 7.9 \text{ Hz}$ , 1H), 1.84 – 1.76 (m, 1H), 1.52 – 1.45 (m, 2H), 0.87 – 0.77 (m, 4H), -0.03 (s, 3H), -0.05 (s, 3H) ppm.  **$^{13}\text{C}\{^1\text{H}\}$  NMR** (100 MHz,  $\text{CDCl}_3$ ):  $\delta$  162.7, 155.8, 149.2, 142.1, 138.8, 136.2, 133.6, 129.3, 129.0, 127.8, 127.6, 120.6, 119.8, 46.4, 22.8, 21.1, 17.2, 9.8, 9.7, -2.3, -2.7 ppm. **IR** (film): 3007, 2953, 2918, 1598, 1512, 1478, 1426, 1249, 1113, 900, 836  $\text{cm}^{-1}$ . **HRMS (ESI)**: calculated for  $\text{C}_{25}\text{H}_{30}\text{NSi}^+$   $[\text{M}+\text{H}]^+$  372.2142; found 372.2136.

#### 2.4.32 2-(tert-butyl)-4-(2-(dimethyl(phenyl)silyl)-1-(p-tolyl)ethyl)pyridine (**5b**)

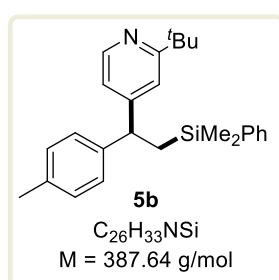



Prepared according to general procedure from 2-tert-butylisonicotinonitrile **1bb** (32 mg, 0.2 mmol, 1.0 equiv.), PhMe<sub>2</sub>SiBpin (79 mg, 0.3 mmol, 1.5 equiv.), 4-methylstyrene **3a** (36 mg, 0.3 mmol, 1.5 equiv.) and anhydrous acetonitrile (1 mL) in the presence of Ir(ppy)<sub>3</sub> (2 mol%, 2.6 mg, 0.04 mmol) and Rb<sub>2</sub>CO<sub>3</sub> (0.2 mmol, 1.0 equiv.). Purification by preparative TLC (petroleum PE/EA = 20:1) to afford **5b** as colorless oil (38 mg, 49% yield). <sup>1</sup>H NMR (400 MHz, CDCl<sub>3</sub>): δ 8.25 (d, *J* = 5.1 Hz, 1H), 7.30 – 7.26 (m, 2H), 7.25 – 7.17 (m, 3H), 7.06 (s, 1H), 7.00 – 6.97 (m, 2H), 6.95 – 6.91 (m, 2H), 6.82 – 6.79 (m, 1H), 3.81 (t, *J* = 8.0 Hz, 1H), 2.18 (s, 3H), 1.52 – 1.44 (m, 2H), 1.21 (s, 9H), -0.04 (s, 3H), -0.07 (s, 3H) ppm. <sup>13</sup>C{<sup>1</sup>H} NMR (100 MHz, CDCl<sub>3</sub>): δ 169.29, 155.9, 148.6, 142.3, 138.7, 136.1, 133.6, 129.3, 129.0, 127.8, 127.5, 120.0, 118.3, 46.8, 37.4, 30.3, 23.1, 21.0, -2.4, -2.5 ppm. IR (film): 3028, 2961, 2253, 1599, 1251, 1114, 902, 722, 649 cm<sup>-1</sup>. HRMS (ESI): calculated for C<sub>26</sub>H<sub>34</sub>NSi<sup>+</sup> [M+H]<sup>+</sup> 388.2455; found 388.2449.

#### 2.4.33 4-(2-(dimethyl(phenyl)silyl)-1-(p-tolyl)ethyl)-2,6-dimethylpyridine (**5c**)

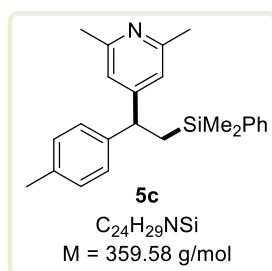

Prepared according to general procedure from 2,6-dimethyl-4-cyanopyridine **1bc** (27 mg, 0.2 mmol, 1.0 equiv.), PhMe<sub>2</sub>SiBpin (79 mg, 0.3 mmol, 1.5 equiv.), 4-methylstyrene **3a** (36 mg, 0.3 mmol, 1.5 equiv.) and anhydrous acetonitrile (1 mL) in the presence of Ir(ppy)<sub>3</sub> (2 mol%, 2.6 mg, 0.04 mmol) and Rb<sub>2</sub>CO<sub>3</sub> (0.2 mmol, 1.0 equiv.). Purification by preparative TLC (petroleum PE/EA = 20:1) to afford **5c** as colorless oil (35 mg, 46% yield). <sup>1</sup>H NMR (400 MHz, CDCl<sub>3</sub>): δ 7.40 – 7.37 (m, 2H), 7.36 – 7.29 (m, 3H), 7.09 – 7.04 (m, 4H), 6.77 (s, 2H), 3.86 (t, *J* = 8.0 Hz, 1H), 2.41 (s, 6H), 2.29 (s, 3H), 1.62 – 1.50 (m, 2H), 0.08 (s, 3H), 0.05 (s, 3H) ppm. <sup>13</sup>C{<sup>1</sup>H} NMR (100 MHz, CDCl<sub>3</sub>): δ 157.6, 156.5, 142.2, 138.8, 136.2, 133.6, 129.3, 129.0, 127.8, 127.6, 119.5, 46.3, 24.5, 22.8, 21.1, -2.2, -2.7 ppm. IR (film): 3070, 3019, 2954, 2919, 2203, 2172, 1602, 1566, 1426, 1249, 1112, 907, 843, 731 cm<sup>-1</sup>. HRMS (ESI): calculated for C<sub>24</sub>H<sub>30</sub>NSi<sup>+</sup> [M+H]<sup>+</sup> 360.2142; found 360.2136.

#### 2.4.34 4-(2-(dimethyl(phenyl)silyl)-1-(p-tolyl)ethyl)-2-fluoropyridine (**5d**)

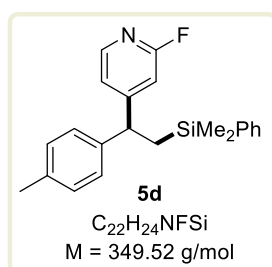

Prepared according to general procedure from 4-cyano-2-fluoropyridine **1bd** (25 mg, 0.2 mmol, 1.0 equiv.), PhMe<sub>2</sub>SiBpin (79 mg, 0.3 mmol, 1.5 equiv.), and 4-methylstyrene **3a** (36 mg, 0.3 mmol, 1.5 equiv.) in the presence of Ir(ppy)<sub>3</sub> (2 mol%, 2.6 mg, 0.04 mmol) and Rb<sub>2</sub>CO<sub>3</sub> (0.2 mmol, 1.0 equiv.). Purification by preparative TLC (petroleum PE/EA = 20:1) to afford **5d** as colorless oil (32 mg, 45% yield). **<sup>1</sup>H NMR** (400 MHz, CDCl<sub>3</sub>): δ 7.92 (d, *J* = 5.3 Hz, 1H), 7.33 – 7.30 (m, 2H), 7.29 – 7.23 (m, 3H), 6.98 (t, *J* = 1.1 Hz, 4H), 6.92 – 6.89 (m, 1H), 6.67 (s, 1H), 3.89 (dd, *J* = 9.1, 6.8 Hz, 1H), 2.22 (s, 3H), 1.57 – 1.47 (m, 2H) ppm. **<sup>13</sup>C{<sup>1</sup>H} NMR** (100 MHz, CDCl<sub>3</sub>): δ 164.1 (d, *J*<sub>C-F</sub> = 238.4 Hz), 162.4 (d, *J* = 7.3 Hz), 147.4 (d, *J*<sub>C-F</sub> = 15.3 Hz), 141.0, 138.3, 136.7, 133.6, 129.5, 129.1, 127.9, 127.6, 120.7 (d, *J*<sub>C-F</sub> = 3.9 Hz), 108.1 (d, *J*<sub>C-F</sub> = 37.2 Hz), 46.3, 22.8, 21.1, -2.3, -2.8 ppm. **<sup>19</sup>F NMR** (376 MHz, CDCl<sub>3</sub>) δ -68.6 ppm. **IR** (film): 3070, 3020, 2953, 2921, 1595, 1512, 1410, 1249, 1112, 838, 731. **HRMS (ESI)**: calculated for C<sub>22</sub>H<sub>25</sub>FNSi<sup>+</sup> [M+H]<sup>+</sup> 350.1735; found 350.1732.

#### 2.4.35 4-(2-(dimethyl(phenyl)silyl)-1-(p-tolyl)ethyl)-3-methoxypyridine (**5e**)

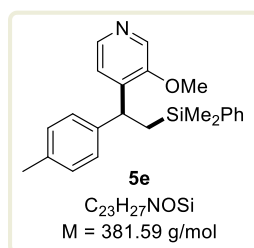

Prepared according to general procedure from 3-methoxy-isonicotinonitrile **1be** (27 mg, 0.2 mmol, 1.0 equiv.), PhMe<sub>2</sub>SiBpin (79 mg, 0.3 mmol, 1.5 equiv.), 4-methylstyrene **3a** (36 mg, 0.3 mmol, 1.5 equiv.) and anhydrous acetonitrile (1 mL) in the presence of Ir(ppy)<sub>3</sub> (2 mol%, 2.6 mg, 0.04 mmol) and Rb<sub>2</sub>CO<sub>3</sub> (0.2 mmol, 1.0 equiv.). Purification by preparative TLC (petroleum PE/EA = 20:1) to afford **5e** as colorless oil (55 mg, 73% yield). **<sup>1</sup>H NMR** (400 MHz, CDCl<sub>3</sub>): δ 8.04 – 7.99 (m, 2H), 7.35 – 7.28 (m, 2H), 7.27 – 7.15 (m, 3H), 7.06 – 7.03 (m, 3H), 6.95 (d, *J* = 7.8 Hz, 2H), 4.41 (t, *J* = 7.9 Hz, 1H), 3.73 (s, 3H), 2.20 (s, 3H), 1.47 (d, *J* = 8.0 Hz, 2H), 0.02 (s, 3H), -0.02 (s, 3H) ppm. **<sup>13</sup>C{<sup>1</sup>H} NMR** (100 MHz, CDCl<sub>3</sub>): δ 152.8, 144.0, 142.7, 141.6, 139.0, 135.9, 133.5, 133.1, 129.0, 128.8, 127.9, 127.7, 122.1, 55.9, 38.2, 22.1, 21.0, -2.3, -2.8 ppm. **IR** (film): 3067, 3019, 2953, 2921, 1972, 1588, 1511, 1494, 1415, 1293, 1112, 1025, 830, 731, 700 cm<sup>-1</sup>. **HRMS (ESI)**: calculated for C<sub>23</sub>H<sub>28</sub>NOSi<sup>+</sup> [M+H]<sup>+</sup> 362.1935; found 362.1933.

#### 2.4.36 4-(2-(dimethyl(phenyl)silyl)-1-(p-tolyl)ethyl)-3-methylpyridine (**5f**)

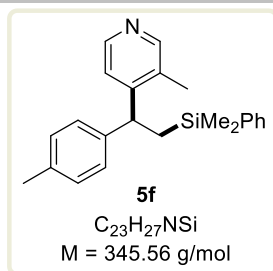

Prepared according to general procedure from 4-cyano-3-methylpyridine **1bf** (36 mg, 0.2 mmol, 1.0 equiv.),  $PhMe_2SiBpin$  (79 mg, 0.3 mmol, 1.5 equiv.), 4-methylstyrene **3a** (36 mg, 0.3 mmol, 1.5 equiv.) and anhydrous acetonitrile (1 mL) in the presence of  $Ir(ppy)_3$  (2 mol%, 2.6 mg, 0.04 mmol) and  $Rb_2CO_3$  (0.2 mmol, 1.0 equiv.). Purification by preparative TLC (petroleum PE/EA = 20:1) to afford **5f** as colorless oil (49 mg, 71% yield).  **$^1H$  NMR** (400 MHz,  $CDCl_3$ ):  $\delta$  8.31 (d,  $J = 5.3$  Hz, 1H), 8.19 (s, 1H), 7.36 – 7.32 (m, 2H), 7.31 – 7.25 (m, 3H), 7.23 (d,  $J = 4.8$  Hz, 1H), 6.98 (s, 4H), 4.08 (t,  $J = 7.8$  Hz, 1H), 2.23 (s, 3H), 2.04 (s, 3H), 1.59 – 1.46 (m, 2H), 0.06 (s, 3H), 0.02 (s, 3H). ppm.  **$^{13}C\{^1H\}$  NMR** (100 MHz,  $CDCl_3$ ):  $\delta$  153.5, 151.0, 147.7, 141.2, 138.6, 136.1, 134.0, 133.6, 131.1, 129.2, 129.1, 127.8, 121.5, 42.0, 23.6, 21.0, 16.5, -2.2, -2.5 ppm. **IR** (film): 3046, 3019, 2952, 2922, 1590, 1511, 1426, 1248, 1112, 904, 831, 700  $cm^{-1}$ . **HRMS (ESI)**: calculated for  $C_{23}H_{28}NSi^+$   $[M+H]^+$  346.1986; found 346.1981.

#### 2.4.37 4-(2-(dimethyl(phenyl)silyl)-1-(p-tolyl)ethyl)-3-fluoropyridine (**5g**)

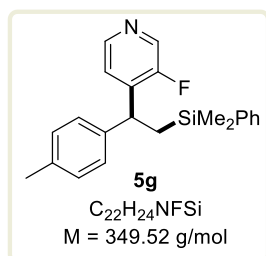

Prepared according to general procedure from 4-cyano-3-fluoropyridine **1bg** (25 mg, 0.2 mmol, 1.0 equiv.),  $PhMe_2SiBpin$  (79 mg, 0.3 mmol, 1.5 equiv.), 4-methylstyrene **3a** (36 mg, 0.3 mmol, 1.5 equiv.) and anhydrous acetonitrile (1 mL) in the presence of  $Ir(ppy)_3$  (2 mol%, 2.6 mg, 0.04 mmol) and  $Rb_2CO_3$  (0.2 mmol, 1.0 equiv.). Purification by preparative TLC (petroleum PE/EA = 20:1) to afford **5g** as colorless oil (48 mg, 70% yield).  **$^1H$  NMR** (400 MHz,  $CDCl_3$ ):  $\delta$  8.28 – 8.21 (m, 2H), 7.41 – 7.36 (m, 2H), 7.35 – 7.23 (m, 3H), 7.22 – 7.18 (m, 1H), 7.12 (d,  $J = 8.1$  Hz, 2H), 7.06 (d,  $J = 8.0$  Hz, 2H), 4.36 (t,  $J = 8.0$  Hz, 1H), 2.30 (s, 3H), 1.65 – 1.55 (m, 2H), 0.12 (s, 3H), 0.09 (s, 3H) ppm.  **$^{13}C\{^1H\}$  NMR** (100 MHz,  $CDCl_3$ ): 157.3 (d,  $J_{C-F} = 254.3$  Hz), 145.7 (d,  $J_{C-F} = 5.0$  Hz), 142.73 (d,  $J_{C-F} = 12.2$  Hz), 140.5, 138.4, 138.0 (d,  $J_{C-F} = 25.6$  Hz), 136.6, 133.5, 129.3, 129.1, 127.9, 127.7, 122.9, 38.9, 22.0, 21.1, -2.4, -2.9 ppm.  **$^{19}F$  NMR** (376 MHz,  $CDCl_3$ )  $\delta$  -131.9 ppm. **IR** (film): 3070, 3050, 2952, 2927, 2015, 1881, 1512, 1484, 1414, 1248, 1112, 904, 834, 700  $cm^{-1}$ . **HRMS (ESI)**: calculated for  $C_{22}H_{25}FNSi^+$   $[M+H]^+$  350.1735; found 350.1730.

#### 2.4.38 3-chloro-4-(2-(dimethyl(phenyl)silyl)-1-(p-tolyl)ethyl)pyridine (**5h**)

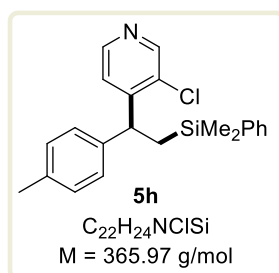

Prepared according to general procedure from 3-Chloro-4-cyanopyridine **1bh** (28 mg, 0.2 mmol, 1.0 equiv.),  $PhMe_2SiBpin$  (79 mg, 0.3 mmol, 1.5 equiv.), 4-methylstyrene **3a** (36 mg, 0.3 mmol, 1.5 equiv.) and anhydrous acetonitrile (1 mL) in the presence of  $Ir(ppy)_3$  (2 mol%, 2.6 mg, 0.04 mmol) and  $Rb_2CO_3$  (0.2 mmol, 1.0 equiv.). Purification by preparative TLC (petroleum PE/EA = 20:1) to afford **5h** as colorless oil (35 mg, 49% yield).  **$^1H$  NMR** (400 MHz,  $CDCl_3$ ):  $\delta$  8.43 (s, 1H), 8.30 (d,  $J = 5.0$  Hz, 1H), 7.42 – 7.37 (m, 2H), 7.35 – 7.29 (m, 3H), 7.23 (d,  $J = 5.1$  Hz, 1H), 7.13 (d,  $J = 8.2$  Hz, 2H), 7.06 (d,  $J = 7.8$  Hz, 2H), 4.53 (dd,  $J = 8.8, 7.0$  Hz, 1H), 2.30 (s, 3H), 1.62 – 1.53 (m, 2H), 0.15 (s, 3H), 0.10 (s, 3H) ppm.  **$^{13}C\{^1H\}$  NMR** (100 MHz,  $CDCl_3$ ):  $\delta$  153.1, 149.5, 147.8, 140.0, 138.5, 136.6, 133.5, 131.4, 129.3, 129.1, 128.0, 127.8, 123.1, 42.0, 22.8, 21.1, -2.3, -2.8 ppm. **IR** (film): 3047, 3020, 2953, 2922, 1678, 1580, 1512, 1426, 1399, 1249, 1112, 1034, 903, 835, 700  $cm^{-1}$ . **HRMS (ESI)**: calculated for  $C_{22}H_{25}NCISi^+ [M+H]^+$  366.1439; found 366.1434.

#### 2.4.39 4-(2-(dimethyl(phenyl)silyl)-1-(p-tolyl)ethyl)-3-(3,4,5-trimethoxyphenyl)pyridine (**5i**)

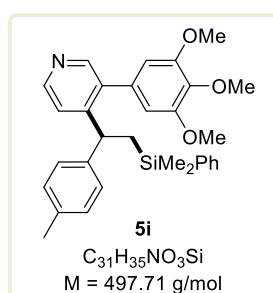

Prepared according to general procedure from 3-(3,4,5-trimethoxyphenyl)-4-cyanopyridine **1bi** (54 mg, 0.2 mmol, 1.0 equiv.),  $PhMe_2SiBpin$  (79 mg, 0.3 mmol, 1.5 equiv.), 4-methylstyrene **3a** (36 mg, 0.3 mmol, 1.5 equiv.) and anhydrous acetonitrile (1 mL) in the presence of  $Ir(ppy)_3$  (2 mol%, 2.6 mg, 0.04 mmol) and  $Rb_2CO_3$  (0.2 mmol, 1.0 equiv.). Purification by preparative TLC (petroleum PE/EA = 20:1) to afford **5i** as colorless oil (50 mg, 51% yield).  **$^1H$  NMR** (400 MHz,  $CDCl_3$ ):  $\delta$  8.53 (d,  $J = 5.3$  Hz, 1H), 8.38 (s, 1H), 7.46 (d,  $J = 5.2$  Hz, 1H), 7.38 – 7.31 (m, 1H), 7.29 (d,  $J = 3.5$  Hz, 4H), 7.01 (d,  $J = 7.9$  Hz, 2H), 6.86 – 6.83 (m, 2H), 6.26 (s, 1H), 4.23 (dd,  $J = 8.9, 6.8$  Hz, 1H), 3.94 (s, 3H), 3.72 (s, 6H), 2.29 (s, 3H), 1.62 – 1.47 (m, 2H), 0.00 (s, 3H), -0.02 (s, 3H) ppm.  **$^{13}C\{^1H\}$  NMR** (100 MHz,  $CDCl_3$ ):  $\delta$  153.0, 152.9, 150.1, 148.8, 141.8, 138.5, 137.5, 137.3, 135.9, 133.4, 133.3, 129.0, 129.0, 127.9, 127.7, 122.0,

106.8, 61.0, 56.0, 42.1, 24.6, 21.0, -2.2, -2.8 ppm. **IR** (film): 3066, 3001, 2937, 2836, 1583, 1510, 1479, 1412, 1347, 1238, 1238, 1172, 1112, 1007, 907, 834, 731  $\text{cm}^{-1}$ . **HRMS (ESI)**: calculated for  $\text{C}_{31}\text{H}_{36}\text{NO}_3\text{Si}^+$   $[\text{M}+\text{H}]^+$  498.2459; found 498.2449.

#### 2.4.40 4-(2-(dimethyl(phenyl)silyl)-1-(p-tolyl)ethyl)-3-(3-(methylthio)phenyl)pyridine (**5j**)

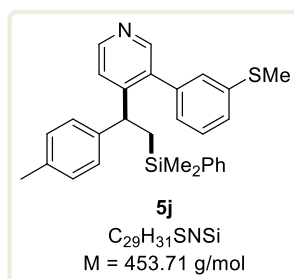

Prepared according to general procedure from 3-(3-(methylthio)phenyl)-4-cyanopyridine **1bj** (45 mg, 0.2 mmol, 1.0 equiv.),  $\text{PhMe}_2\text{SiBpin}$  (79 mg, 0.3 mmol, 1.5 equiv.), 4-methylstyrene **3a** (36 mg, 0.3 mmol, 1.5 equiv.) and anhydrous acetonitrile (1 mL) in the presence of  $\text{Ir}(\text{ppy})_3$  (2 mol%, 2.6 mg, 0.04 mmol) and  $\text{Rb}_2\text{CO}_3$  (0.2 mmol, 1.0 equiv.). Purification by preparative TLC (petroleum PE/EA = 20:1) to afford **5j** as colorless oil (53 mg, 59% yield). **<sup>1</sup>H NMR** (400 MHz,  $\text{CDCl}_3$ ):  $\delta$  8.47 (s, 1H), 8.32 (s, 1H), 7.39 (d,  $J = 5.3 \text{ Hz}$ , 1H), 7.33 – 7.28 (m, 1H), 7.27 – 7.25 (m, 3H), 7.24 – 7.22 (m, 3H), 6.98 (d,  $J = 7.9 \text{ Hz}$ , 2H), 6.89 (s, 1H), 6.82 (t,  $J = 6.4 \text{ Hz}$ , 3H), 4.17 (dd,  $J = 9.2, 6.4 \text{ Hz}$ , 1H), 2.36 (s, 3H), 2.27 (s, 3H), 1.59 – 1.53 (m, 1H), 1.46 – 1.40 (m, 1H), -0.05 (s, 3H), -0.06 (s, 3H). **<sup>13</sup>C{<sup>1</sup>H} NMR** (100 MHz,  $\text{CDCl}_3$ ):  $\delta$  153.3, 150.1, 148.9, 141.5, 138.8, 138.6, 138.5, 136.7, 136.1, 133.4, 129.1, 129.0, 128.7, 128.6, 127.8, 127.3, 126.2, 125.8, 122.1, 41.9, 24.4, 21.0, 15.5, -2.3, -2.8 ppm. **IR** (film): 3070, 3019, 2953, 2920, 2184, 1588, 1512, 1426, 1112, 900, 837, 700  $\text{cm}^{-1}$ . **HRMS (ESI)**: calculated for  $\text{C}_{29}\text{H}_{32}\text{SNSi}^+$   $[\text{M}+\text{H}]^+$  454.2019; found 454.2013.

#### 2.4.41 3-(4-(2-(dimethyl(phenyl)silyl)-1-(p-tolyl)ethyl)pyridin-3-yl)benzonitrile (**5k**)

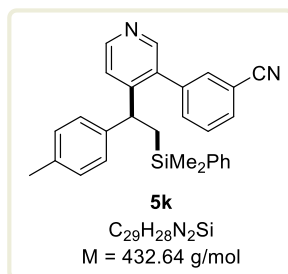

Prepared according to general procedure from 3-(3-cyanophenyl)-4-cyanopyridine **1bk** (41 mg, 0.2 mmol, 1.0 equiv.),  $\text{PhMe}_2\text{SiBpin}$  (79 mg, 0.3 mmol, 1.5 equiv.), 4-methylstyrene **3a** (36 mg, 0.3 mmol, 1.5 equiv.) and anhydrous acetonitrile (1 mL) in the presence of  $\text{Ir}(\text{ppy})_3$  (2 mol%, 2.6 mg, 0.04 mmol) and  $\text{Rb}_2\text{CO}_3$  (0.2 mmol, 1.0 equiv.). Purification by preparative TLC (petroleum PE/EA = 20:1) to afford **5k** as colorless oil (65 mg, 76% yield). **<sup>1</sup>H NMR** (400 MHz,  $\text{CDCl}_3$ ):  $\delta$  8.54 (d,  $J = 5.3 \text{ Hz}$ , 1H), 8.24 (s,

1H), 7.62 (dt,  $J = 7.7, 1.4$  Hz, 1H), 7.47 (d,  $J = 5.2$  Hz, 1H), 7.39 – 7.35 (m, 1H), 7.35 – 7.32 (m, 1H), 7.29 – 7.22 (m, 4H), 7.20 – 7.14 (m, 2H), 6.97 (d,  $J = 7.8$  Hz, 2H), 6.71 – 6.68 (m, 2H), 3.97 – 3.91 (m, 1H), 2.26 (s, 3H), 1.61 – 1.52 (m, 1H), 1.42 – 1.37 (m, 1H), -0.01 (s, 3H), -0.07 (s, 3H) ppm.  **$^{13}\text{C}\{^1\text{H}\}$  NMR** (100 MHz,  $\text{CDCl}_3$ ):  $\delta$  153.2, 149.8, 149.6, 140.9, 139.0, 138.0, 136.4, 135.0, 134.0, 133.4, 133.0, 131.3, 129.3, 129.2, 129.0, 127.9, 127.6, 122.2, 118.4, 112.6, 42.3, 24.3, 21.0, -2.1, -2.7 ppm. **IR** (film): 3060, 3028, 2254, 1589, 1249, 1116, 900, 724, 649  $\text{cm}^{-1}$ . **HRMS (ESI)**: calculated for  $\text{C}_{29}\text{H}_{29}\text{N}_2\text{Si}^+$   $[\text{M}+\text{H}]^+$  433.2095; found 433.2087.

#### 2.4.42 ethyl-4-(4-(2-(dimethyl(phenyl)silyl)-1-(p-tolyl)ethyl)pyridin-3-yl)benzoate (**5l**)

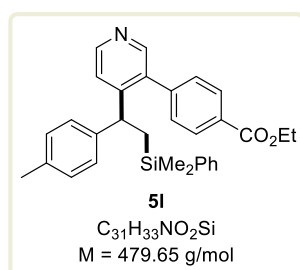

Prepared according to general procedure from ethyl 4-(4-cyanopyridin-3-yl)benzoate **1bl** (51 mg, 0.2 mmol, 1.0 equiv.),  $\text{PhMe}_2\text{SiBpin}$  (79 mg, 0.3 mmol, 1.5 equiv.), 4-methylstyrene **3a** (36 mg, 0.3 mmol, 1.5 equiv.) and anhydrous acetonitrile (1 mL) in the presence of  $\text{Ir}(\text{ppy})_3$  (2 mol%, 2.6 mg, 0.04 mmol) and  $\text{Rb}_2\text{CO}_3$  (0.2 mmol, 1.0 equiv.). Purification by preparative TLC (petroleum PE/EA = 20:1) to afford **5l** as colorless oil (62 mg, 62% yield).  **$^1\text{H}$  NMR** (400 MHz,  $\text{CDCl}_3$ ):  $\delta$  8.66 (d,  $J = 5.0$  Hz, 1H), 8.46 (s, 1H), 8.16 (d,  $J = 8.1$  Hz, 2H), 7.59 (d,  $J = 5.2$  Hz, 1H), 7.52 – 7.46 (m, 1H), 7.44 – 7.38 (m, 4H), 7.27 (d,  $J = 8.1$  Hz, 2H), 7.14 (d,  $J = 7.9$  Hz, 2H), 6.96 (d,  $J = 7.9$  Hz, 2H), 4.61 (q,  $J = 7.1$  Hz, 2H), 4.31 (dd,  $J = 9.5, 6.1$  Hz, 1H), 2.43 (s, 3H), 1.81 – 1.74 (m, 1H), 1.62 (q,  $J = 7.3$  Hz, 4H), 0.15 (s, 3H), 0.08 (s, 3H).  **$^{13}\text{C}\{^1\text{H}\}$  NMR** (100 MHz,  $\text{CDCl}_3$ ):  $\delta$  166.4, 153.3, 149.9, 149.3, 142.5, 141.2, 138.3, 136.2, 136.0, 133.5, 129.7, 129.7, 129.5, 129.2, 129.0, 127.8, 127.7, 122.1, 61.2, 41.8, 24.4, 21.0, 14.5, -2.2, -2.8 ppm. **IR** (film): 3070, 3046, 2980, 2954, 2362, 2157, 1981, 1718, 1609, 1585, 1230, 1178, 1111, 1024, 838, 769, 709  $\text{cm}^{-1}$ . **HRMS (ESI)**: calculated for  $\text{C}_{31}\text{H}_{34}\text{NO}_2\text{Si}^+$   $[\text{M}+\text{H}]^+$  480.2353; found 480.2345.

#### 2.4.43 4-(2-(dimethyl(phenyl)silyl)-1-(p-tolyl)ethyl)-3-(thiophen-2-yl)pyridine (**5m**)

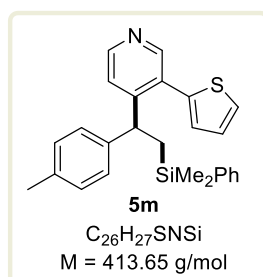

Prepared according to general procedure from 3-(thiophen-2-yl)isonicotinonitrile **1bm** (37 mg, 0.2 mmol, 1.0 equiv.), PhMe<sub>2</sub>SiBpin (79 mg, 0.3 mmol, 1.5 equiv.), 4-methylstyrene **3a** (36 mg, 0.3 mmol, 1.5 equiv.) and anhydrous acetonitrile (1 mL) in the presence of Ir(ppy)<sub>3</sub> (2 mol%, 2.6 mg, 0.04 mmol) and Rb<sub>2</sub>CO<sub>3</sub> (0.2 mmol, 1.0 equiv.). Purification by preparative TLC (petroleum PE/EA = 20:1) to afford **5m** as colorless oil (42 mg, 51% yield). **<sup>1</sup>H NMR** (400 MHz, CDCl<sub>3</sub>): δ 1 8.38 – 8.33 (m, 2H), 7.30 (dd, *J* = 5.1, 1.2 Hz, 1H), 7.26 – 7.22 (m, 2H), 7.22 – 7.19 (m, 3H), 7.17 (dt, *J* = 7.0, 1.4 Hz, 1H), 6.96 (dd, *J* = 5.2, 3.5 Hz, 1H), 6.92 (d, *J* = 7.9 Hz, 2H), 6.86 – 6.83 (m, 2H), 6.71 (dd, *J* = 3.5, 1.2 Hz, 1H), 4.42 (dd, *J* = 9.4, 6.3 Hz, 1H), 2.19 (s, 3H), 1.56 – 1.50 (m, 1H), 1.38 – 1.33 (m, 1H), -0.09 (s, 3H), -0.11 (s, 3H). **<sup>13</sup>C{<sup>1</sup>H} NMR** (100 MHz, CDCl<sub>3</sub>): δ 154.8, 151.2, 149.3, 141.2, 138.7, 138.1, 136.2, 133.5, 129.6, 129.2, 128.9, 128.2, 127.8, 127.8, 127.4, 126.5, 122.2, 41.6, 24.3, 21.1, -2.3, -2.8 ppm. **IR** (film): 3072, 3044, 3019, 2924, 2203, 1585, 1426, 1249, 1112, 900, 836, 700 cm<sup>-1</sup>. **HRMS (ESI)**: calculated for C<sub>26</sub>H<sub>28</sub>NSi<sup>+</sup> [M+H]<sup>+</sup> 414.1706; found 414.1702.

#### 2.4.44 4-(2-(dimethyl(phenyl)silyl)-1-(p-tolyl)ethyl)quinoline (**5n**)

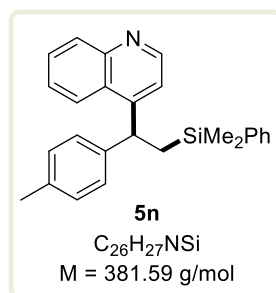

Prepared according to general procedure from quinoline-4-carbonitrile **1bn** (31 mg, 0.2 mmol, 1.0 equiv.), PhMe<sub>2</sub>SiBpin (79 mg, 0.3 mmol, 1.5 equiv.), 4-methylstyrene **3a** (36 mg, 0.3 mmol, 1.5 equiv.) and anhydrous acetonitrile (1 mL) in the presence of Ir(ppy)<sub>3</sub> (2 mol%, 2.6 mg, 0.04 mmol) and Rb<sub>2</sub>CO<sub>3</sub> (0.2 mmol, 1.0 equiv.). Purification by preparative TLC (petroleum PE/EA = 20:1) to afford **5n** as colorless oil (24 mg, 32% yield). **<sup>1</sup>H NMR** (400 MHz, CDCl<sub>3</sub>): δ 8.78 (d, *J* = 4.6 Hz, 1H), 8.07 (dd, *J* = 8.5, 1.3 Hz, 1H), 7.96 – 7.91 (m, 1H), 7.66 – 7.60 (m, 1H), 7.48 – 7.38 (m, 3H), 7.37 – 7.26 (m, 4H), 7.16 – 7.11 (m, 2H), 7.05 (d, *J* = 7.9 Hz, 2H), 4.82 – 4.77 (m, 1H), 2.28 (s, 3H), 1.76 – 1.66 (m, 2H), 0.10 (s, 3H), 0.07 (s, 3H) ppm. **<sup>13</sup>C{<sup>1</sup>H} NMR** (100 MHz, CDCl<sub>3</sub>): δ 152.7, 150.2, 148.6, 141.4, 138.6, 136.3, 133.7, 130.3, 129.3, 129.1, 128.9, 127.9, 127.8, 126.9, 126.4, 123.5, 119.2, 41.3, 24.1, 21.1, -2.2, -2.7 ppm. **IR** (film): 3092, 3020, 2950, 2924, 2362, 2176, 2011, 1587, 1510, 1426, 1249, 1112, 838, 734 cm<sup>-1</sup>. **HRMS (ESI)**: calculated for C<sub>26</sub>H<sub>28</sub>NSi<sup>+</sup> [M+H]<sup>+</sup> 382.1986; found 382.1982.

#### 2.4.45 2-(2-(dimethyl(phenyl)silyl)-1-(p-tolyl)ethyl)benzonitrile (**5o**)

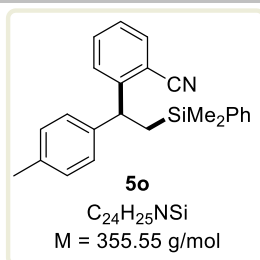

Prepared according to general procedure from phthalonitrile **1bo** (26 mg, 0.2 mmol, 1.0 equiv.),  $PhMe_2SiBpin$  (79 mg, 0.3 mmol, 1.5 equiv.), 4-methylstyrene **3a** (36 mg, 0.3 mmol, 1.5 equiv.) and anhydrous acetonitrile (1 mL) in the presence of  $Ir(ppy)_3$  (2 mol%, 2.6 mg, 0.04 mmol) and  $Rb_2CO_3$  (0.2 mmol, 1.0 equiv.). Purification by preparative TLC (petroleum PE/EA = 20:1) to afford **5o** as colorless oil (46 mg, 66% yield).  $^1H \text{ NMR}$  (400 MHz,  $CDCl_3$ ):  $\delta$  7.45 – 7.37 (m, 2H), 7.36 – 7.29 (m, 3H), 7.23 (qd,  $J = 6.1, 4.3 \text{ Hz}$ , 3H), 7.16 – 7.08 (m, 3H), 6.99 (dd,  $J = 8.2, 2.3 \text{ Hz}$ , 2H), 4.52 – 4.46 (m, 1H), 2.21 (s, 3H), 1.67 – 1.50 (m, 2H), 0.09 (s, 3H) ppm.  $^{13}C\{^1H\} \text{ NMR}$  (100 MHz,  $CDCl_3$ ):  $\delta$  150.9, 141.5, 138.6, 136.3, 133.5, 133.0, 132.9, 129.3, 129.0, 127.8, 127.6, 127.6, 126.5, 118.4, 111.9, 44.6, 23.6, 21.0, -2.4, -2.9 ppm. **IR** (film): 3072, 3052, 2954, 2222, 1598, 1511, 1426, 1249, 1111, 904, 728  $cm^{-1}$ . **HRMS (ESI)**: calculated for  $C_{24}H_{26}NSi^+ [M+H]^+$  356.1829; found 356.1821.

#### 2.4.46 4-(2-(dimethyl(phenyl)silyl)-1-(p-tolyl)ethyl)-2,5-dimethylbenzonitrile (**5p**)

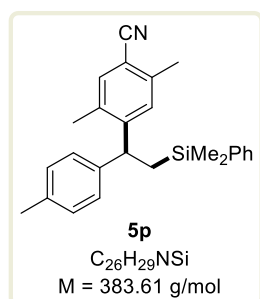

Prepared according to general procedure from 2,5-dimethylterephthalonitrile **1bp** (31 mg, 0.2 mmol, 1.0 equiv.),  $PhMe_2SiBpin$  (79 mg, 0.3 mmol, 1.5 equiv.), 4-methylstyrene **3a** (36 mg, 0.3 mmol, 1.5 equiv.) and anhydrous acetonitrile (1 mL) in the presence of  $Ir(ppy)_3$  (2 mol%, 2.6 mg, 0.04 mmol) and  $Rb_2CO_3$  (0.2 mmol, 1.0 equiv.). Purification by preparative TLC (petroleum PE/EA = 20:1) to afford **5p** as colorless oil (39 mg, 52% yield).  $^1H \text{ NMR}$  (400 MHz,  $CDCl_3$ ):  $\delta$  7.33 (dd,  $J = 4.8, 2.6 \text{ Hz}$ , 2H), 7.31 – 7.24 (m, 3H), 7.22 – 7.19 (m, 2H), 6.99 (d,  $J = 4.2 \text{ Hz}$ , 4H), 4.16 – 4.10 (m, 1H), 2.38 (s, 3H), 2.25 (s, 3H), 2.06 (s, 3H), 1.57 – 1.50 (m, 2H), 0.09 (s, 3H), 0.04 (s, 3H) ppm.  $^{13}C\{^1H\} \text{ NMR}$  (100 MHz,  $CDCl_3$ ):  $\delta$  149.9, 141.9, 139.3, 138.7, 136.0, 134.0, 133.9, 133.5, 129.2, 129.0, 129.0, 127.8, 127.7, 118.6, 109.9, 42.4, 24.2, 21.0, 20.2, 19.1, -2.2, -2.7 ppm. **IR** (film): 3068, 3019, 2952, 2923, 2362, 2220, 1611, 1529, 1426, 1248, 1112, 861, 731  $cm^{-1}$ . **HRMS (ESI)**: calculated for  $C_{26}H_{30}NSi^+ [M+H]^+$  384.2142; found 384.2140.



#### 2.4.47 2,5-dichloro-4-(2-(dimethyl(phenyl)silyl)-1-(p-tolyl)ethyl)benzonitrile (**5q**)

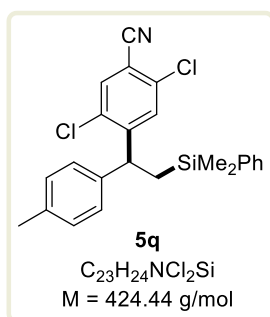

Prepared according to general procedure from 2,5-dichloroterephthalonitrile **1bq** (40 mg, 0.2 mmol, 1.0 equiv.),  $PhMe_2SiBpin$  (79 mg, 0.3 mmol, 1.5 equiv.), 4-methylstyrene **3a** (36 mg, 0.3 mmol, 1.5 equiv.) and anhydrous acetonitrile (1 mL) in the presence of  $Ir(ppy)_3$  (2 mol%, 2.6 mg, 0.04 mmol) and  $Rb_2CO_3$  (0.2 mmol, 1.0 equiv.). Purification by preparative TLC (petroleum PE/EA = 20:1) to afford **5q** as colorless oil (25 mg, 30% yield).  $^1H$  NMR (400 MHz,  $CDCl_3$ ):  $\delta$  7.44 (s, 1H), 7.32 – 7.28 (m, 3H), 7.27 – 7.21 (m, 3H), 7.03 (d, J = 5.3 Hz, 4H), 4.50 (t, J = 7.9 Hz, 1H), 2.25 (s, 3H), 1.54 (s, 1H), 1.47 – 1.42 (m, 1H), 0.13 (s, 3H), 0.06 (s, 3H) ppm.  $^{13}C\{^1H\}$  NMR (100 MHz,  $CDCl_3$ ):  $\delta$  151.7, 139.7, 138.1, 136.9, 135.2, 134.3, 133.5, 132.2, 130.1, 129.5, 129.1, 127.8, 115.0, 111.8, 42.7, 23.3, 21.1, -2.2, -3.1 ppm. IR (film): 3072, 3026, 2954, 2235, 1589, 1512, 1467, 1250, 1112, 1084, 903, 835, 700  $cm^{-1}$ . HRMS (ESI): calculated for  $C_{24}H_{24}Cl_2NSi^+$  [M+H] $^+$  424.1050; found 424.1052.

#### 2.4.48 3-(2-(dimethyl(phenyl)silyl)-1-(p-tolyl)ethyl)-2-naphthonitrile (**5r**)

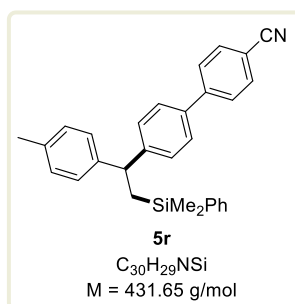

Prepared according to general procedure from [1,1'-biphenyl]-4,4'-dicarbonitrile **1br** (41 mg, 0.2 mmol, 1.0 equiv.),  $PhMe_2SiBpin$  (79 mg, 0.3 mmol, 1.5 equiv.), 4-methylstyrene **3a** (36 mg, 0.3 mmol, 1.5 equiv.) and anhydrous acetonitrile (1 mL) in the presence of  $Ir(ppy)_3$  (2 mol%, 2.6 mg, 0.04 mmol) and  $Rb_2CO_3$  (0.2 mmol, 1.0 equiv.). Purification by preparative TLC (petroleum PE/EA = 20:1) to afford **5r** as colorless oil (51 mg, 60% yield).  $^1H$  NMR (400 MHz,  $CDCl_3$ ):  $\delta$  7.70 (d, J = 8.3 Hz, 2H), 7.63 (d, J = 8.5 Hz, 2H), 7.48 – 7.42 (m, 4H), 7.39 – 7.30 (m, 5H), 7.17 (dd, J = 8.2, 2.2 Hz, 2H), 7.11 – 7.06 (m, 2H), 4.13 – 4.06 (m, 1H), 2.32 (s, 3H), 1.71 – 1.66 (m, 2H), 0.12 (s, 3H), 0.10 (s, 3H) ppm.  $^{13}C\{^1H\}$  NMR (100 MHz,  $CDCl_3$ ):  $\delta$  148.0, 145.5, 143.4, 139.0, 136.7, 135.8, 133.6, 132.6, 129.2, 128.9, 128.3, 127.8, 127.5, 127.5, 127.2, 119.1, 110.6, 46.6, 23.5, 21.0, -2.4, -2.6 ppm. IR (film): 3060, 3032, 2253,

1067, 1491, 1249, 1114, 903, 840, 700. **HRMS (ESI)**: calculated for  $C_{30}H_{30}NSi^+$   $[M+H]^+$  432.2142; found 432.2139.

#### 2.4.49 4-(1-(p-tolyl)-2-(triethylsilyl)ethyl)pyridine (**5s**)

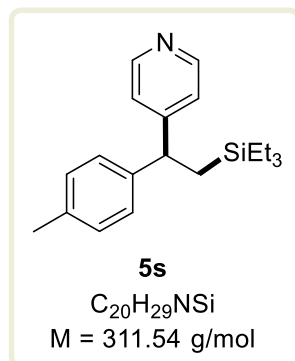

Prepared according to general procedure from 4-cyanopyridine **1b** (21 mg, 0.2 mmol, 1.0 equiv.),  $Et_3SiBpin$  (73 mg, 0.3 mmol, 1.5 equiv.), 4-methylstyrene **3a** (36 mg, 0.3 mmol, 1.5 equiv.) and anhydrous acetonitrile (1 mL) in the presence of  $Ir(ppy)_3$  (2 mol%, 2.6 mg, 0.04 mmol) and  $Rb_2CO_3$  (0.2 mmol, 1.0 equiv.). Purification by preparative TLC (petroleum PE/EA = 20:1) to afford **5s** as colorless oil (45 mg, 73% yield).  **$^1H$  NMR** (400 MHz,  $CDCl_3$ ):  $\delta$  8.46 (d, J = 5.3 Hz, 2H), 7.22 – 7.18 (m, 2H), 7.16 (d, J = 8.2 Hz, 2H), 7.08 (d, J = 8.0 Hz, 2H), 3.99 (t, J = 7.8 Hz, 1H), 2.30 (s, 3H), 1.42 – 1.33 (m, 2H), 0.84 (t, J = 7.9 Hz, 9H), 0.39 – 0.33 (m, 6H) ppm.  **$^{13}C\{^1H\}$  NMR** (100 MHz,  $CDCl_3$ ): 156.6, 149.8, 142.3, 136.3, 129.3, 127.5, 122.8, 46.3, 21.0, 18.4, 7.4, 3.5 ppm. **HRMS (ESI)**: calculated for  $C_{20}H_{30}NSi^+$   $[M+H]^+$  312.2142; found 312.2133.

#### 2.4.50 4-(2-(benzyl dimethylsilyl)-1-(p-tolyl)ethyl)benzonitrile (**5t**)

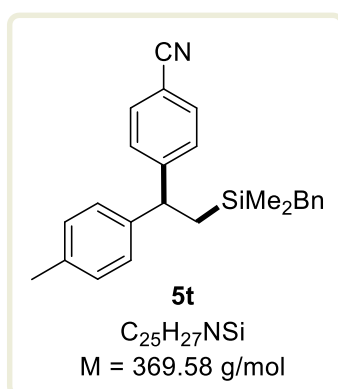

Prepared according to general procedure from 1,4-dicyanobenzene **1a** (26 mg, 0.2 mmol, 1.0 equiv.),  $Me_2BnSiBpin$  (83 mg, 0.3 mmol, 1.5 equiv.), 4-methylstyrene **3a** (36 mg, 0.3 mmol, 1.5 equiv.) and anhydrous acetonitrile (1 mL) in the presence of  $Ir(ppy)_3$  (2 mol%, 2.6 mg, 0.04 mmol) and  $Rb_2CO_3$  (0.2 mmol, 1.0 equiv.). Purification by preparative TLC (petroleum PE/EA = 20:1) to afford **5t** as colorless oil (47 mg, 69% yield).  **$^1H$  NMR** (400 MHz,  $CDCl_3$ ): 7.75 – 7.66 (m, 2H), 7.51 – 7.47 (m, 2H),

7.42 – 7.36 (m, 2H), 7.28 – 7.22 (m, 5H), 7.13 – 7.07 (m, 2H), 4.20 (t, J = 8.0 Hz, 1H), 2.46 (s, 3H), 2.13 (s, 2H), 1.65 – 1.58 (m, 1H), 1.54 – 1.49 (m, 1H), -0.04 (s, 6H) ppm.  $^{13}\text{C}\{^1\text{H}\}$  NMR (100 MHz,  $\text{CDCl}_3$ ): 153.0, 142.1, 139.9, 136.4, 132.3, 129.4, 128.3, 128.2, 128.2, 127.4, 124.2, 119.1, 109.8, 46.9, 26.0, 22.2, 21.0, -2.9 ppm. **HRMS (ESI)**: calculated for  $\text{C}_{25}\text{H}_{28}\text{NSi}^+$   $[\text{M}+\text{H}]^+$  370.1986; found 370.1998.

#### 2.4.51 4-(2-(tert-butyldimethylsilyl)-1-(p-tolyl)ethyl)benzonitrile (**5u**)

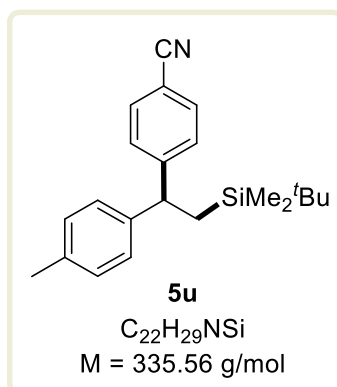

Prepared according to general procedure from 1,4-dicyanobenzene **1a** (26 mg, 0.2 mmol, 1.0 equiv.),  $\text{Me}_2^t\text{BuSiBpin}$  (73 mg, 0.3 mmol, 1.5 equiv.), 4-methylstyrene **3a** (36 mg, 0.3 mmol, 1.5 equiv.) and anhydrous acetonitrile (1 mL) in the presence of  $\text{Ir}(\text{ppy})_3$  (2 mol%, 2.6 mg, 0.004 mmol) and  $\text{Rb}_2\text{CO}_3$  (0.2 mmol, 1.0 equiv.). Purification by preparative TLC (petroleum PE/EA = 20:1) to afford **5u** as colorless oil (43 mg, 65% yield).  $^1\text{H}$  NMR (400 MHz,  $\text{CDCl}_3$ ):  $\delta$  7.69 – 7.61 (m, 2H), 7.51 – 7.48 (m, 2H), 7.25 (d, J = 8.1 Hz, 2H), 7.20 (d, J = 8.0 Hz, 2H), 4.18 (t, J = 7.9 Hz, 1H), 2.41 (s, 3H), 1.54 – 1.44 (m, 2H), 0.97 (s, 9H), -0.16 (s, 3H), -0.20 (s, 3H) ppm.  $^{13}\text{C}\{^1\text{H}\}$  NMR (100 MHz,  $\text{CDCl}_3$ ):  $\delta$  153.3, 142.5, 136.3, 132.4, 129.4, 128.3, 127.4, 119.1, 109.8, 47.3, 26.5, 21.0, 19.3, 16.7, -5.7, -5.8 ppm. **HRMS (ESI)**: calculated for  $\text{C}_{22}\text{H}_{30}\text{NSi}^+$   $[\text{M}+\text{H}]^+$  336.2142; found 336.2132.

#### 2.4.52 4-(2-(di-tert-butylsilyl)-1-(p-tolyl)ethyl)benzonitrile (**5v**)

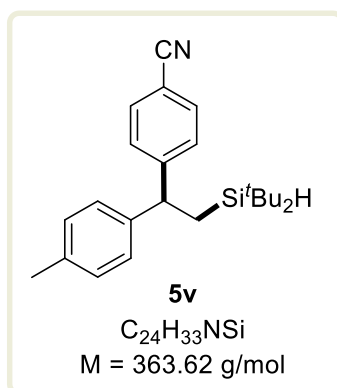

Prepared according to general procedure from 1,4-dicyanobenzene **1a** (26 mg, 0.2 mmol, 1.0 equiv.),  $\text{H}^t\text{Bu}_2\text{SiBpin}$  (81 mg, 0.3 mmol, 1.5 equiv.), 4-methylstyrene **3a** (36 mg, 0.3 mmol, 1.5 equiv.)

and anhydrous acetonitrile (1 mL) in the presence of Ir(ppy)<sub>3</sub> (2 mol%, 2.6 mg, 0.04 mmol) and Rb<sub>2</sub>CO<sub>3</sub> (0.2 mmol, 1.0 equiv.). Purification by preparative TLC (petroleum PE/EA = 20:1) to afford **5v** as colorless oil (53 mg, 70% yield). **<sup>1</sup>H NMR** (400 MHz, CDCl<sub>3</sub>): δ 7.56 (dd, J = 8.2, 1.4 Hz, 2H), 7.39 (dd, J = 8.4, 2.0 Hz, 2H), 7.16 (dd, J = 8.3, 2.2 Hz, 2H), 7.11 (dd, J = 8.1, 1.8 Hz, 2H), 4.19 (t, J = 7.9 Hz, 1H), 3.18 (q, J = 2.7 Hz, 1H), 2.31 (s, 3H), 1.47 – 1.37 (m, 2H), 0.98 (s, 9H), 0.96 (s, 9H) ppm. **<sup>13</sup>C{<sup>1</sup>H} NMR** (100 MHz, CDCl<sub>3</sub>): δ 152.6, 142.3, 136.2, 132.3, 129.3, 128.7, 127.6, 119.1, 109.8, 48.7, 28.8, 28.8, 21.1, 18.9, 18.8, 16.4 ppm. **HRMS (ESI)**: calculated for C<sub>24</sub>H<sub>34</sub>NSi<sup>+</sup> [M+H]<sup>+</sup> 364.2455; found 364.2444.

#### 2.4.53 1-(3-(1-(dimethyl(phenyl)silyl)-2-(pyridin-4-yl)propan-2-yl)phenyl) 4-methyl bicyclo[2.2.2]octane-1,4-dicarboxylate (**5w**)

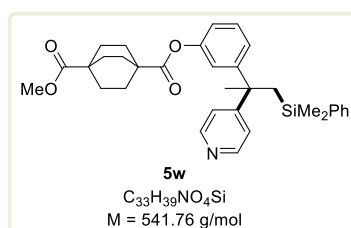

Prepared according to general procedure from 4-cyanopyridine **1b** (21 mg, 0.2 mmol, 1.0 equiv.), PhMe<sub>2</sub>SiBpin (79 mg, 0.3 mmol, 1.5 equiv.), 1-methyl 4-(3-(prop-1-en-2-yl)phenyl) bicyclo[2.2.2]octane-1,4-dicarboxylate (99 mg, 0.3 mmol, 1.5 equiv.) and anhydrous acetonitrile (1 mL) in the presence of Ir(ppy)<sub>3</sub> (2 mol%, 2.6 mg, 0.04 mmol) and Rb<sub>2</sub>CO<sub>3</sub> (0.2 mmol, 1.0 equiv.). Purification by preparative TLC (petroleum PE/EA = 20:1) to afford **6w** as colorless oil (54 mg, 50% yield). **<sup>1</sup>H NMR** (400 MHz, CDCl<sub>3</sub>): δ 8.40 (d, J = 5.8 Hz, 2H), 7.38 – 7.33 (m, 2H), 7.32 – 7.24 (m, 3H), 7.20 (t, J = 7.9 Hz, 1H), 7.08 – 7.05 (m, 2H), 6.93 (d, J = 8.5 Hz, 1H), 6.86 – 6.80 (m, 2H), 3.64 (s, 3H), 1.98 – 1.91 (m, 6H), 1.89 – 1.82 (m, 6H), 1.75 (s, 2H), 1.52 (s, 3H), 0.01 (s, 3H), -0.02 (s, 3H) ppm. **<sup>13</sup>C{<sup>1</sup>H} NMR** (100 MHz, CDCl<sub>3</sub>): δ 177.7, 175.9, 160.1, 150.9, 150.9, 149.5, 139.5, 133.5, 129.1, 128.9, 127.8, 124.7, 122.2, 120.1, 119.4, 51.8, 45.3, 39.1, 38.7, 30.6, 29.6, 27.8, 27.8, -1.4, -1.5 ppm. **IR** (film): 3072, 2953, 2873, 2253, 1724, 1595, 1427, 1250, 1200, 1112, 904, 837, 649 cm<sup>-1</sup>. **HRMS (ESI)**: calculated for C<sub>33</sub>H<sub>39</sub>NO<sub>4</sub>Si<sup>+</sup> [M+H]<sup>+</sup> 542.2721; found 542.2714. Spectra data are consistent with literature data.<sup>[1]</sup>

#### 2.4.54 (1S,2R,4S)-1,7,7-trimethylbicyclo[2.2.1]heptan-2-yl 4-(1-(dimethyl(phenyl)silyl)-2-(pyridin-4-yl)propan-2-yl)benzoate (**5x**)

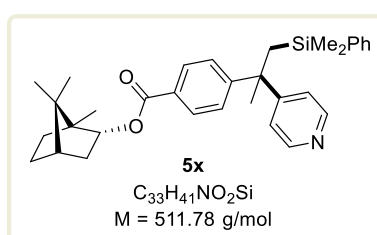

Prepared according to general procedure from 4-cyanopyridine **1b** (21 mg, 0.2 mmol, 1.0 equiv.), PhMe<sub>2</sub>SiBpin (79 mg, 0.3 mmol, 1.5 equiv.), (1*S*,2*R*,4*S*)-1,7,7-trimethylbicyclo[2.2.1]heptan-2-yl 4-(prop-1-en-2-yl)benzoate (90 mg, 0.3 mmol, 1.5 equiv.) and anhydrous acetonitrile (1 mL) in the presence of Ir(ppy)<sub>3</sub> (2 mol%, 2.6 mg, 0.04 mmol) and Rb<sub>2</sub>CO<sub>3</sub> (0.2 mmol, 1.0 equiv.). Purification by preparative TLC (petroleum PE/EA = 20:1) to afford **5x** as colorless oil (46 mg, 45% yield). **<sup>1</sup>H NMR** (400 MHz, CDCl<sub>3</sub>): δ 8.42 (d, J = 5.8 Hz, 2H), 7.89 (d, J = 8.3 Hz, 2H), 7.39 – 7.24 (m, 5H), 7.23 – 7.18 (m, 2H), 7.09 – 7.04 (m, 2H), 5.12 – 5.06 (m, 1H), 2.50 – 2.41 (m, 1H), 2.13 – 2.05 (m, 1H), 1.82 (d, J = 3.9 Hz, 2H), 1.72 (t, J = 4.5 Hz, 1H), 1.58 (s, 3H), 1.43 – 1.25 (m, 3H), 1.10 (dd, J = 13.8, 3.5 Hz, 1H), 0.96 (s, 3H), 0.91 – 0.88 (m, 6H), 0.02 (s, 3H), -0.04 (s, 3H). **<sup>13</sup>C{<sup>1</sup>H} NMR** (100 MHz, CDCl<sub>3</sub>): δ 166.6, 159.9, 154.2, 149.6, 139.2, 133.4, 129.5, 129.0, 128.9, 127.9, 127.2, 122.2, 80.5, 49.2, 48.0, 45.6, 45.1, 37.0, 30.5, 29.6, 28.2, 27.5, 19.8, 19.0, 13.7, -1.3, -1.3 ppm. **IR** (film): 3072, 2954, 2878, 2253, 1712, 1593, 1407, 1426, 1281, 1113, 1016, 904, 700, 649 cm<sup>-1</sup>. **HRMS (ESI)**: calculated for C<sub>33</sub>H<sub>41</sub>NO<sub>2</sub>Si<sup>+</sup> [M+H]<sup>+</sup> 512.2979; found 512.2976. Spectra data are consistent with literature data.<sup>[1]</sup>

2.4.55 (5-(benzoyloxy)-2-oxohexahydro-2H-cyclopenta[b]furan-4-yl)methyl 4-(1-(dimethyl(phenyl)silyl)-2-(pyridin-4-yl)propan-2-yl)benzoate (**5y**)

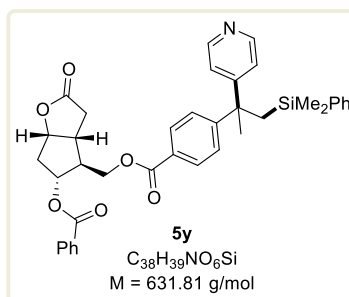

Prepared according to general procedure from 4-cyanopyridine **1b** (21 mg, 0.2 mmol, 1.0 equiv.), PhMe<sub>2</sub>SiBpin (79 mg, 0.3 mmol, 1.5 equiv.), ((3*aR*,4*S*,5*R*,6*aS*)-5-(benzoyloxy)-2-oxohexahydro-2H-cyclopenta[b]furan-4-yl)methyl 4-(prop-1-en-2-yl)benzoate (157 mg, 0.3 mmol, 1.5 equiv.) and anhydrous acetonitrile (1 mL) in the presence of Ir(ppy)<sub>3</sub> (2 mol%, 2.6 mg, 0.04 mmol) and Rb<sub>2</sub>CO<sub>3</sub> (0.2 mmol, 1.0 equiv.). Purification by preparative TLC (petroleum PE/EA = 20:1) to afford **5y** as colorless oil (40 mg, 31% yield). **<sup>1</sup>H NMR** (400 MHz, CDCl<sub>3</sub>): δ 8.44 (d, J = 5.3 Hz, 2H), 8.06 – 7.94 (m, 2H), 7.89 – 7.84 (m, 2H), 7.57 – 7.51 (m, 1H), 7.42 (t, J = 7.7 Hz, 2H), 7.36 – 7.26 (m, 5H), 7.24 – 7.20 (m, 2H), 7.08 – 7.04 (m, 2H), 5.48 – 5.43 (m, 1H), 5.14 – 5.08 (m, 1H), 4.42 – 4.32 (m, 2H), 2.99 – 2.86 (m, 2H), 2.66 – 2.55 (m, 3H), 2.42 – 2.36 (m, 1H), 1.81 (s, 2H), 1.58 (s, 3H), 0.02 (s, 3H), 0.00 (s, 3H) ppm. **<sup>13</sup>C{<sup>1</sup>H} NMR** (100 MHz, CDCl<sub>3</sub>): δ 176.2, 166.1, 166.0, 159.6, 155.1, 149.6, 139.1, 133.4, 129.8, 129.7, 129.6, 129.5, 129.0, 128.6, 128.6, 127.9, 127.4, 122.2, 84.0, 77.4, 64.5, 51.7, 45.7, 40.7, 38.3, 35.8, 30.5, 29.5, -1.3, -1.4 ppm. **IR** (film): 3060, 3020, 2298, 2254, 1773, 1719, 1269, 1108, 1269, 1194, 1108, 903, 734, 649 cm<sup>-1</sup>. **HRMS (ESI)**: calculated for C<sub>38</sub>H<sub>40</sub>NO<sub>6</sub>Si<sup>+</sup> [M+H]<sup>+</sup> 634.2619; found 634.2607. Spectra data are consistent with literature data.<sup>[1]</sup>

2.4.56 (3-benzhydrylazetid-1-yl)methyl 4-(1-(dimethyl(phenyl)silyl)-2-(pyridin-4-yl)propan-2-yl)benzoate (**5z**)

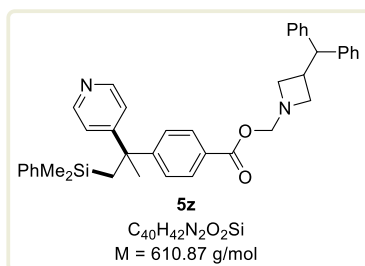

Prepared according to general procedure from 4-cyanopyridine **1b** (21 mg, 0.2 mmol, 1.0 equiv.), PhMe<sub>2</sub>SiBpin (79 mg, 0.3 mmol, 1.5 equiv.), (1-benzhydrylazetid-3-yl)methyl 4-(prop-1-en-2-yl)benzoate (119 mg, 0.3 mmol, 1.5 equiv.) and anhydrous acetonitrile (1 mL) in the presence of Ir(ppy)<sub>3</sub> (2 mol%, 2.6 mg, 0.04 mmol) and Rb<sub>2</sub>CO<sub>3</sub> (0.2 mmol, 1.0 equiv.). Purification by preparative TLC (petroleum PE/EA = 20:1) to afford **5z** as colorless oil (41 mg, 34% yield). **<sup>1</sup>H NMR** (400 MHz, CDCl<sub>3</sub>): δ 8.48 – 8.39 (m, 2H), 7.94 – 7.86 (m, 2H), 7.44 – 7.39 (m, 4H), 7.37 – 7.16 (m, 13H), 7.08 – 7.05 (m, 2H), 4.48 (d, J = 6.8 Hz, 2H), 4.37 (s, 1H), 3.34 (t, J = 7.6 Hz, 2H), 3.01 (dd, J = 7.6, 5.9 Hz, 2H), 2.92 – 2.82 (m, 1H), 1.83 (d, J = 1.9 Hz, 2H), 0.04 (s, 3H), 0.01 (s, 3H) ppm. **<sup>13</sup>C{<sup>1</sup>H} NMR** (100 MHz, CDCl<sub>3</sub>): δ 166.3, 159.9, 154.4, 149.7, 142.1, 139.2, 133.4, 129.5, 129.0, 128.5, 128.2, 127.9, 127.5, 127.3, 127.2, 122.2, 78.1, 66.9, 56.3, 45.6, 30.5, 29.5, 29.1, -1.3, -1.4 ppm. **IR** (film): 3068, 3025, 2952, 2831, 2252, 1716, 1593, 1490, 1408, 1250, 1111, 1016, 906, 704 cm<sup>-1</sup>. **HRMS (ESI)**: calculated for C<sub>40</sub>H<sub>43</sub>N<sub>2</sub>O<sub>2</sub>Si<sup>+</sup> [M+H]<sup>+</sup> 611.3088; found 611.3080. Spectra data are consistent with literature data.<sup>[1]</sup>

### 3. Computational Investigations

All calculations were performed with the Gaussian 16 package.<sup>[7]</sup> Geometry optimizations were performed at M06-2X<sup>[8]</sup>/6-31G(d,p) level of theory in conjugation with the polarizable continuum model (PCM) solvation model for acetonitrile.<sup>[9]</sup> To get more accurate energies, single-point energy calculations were done with the same functional and solvation model using the cc-pVTZ basis set. The 3D structures of the optimized species were generated using CYLview.<sup>[10]</sup>

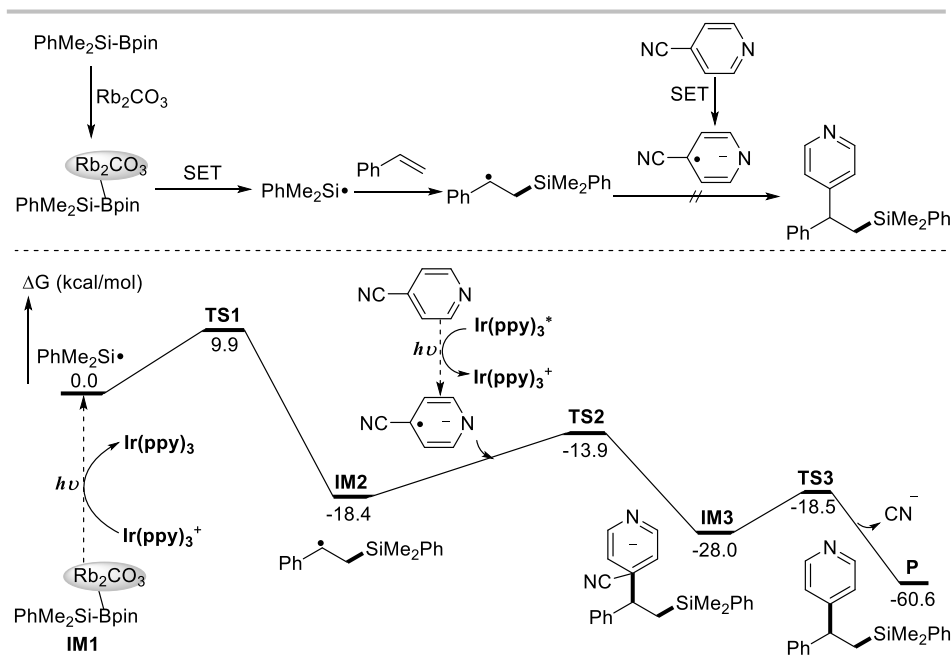

**Figure S2.** Gibbs free energy profile of PhMe<sub>2</sub>Si radical, styrene and 4-canopyridine radical anion.

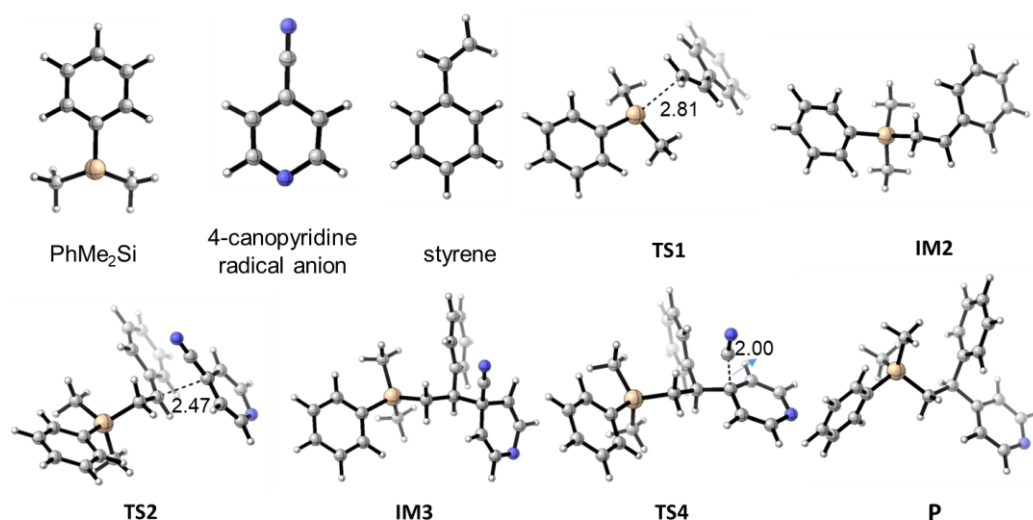

**Figure S3.** Optimized structures of reactants, transition states, intermediates and product for the reaction of PhMe<sub>2</sub>Si radical, styrene and 4-canopyridine radical anion (atom-atom distances in Å).

## 4. NMR Spectra

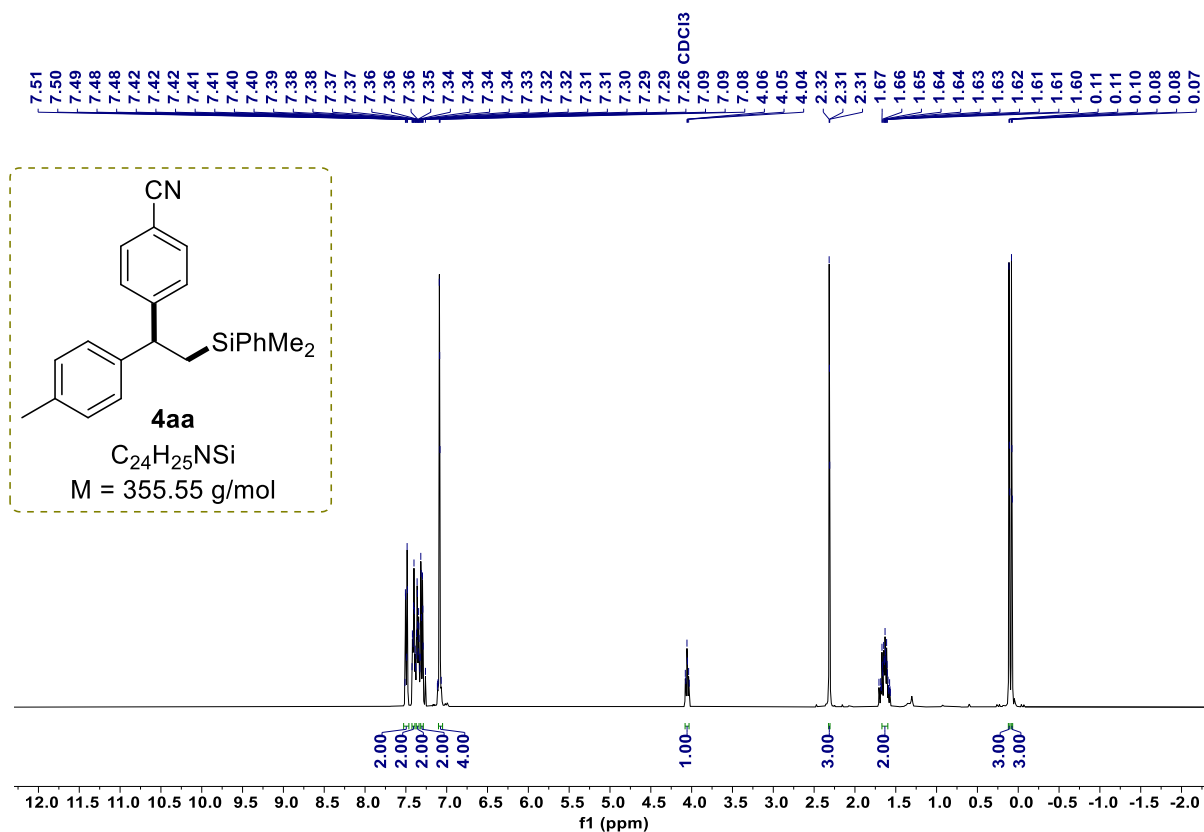

$^1H$  NMR spectrum (400 MHz,  $CDCl_3$ ) of compound **4aa**.

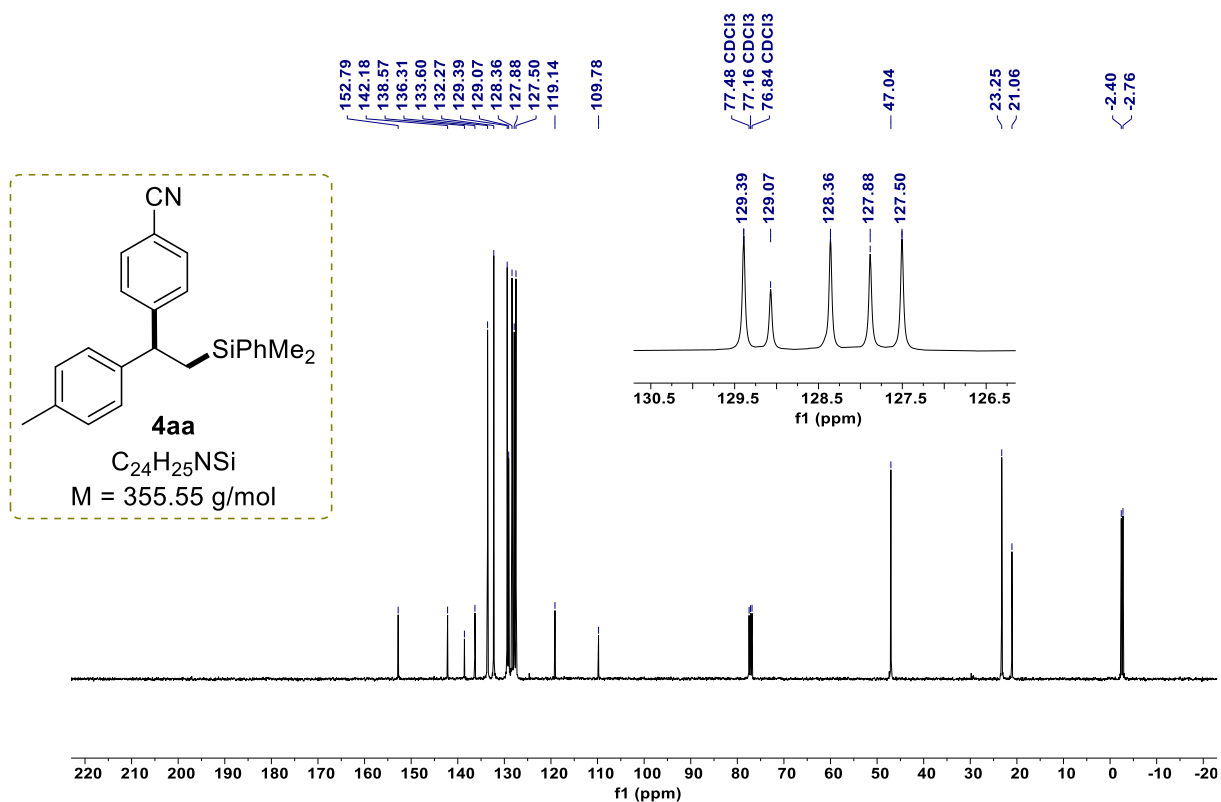

$^{13}C$  NMR spectrum (100 MHz,  $CDCl_3$ ) of compound **4aa**.



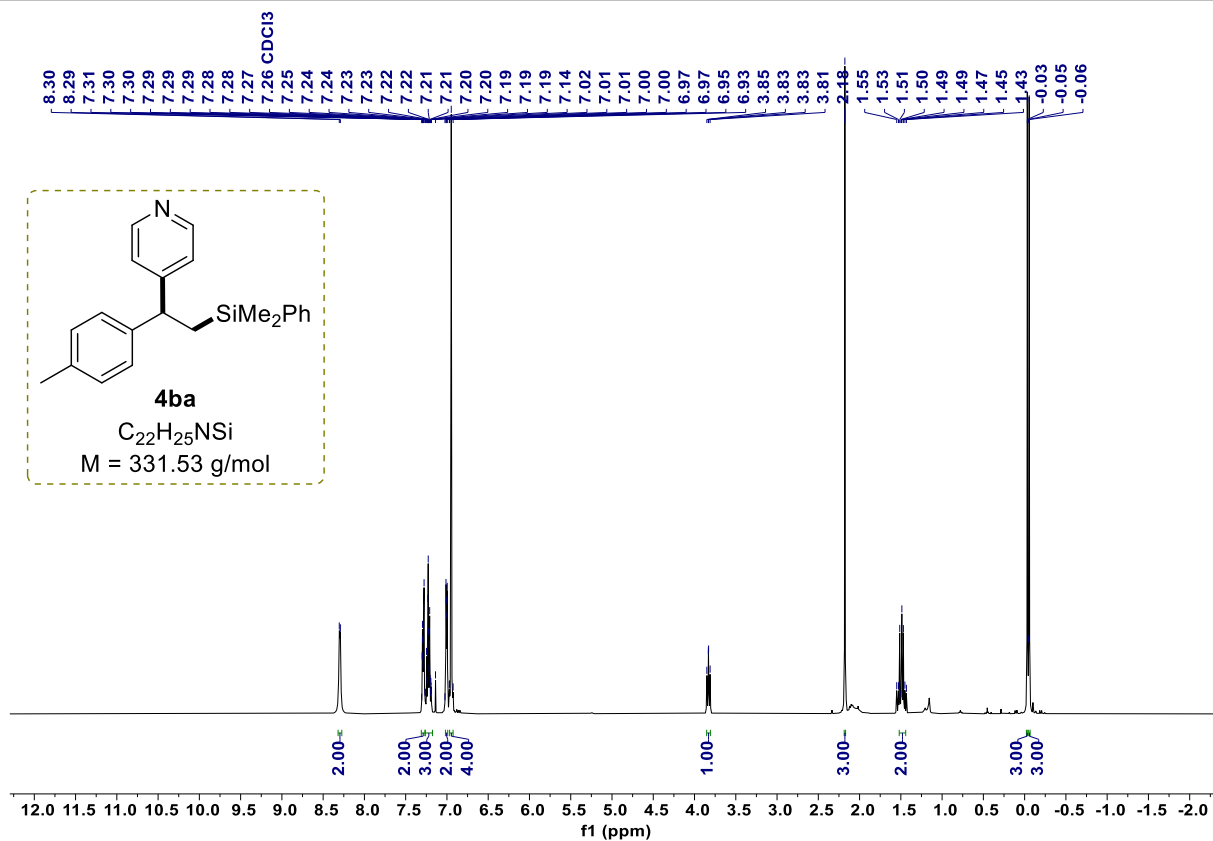

$^1H$  NMR spectrum (400 MHz,  $CDCl_3$ ) of compound **4ba**.

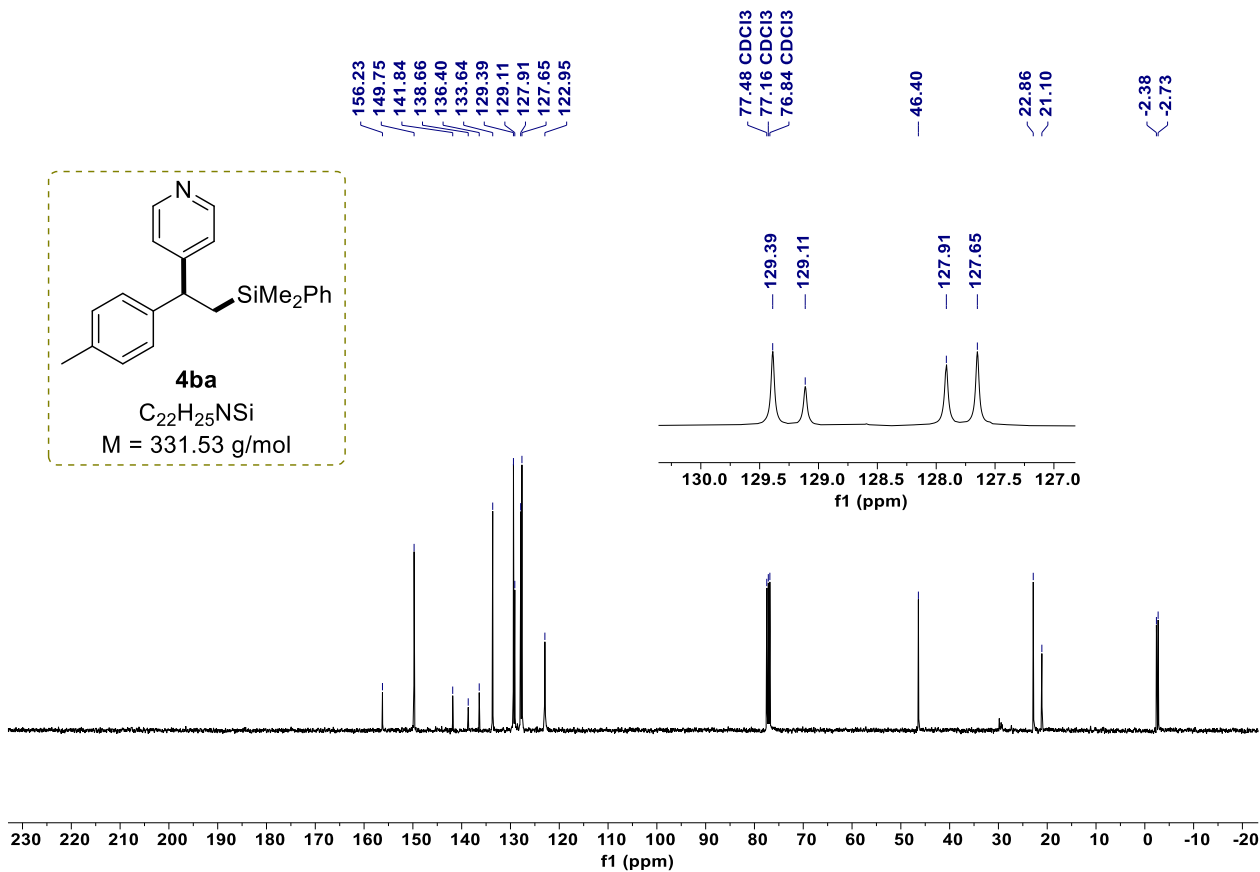

$^{13}C$  NMR spectrum (100 MHz,  $CDCl_3$ ) of compound **4ba**.

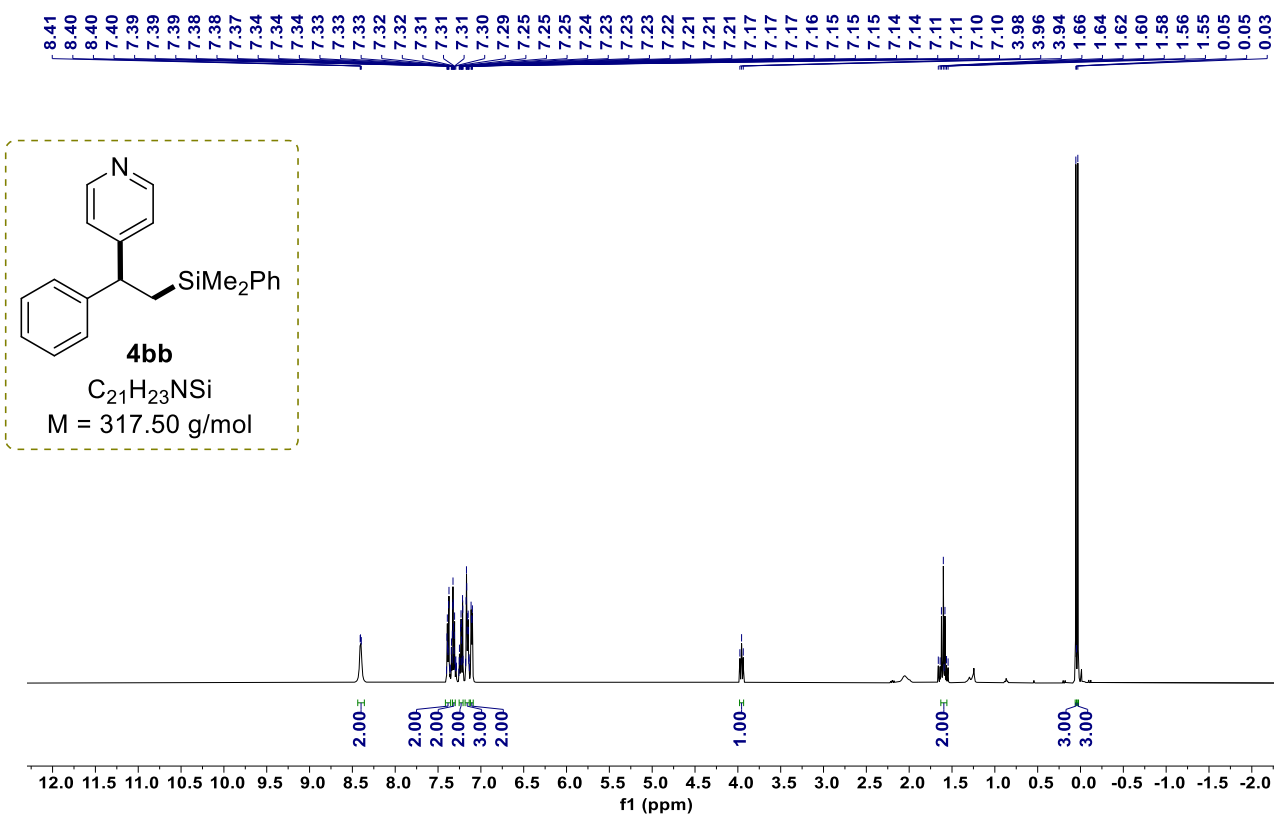

$^1\text{H}$  NMR spectrum (400 MHz,  $\text{CDCl}_3$ ) of compound **4bb**.

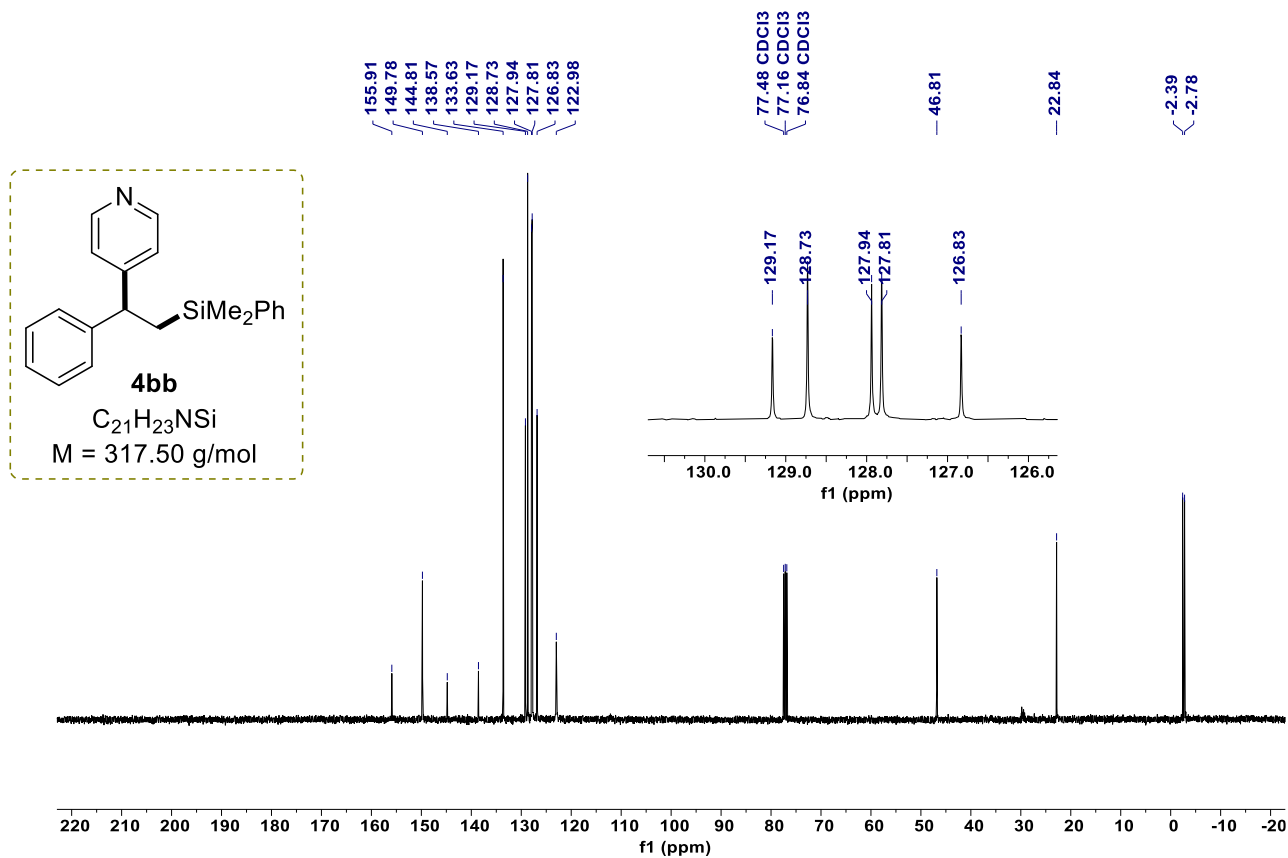

$^{13}\text{C}\{^1\text{H}\}$  NMR spectrum (100 MHz,  $\text{CDCl}_3$ ) of compound **4bb**.

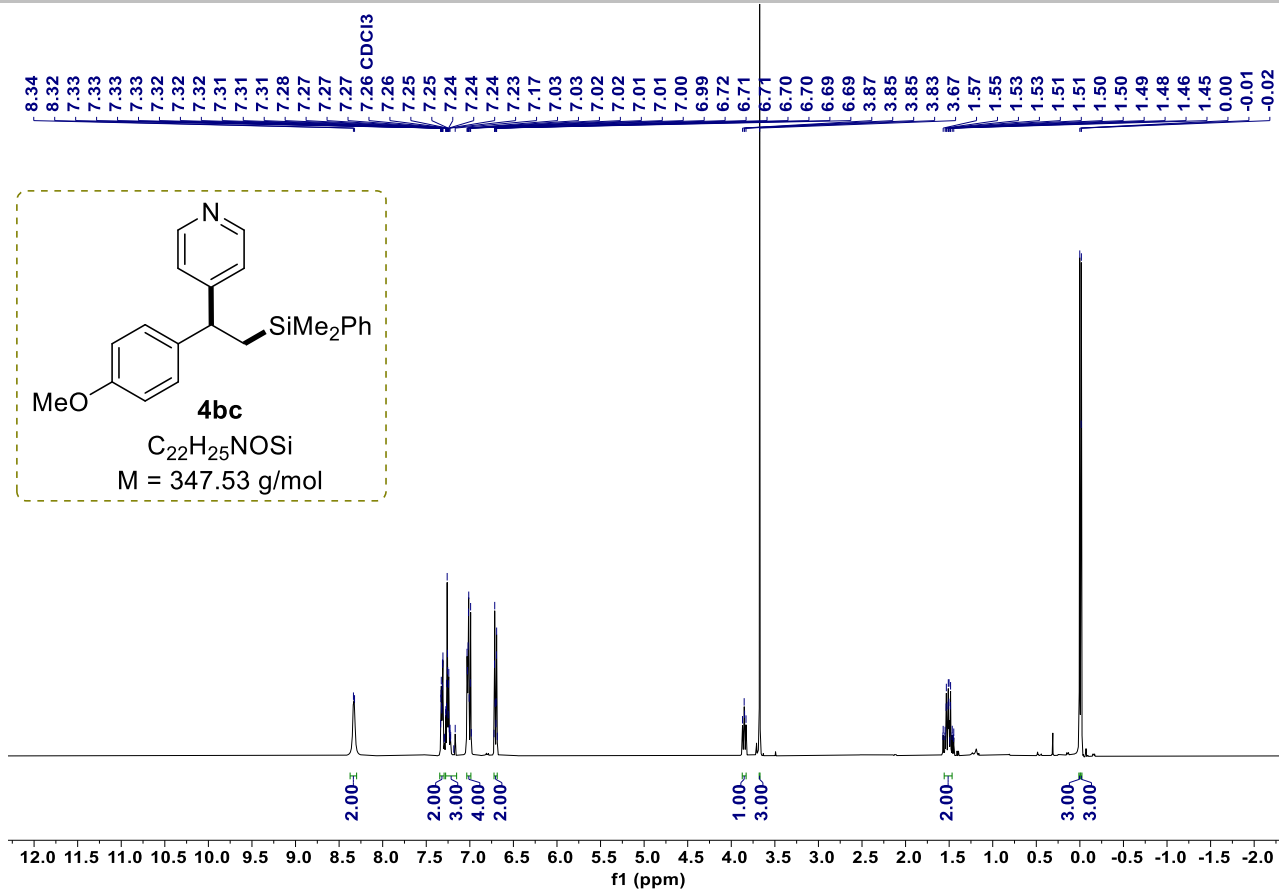

$^1\text{H}$  NMR spectrum (400 MHz,  $\text{CDCl}_3$ ) of compound **4bc**.

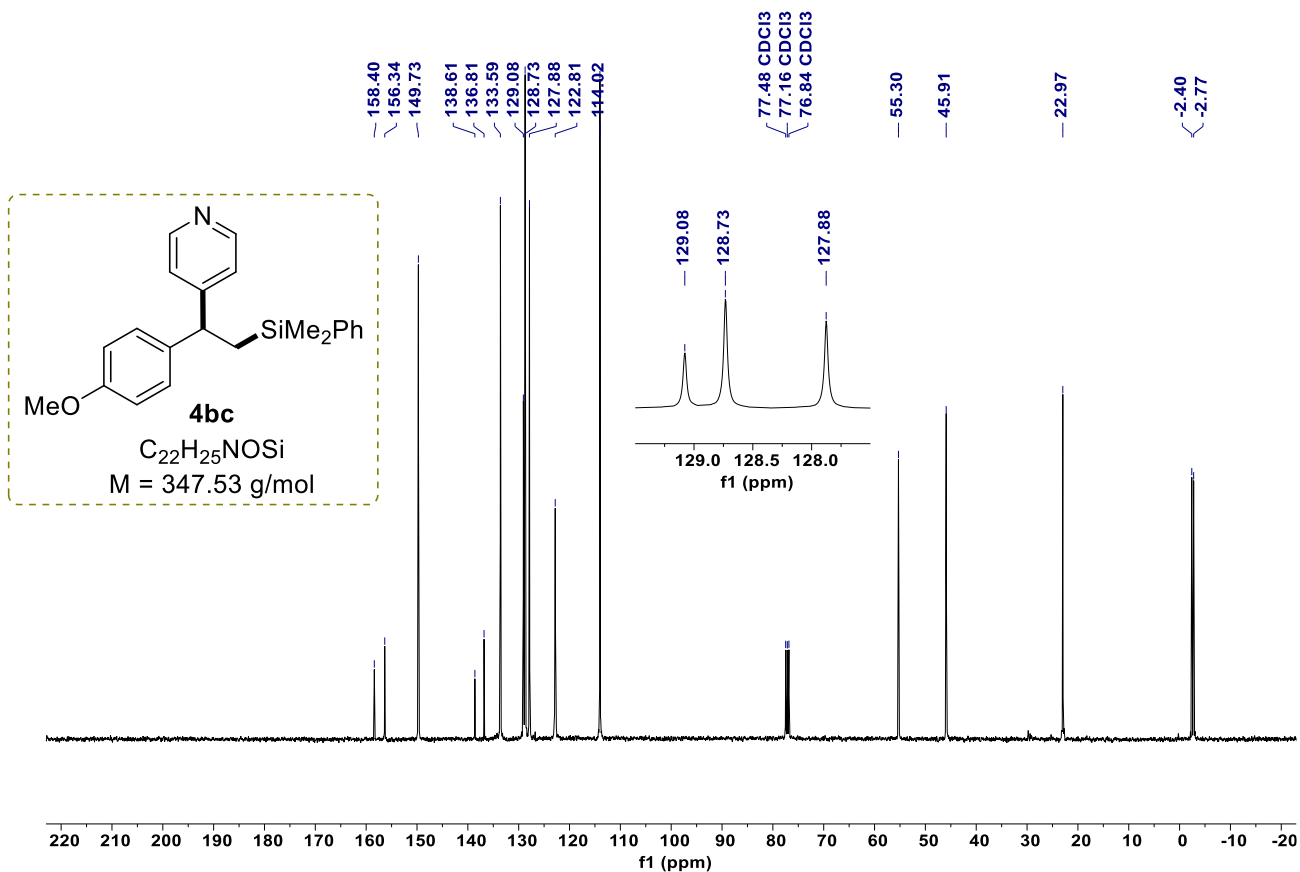

$^{13}\text{C}\{^1\text{H}\}$  NMR spectrum (100 MHz,  $\text{CDCl}_3$ ) of compound **4bc**.

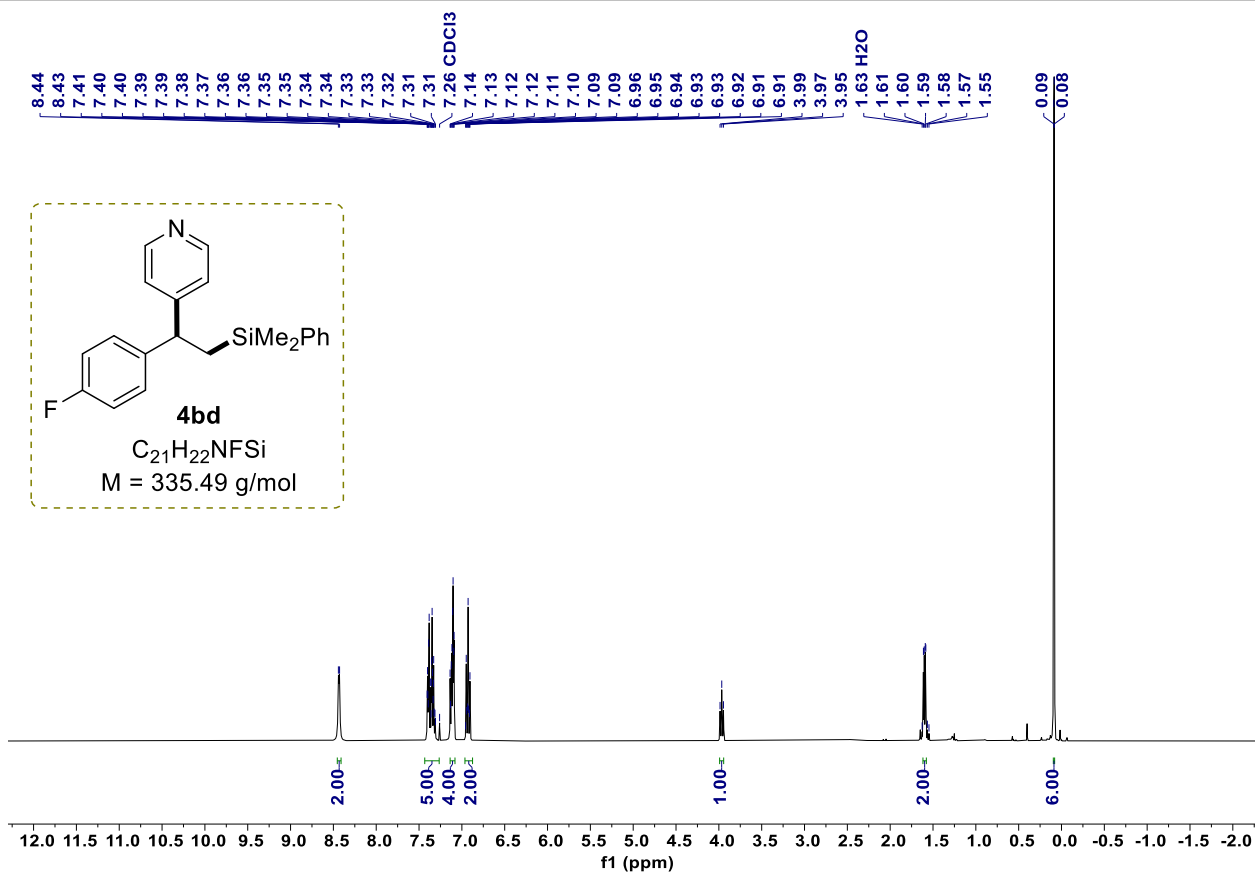

<sup>1</sup>H NMR spectrum (400 MHz, CDCl<sub>3</sub>) of compound **4bd**.

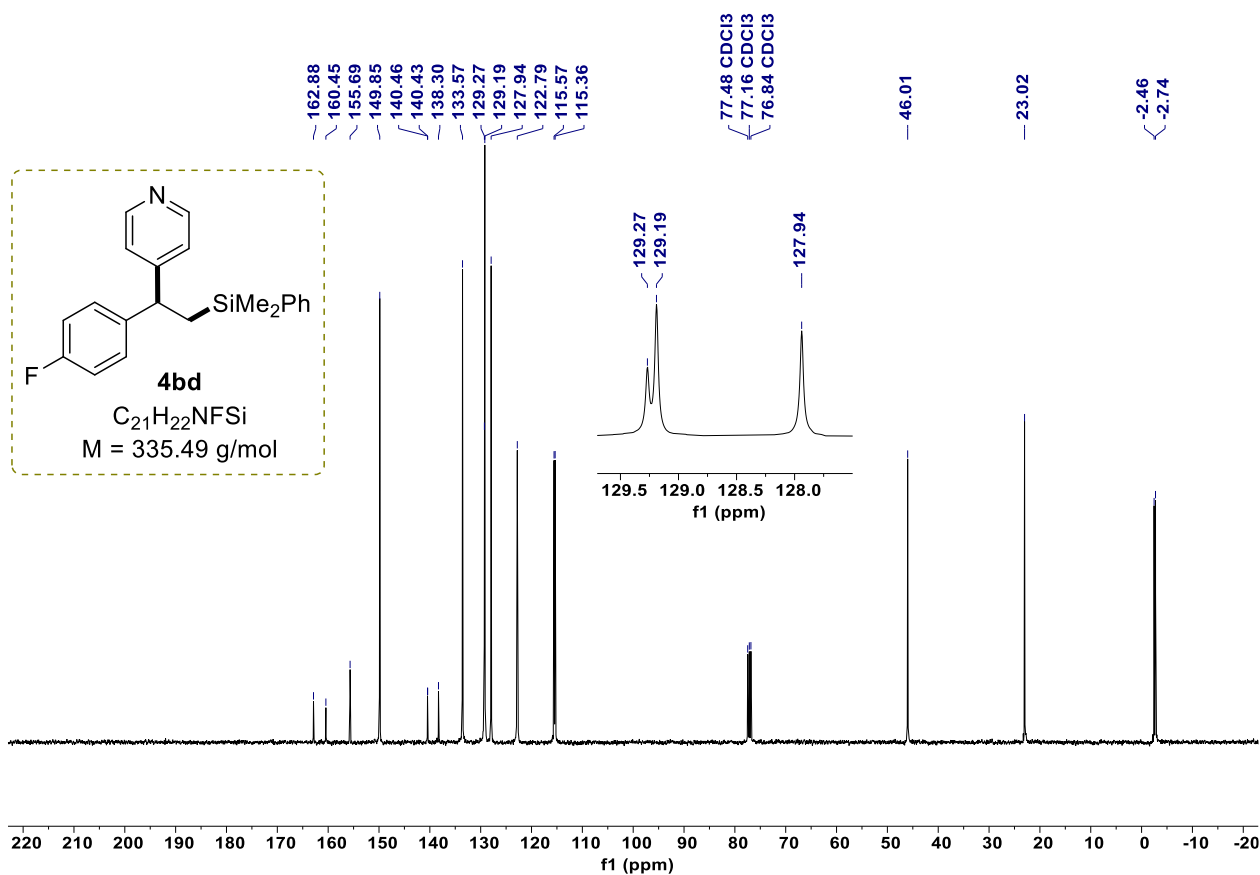

<sup>13</sup>C{<sup>1</sup>H} NMR spectrum (100 MHz, CDCl<sub>3</sub>) of compound **4bd**.

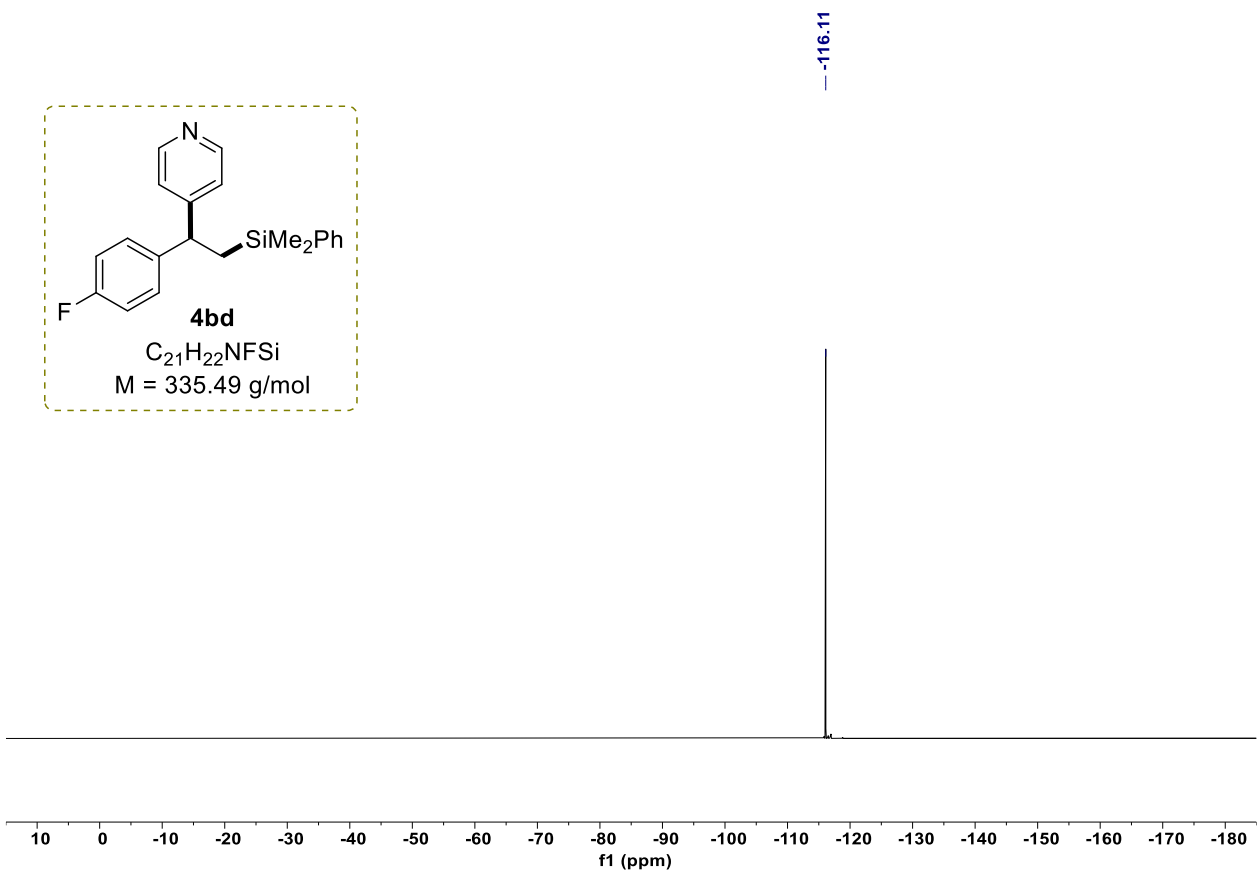

$^{19}F$  NMR (376 MHz,  $CDCl_3$ ) of compound **4bd**.

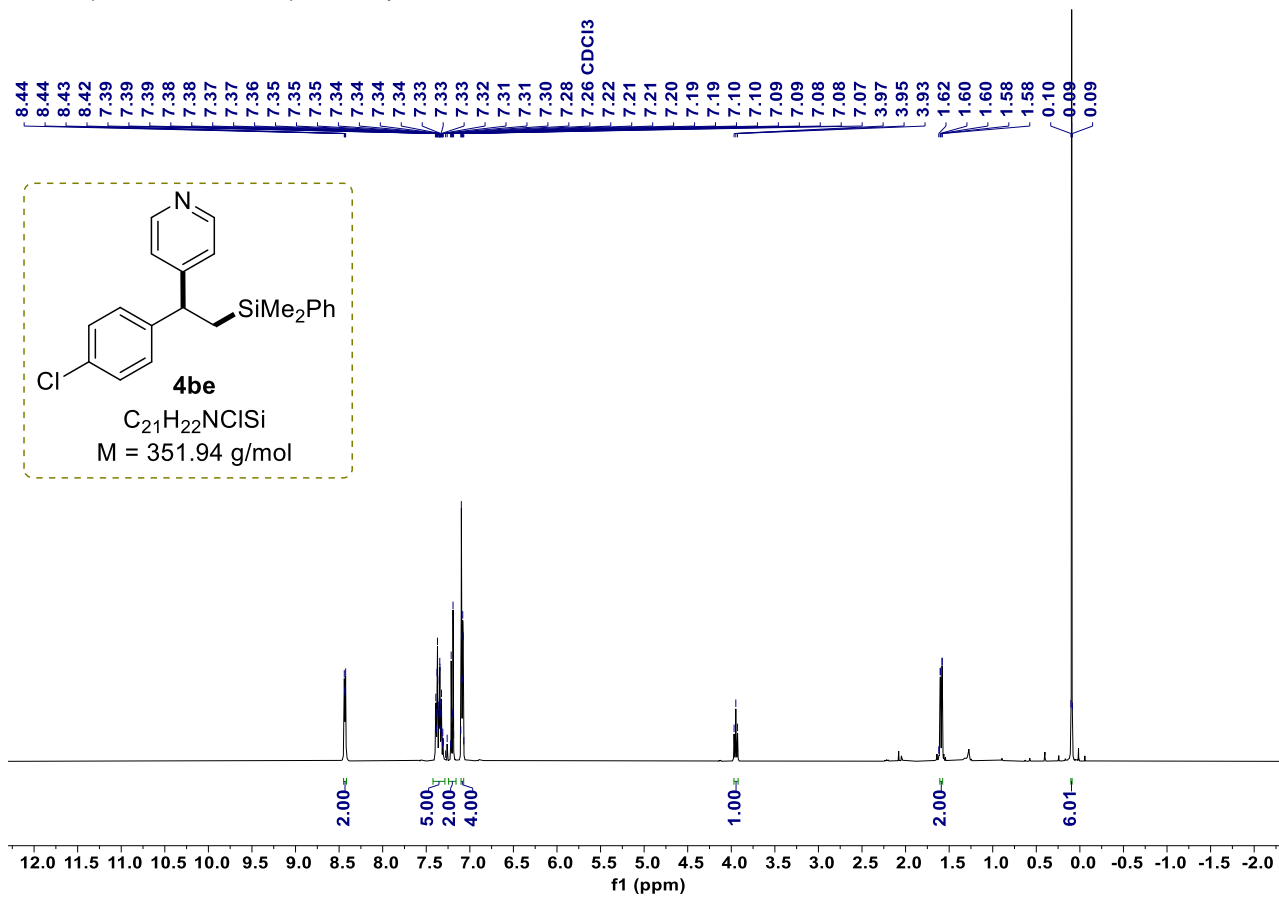

$^1H$  NMR spectrum (400 MHz,  $CDCl_3$ ) of compound **4be**.

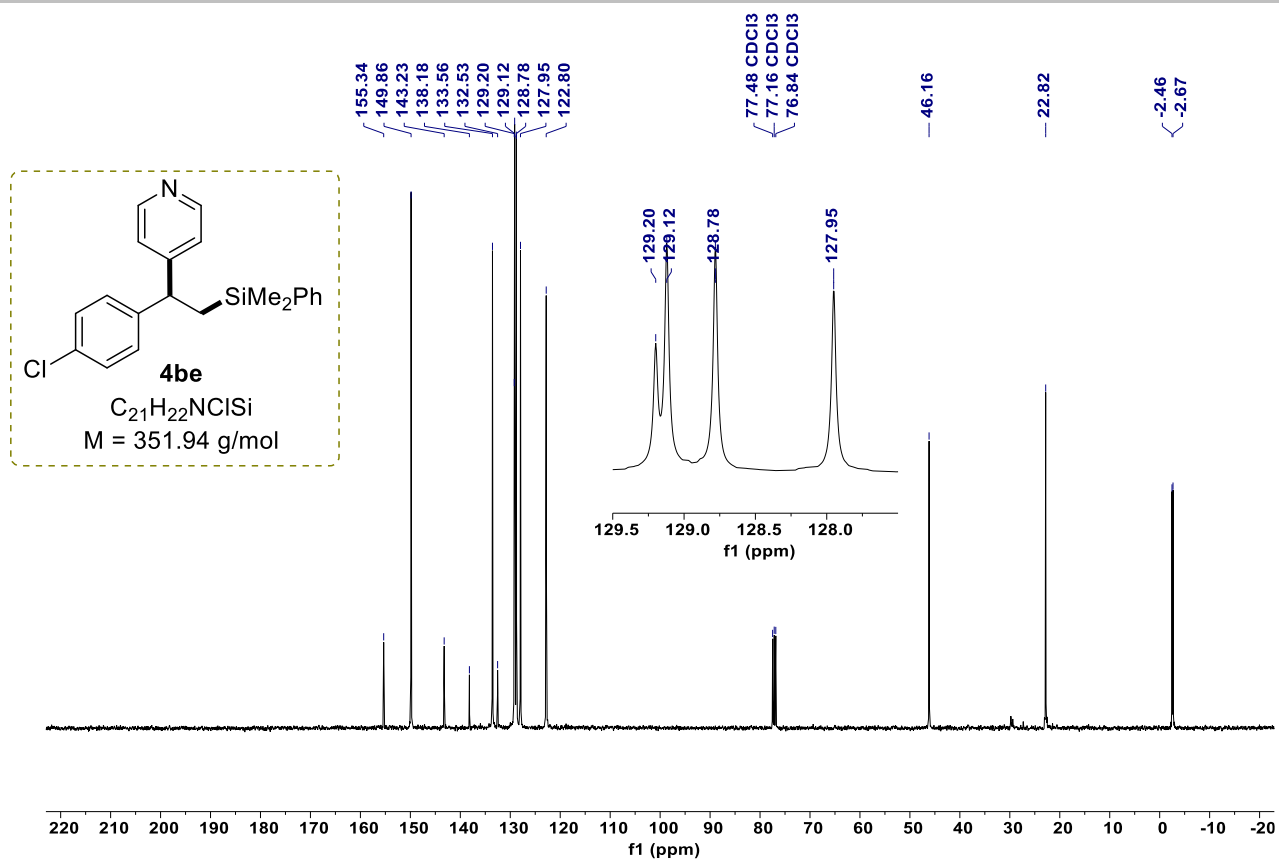

$^{13}C\{^1H\}$  NMR spectrum (100 MHz,  $CDCl_3$ ) of compound **4be**.

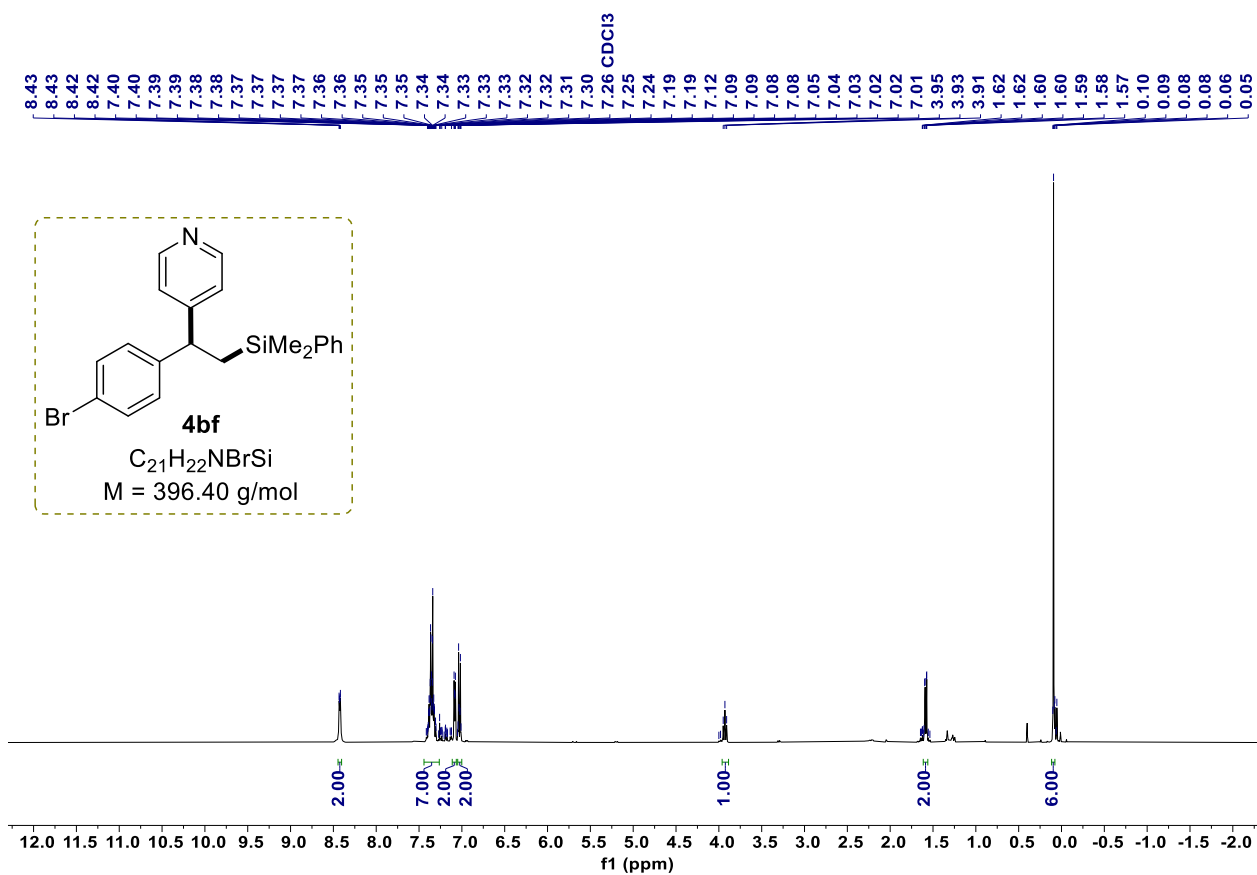

$^1H$  NMR spectrum (400 MHz,  $CDCl_3$ ) of compound **4bf**.

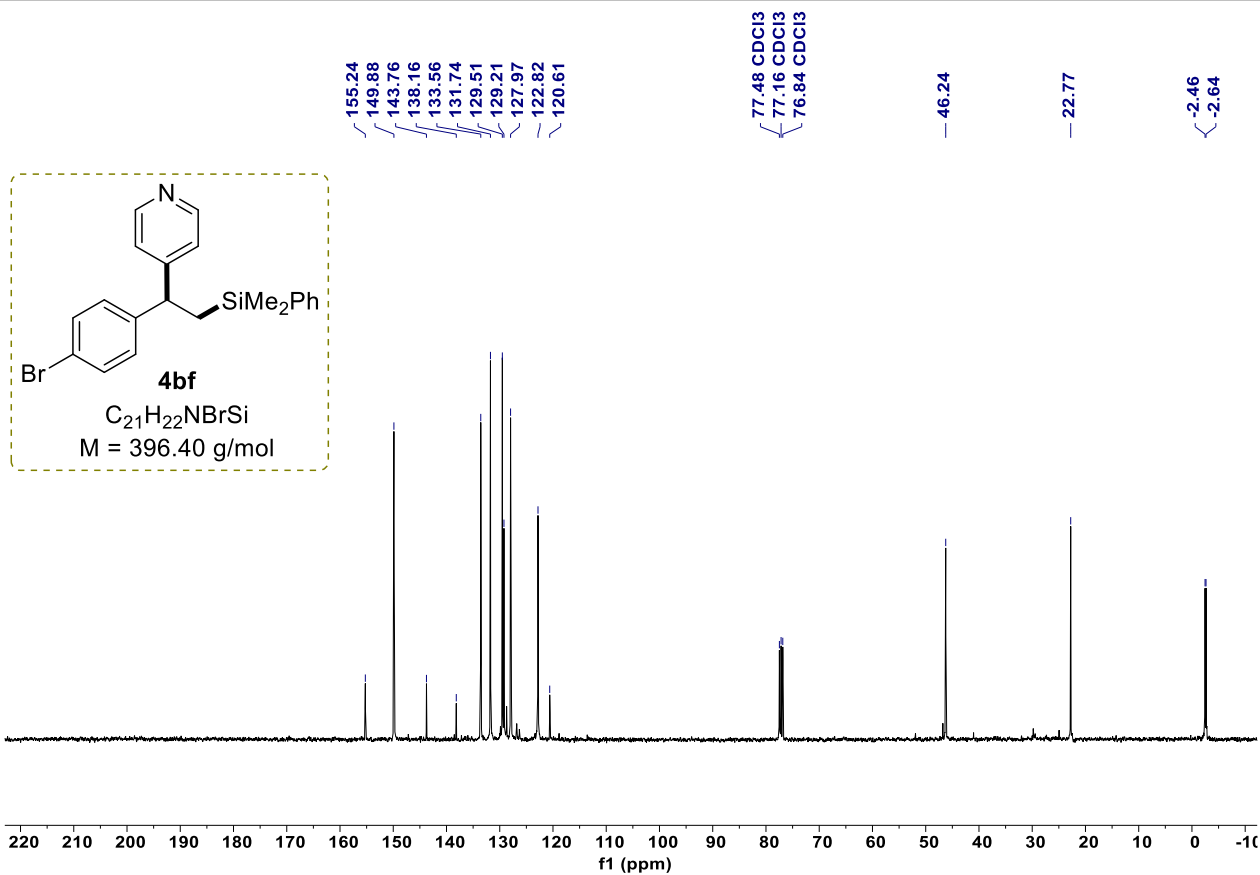

$^{13}C\{^1H\}$  NMR spectrum (100 MHz,  $CDCl_3$ ) of compound **4bf**.

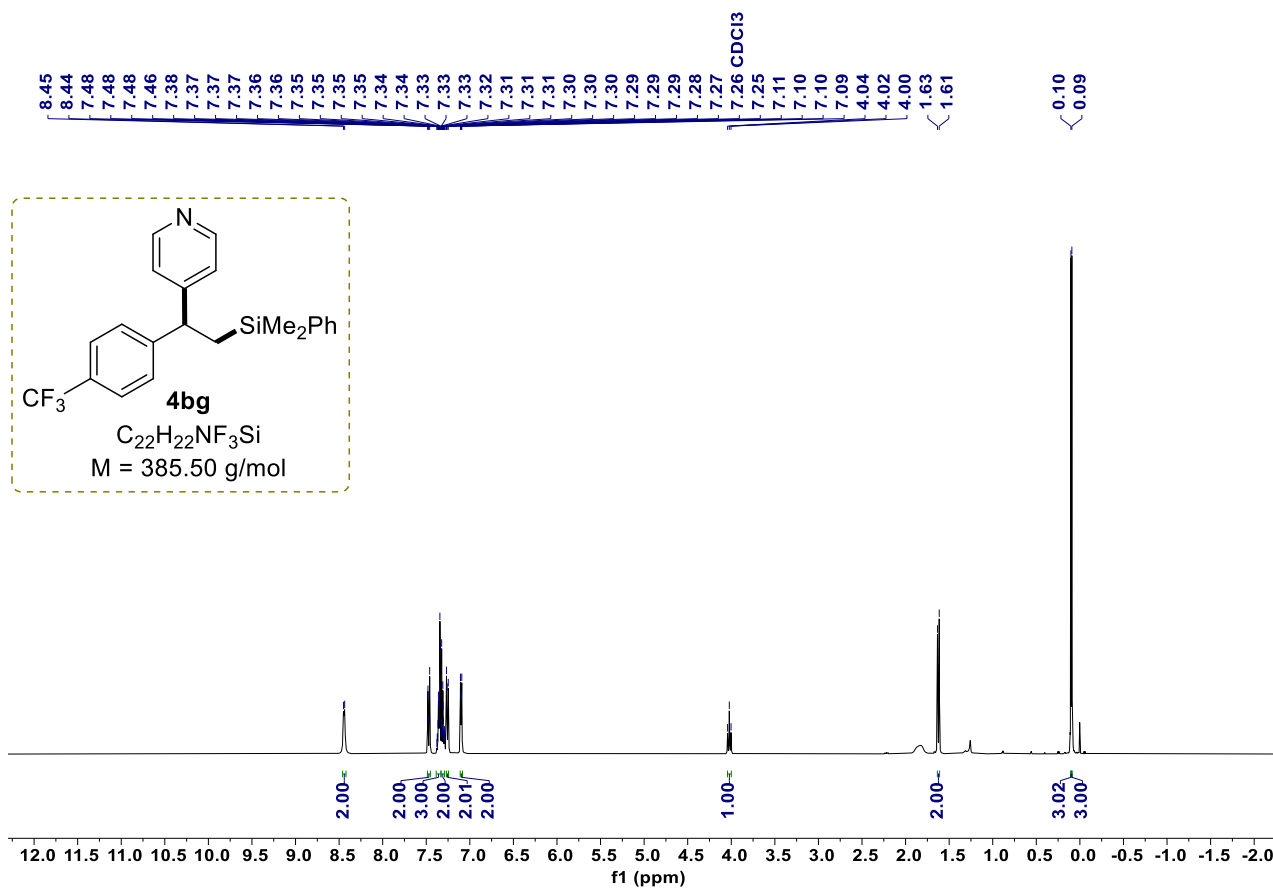

$^1H$  NMR spectrum (400 MHz,  $CDCl_3$ ) of compound **4bg**.

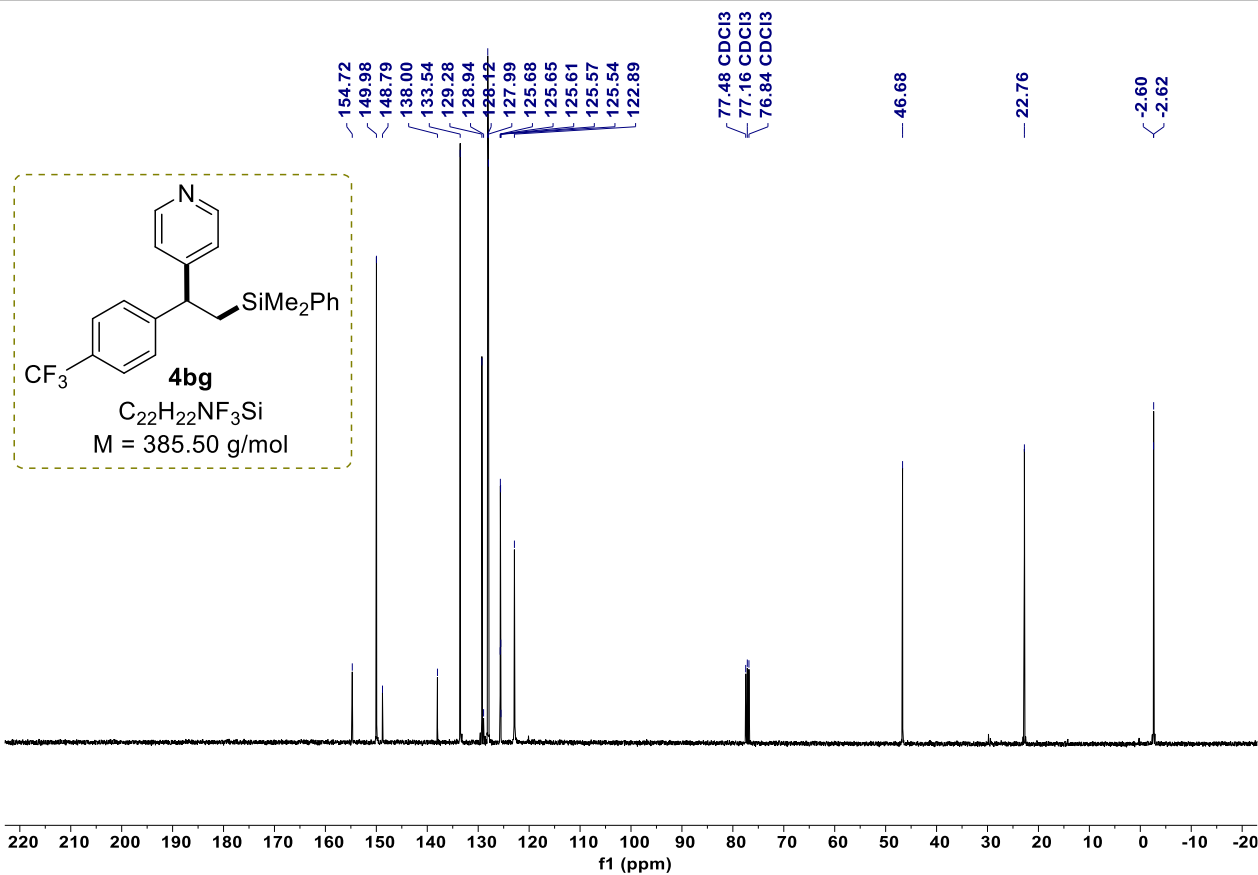

$^{13}C\{^1H\}$  NMR spectrum (100 MHz,  $CDCl_3$ ) of compound **4bg**.

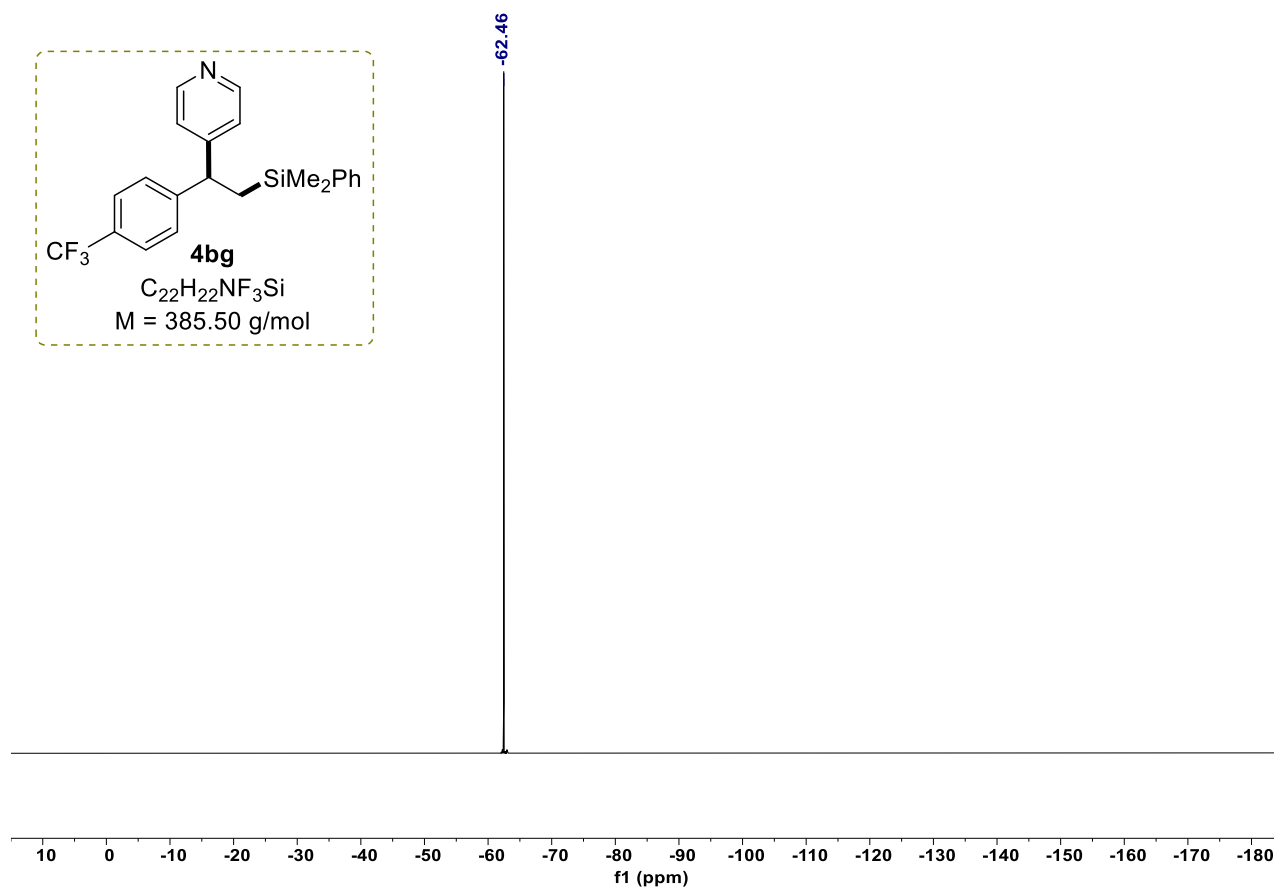

$^{19}F$  NMR (376 MHz,  $CDCl_3$ ) of compound **4bg**.



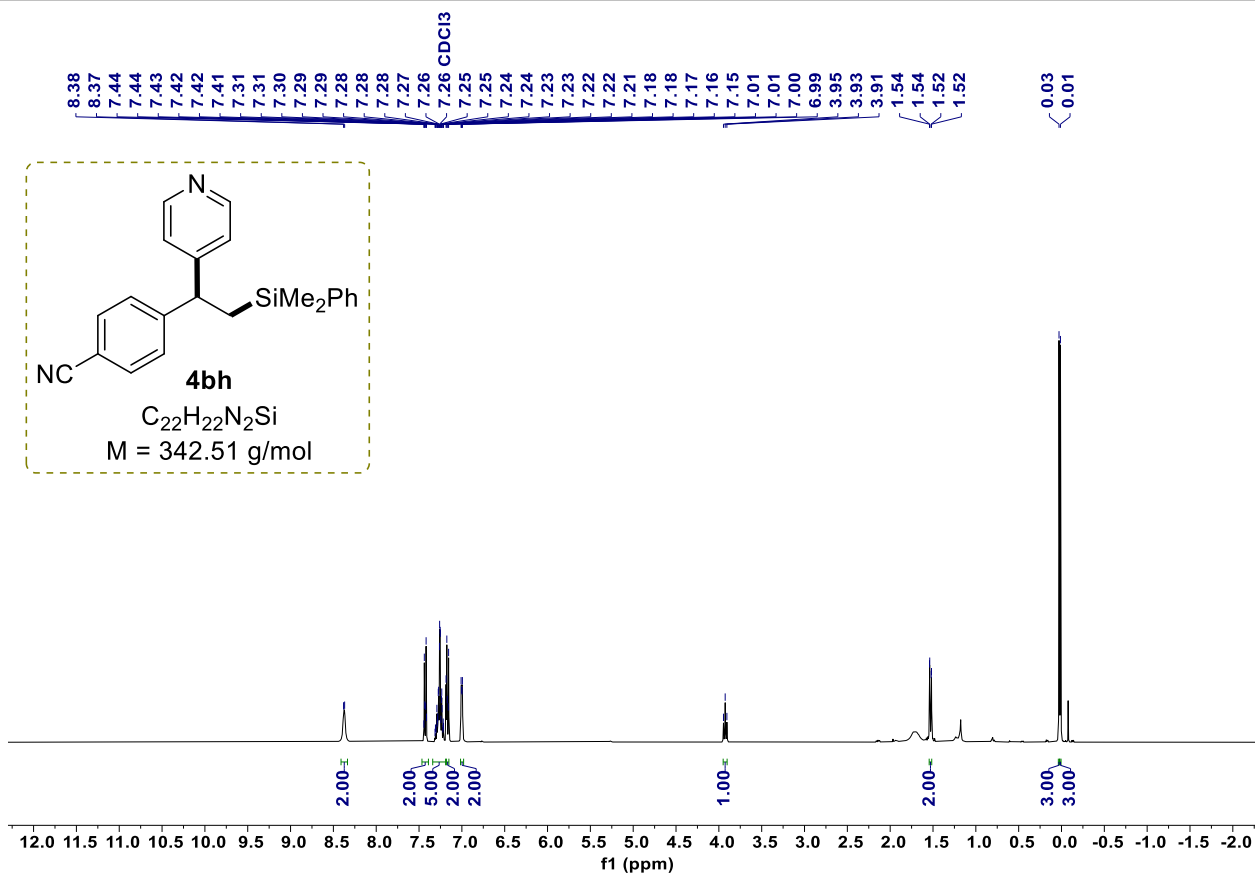

$^1H$  NMR spectrum (400 MHz,  $CDCl_3$ ) of compound **4bh**.

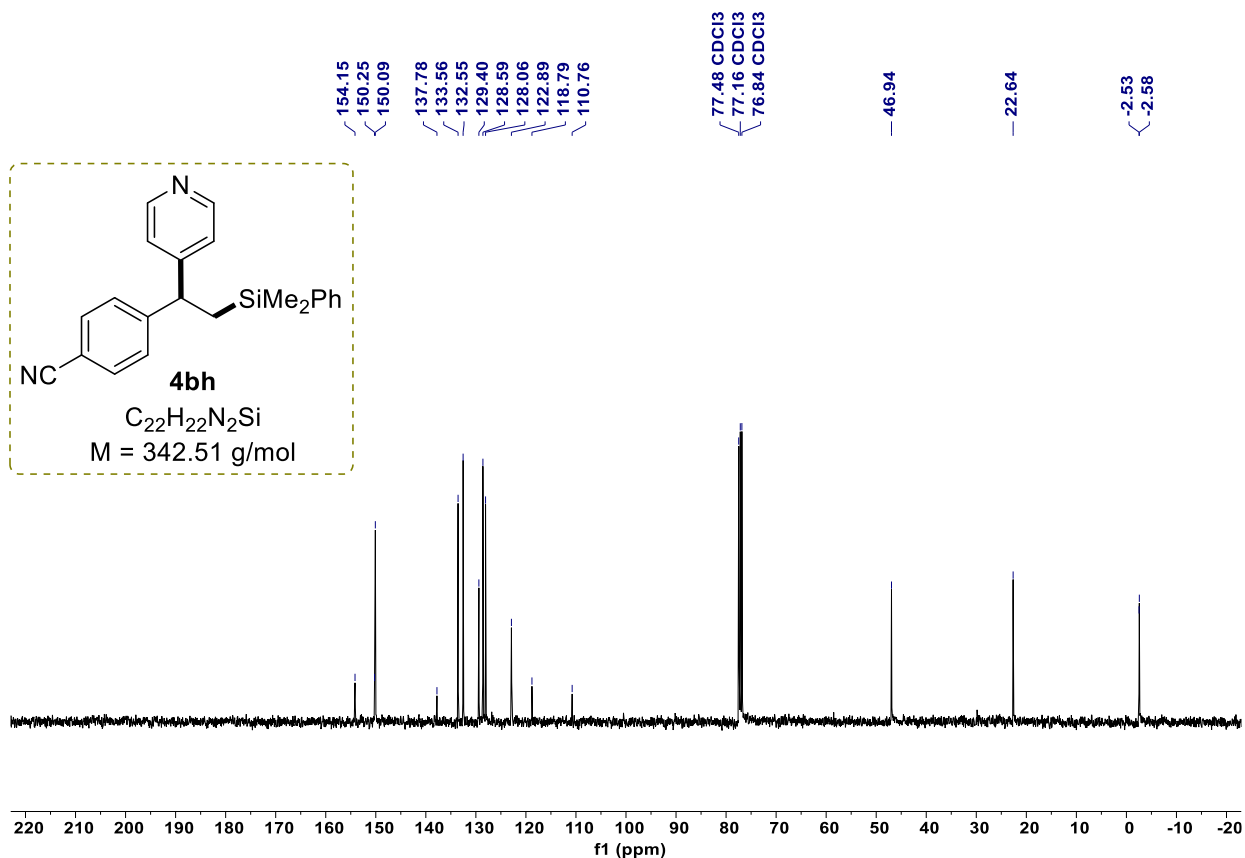

$^{13}C$  NMR spectrum (100 MHz,  $CDCl_3$ ) of compound **4bh**.

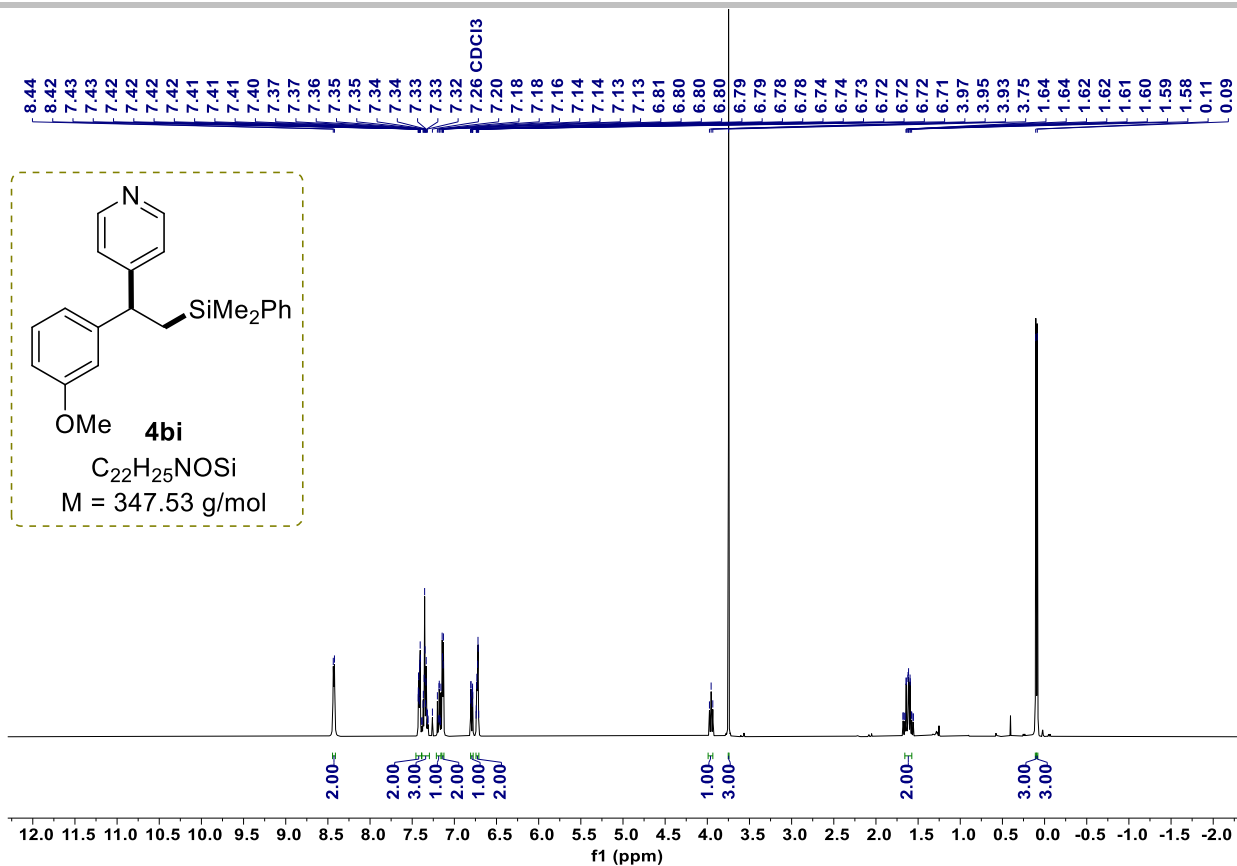

$^1H$  NMR spectrum (400 MHz,  $CDCl_3$ ) of compound **4bi**.

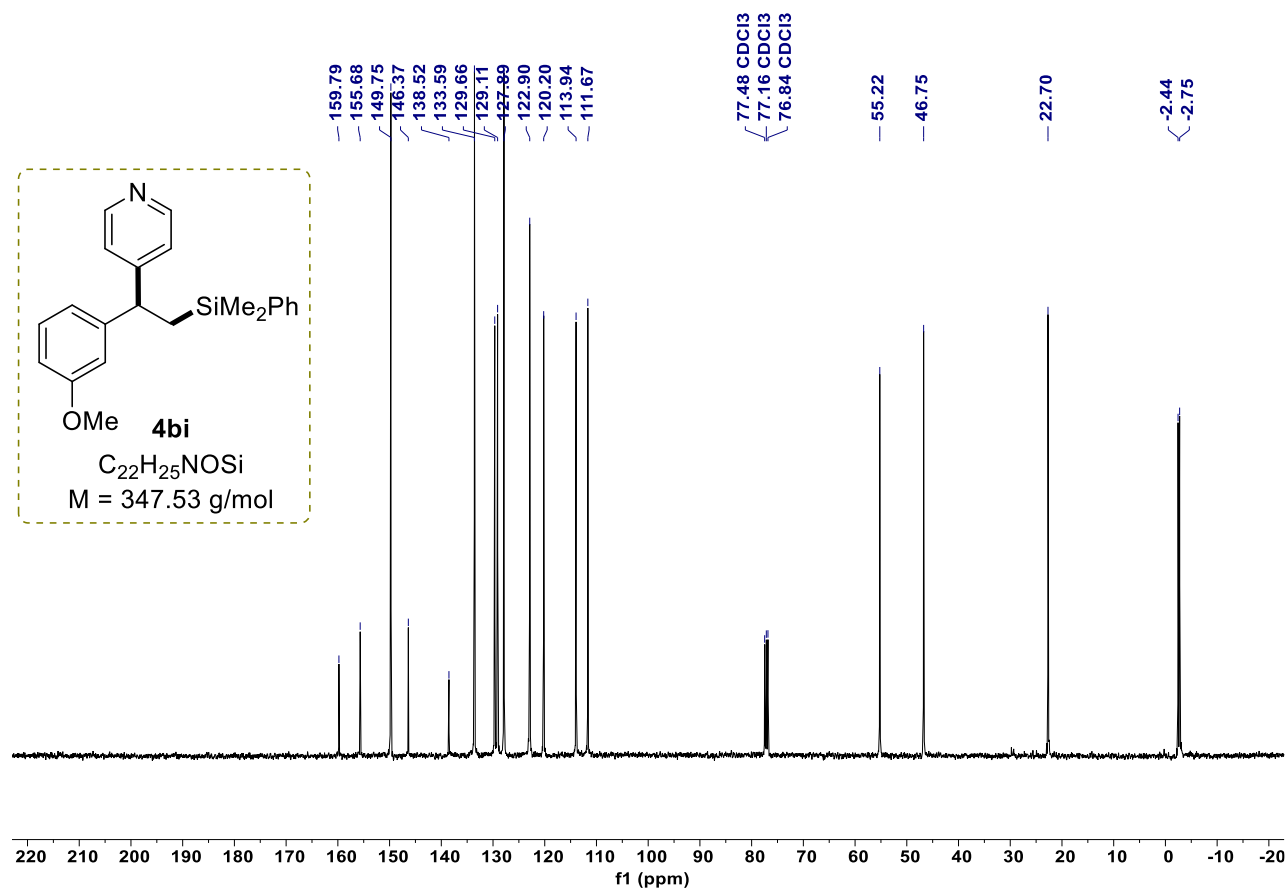

$^{13}C$  NMR spectrum (100 MHz,  $CDCl_3$ ) of compound **4bi**.

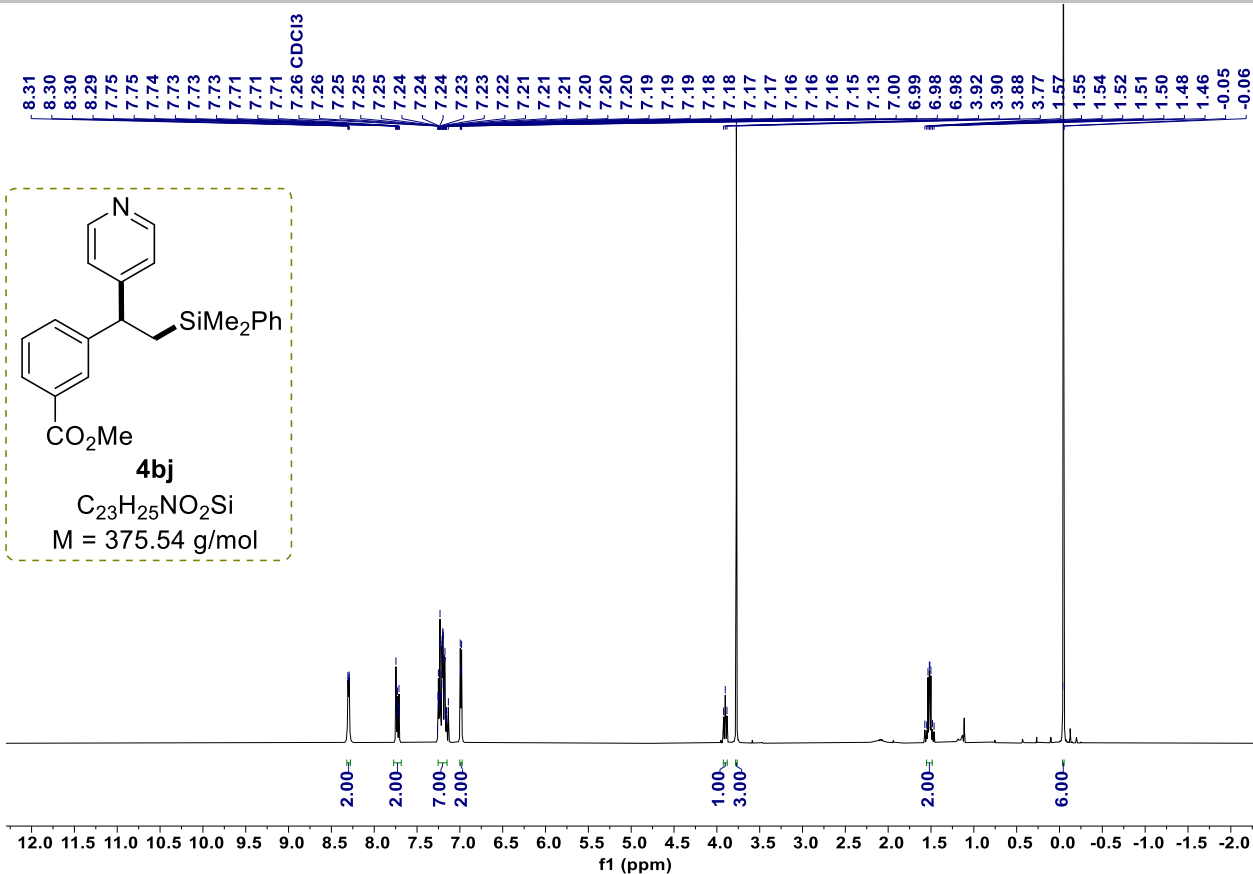

$^1H$  NMR spectrum (400 MHz,  $CDCl_3$ ) of compound **4bj**.

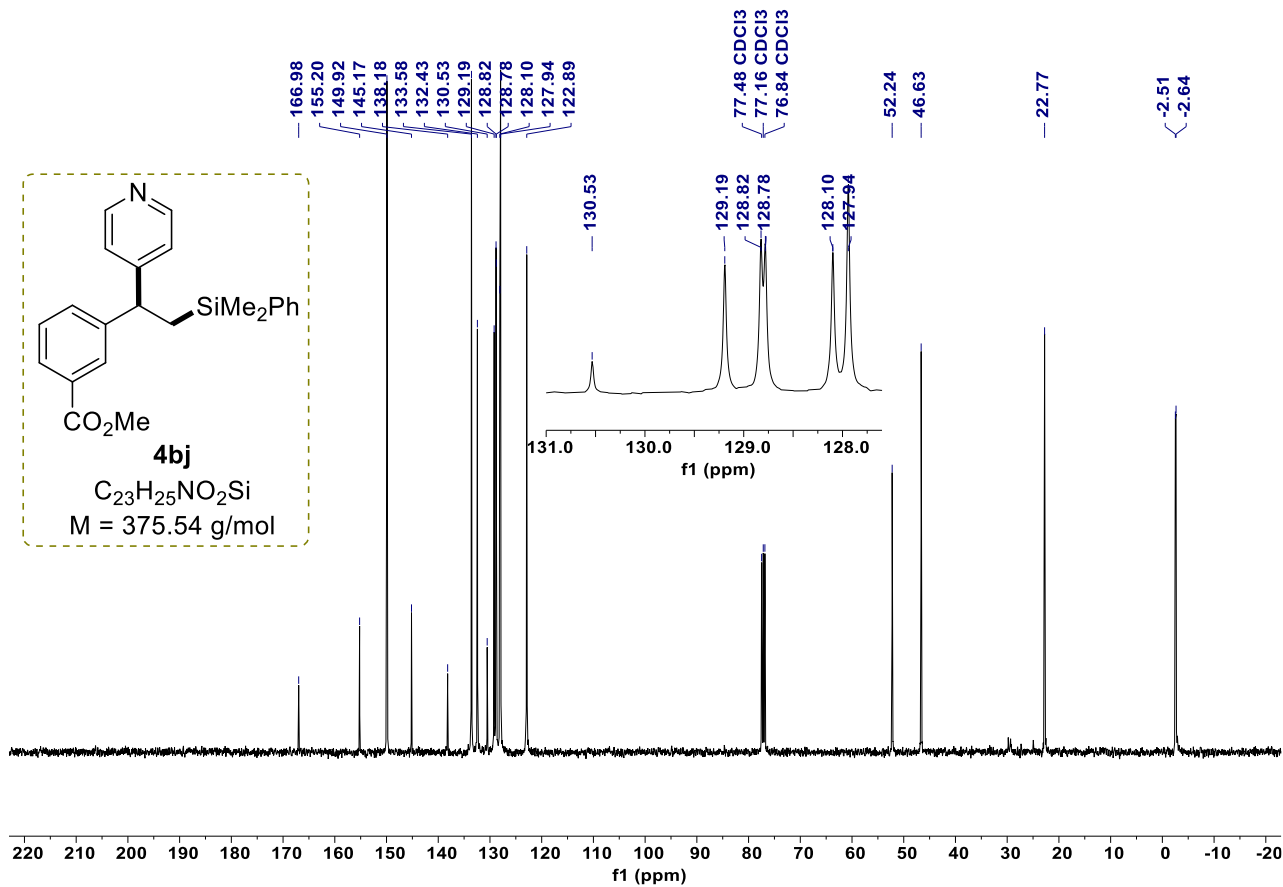

$^{13}C$  NMR spectrum (100 MHz,  $CDCl_3$ ) of compound **4bj**.

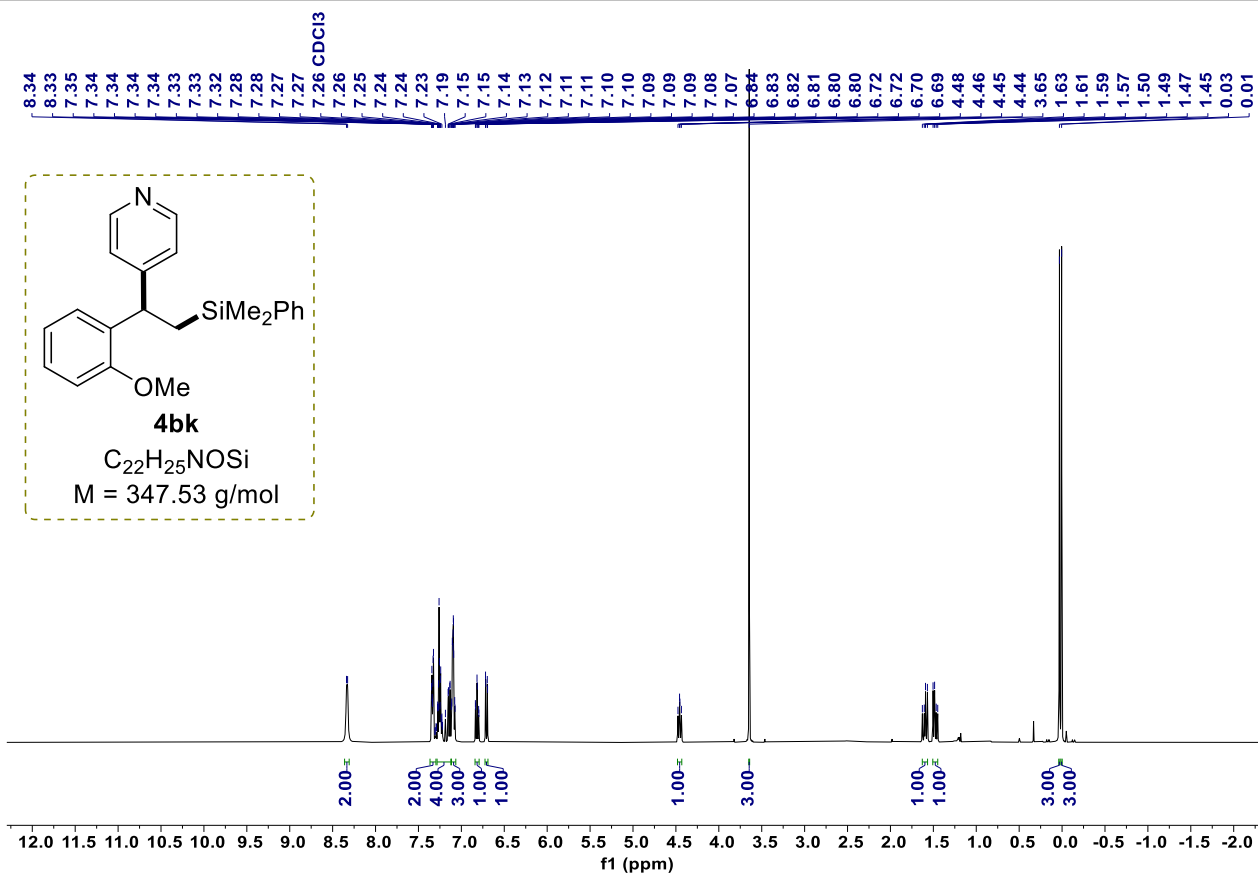

$^1\text{H NMR}$  spectrum (400 MHz,  $\text{CDCl}_3$ ) of compound **4bk**.

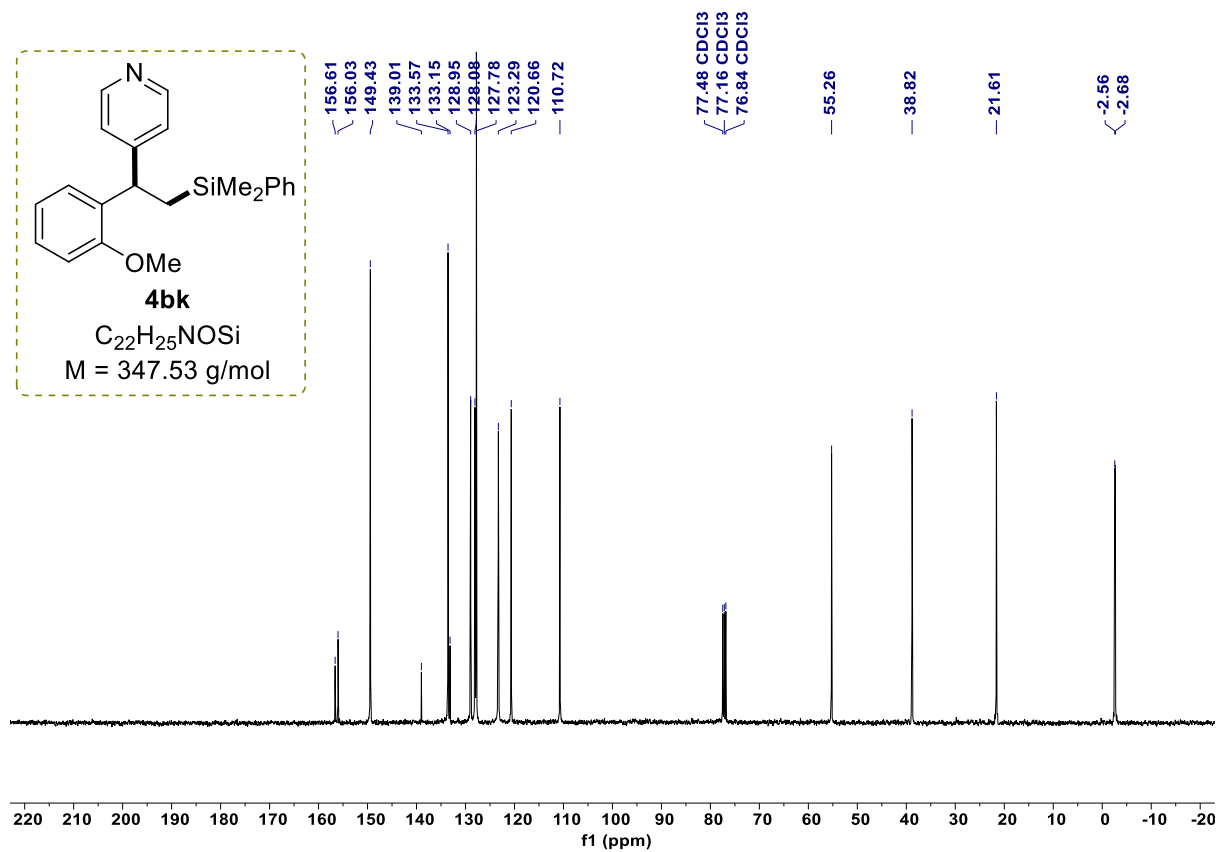

$^{13}\text{C}\{^1\text{H}\}$  NMR spectrum (100 MHz,  $\text{CDCl}_3$ ) of compound **4bk**.

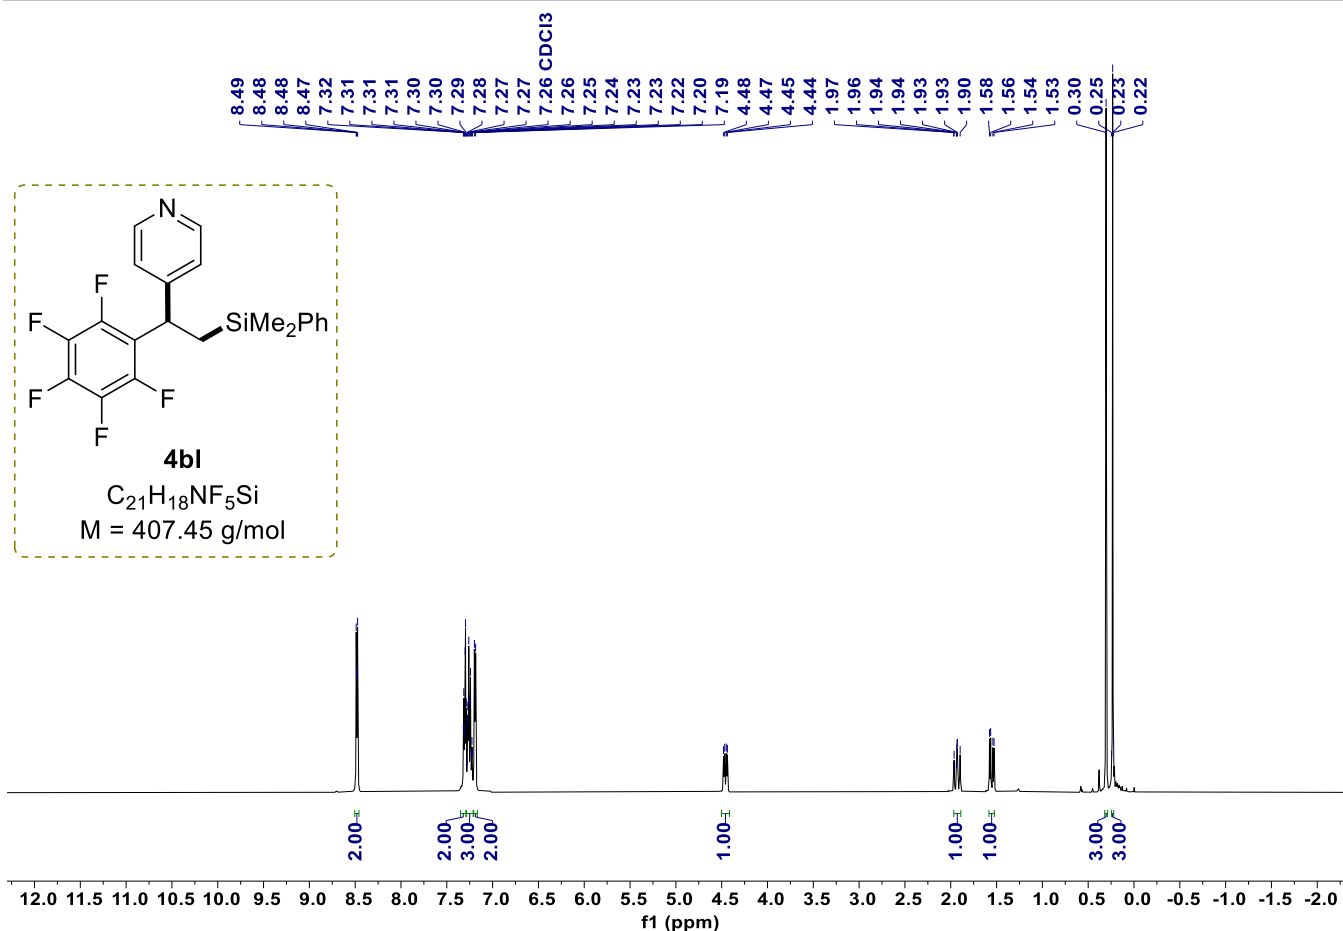

$^1H$  NMR spectrum (400 MHz,  $CDCl_3$ ) of compound **4bl**.

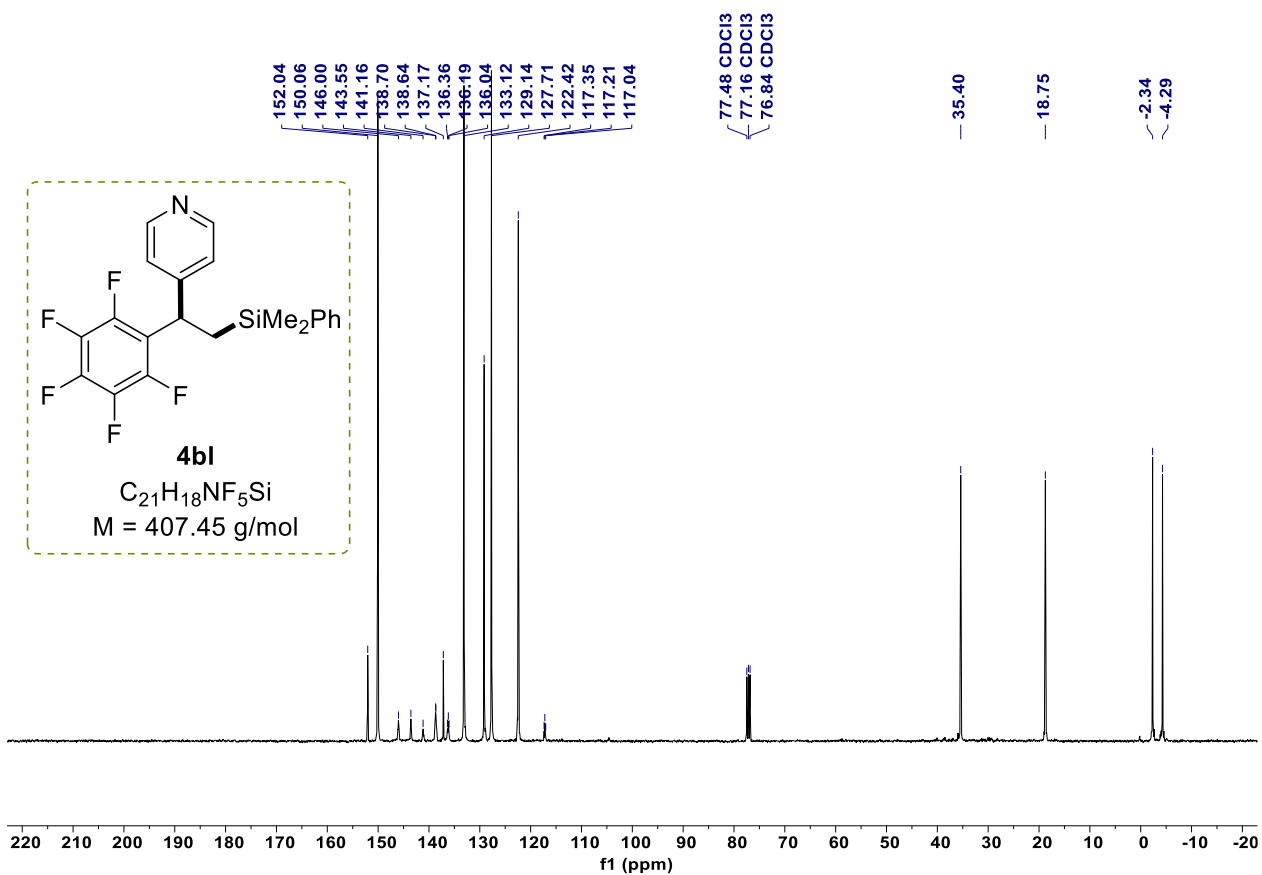

$^{13}C\{^1H\}$  NMR spectrum (100 MHz,  $CDCl_3$ ) of compound **4bl**.

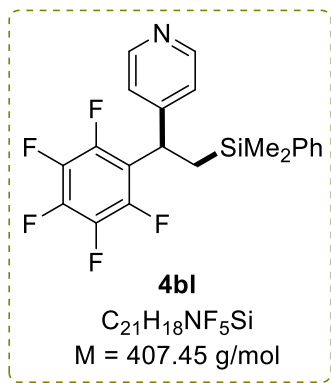

-141.30  
 -141.31  
 -141.33  
 -141.37  
 -141.38  
 -141.39  
 -156.27  
 -156.33  
 -156.39  
 -161.79  
 -161.81  
 -161.85  
 -161.87  
 -161.91  
 -161.93

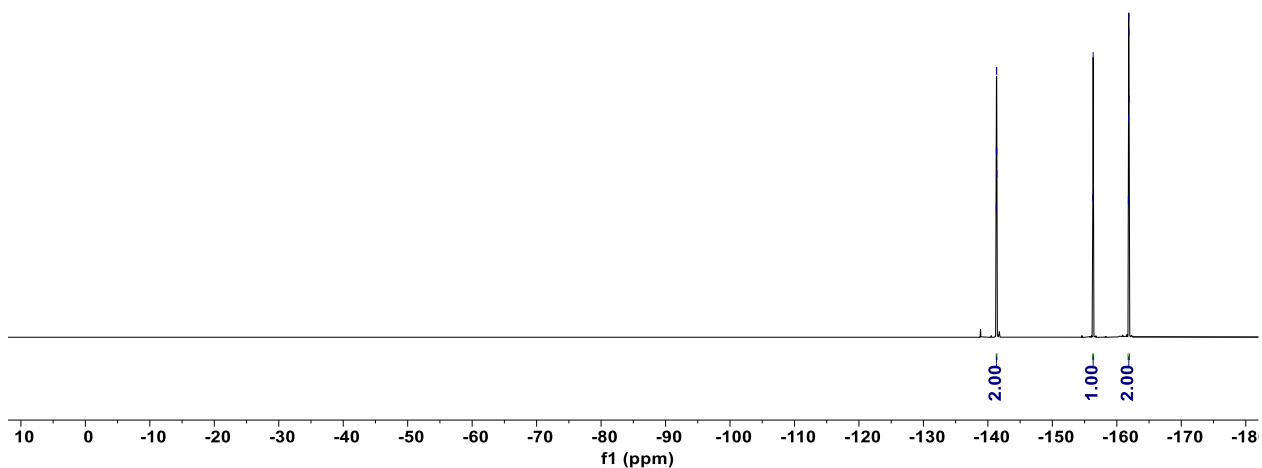

$^{19}F$  NMR (376 MHz,  $CDCl_3$ ) of compound **4bl**.

8.37  
 8.36  
 7.36  
 7.36  
 7.36  
 7.35  
 7.34  
 7.34  
 7.31  
 7.31  
 7.30  
 7.30  
 7.29  
 7.29  
 7.28  
 7.28  
 7.27  
 7.27  
 7.26  
 7.21  
 7.21  
 7.08  
 7.08  
 7.07  
 7.07  
 7.06  
 7.06  
 7.05  
 7.03  
 7.03  
 7.02  
 7.01  
 7.01  
 5.92  
 5.86  
 5.03  
 5.02  
 5.02  
 5.02  
 5.00  
 4.99  
 4.99  
 4.99  
 4.98  
 4.98  
 3.93  
 3.91  
 3.89  
 3.30  
 3.30  
 3.29  
 3.28  
 3.28  
 3.28  
 3.28  
 1.62  
 1.58  
 1.56  
 1.56  
 1.54  
 1.52  
 0.03  
 0.01

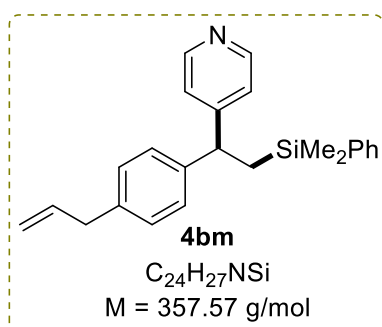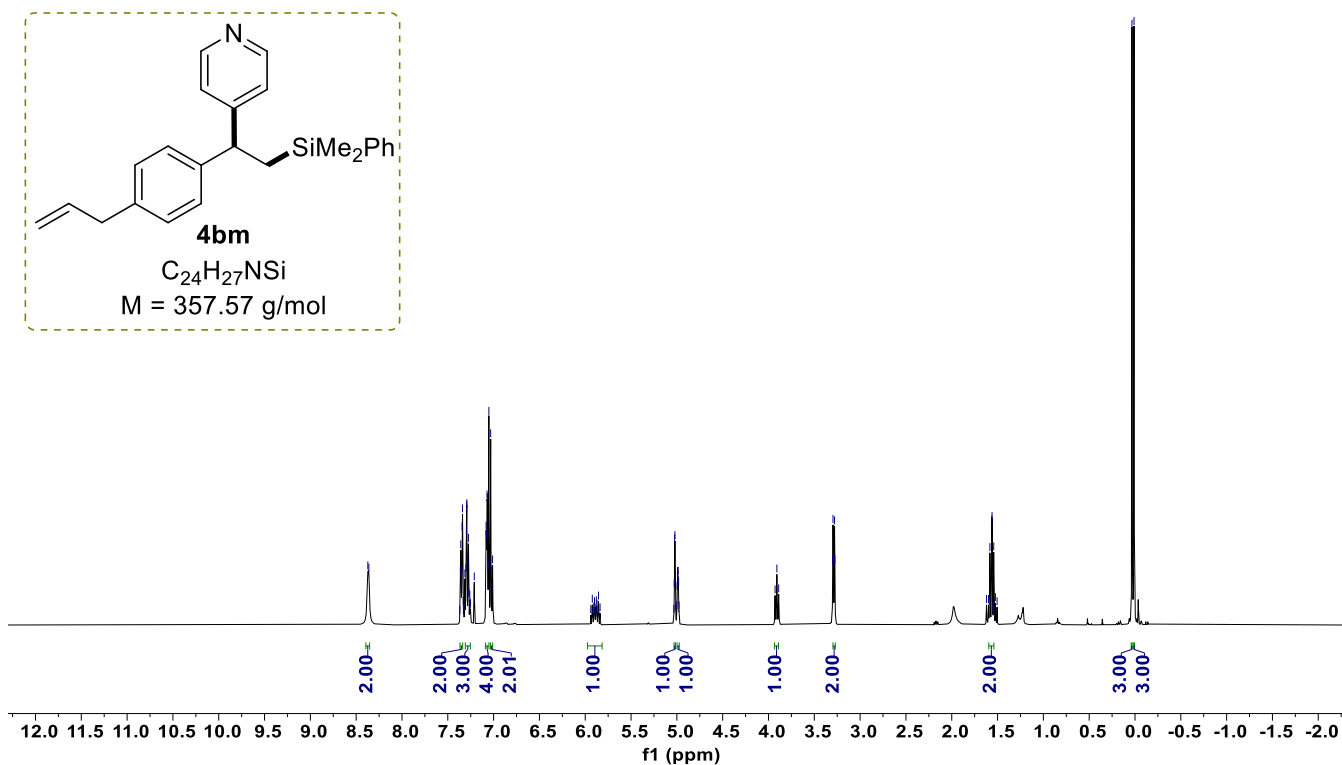

$^1H$  NMR spectrum (400 MHz,  $CDCl_3$ ) of compound **4bm**.

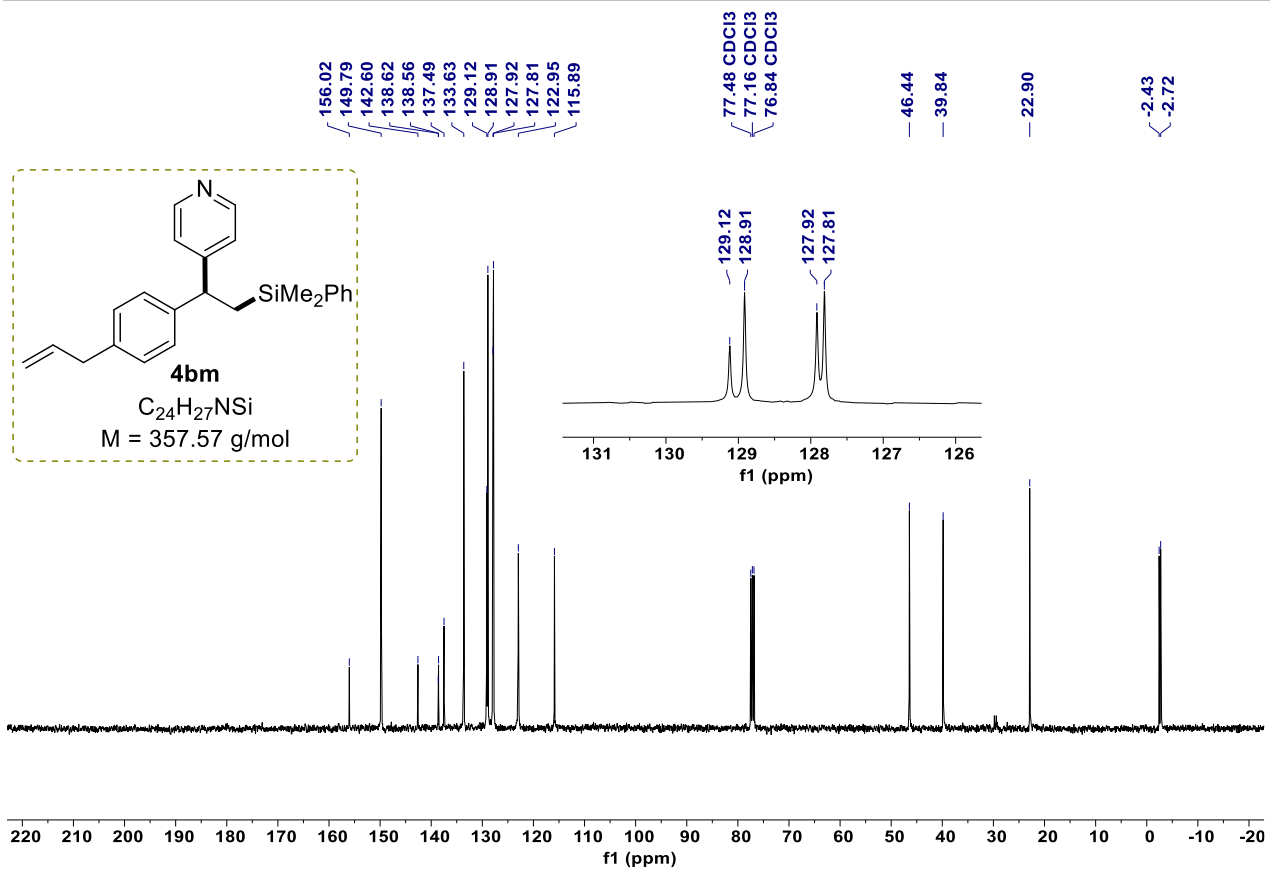

$^{13}C\{^1H\}$  NMR spectrum (100 MHz,  $CDCl_3$ ) of compound **4bm**.

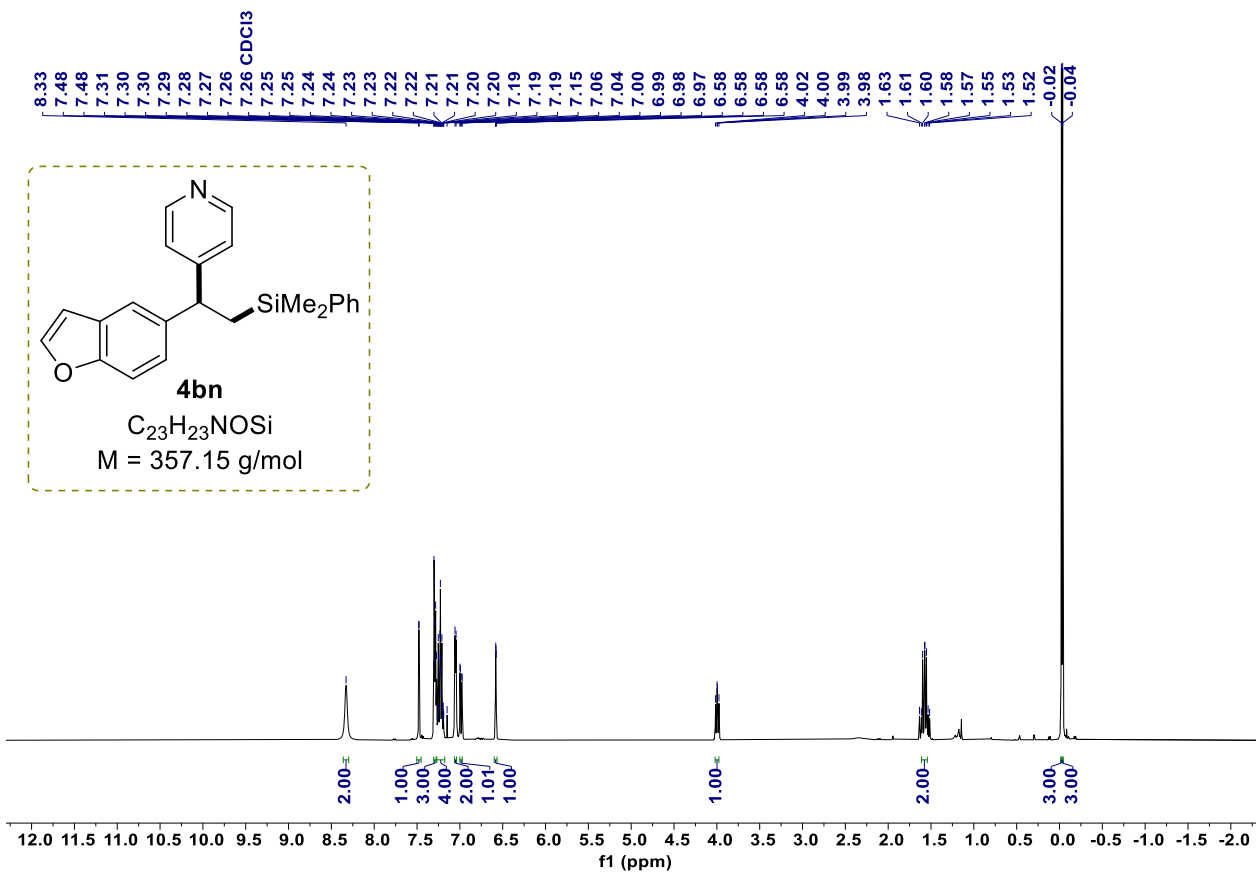

$^1H$  NMR spectrum (400 MHz,  $CDCl_3$ ) of compound **4bn**.

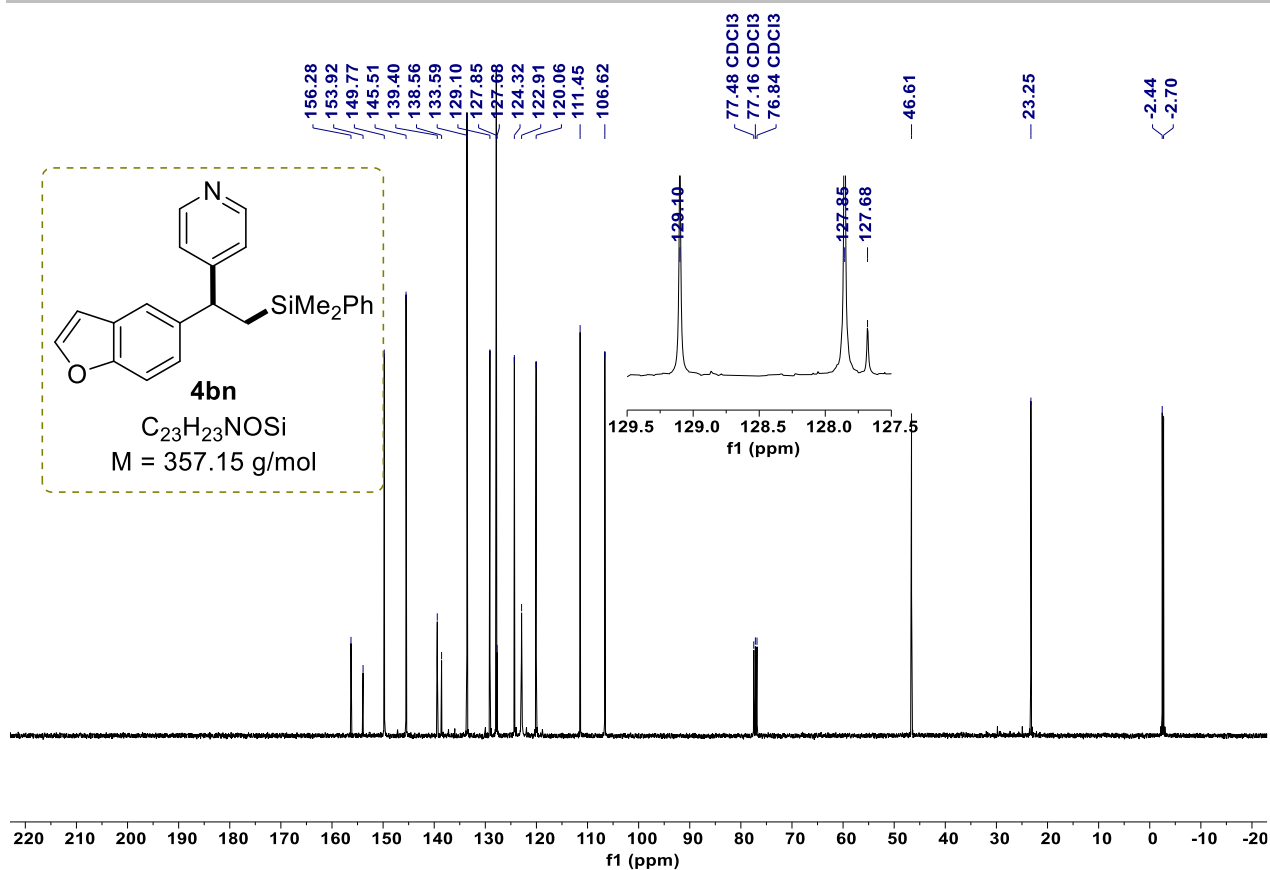

$^{13}C$  NMR spectrum (100 MHz,  $CDCl_3$ ) of compound **4bn**.

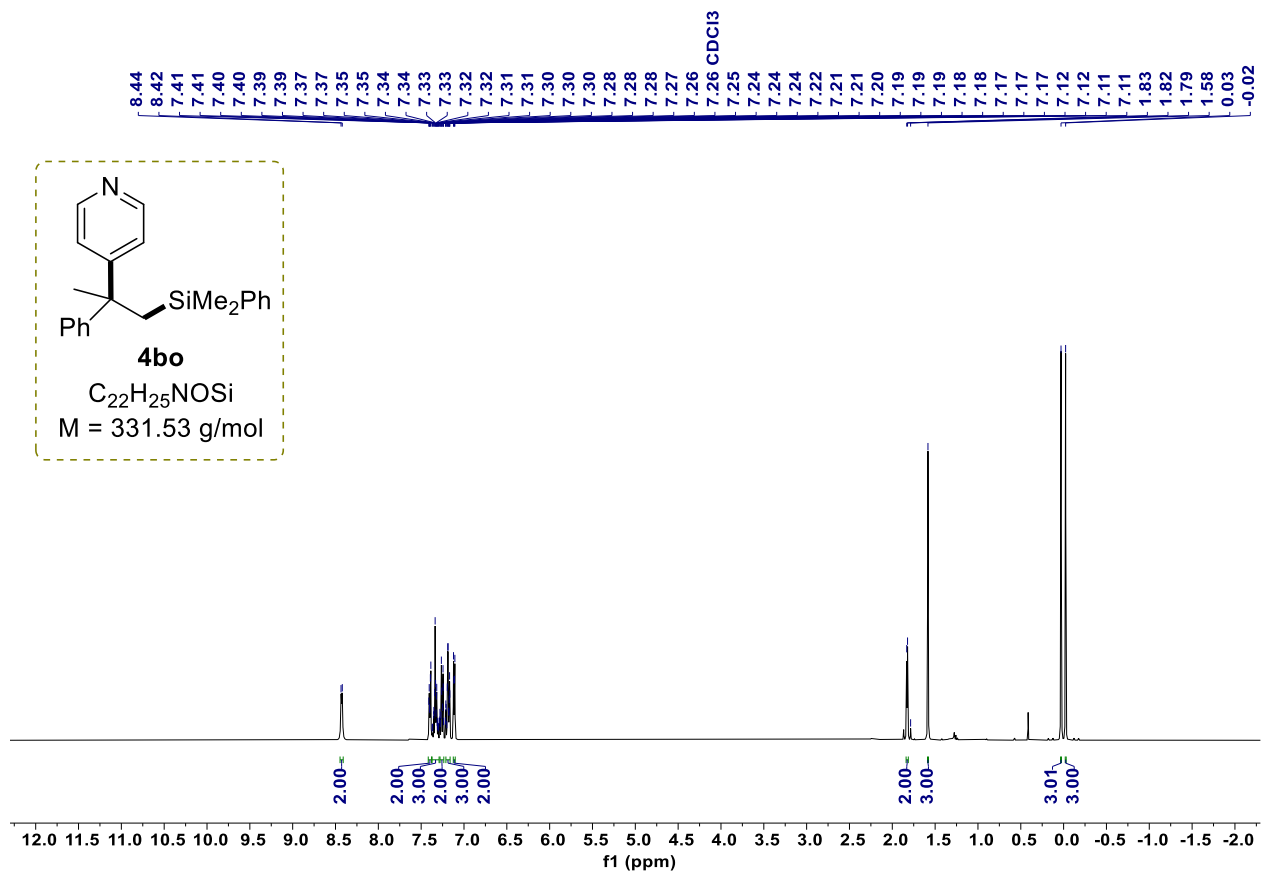

$^1H$  NMR spectrum (400 MHz,  $CDCl_3$ ) of compound **4bo**.



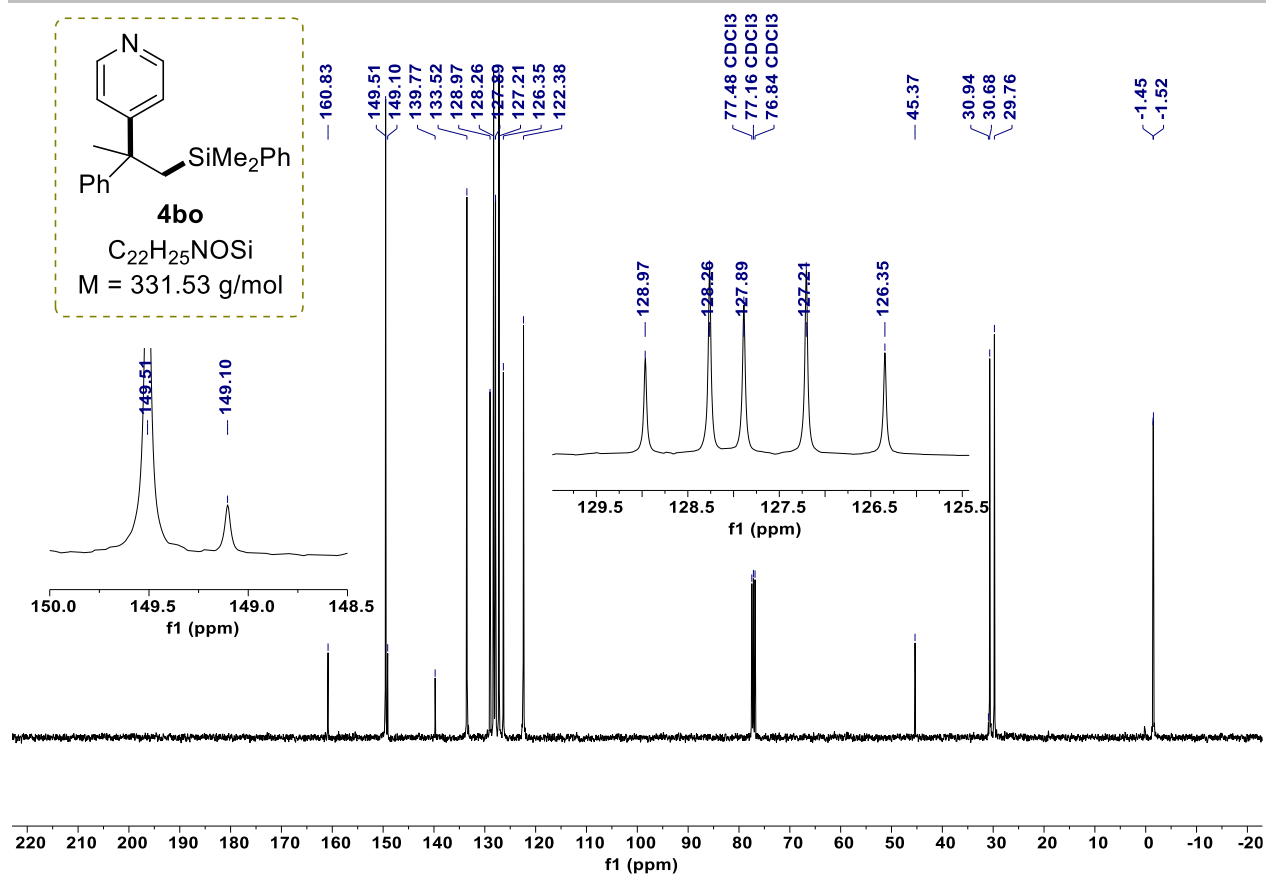

$^{13}C\{^1H\}$  NMR spectrum (100 MHz,  $CDCl_3$ ) of compound **4bo**.

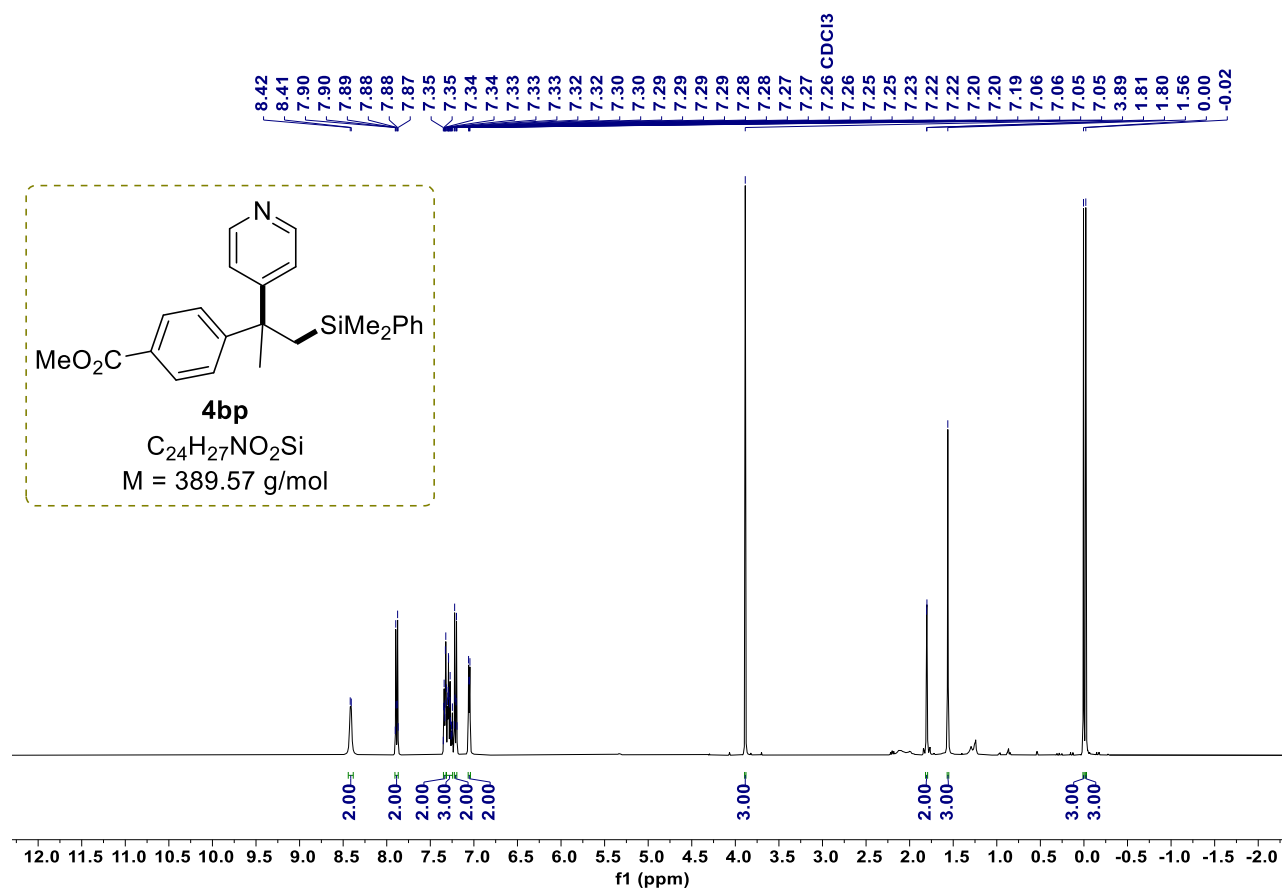

$^1H$  NMR spectrum (400 MHz,  $CDCl_3$ ) of compound **4bp**.

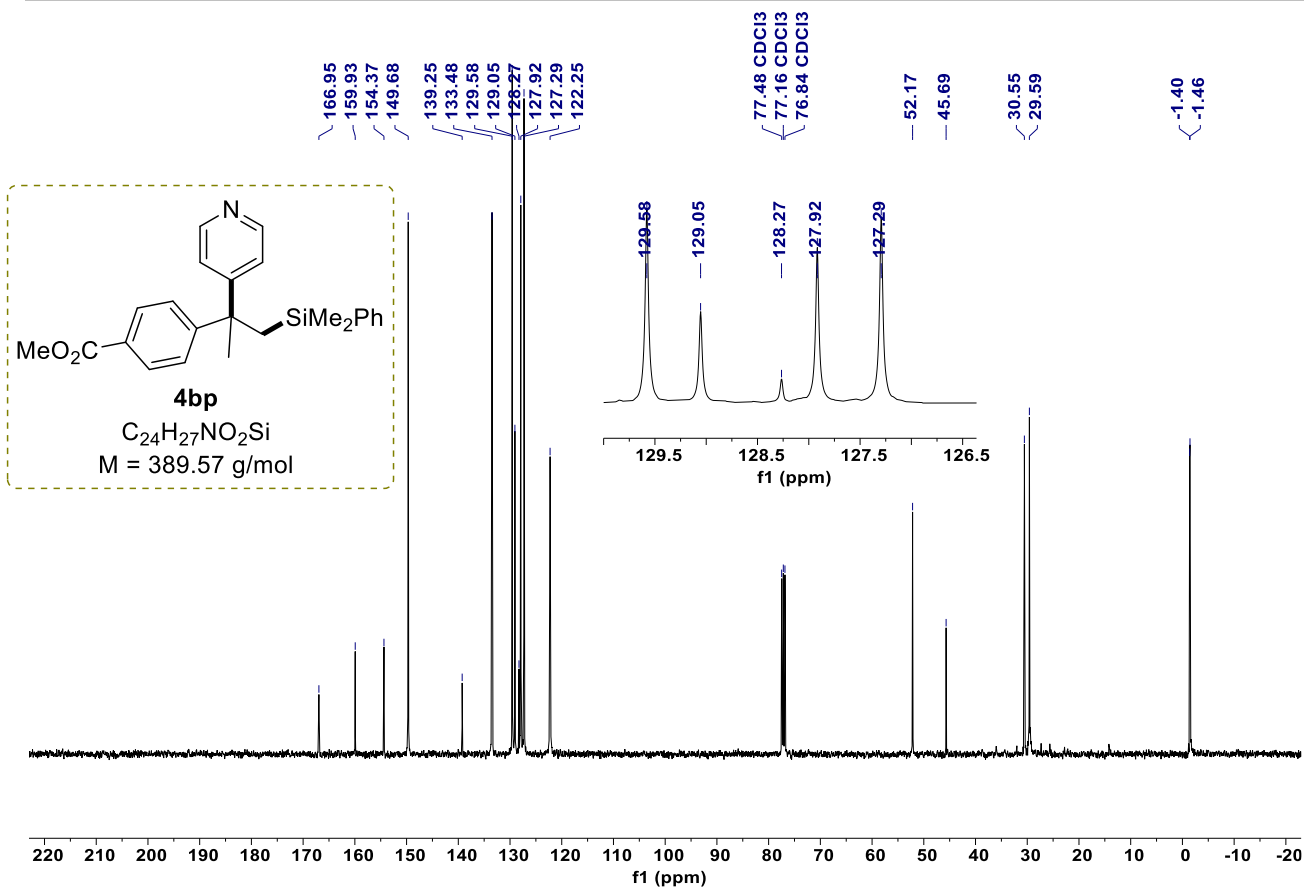

$^{13}C\{^1H\}$  NMR spectrum (100 MHz,  $CDCl_3$ ) of compound **4bp**.

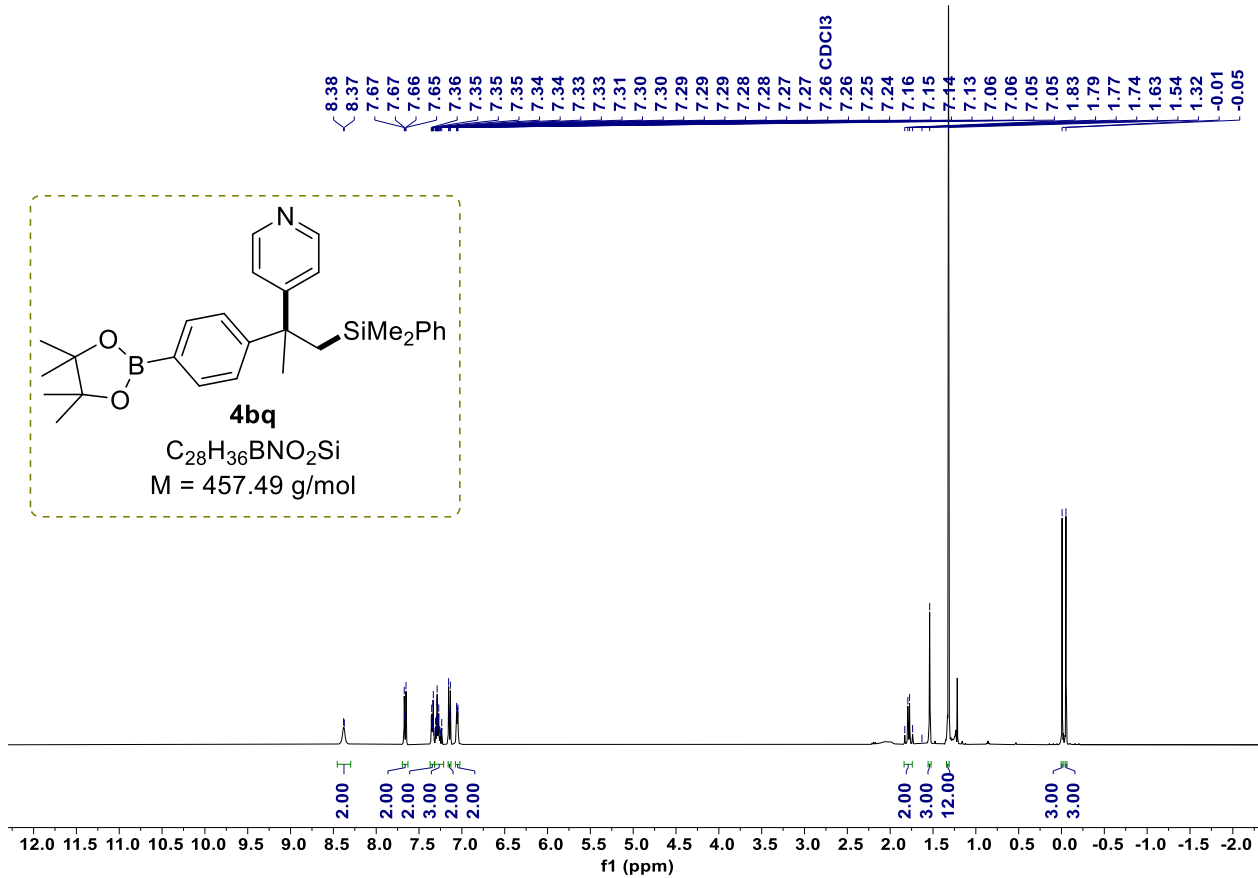

$^1H$  NMR spectrum (400 MHz,  $CDCl_3$ ) of compound **4bq**.

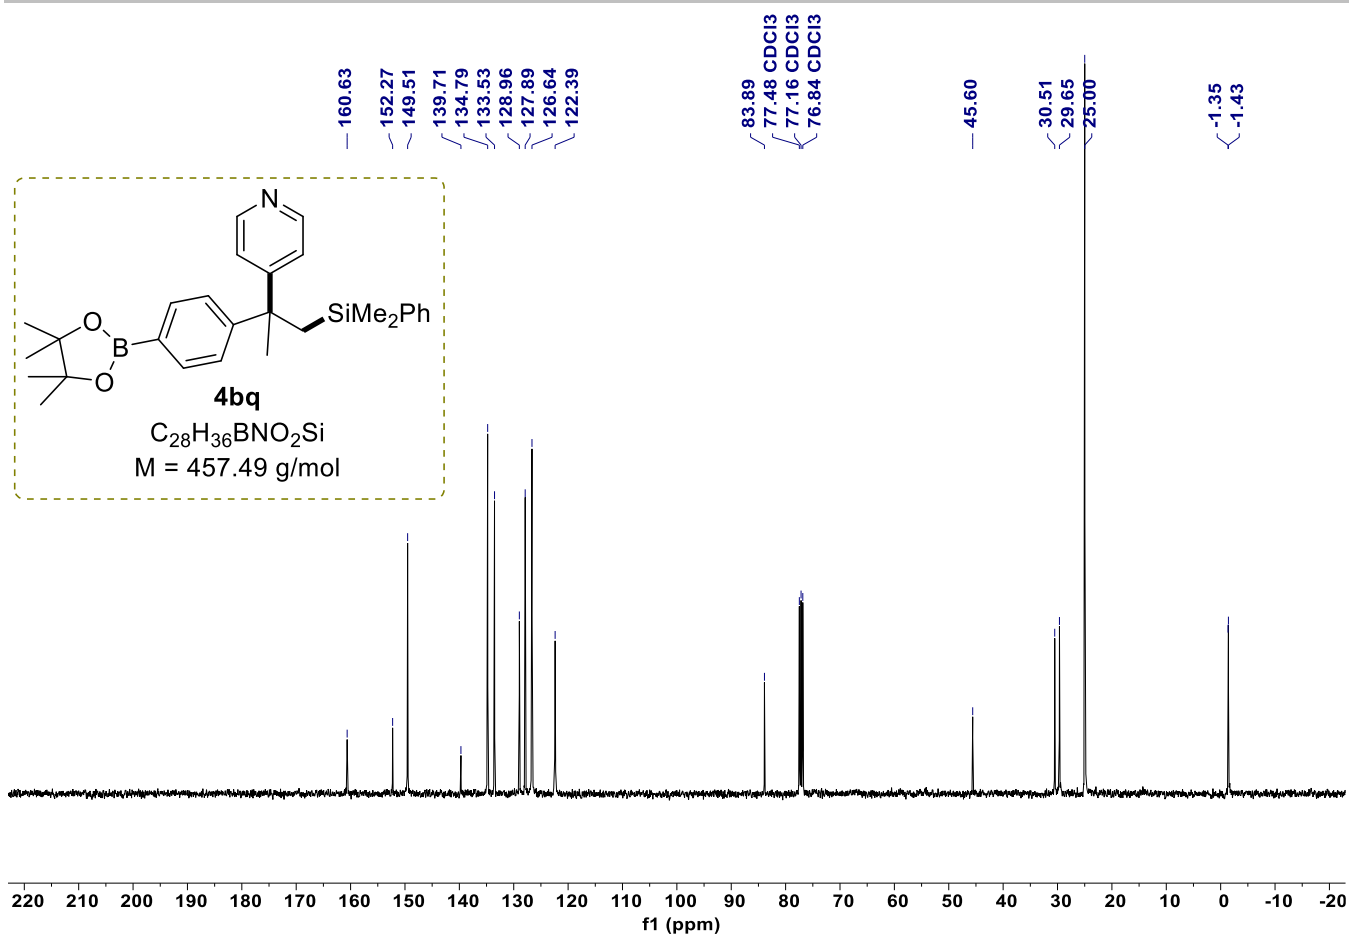

$^{13}C\{^1H\}$  NMR spectrum (100 MHz,  $CDCl_3$ ) of compound **4bq**.

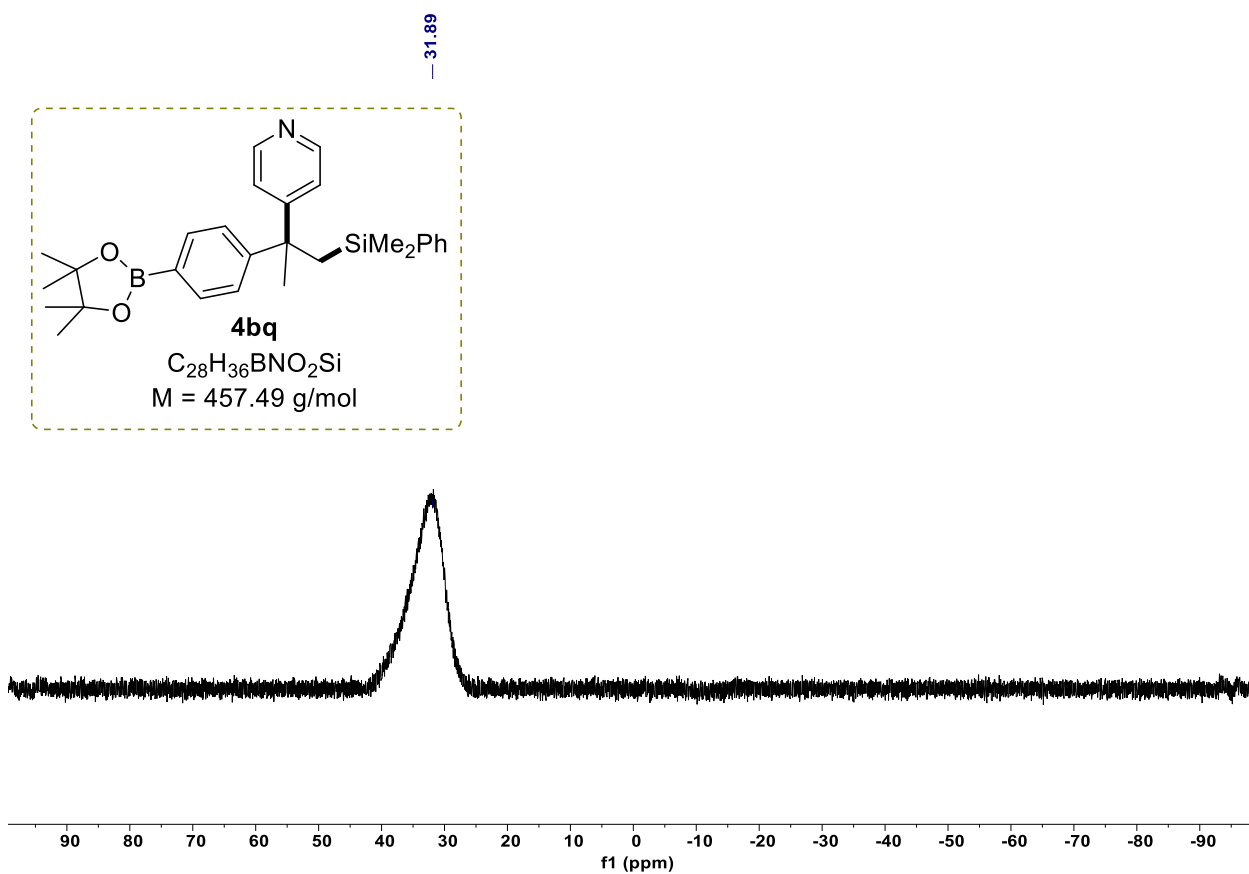

$^{11}B$  NMR spectrum (128 MHz,  $CDCl_3$ ) of compound **4bq**.

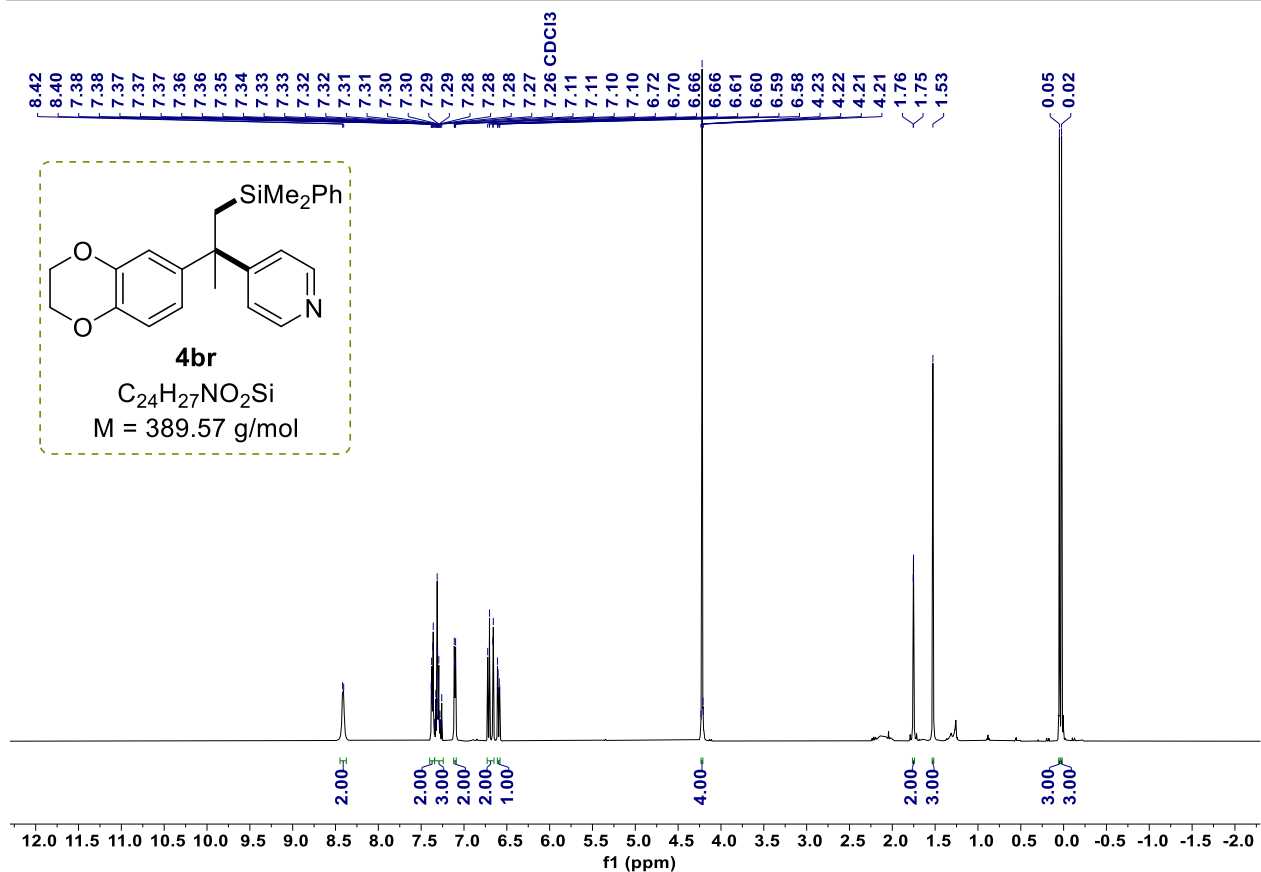

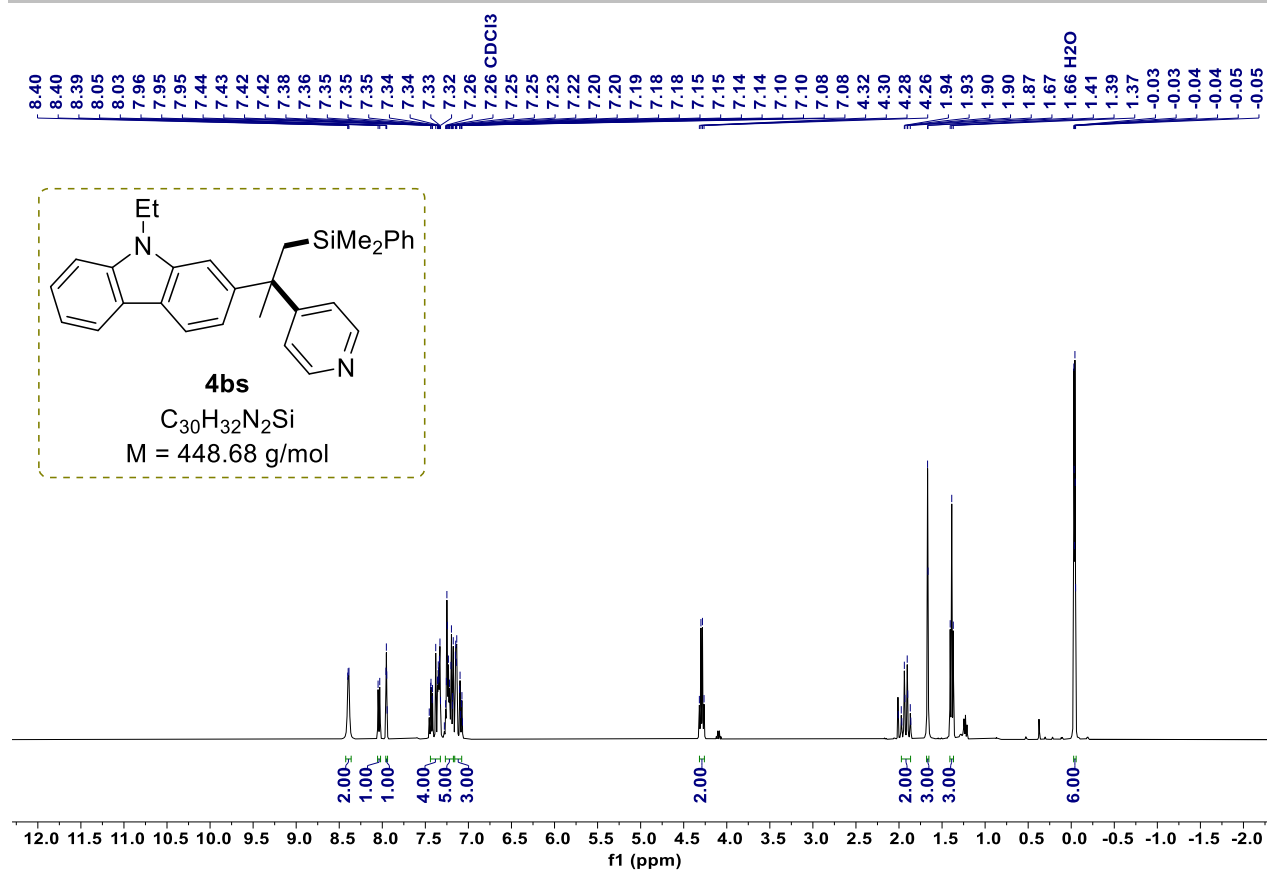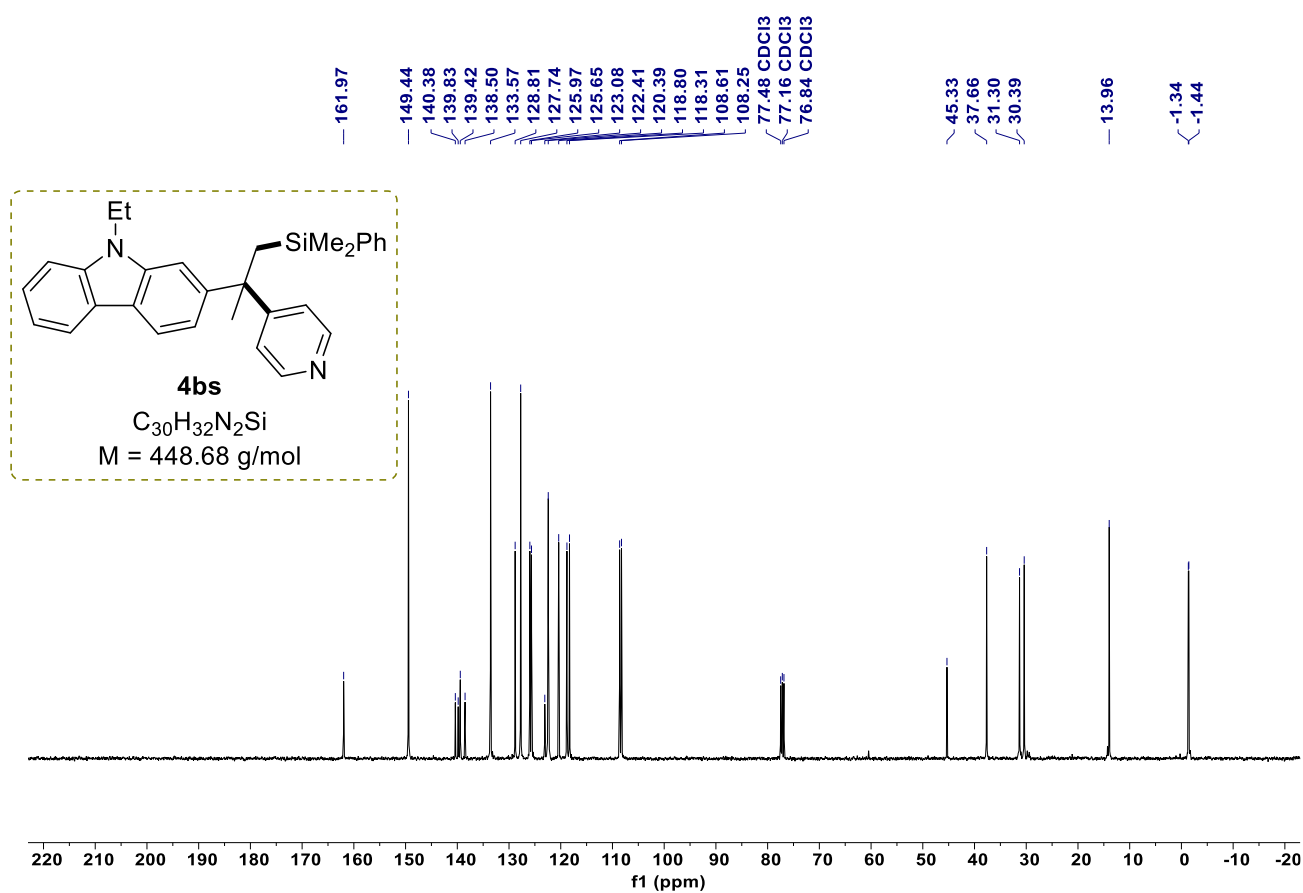

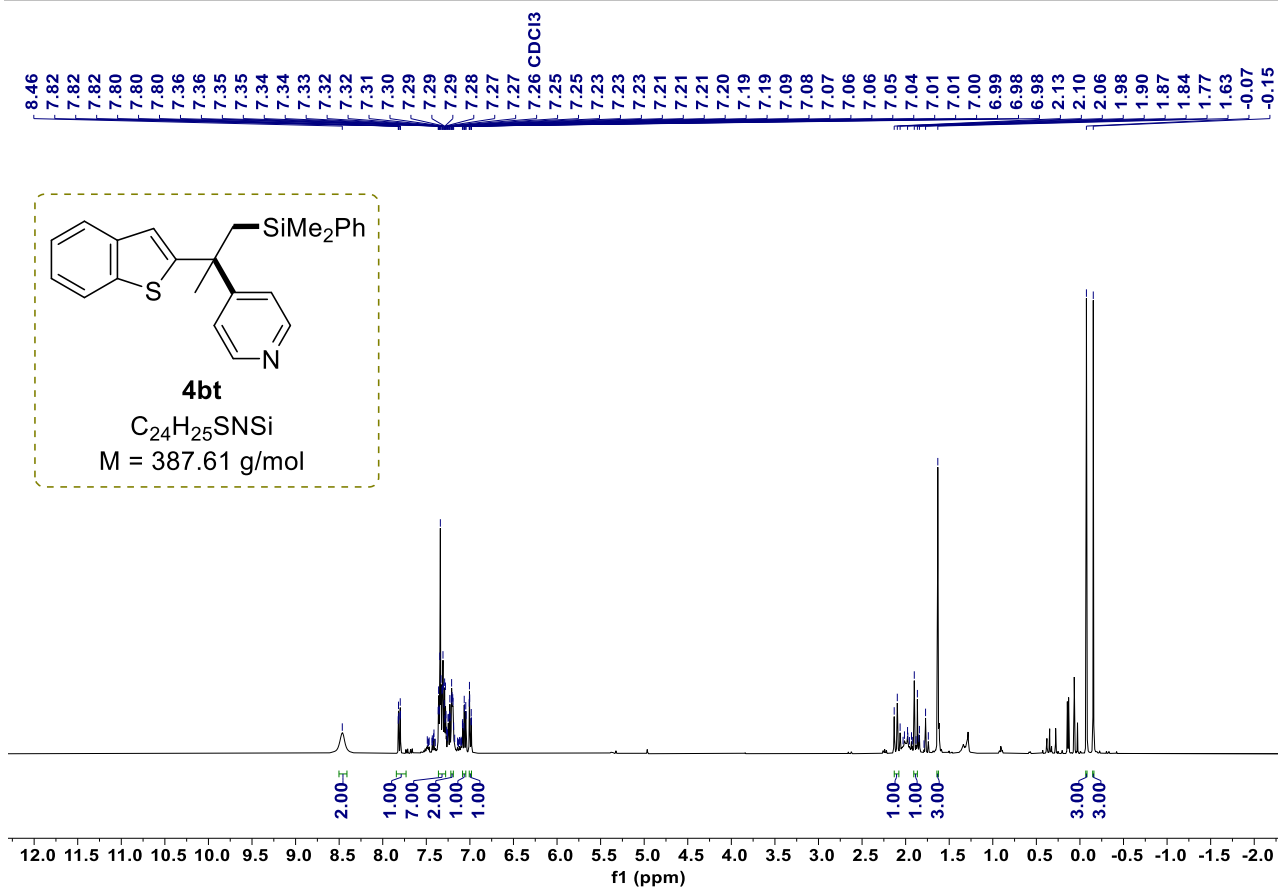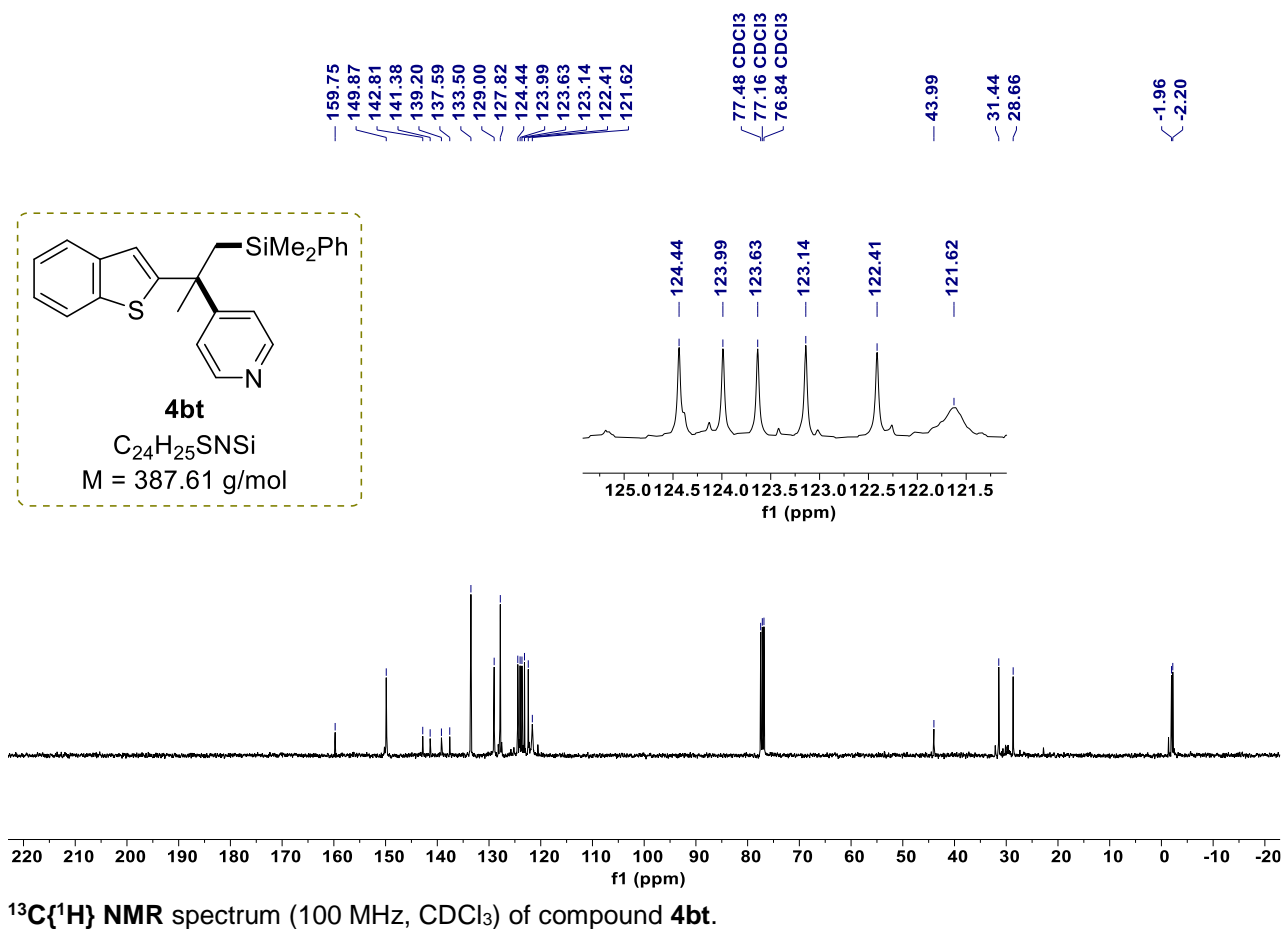

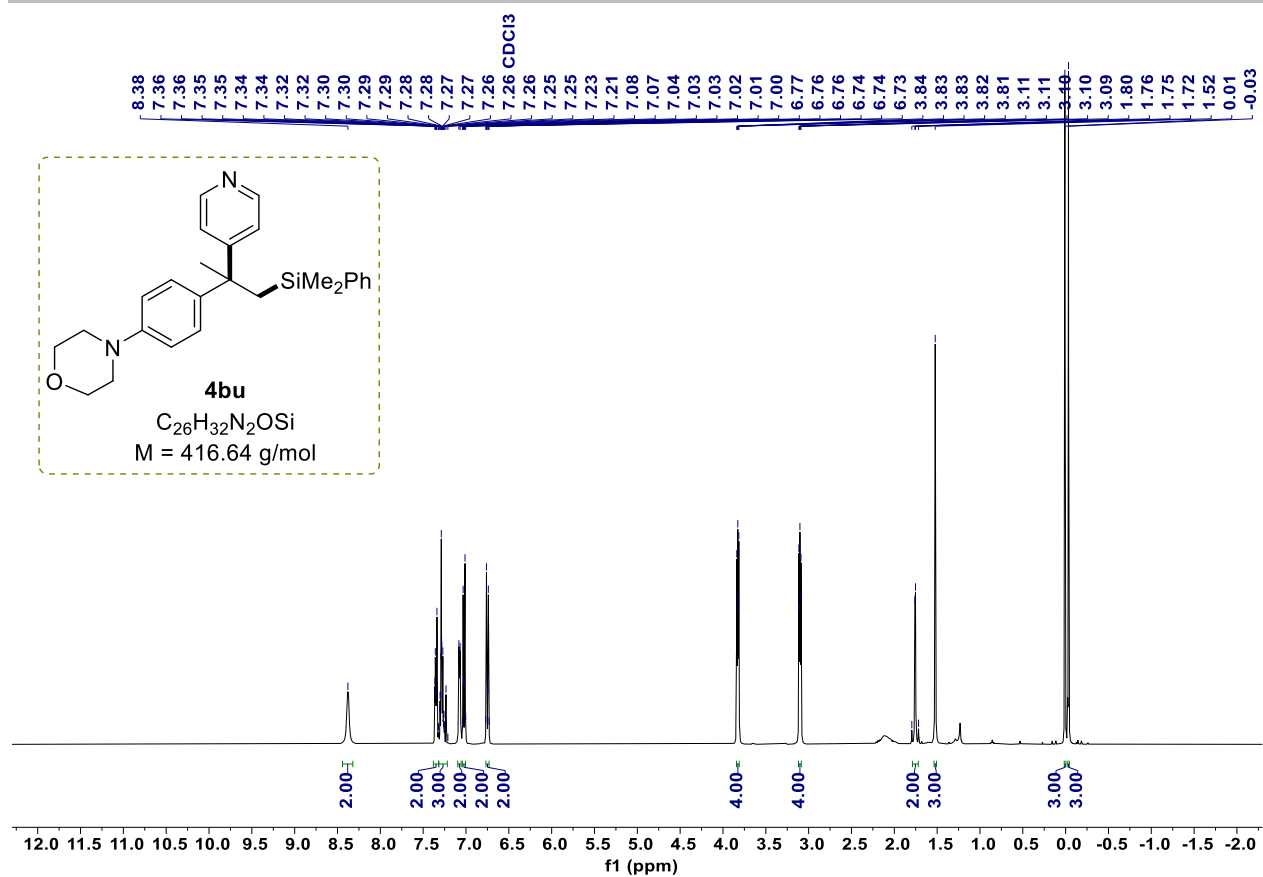

$^1H$  NMR spectrum (400 MHz,  $CDCl_3$ ) of compound **4bu**.

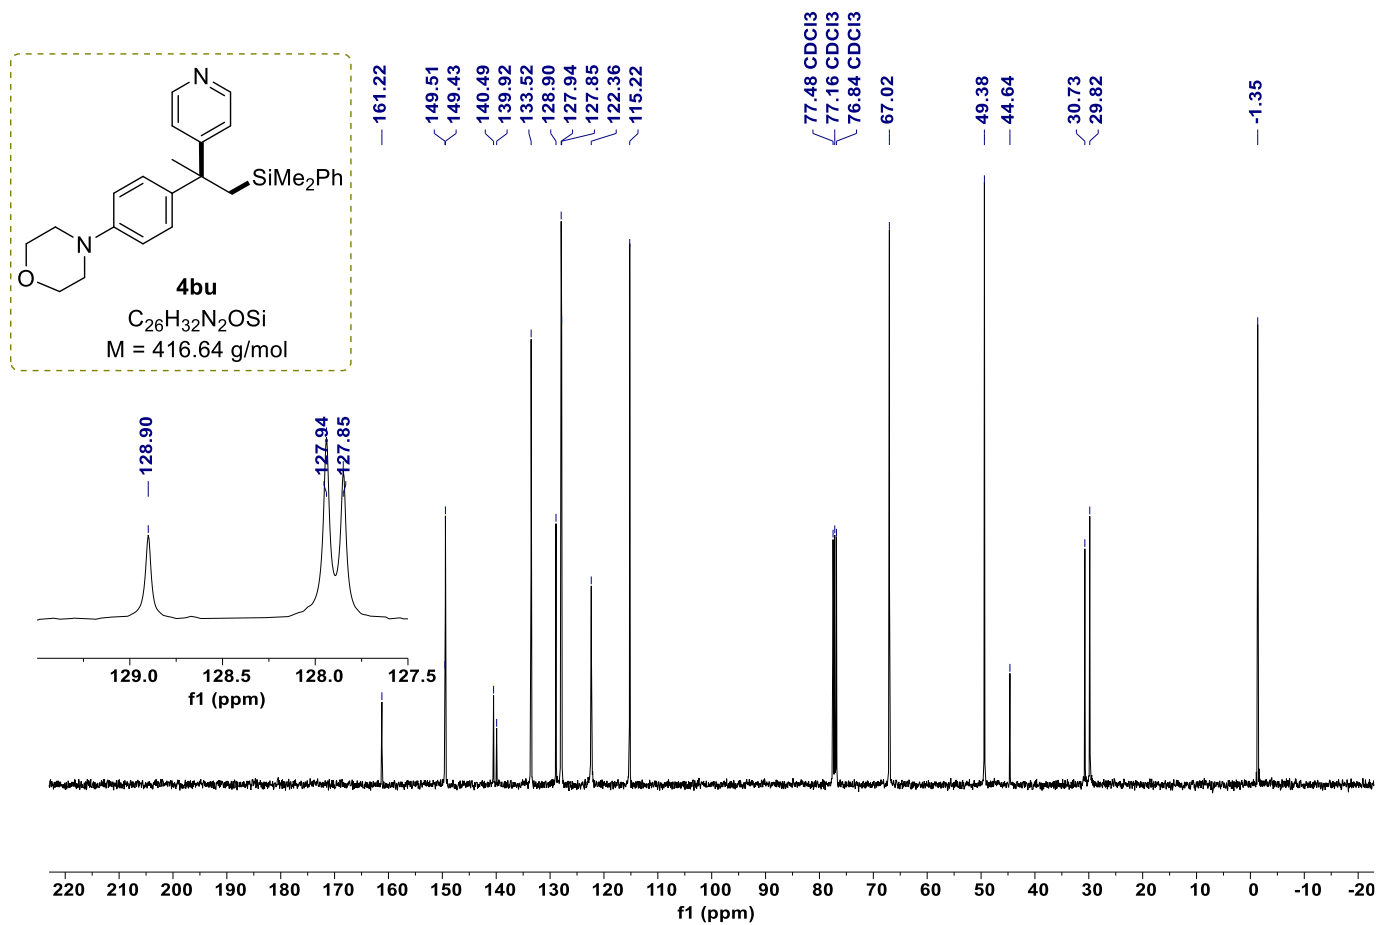

$^{13}C$  NMR spectrum (100 MHz,  $CDCl_3$ ) of compound **4bu**.

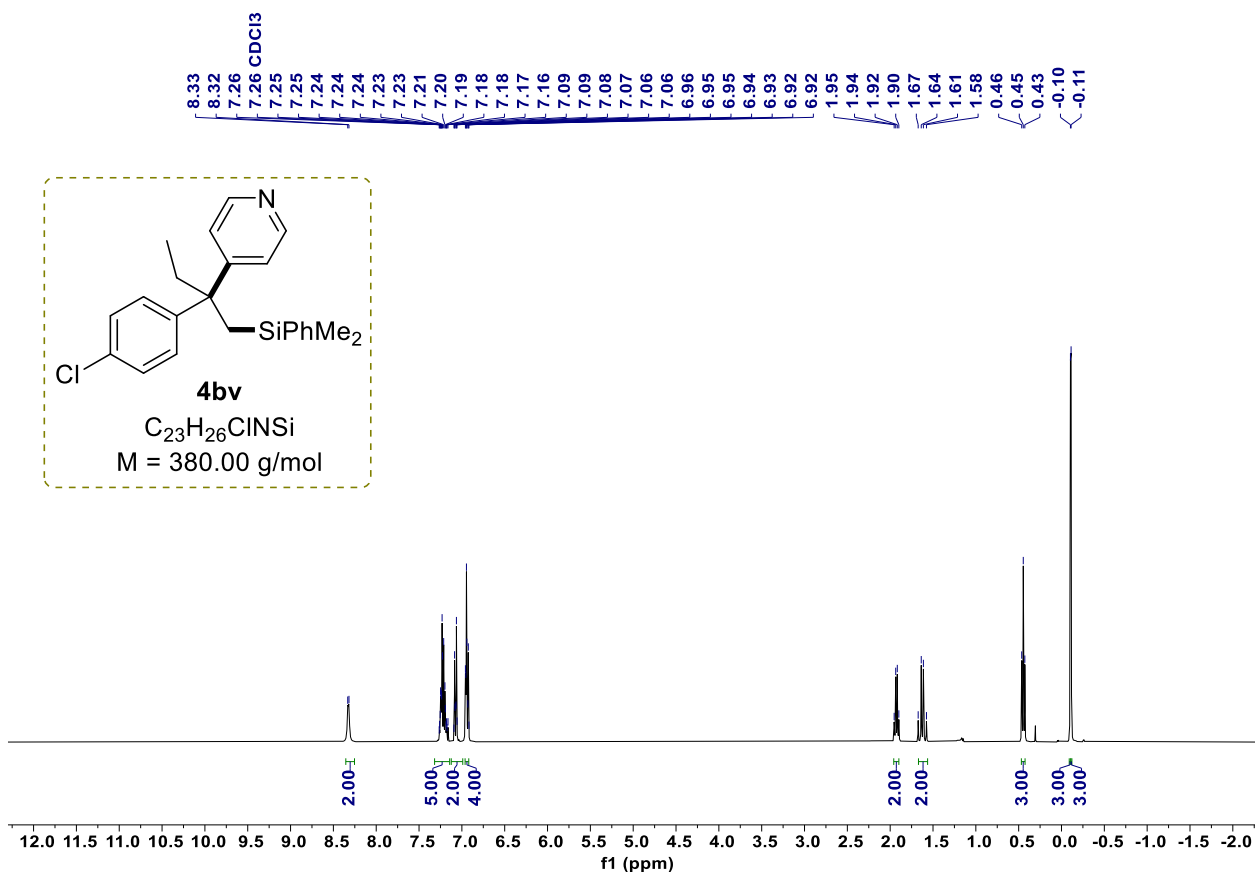

$^1H$  NMR spectrum (400 MHz,  $CDCl_3$ ) of compound 4bv.

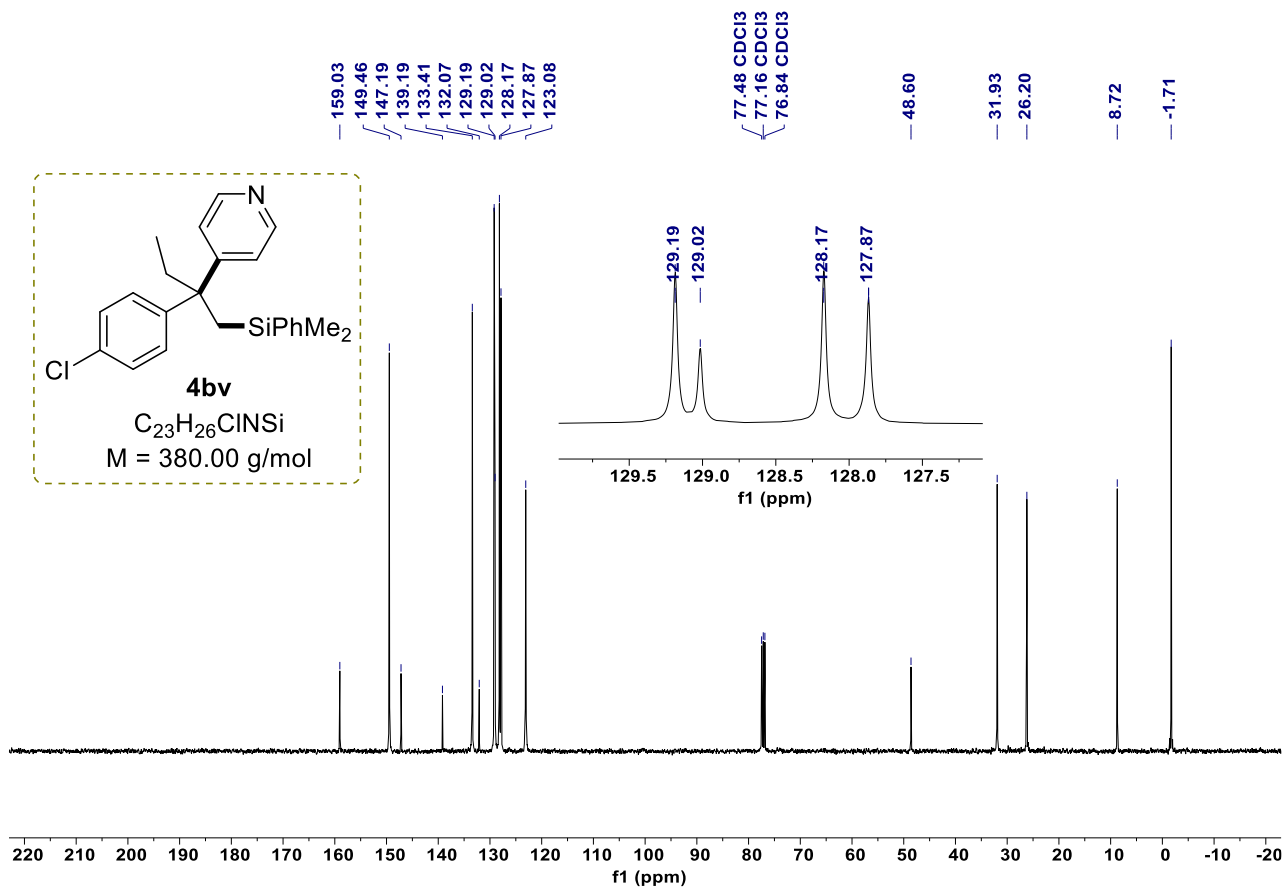

$^{13}C$  NMR spectrum (100 MHz,  $CDCl_3$ ) of compound 4bv.



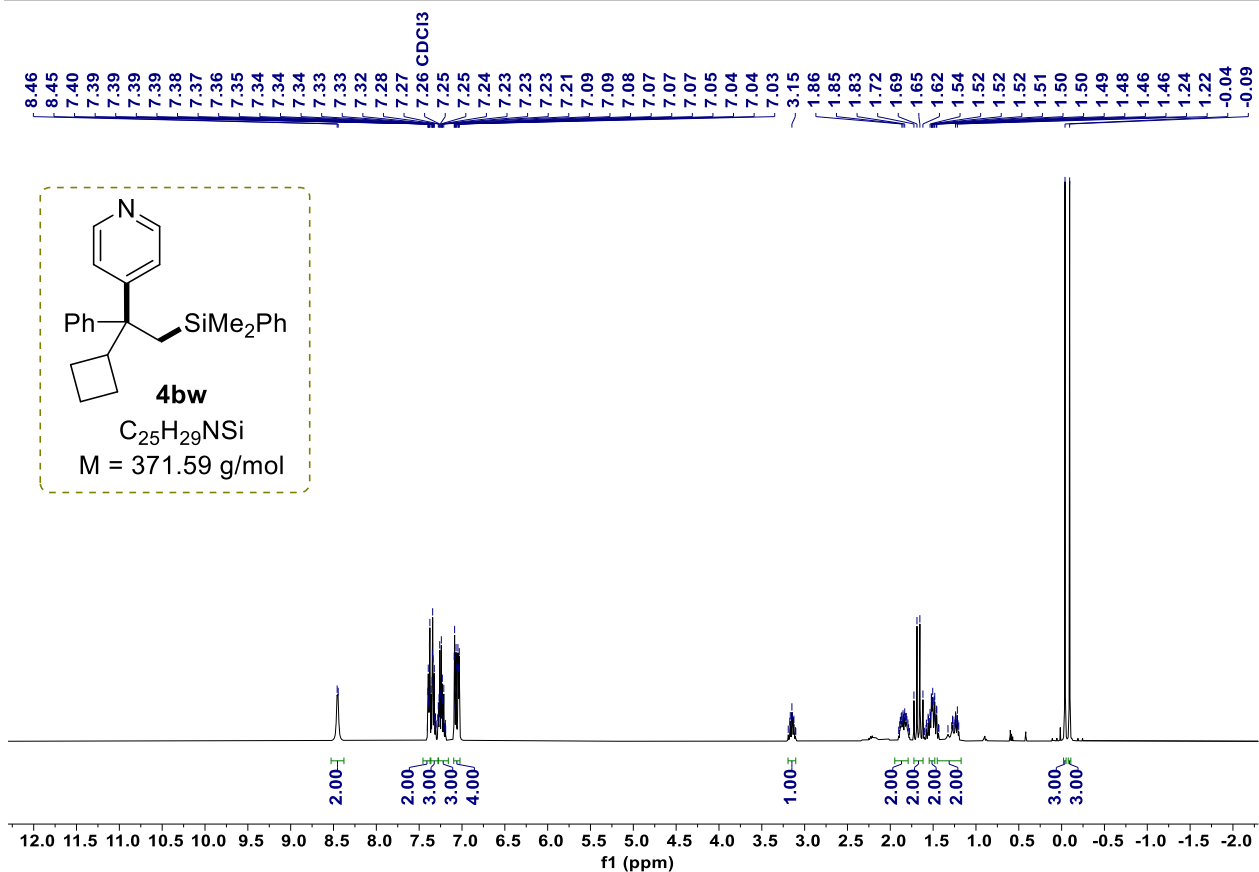

$^1H$  NMR spectrum (400 MHz,  $CDCl_3$ ) of compound **4bw**.

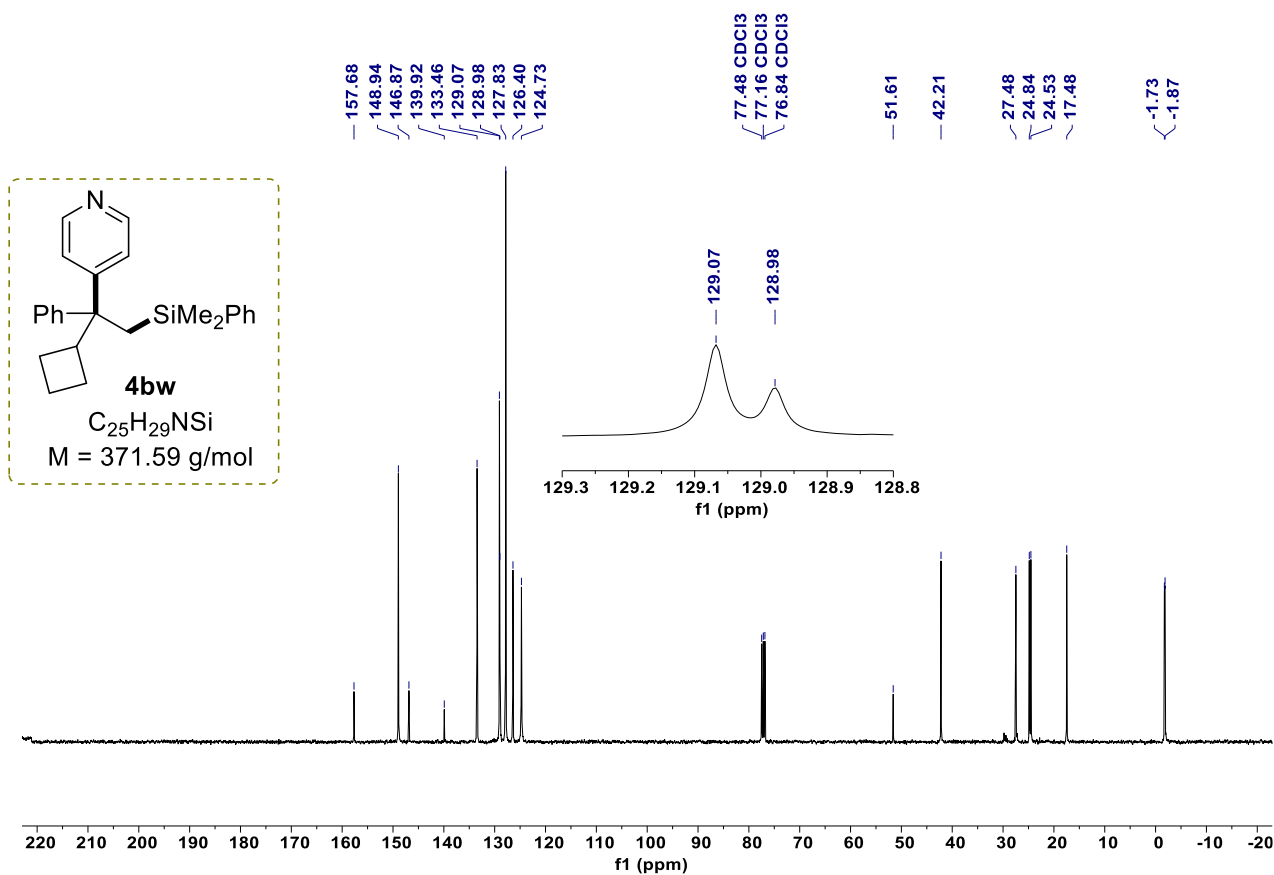

$^{13}C$  NMR spectrum (100 MHz,  $CDCl_3$ ) of compound **4bw**.

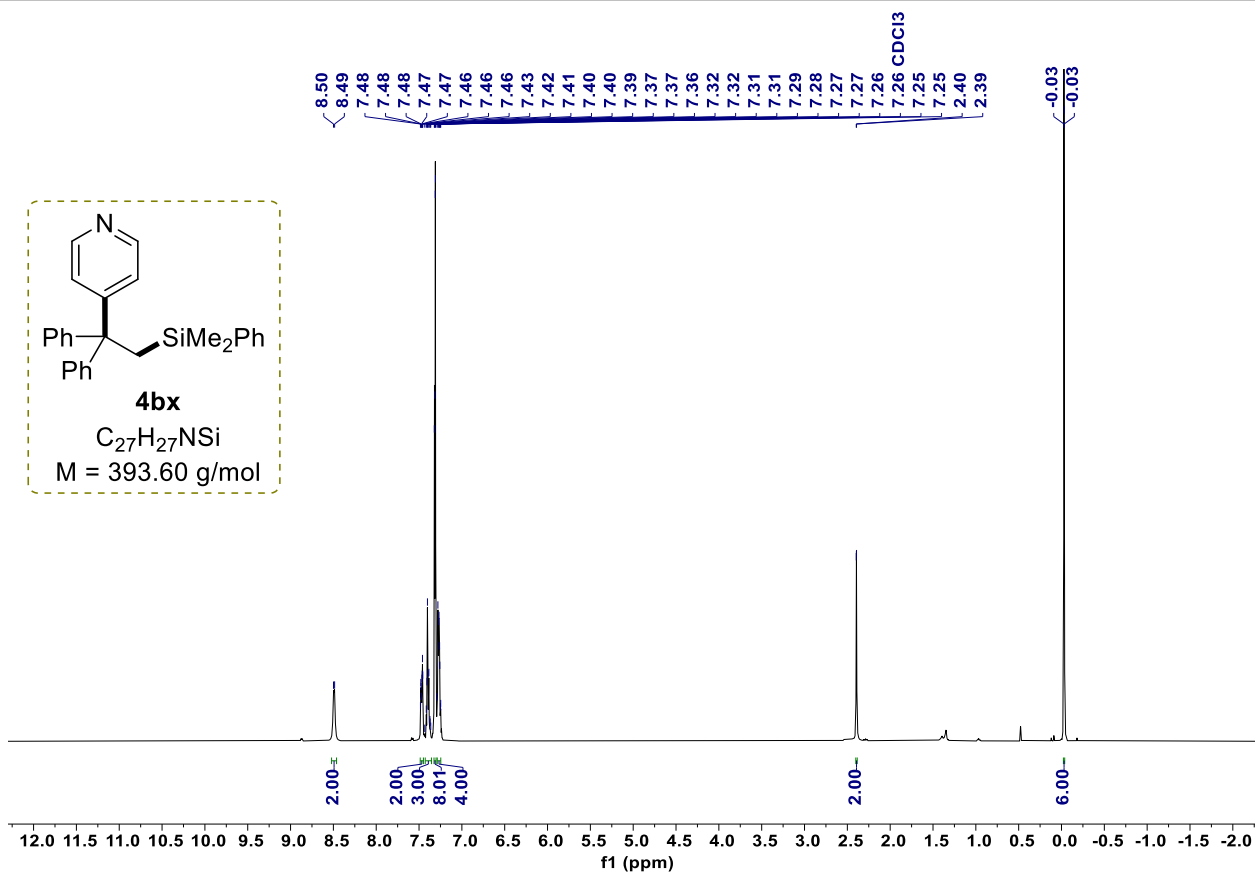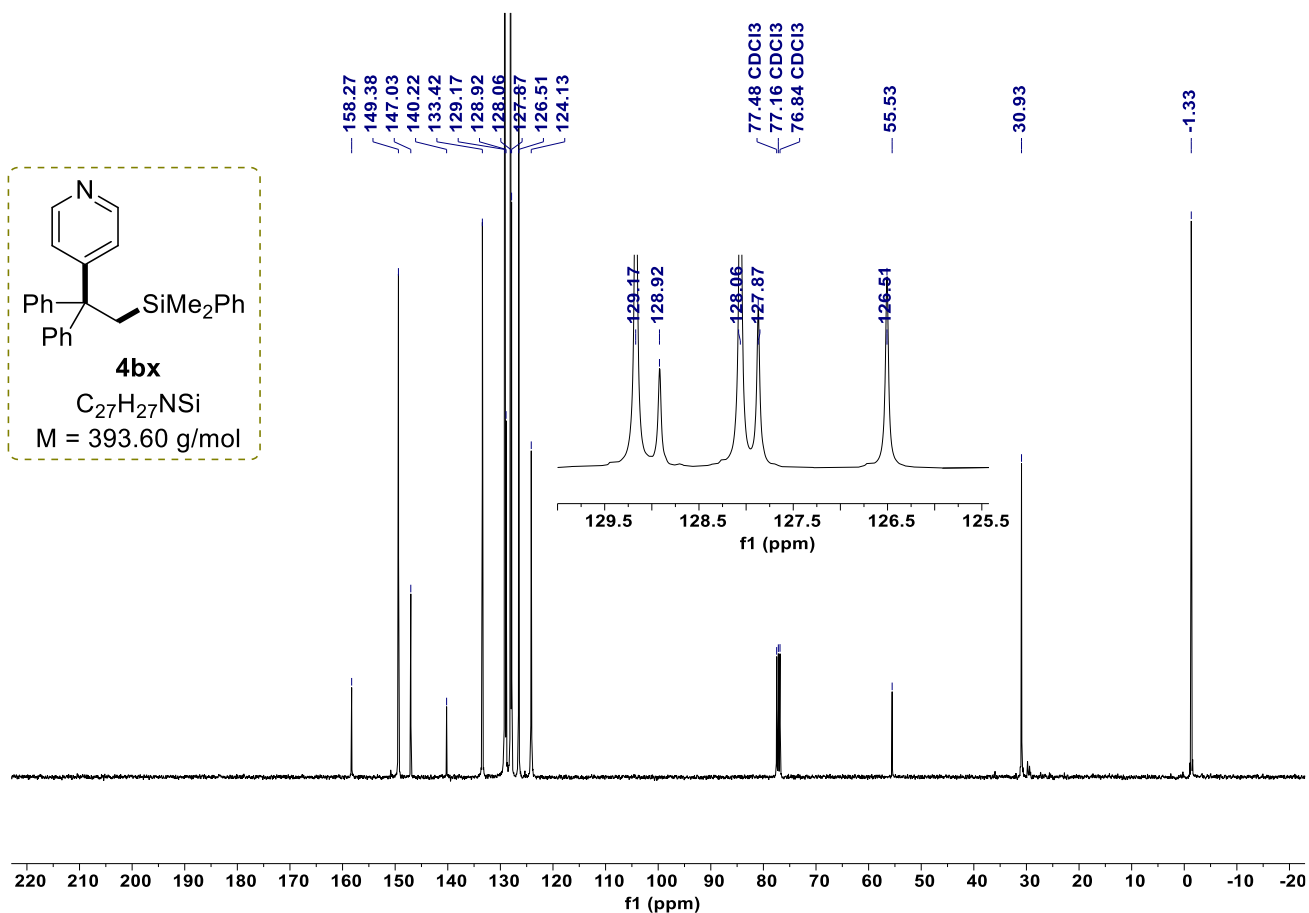

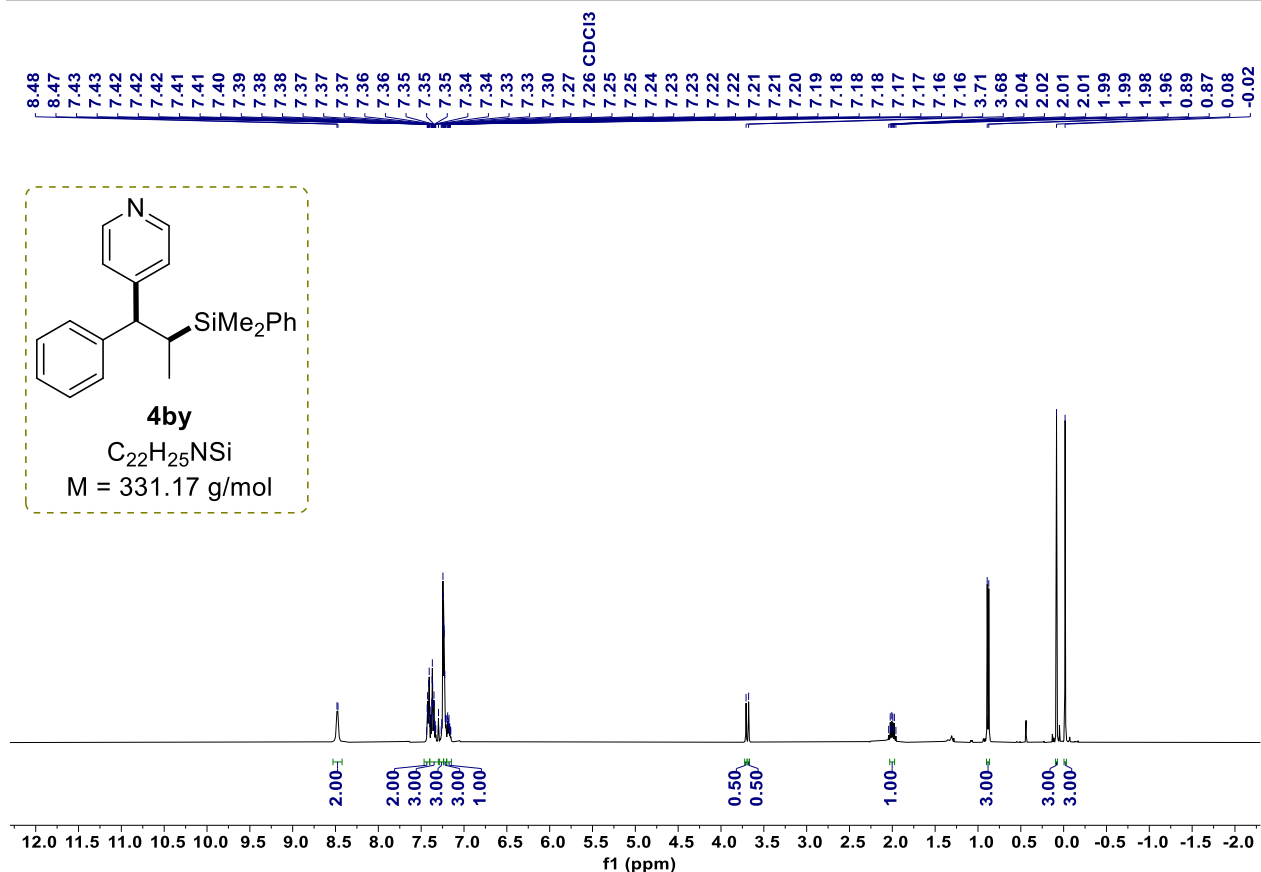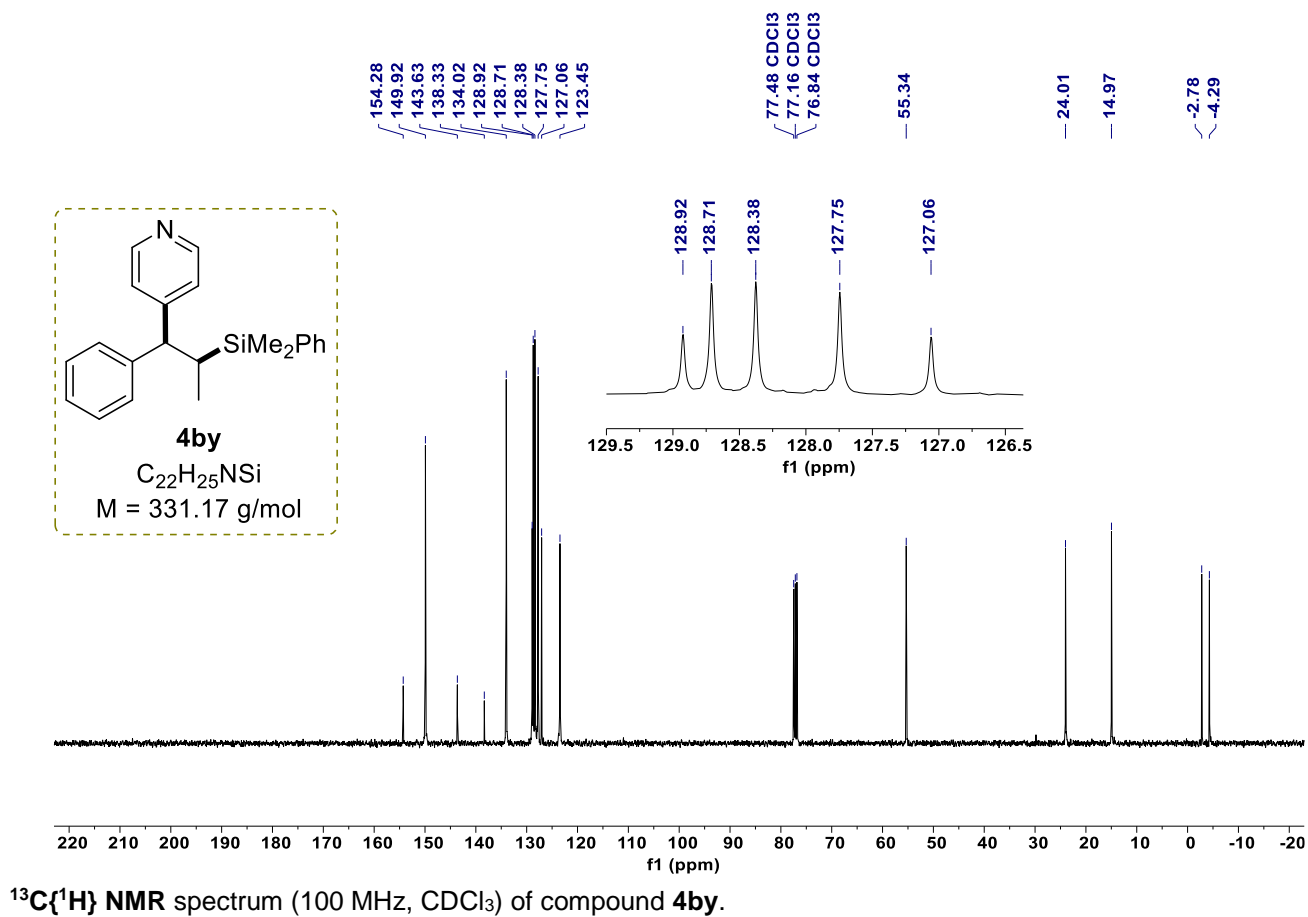

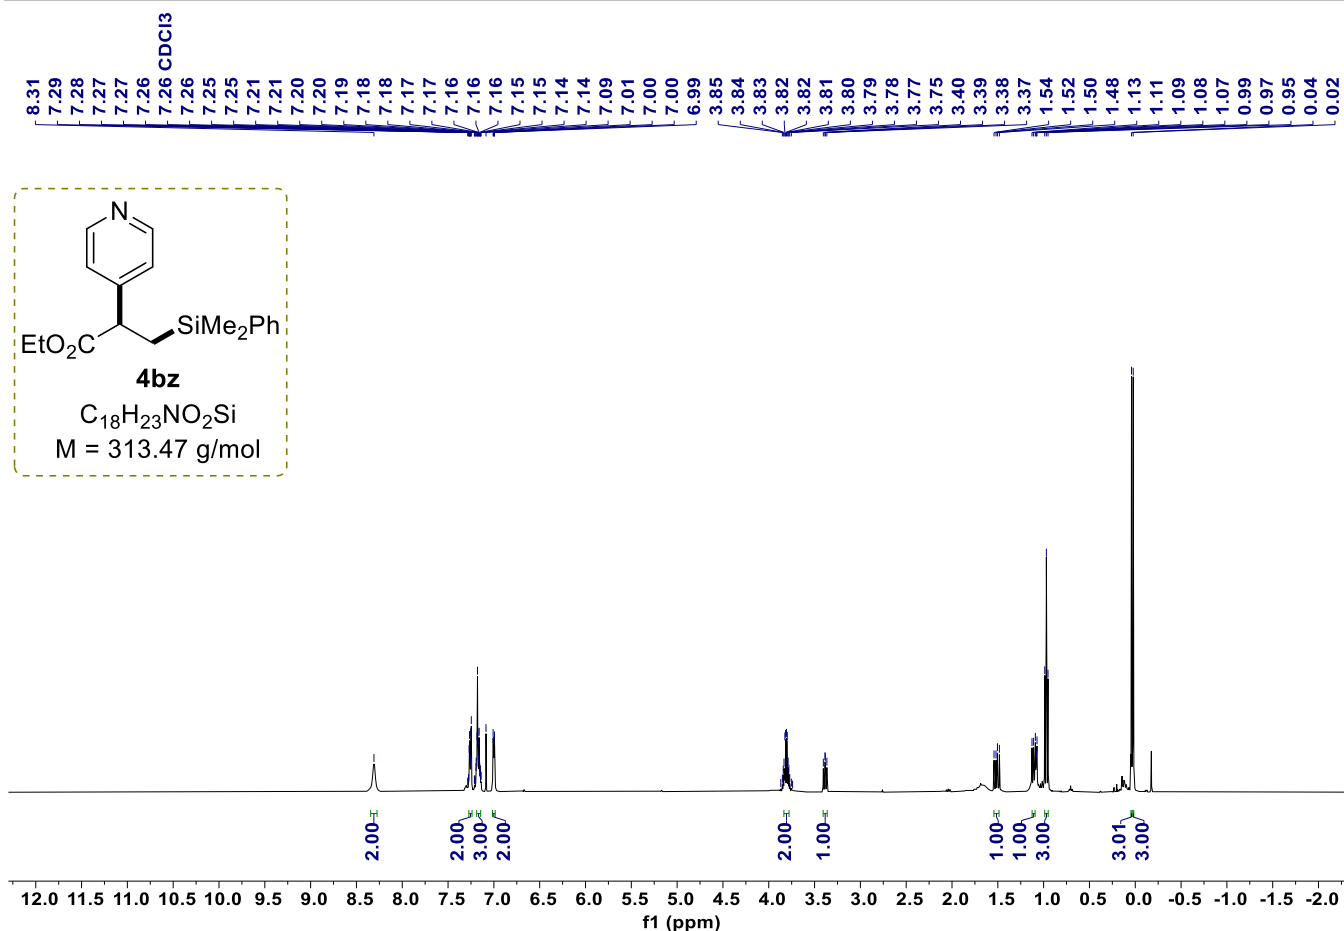

$^1H$  NMR spectrum (400 MHz,  $CDCl_3$ ) of compound **4bz**.

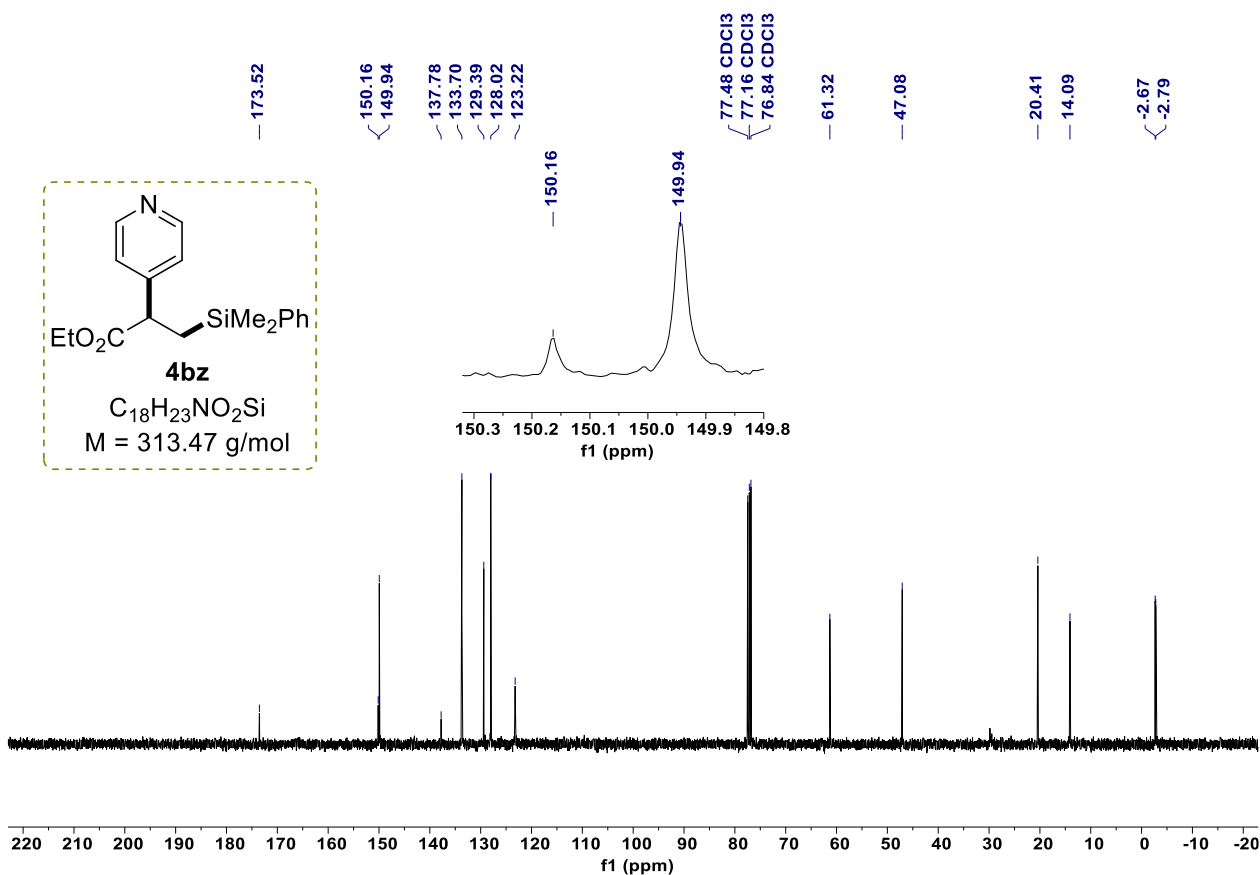

$^{13}C$  NMR spectrum (100 MHz,  $CDCl_3$ ) of compound **4bz**.

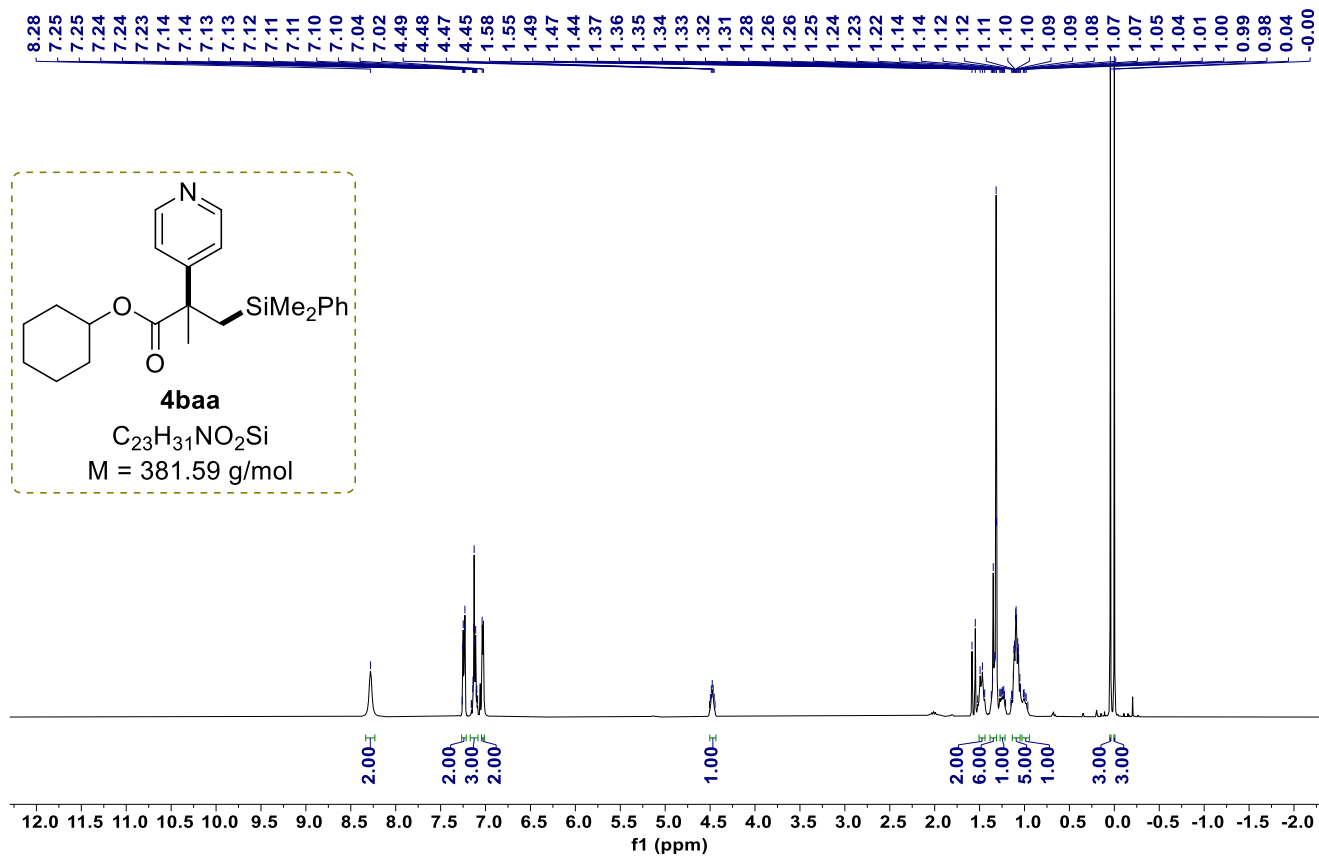

$^1H$  NMR spectrum (400 MHz,  $CDCl_3$ ) of compound **4baa**.

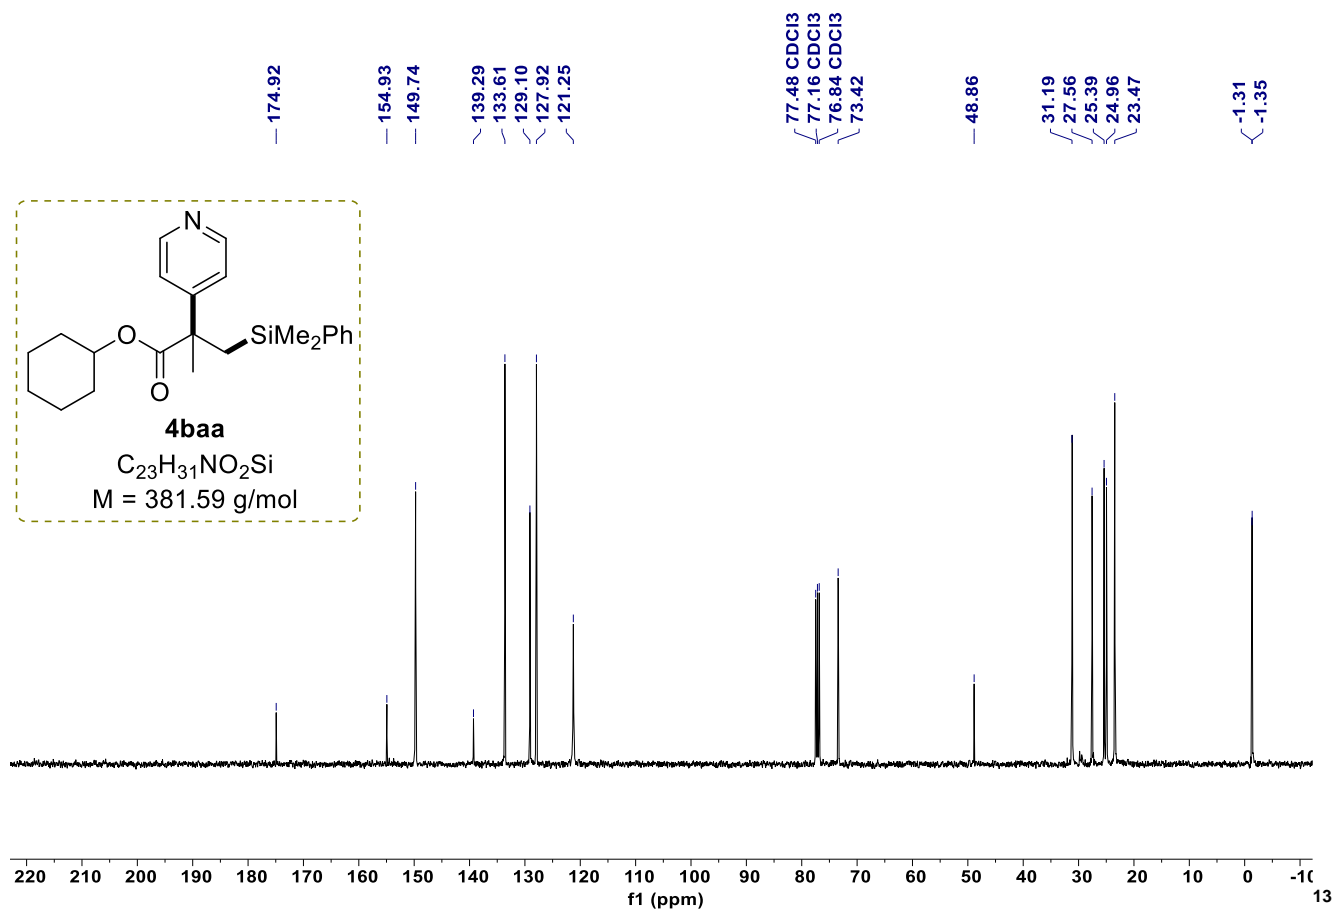

$C\{^{13}H\}$  NMR spectrum (100 MHz,  $CDCl_3$ ) of compound **4baa**.

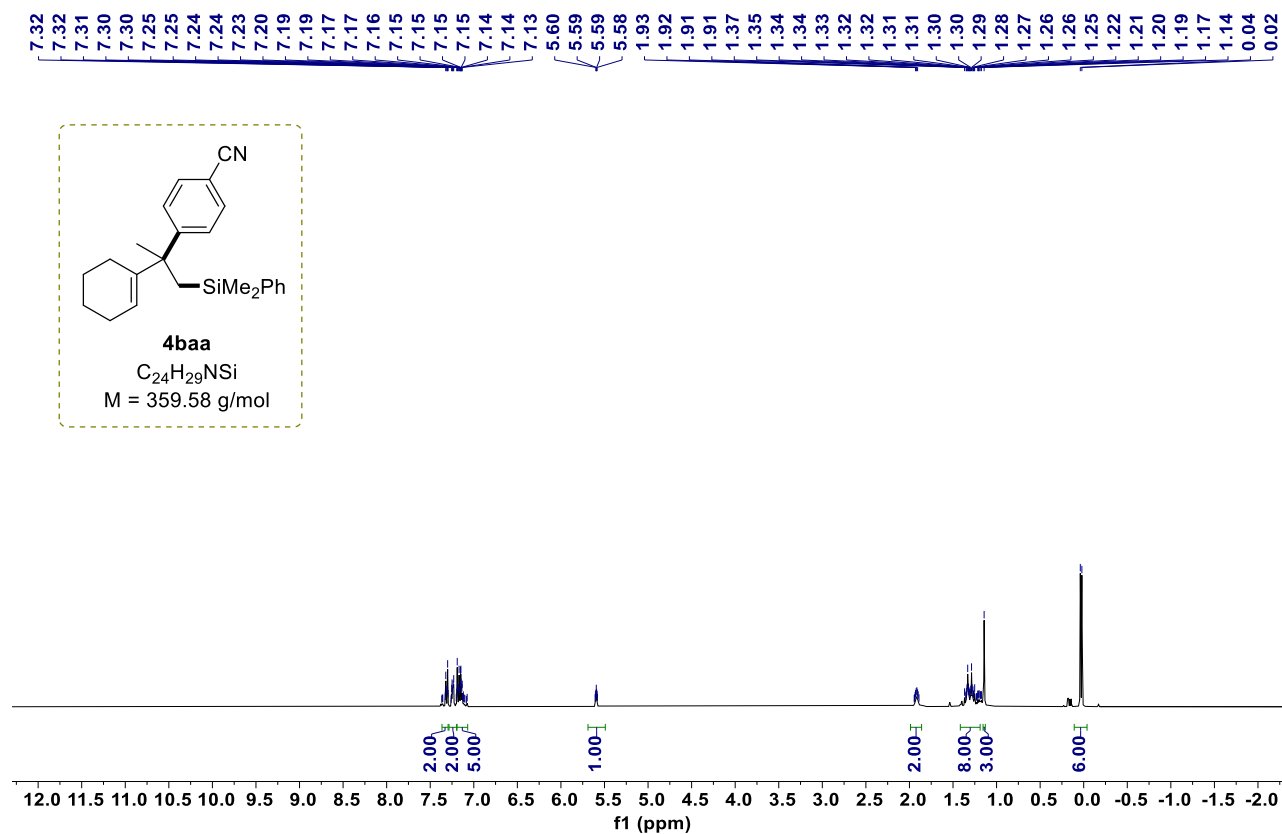

$^1\text{H}$  NMR spectrum (400 MHz,  $\text{CDCl}_3$ ) of compound **4bab**.

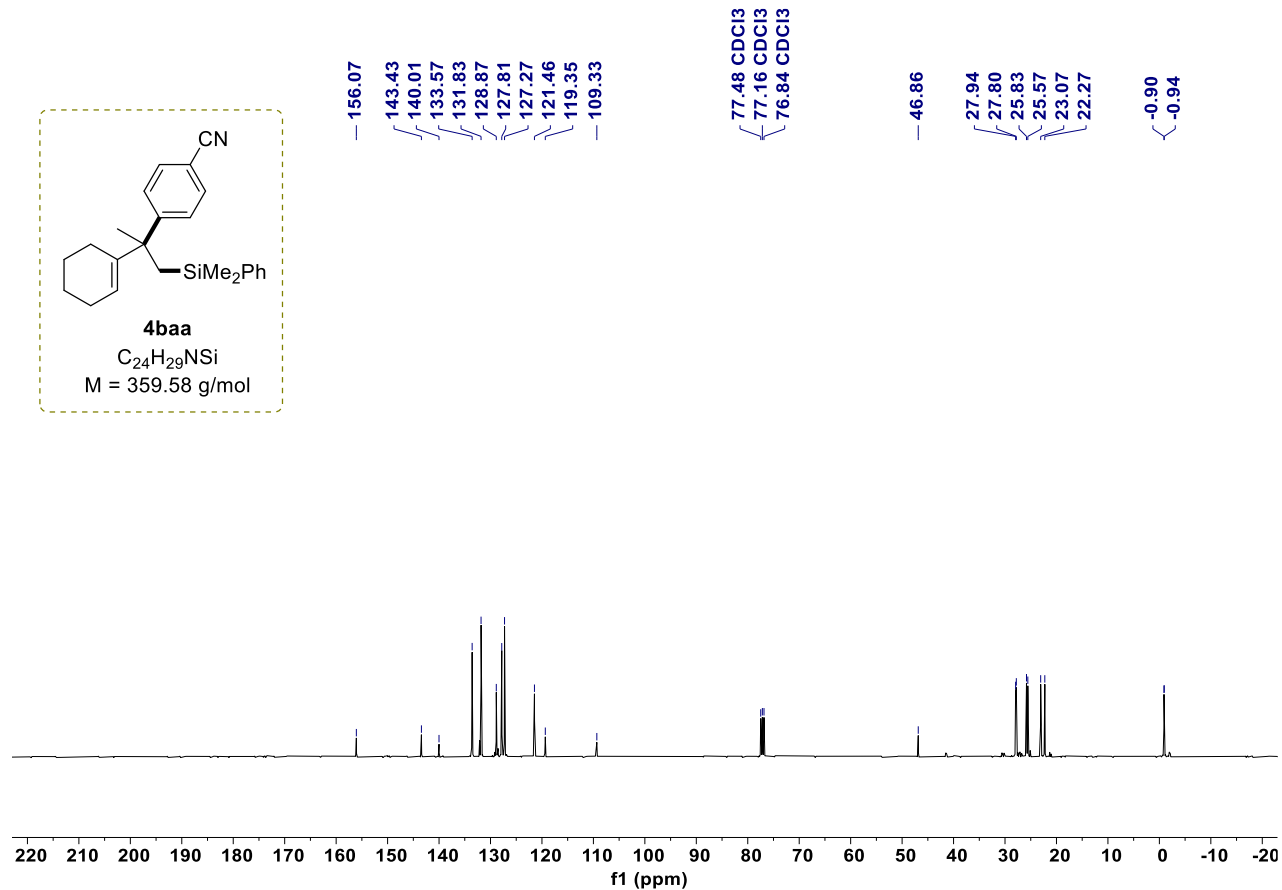

$\text{C}\{^1\text{H}\}$  NMR spectrum (100 MHz,  $\text{CDCl}_3$ ) of compound **4bab**.

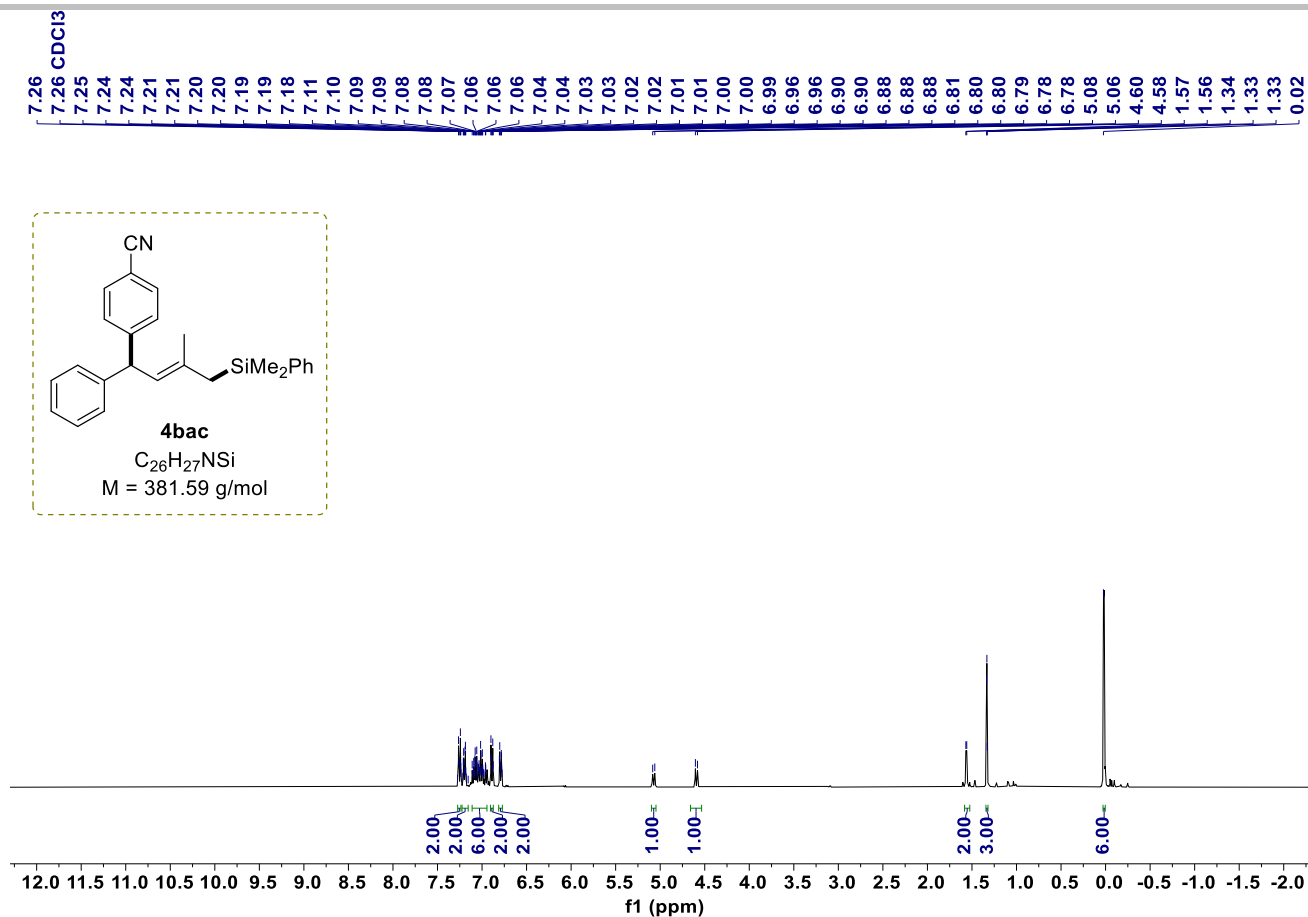

<sup>1</sup>H NMR spectrum (400 MHz, CDCl<sub>3</sub>) of compound **4bac**.

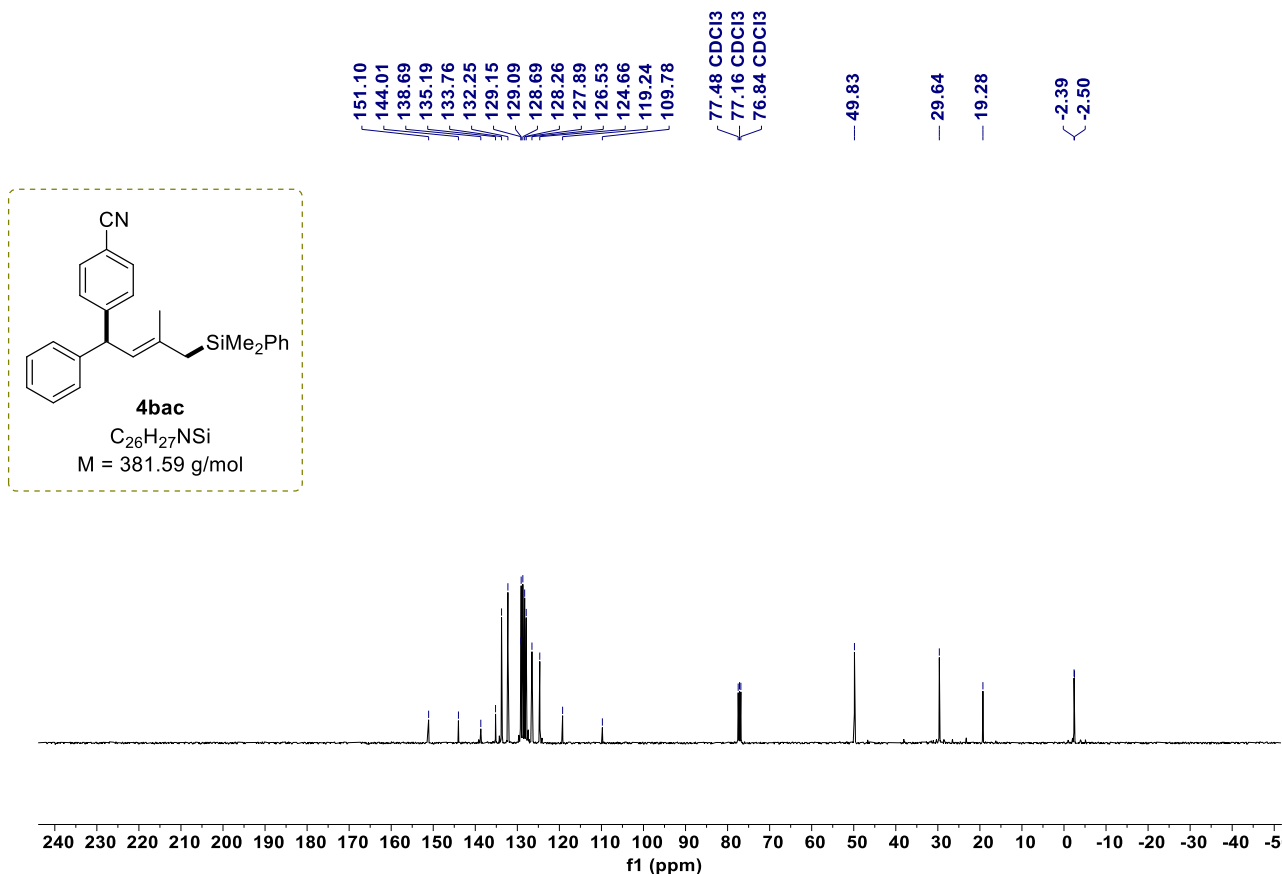

C{<sup>1</sup>H} NMR spectrum (100 MHz, CDCl<sub>3</sub>) of compound **4bac**.

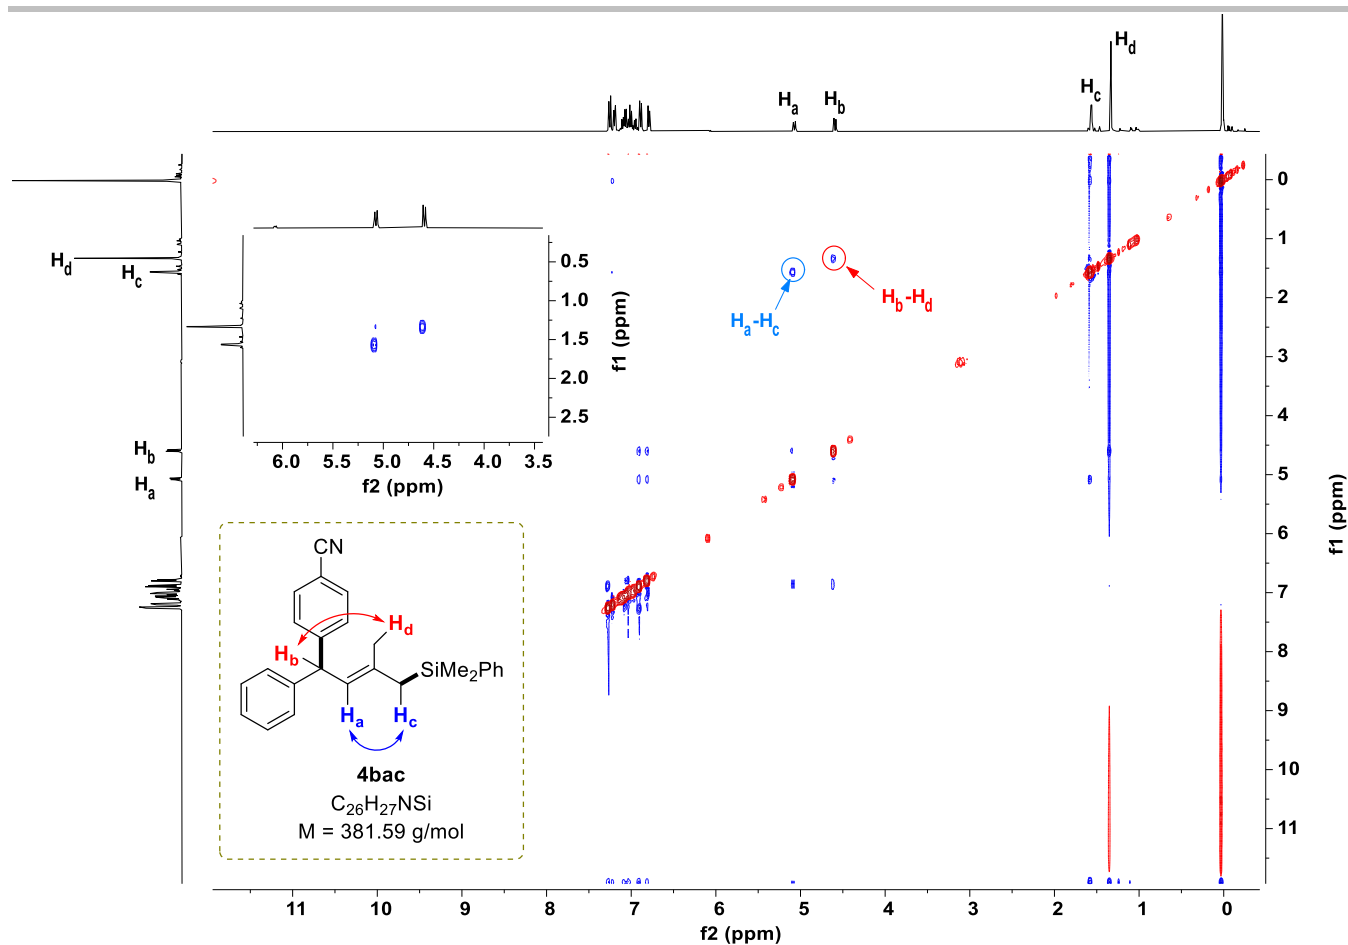

2D NOE spectrum (400 MHz,  $CDCl_3$ ) of compound **4bac**

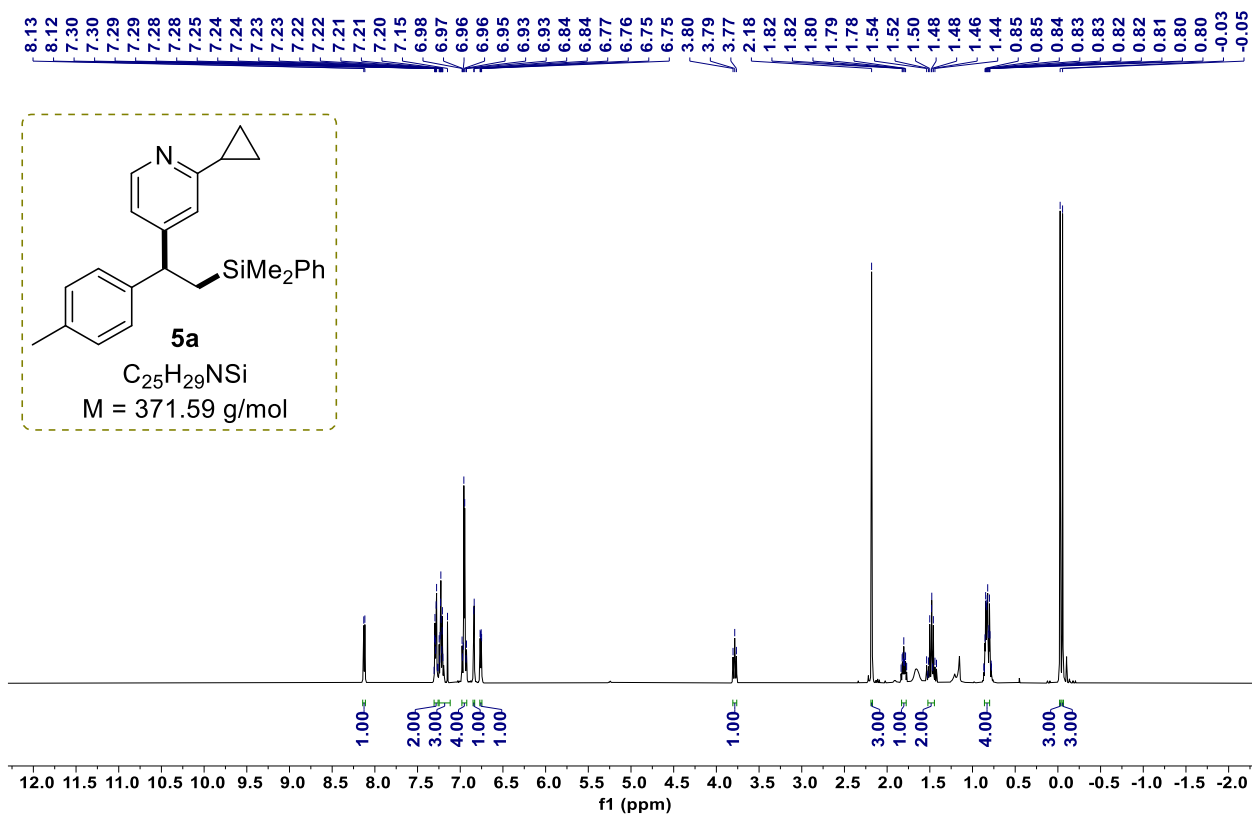

$^1H$  NMR spectrum (400 MHz,  $CDCl_3$ ) of compound **5a**.



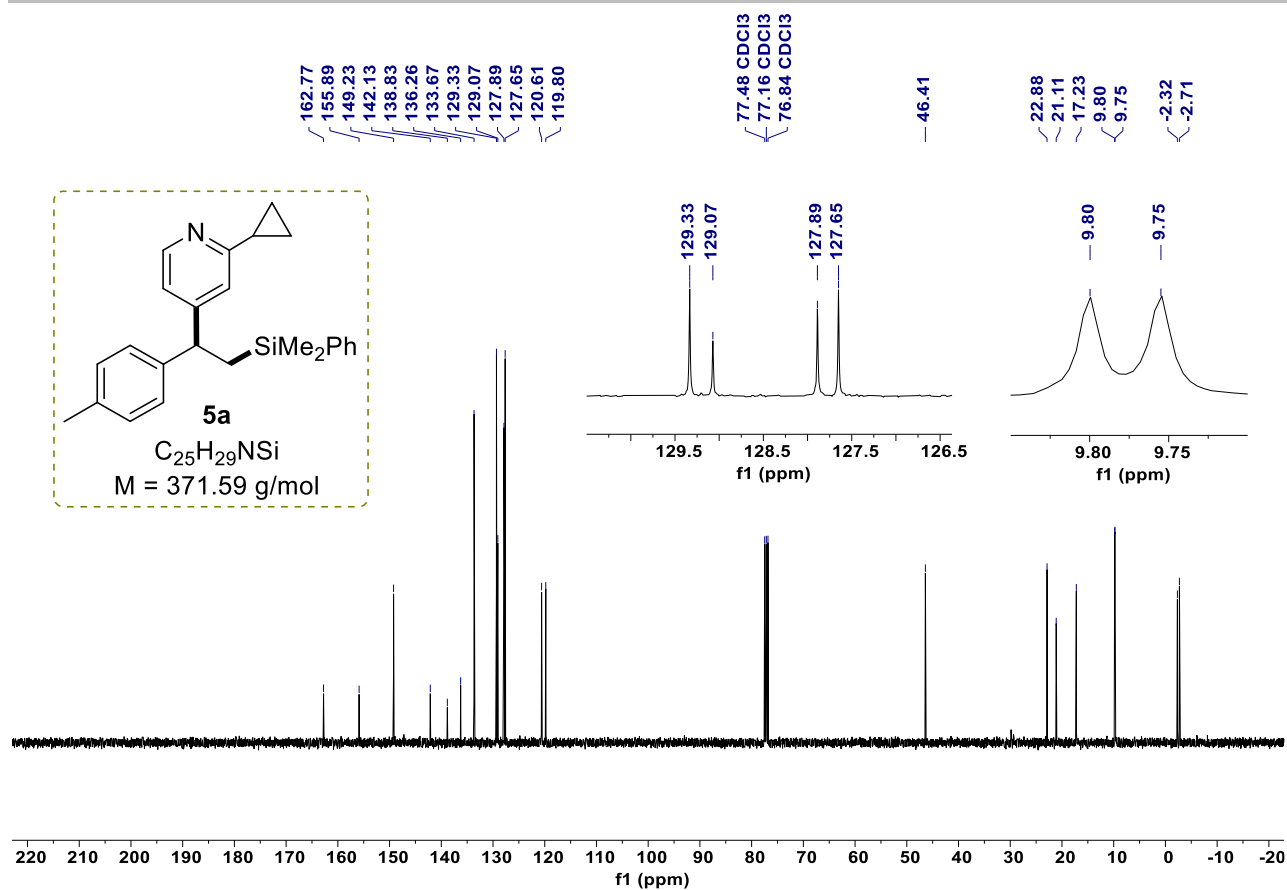

$^{13}C\{^1H\}$  NMR spectrum (100 MHz,  $CDCl_3$ ) of compound **5a**.

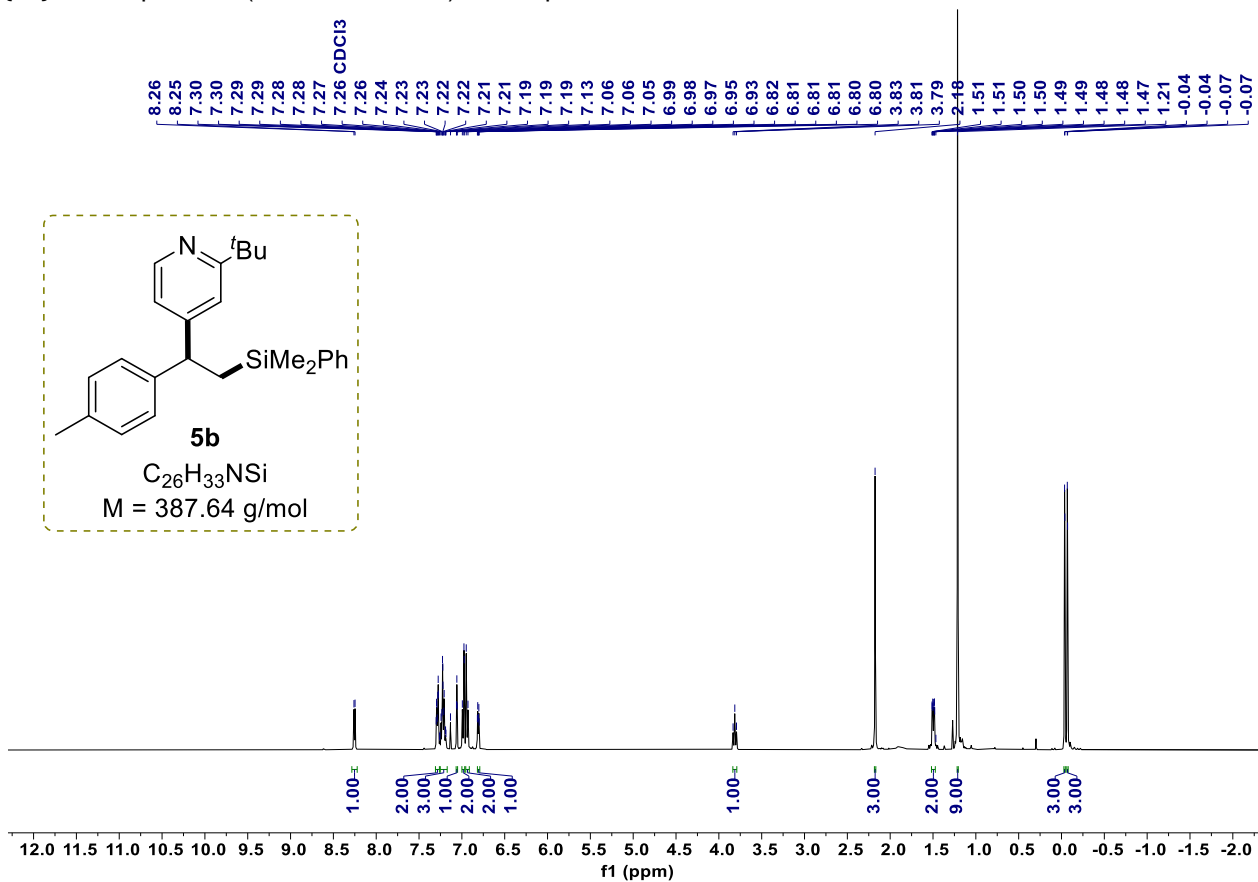

$^1H$  NMR spectrum (400 MHz,  $CDCl_3$ ) of compound **5b**.

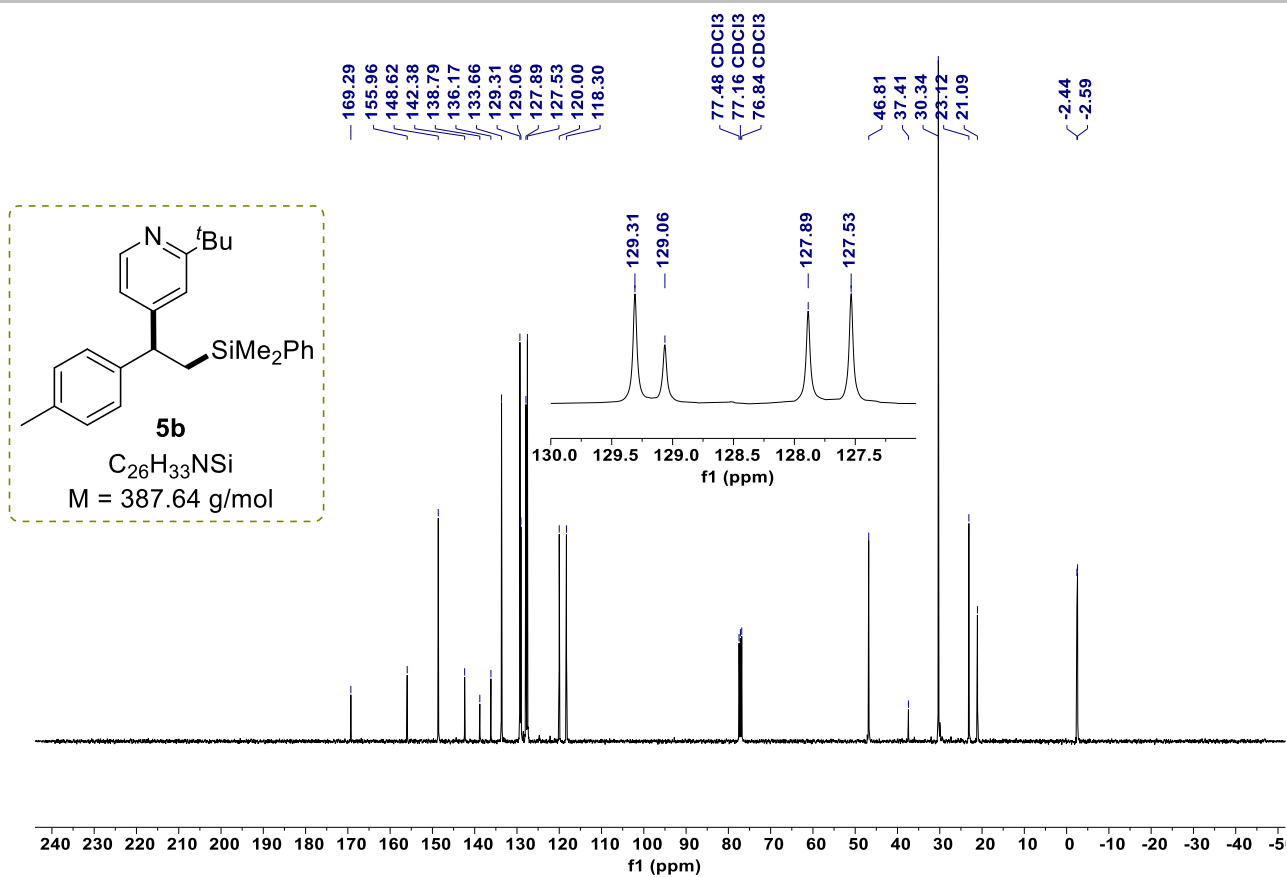

$^{13}C\{^1H\}$  NMR spectrum (100 MHz,  $CDCl_3$ ) of compound **5b**.

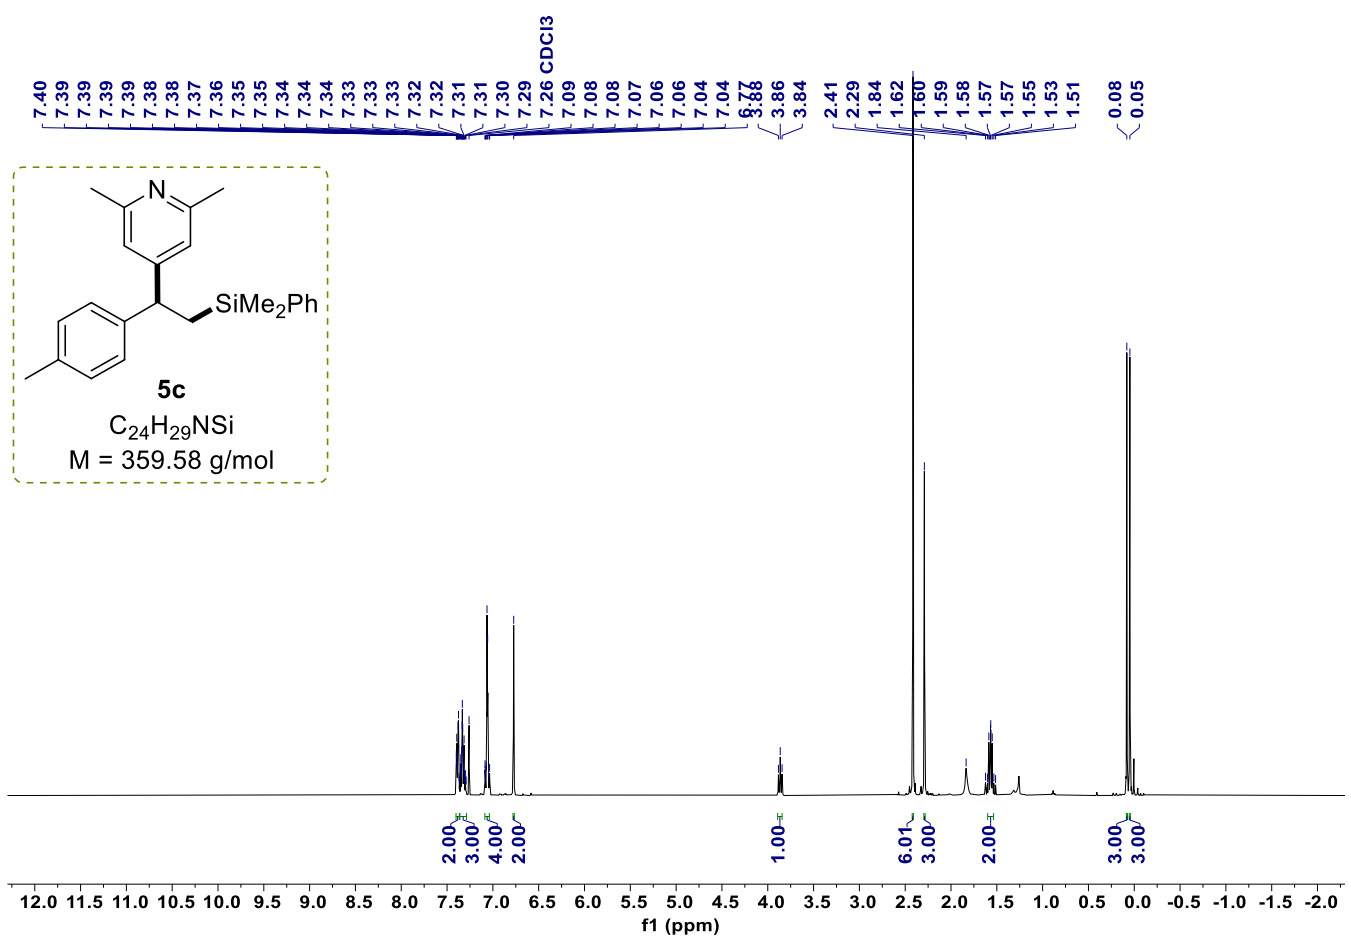

$^1H$  NMR spectrum (400 MHz,  $CDCl_3$ ) of compound **5c**.

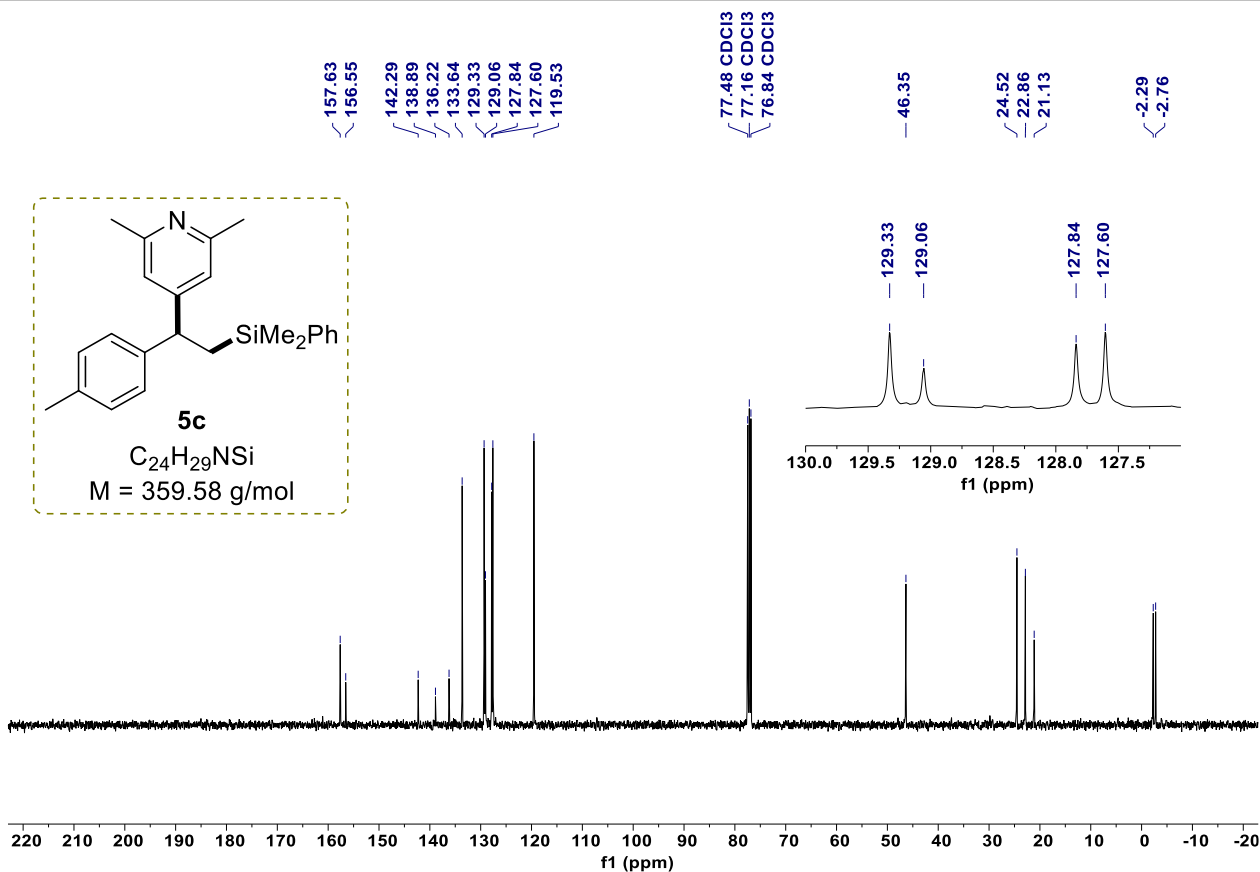

$^{13}\text{C}\{^1\text{H}\}$  NMR spectrum (100 MHz,  $\text{CDCl}_3$ ) of compound **5c**.

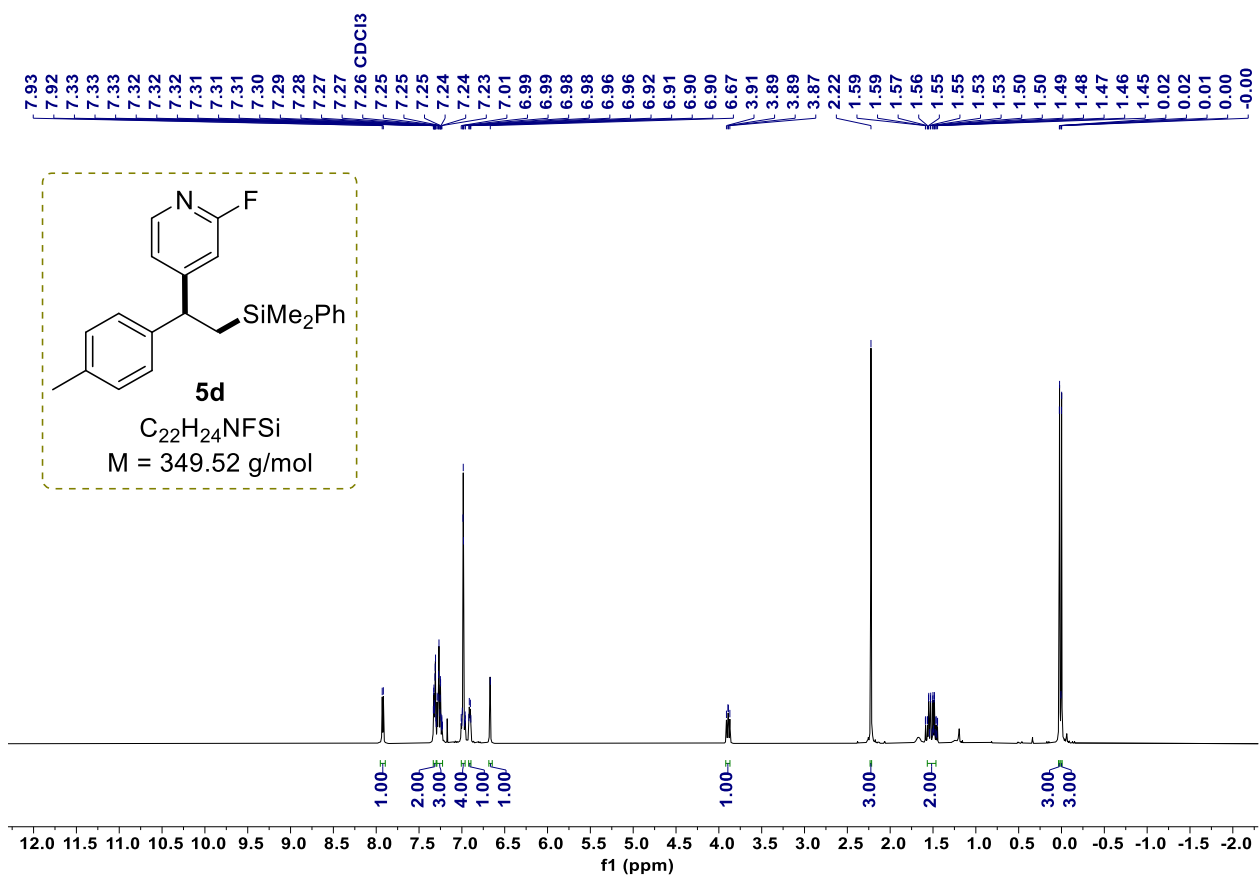

$^1\text{H}$  NMR spectrum (400 MHz,  $\text{CDCl}_3$ ) of compound **5d**.

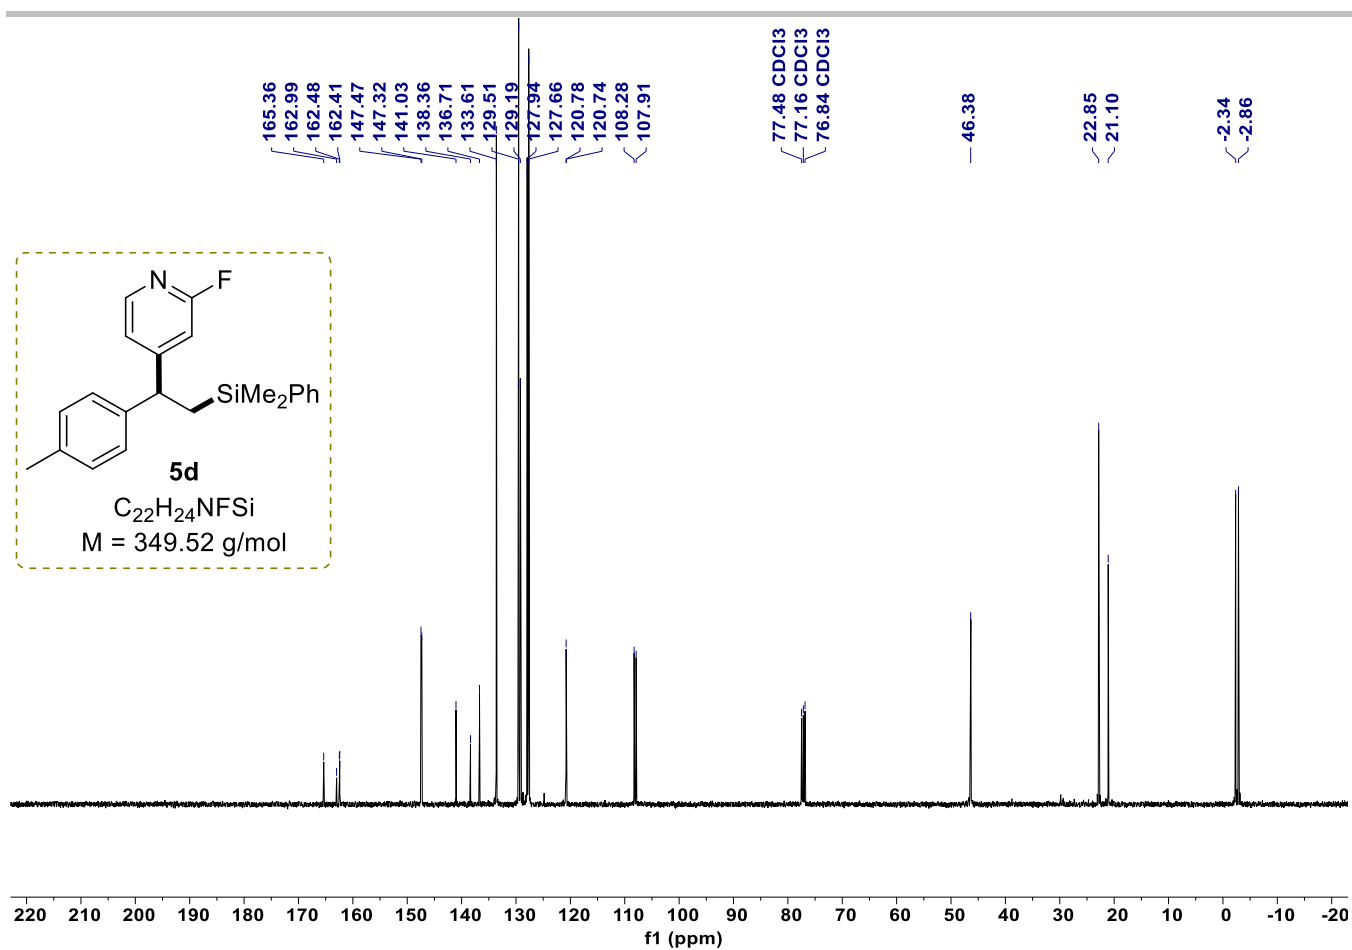

<sup>13</sup>C{<sup>1</sup>H} NMR spectrum (100 MHz, CDCl<sub>3</sub>) of compound **5d**.

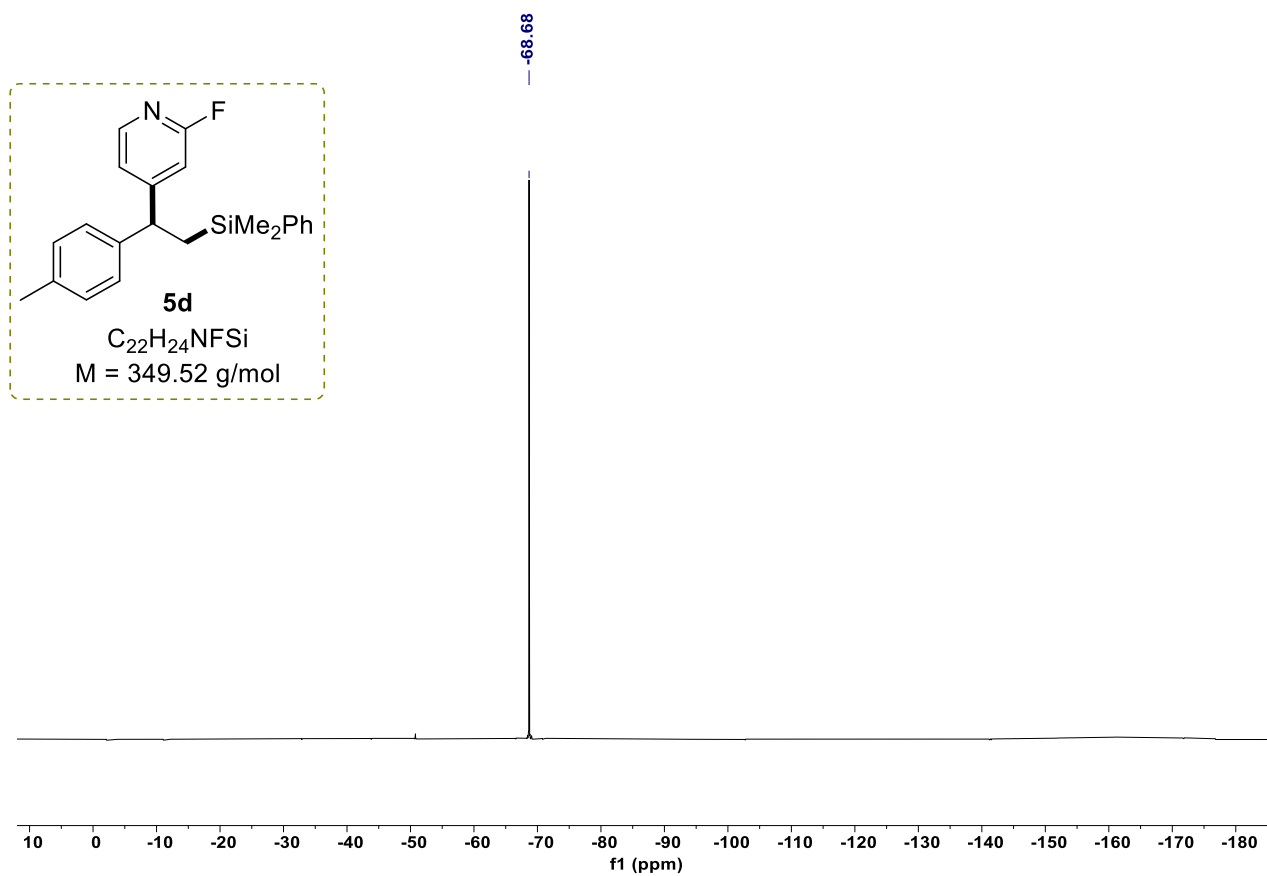

<sup>19</sup>F NMR spectrum (376 MHz, CDCl<sub>3</sub>) of compound **5e**.

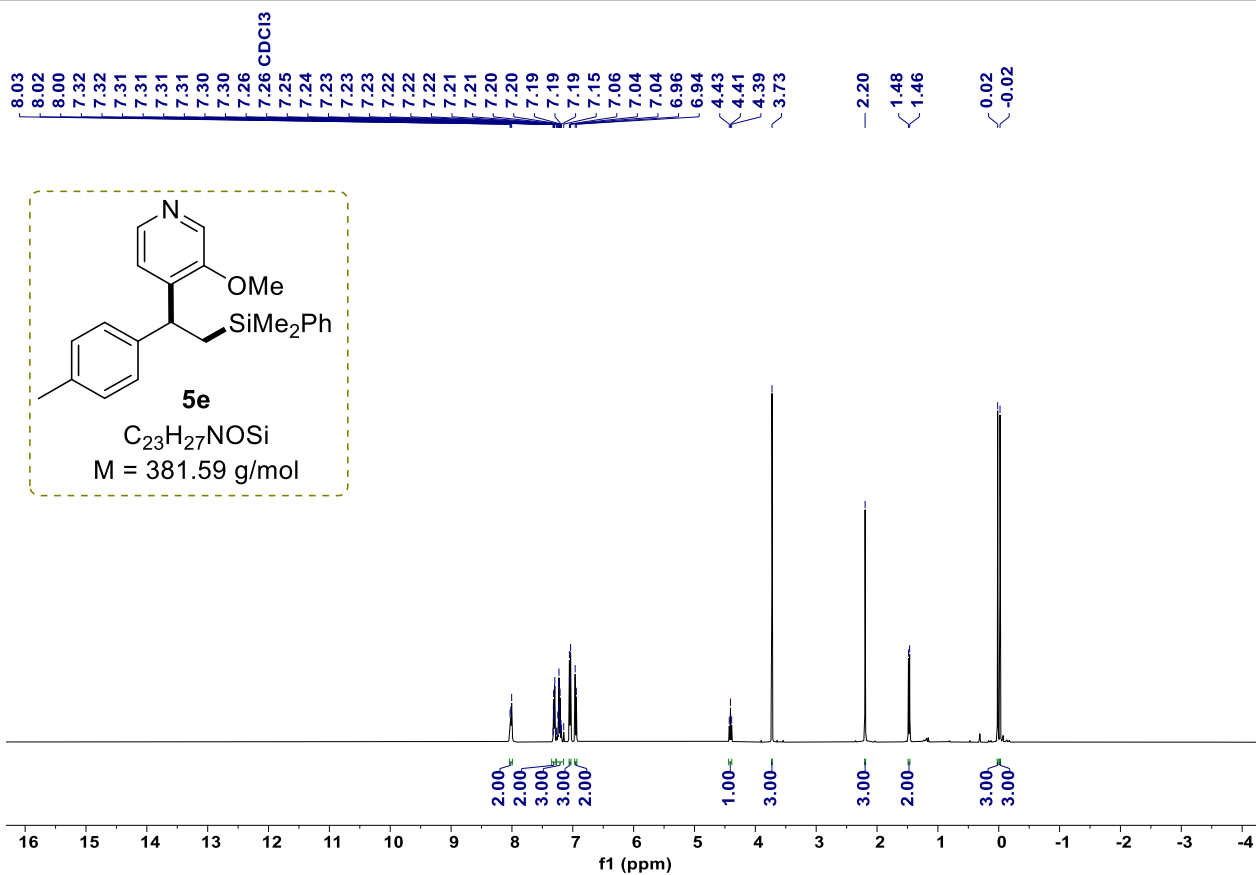

**$^1H$  NMR spectrum (400 MHz,  $CDCl_3$ ) of compound 5e.**

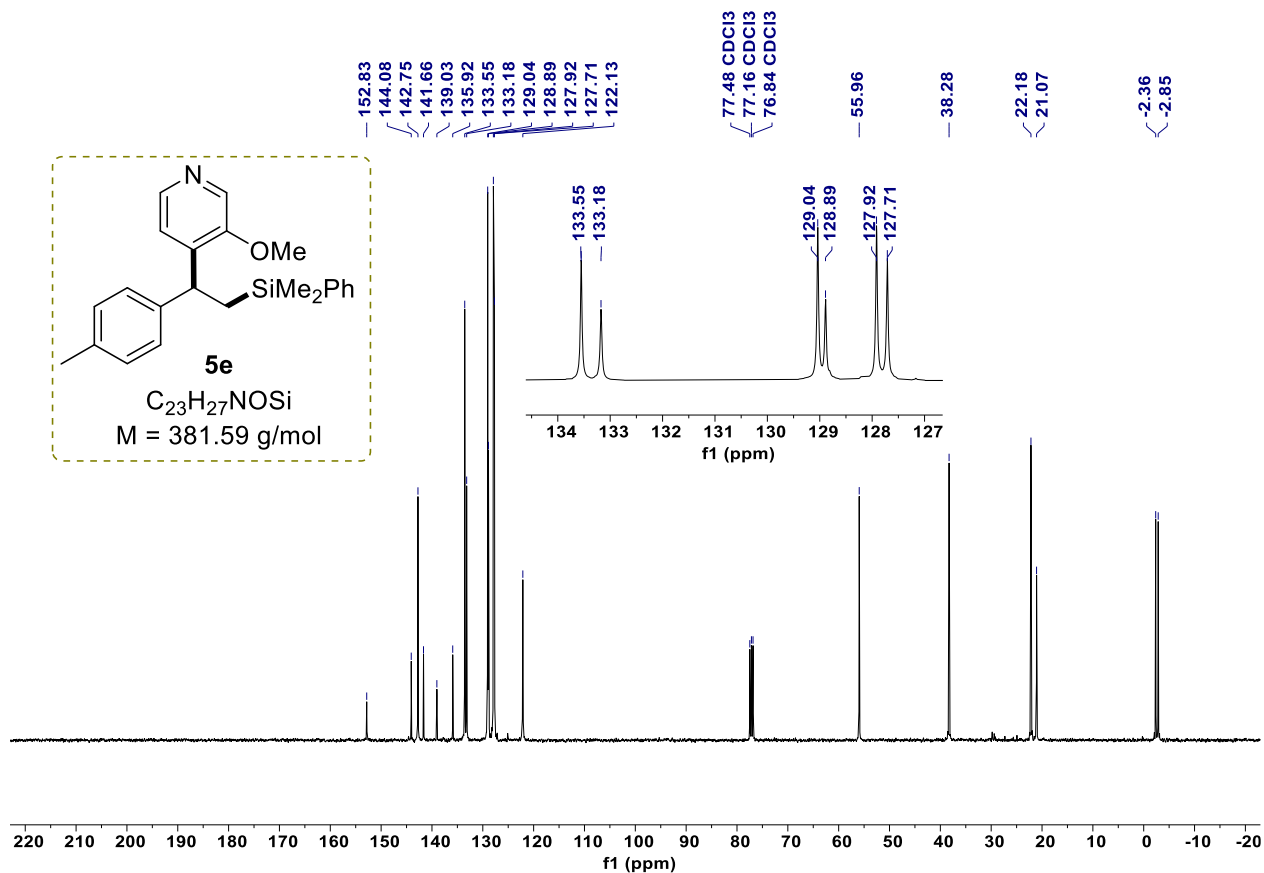

**$^{13}C\{^1H\}$  NMR spectrum (100 MHz,  $CDCl_3$ ) of compound 5e.**

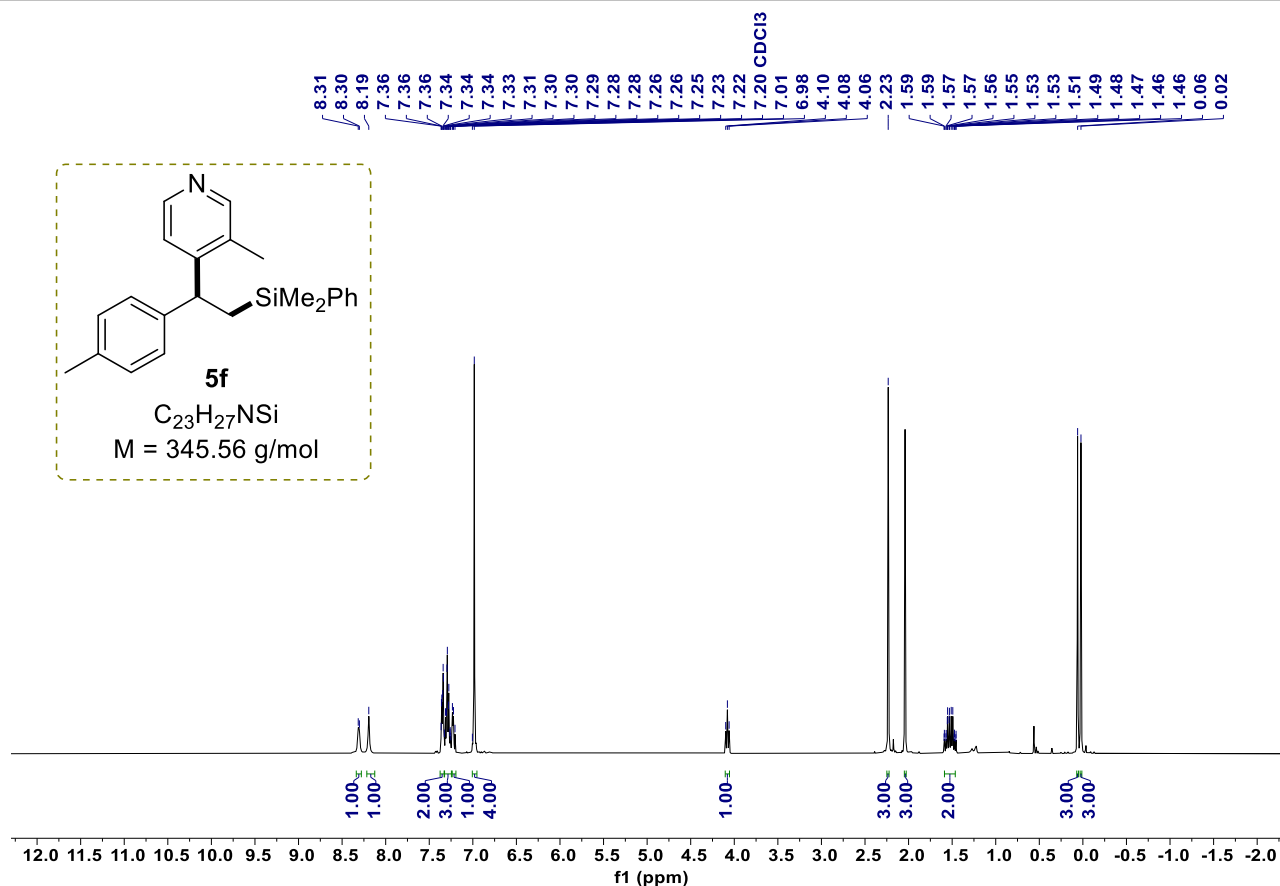

<sup>1</sup>H NMR spectrum (400 MHz, CDCl<sub>3</sub>) of compound **5f**.

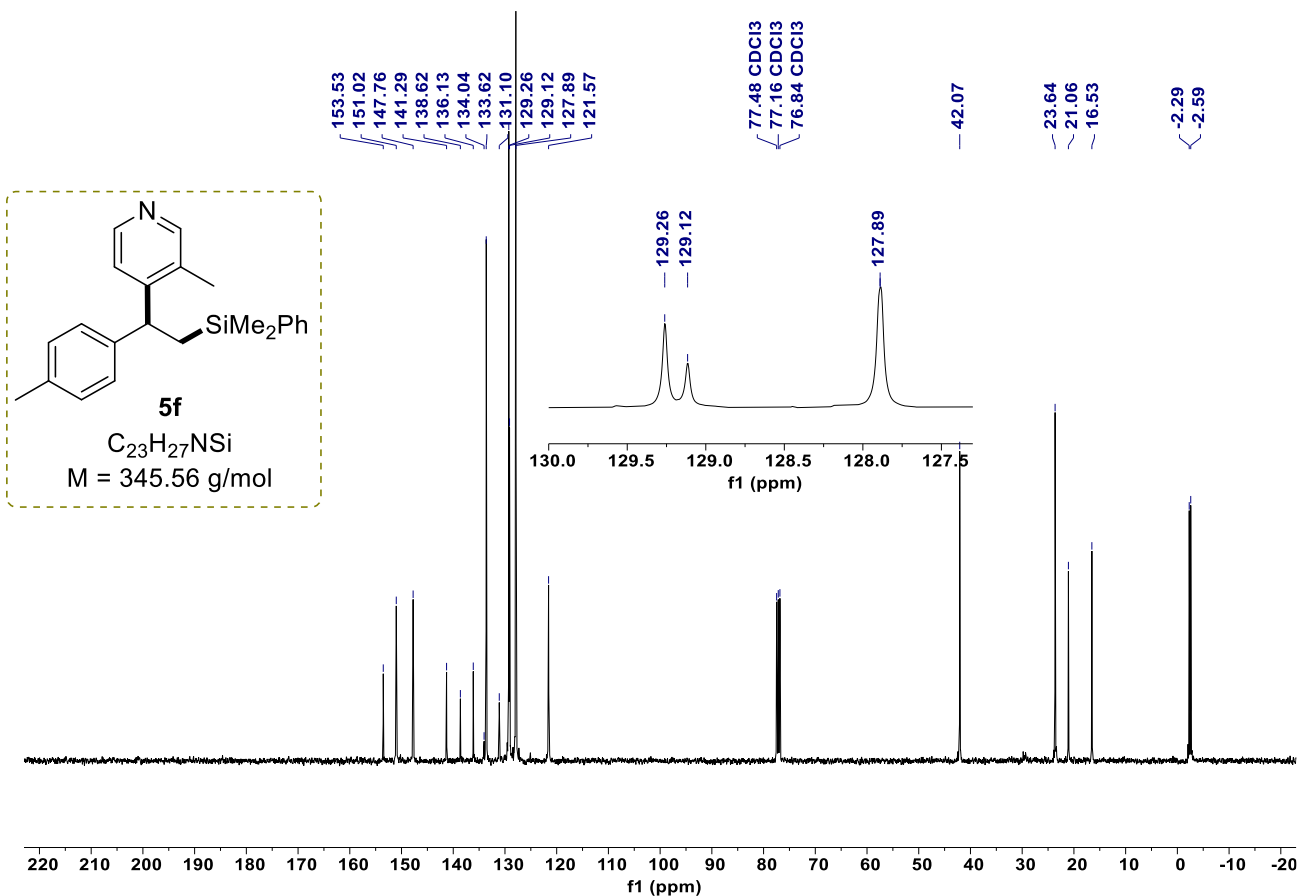

<sup>13</sup>C{<sup>1</sup>H} NMR spectrum (100 MHz, CDCl<sub>3</sub>) of compound **5f**.

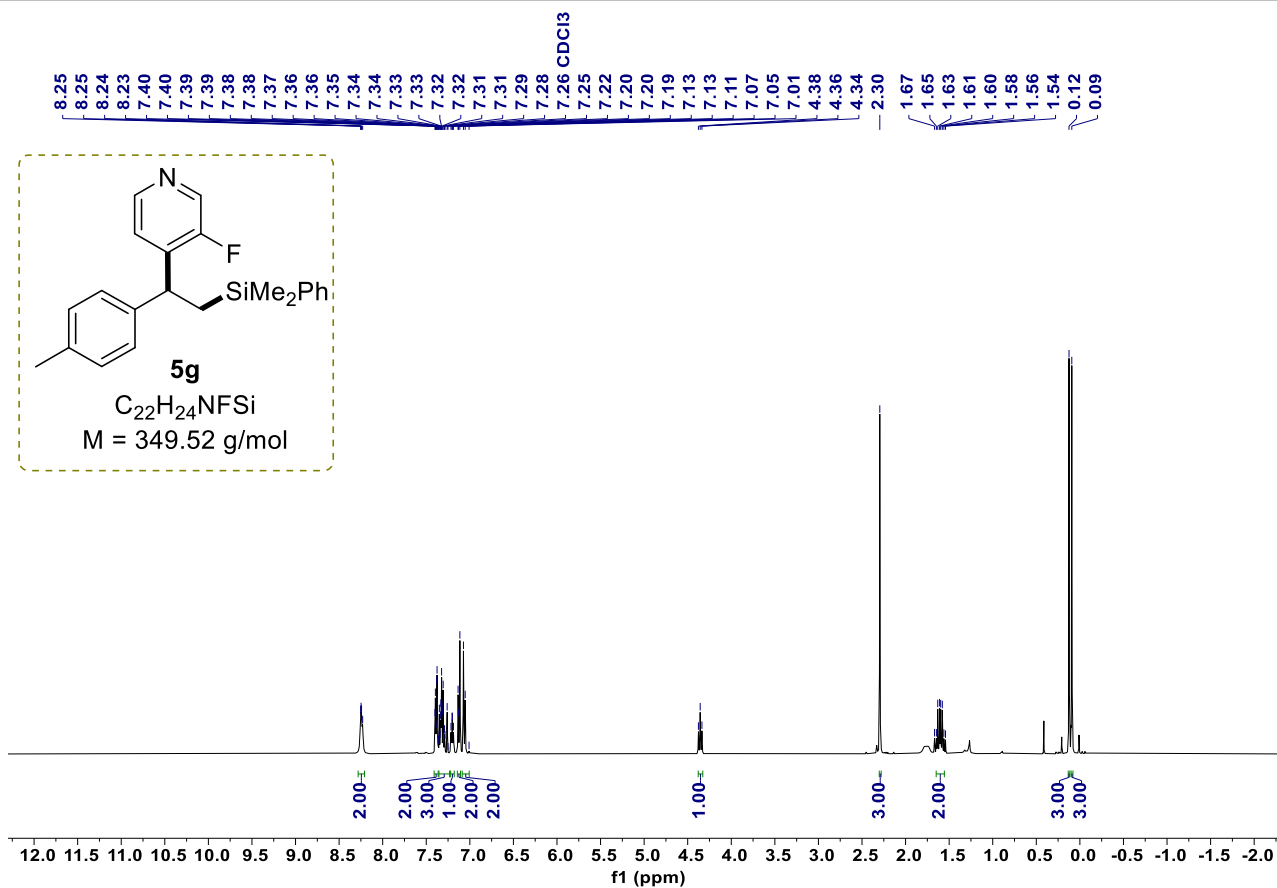

$^1H$  NMR spectrum (400 MHz,  $CDCl_3$ ) of compound **5g**.

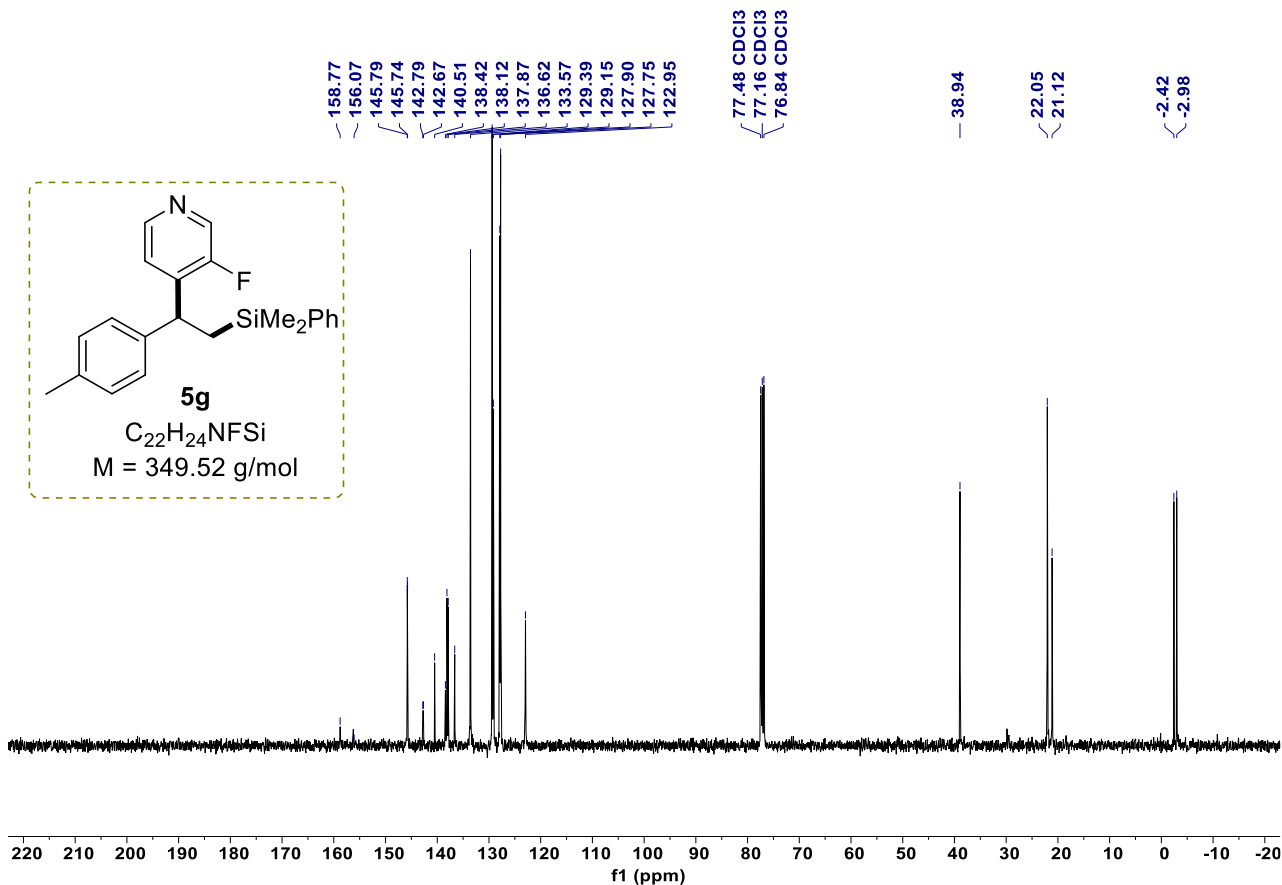

$^{13}C$  NMR spectrum (100 MHz,  $CDCl_3$ ) of compound **5g**.

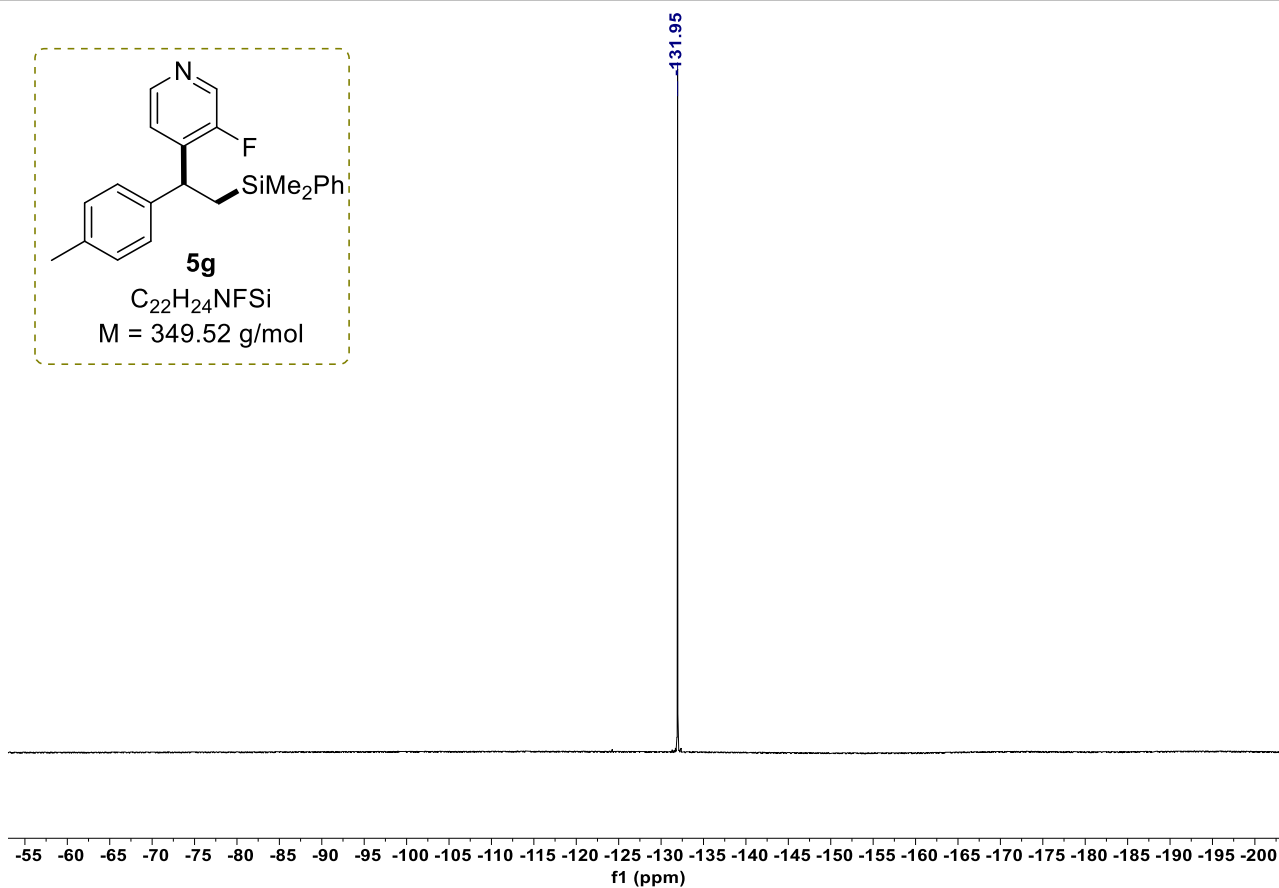

$^{19}F$  NMR spectrum (376 MHz,  $CDCl_3$ ) of compound **5g**.

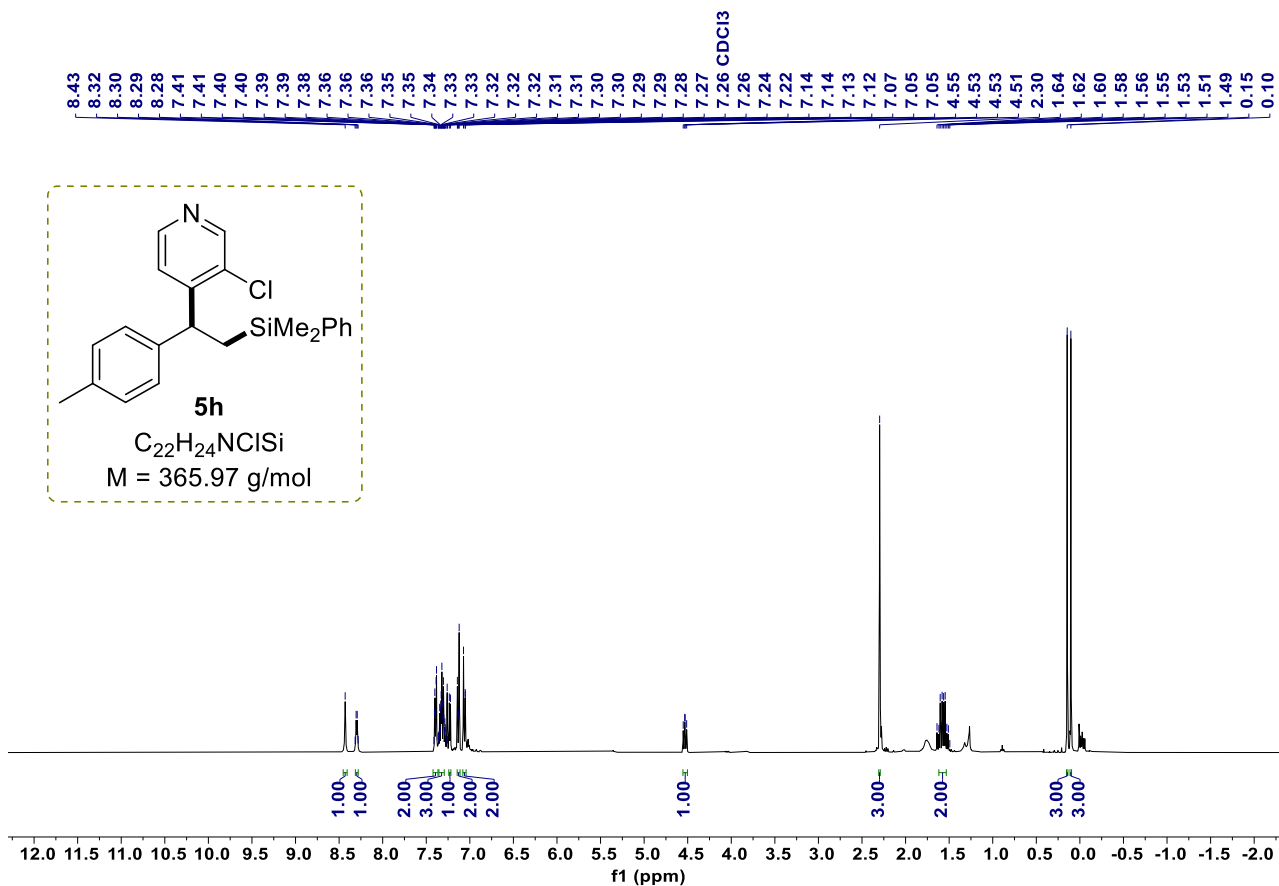

$^1H$  NMR spectrum (400 MHz,  $CDCl_3$ ) of compound **5h**.



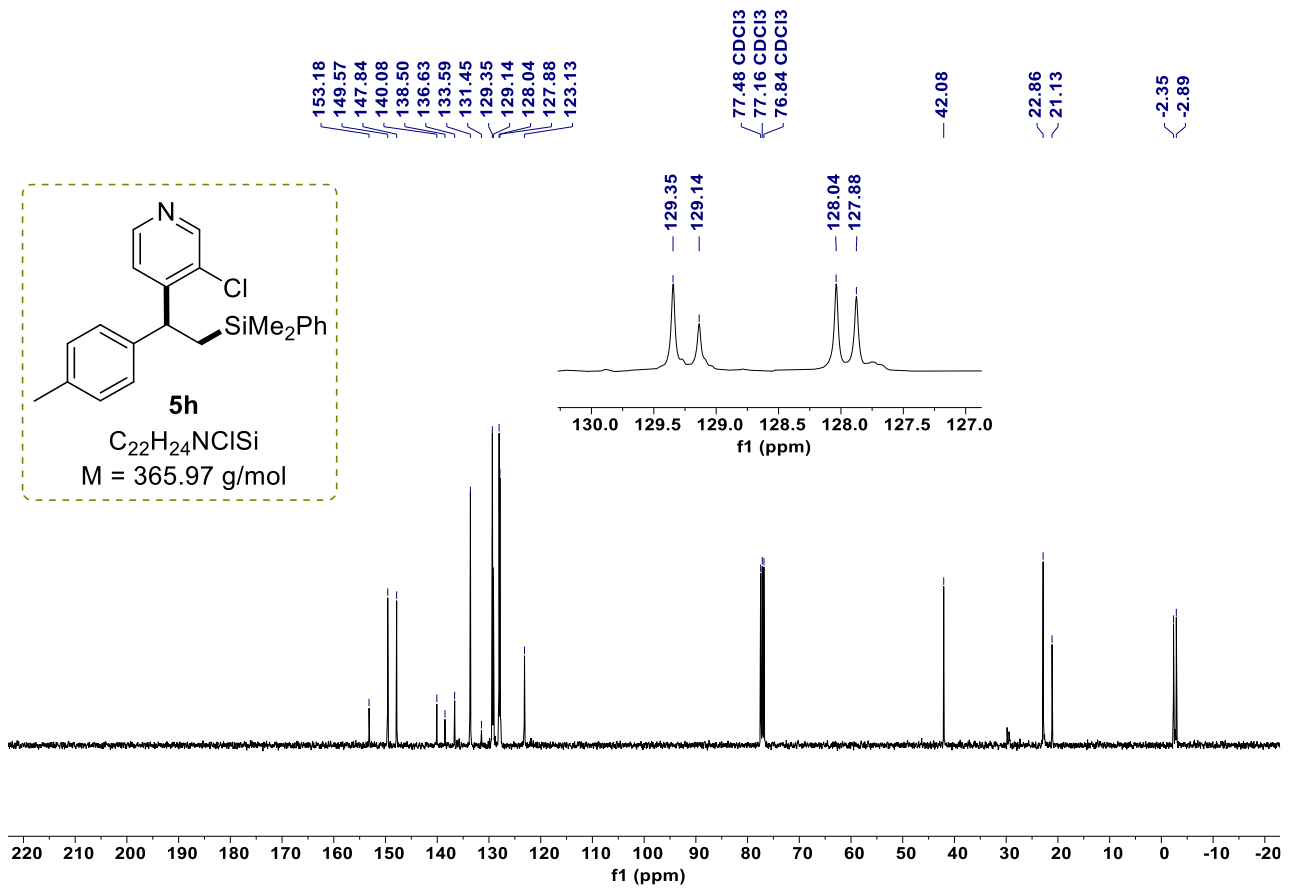

$^{13}C\{^1H\}$  NMR spectrum (100 MHz,  $CDCl_3$ ) of compound **5h**.

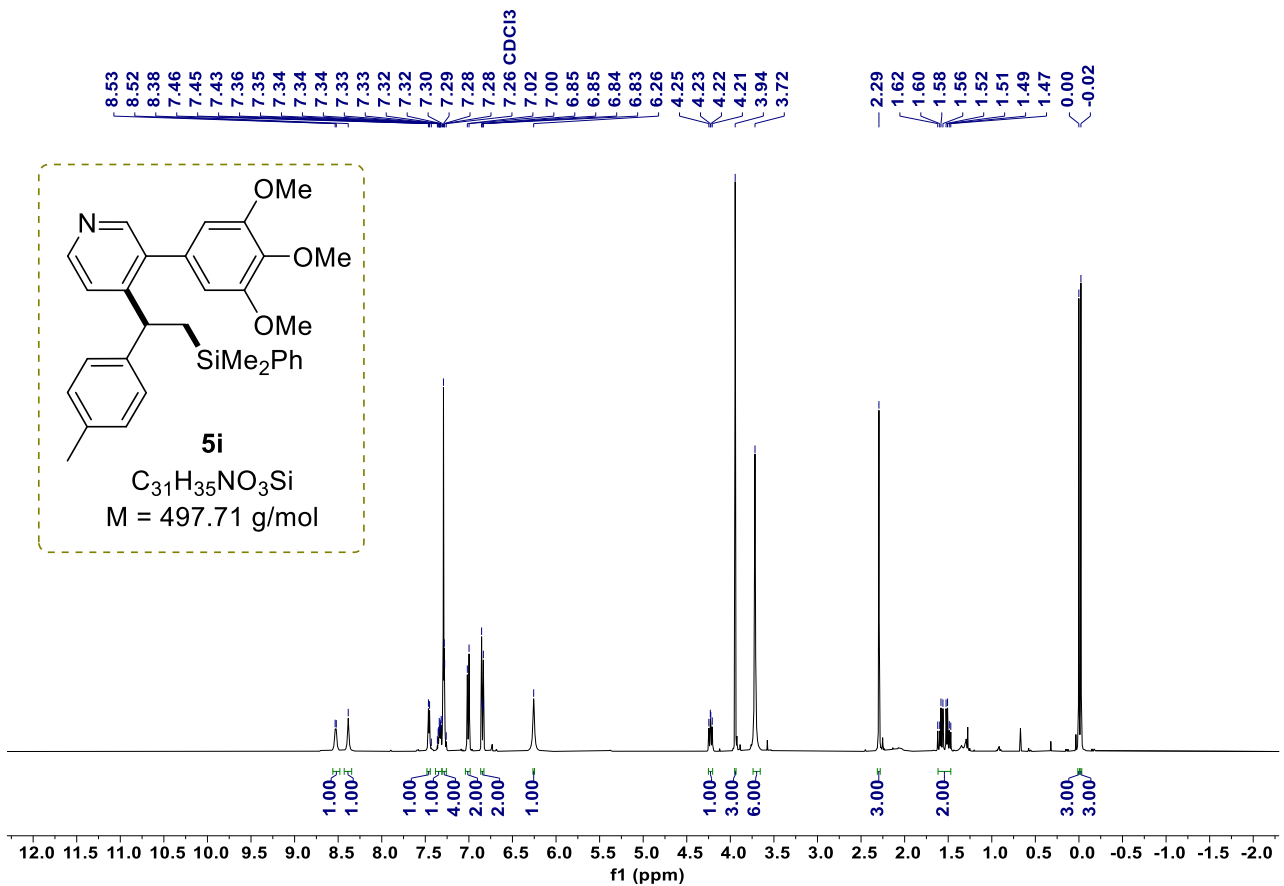

$^1H$  NMR spectrum (400 MHz,  $CDCl_3$ ) of compound **5i**.

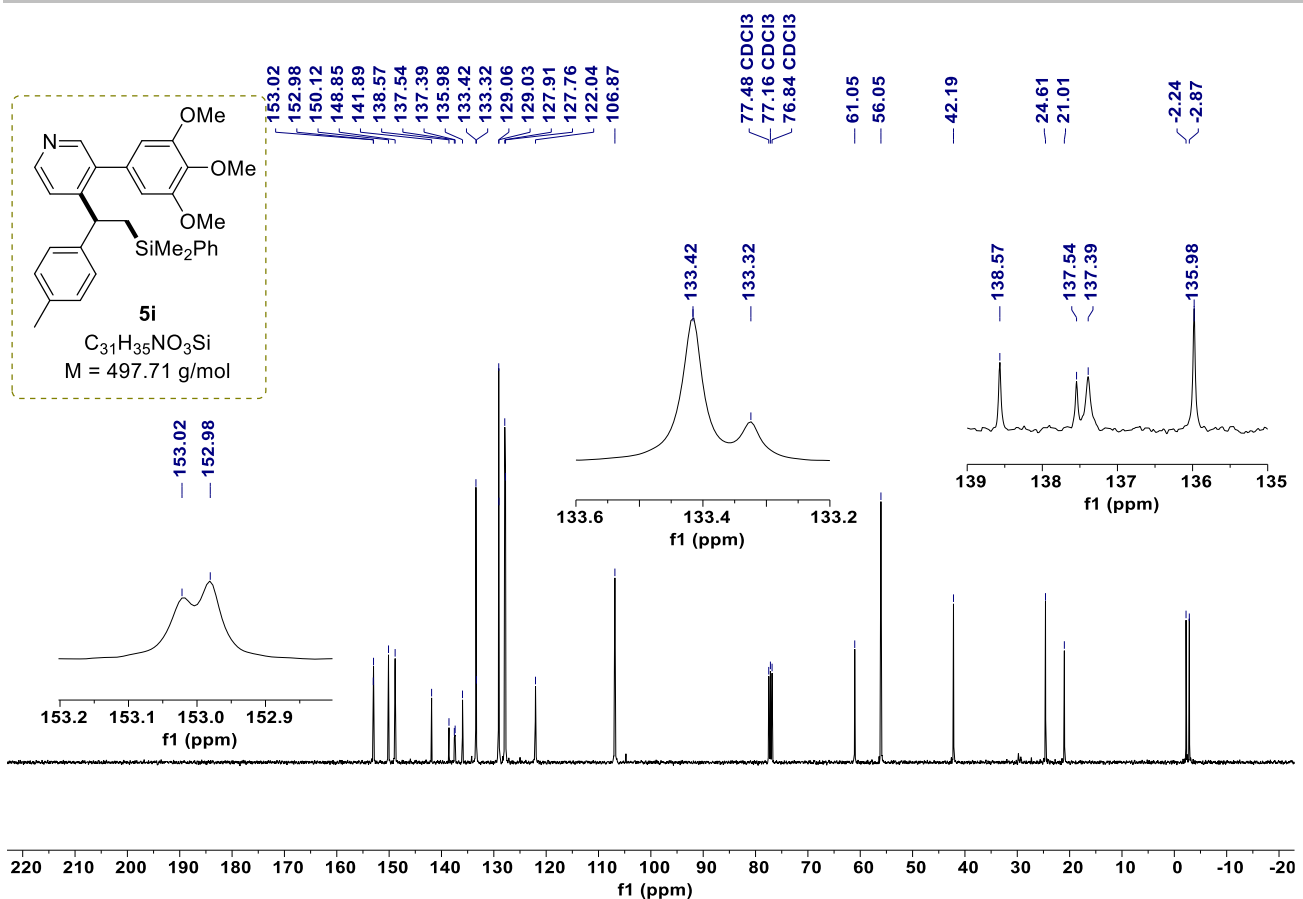

<sup>13</sup>C{<sup>1</sup>H} NMR spectrum (100 MHz, CDCl<sub>3</sub>) of compound **5i**.

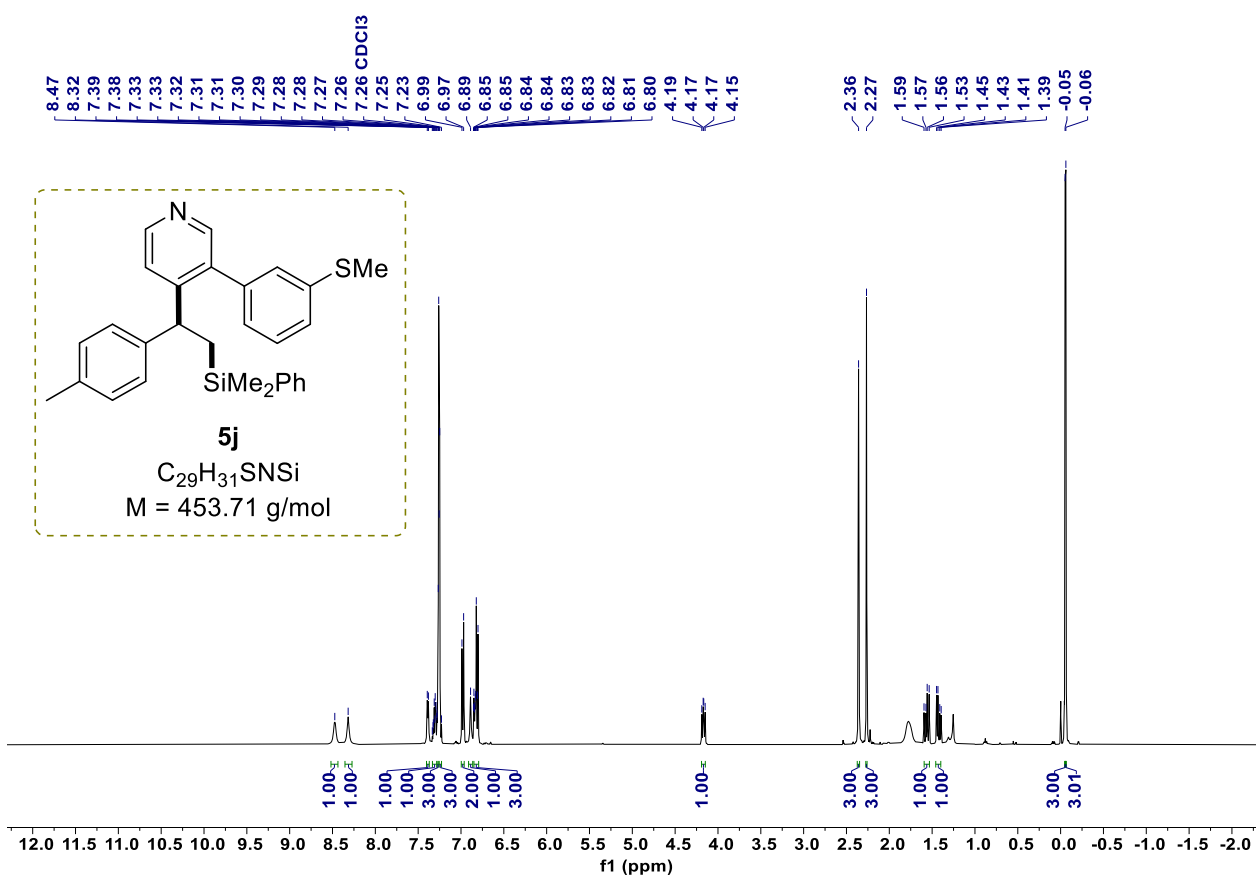

<sup>1</sup>H NMR spectrum (400 MHz, CDCl<sub>3</sub>) of compound **5j**.

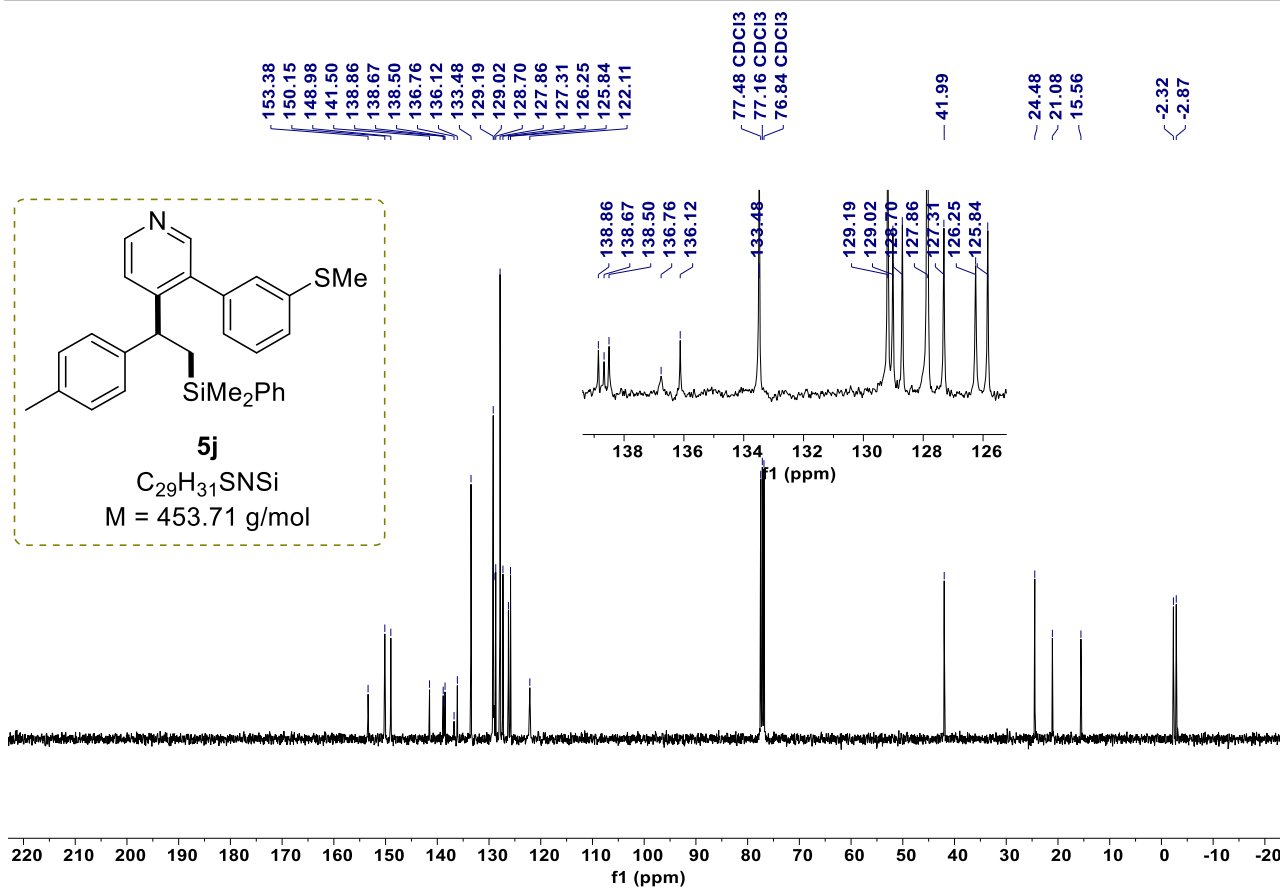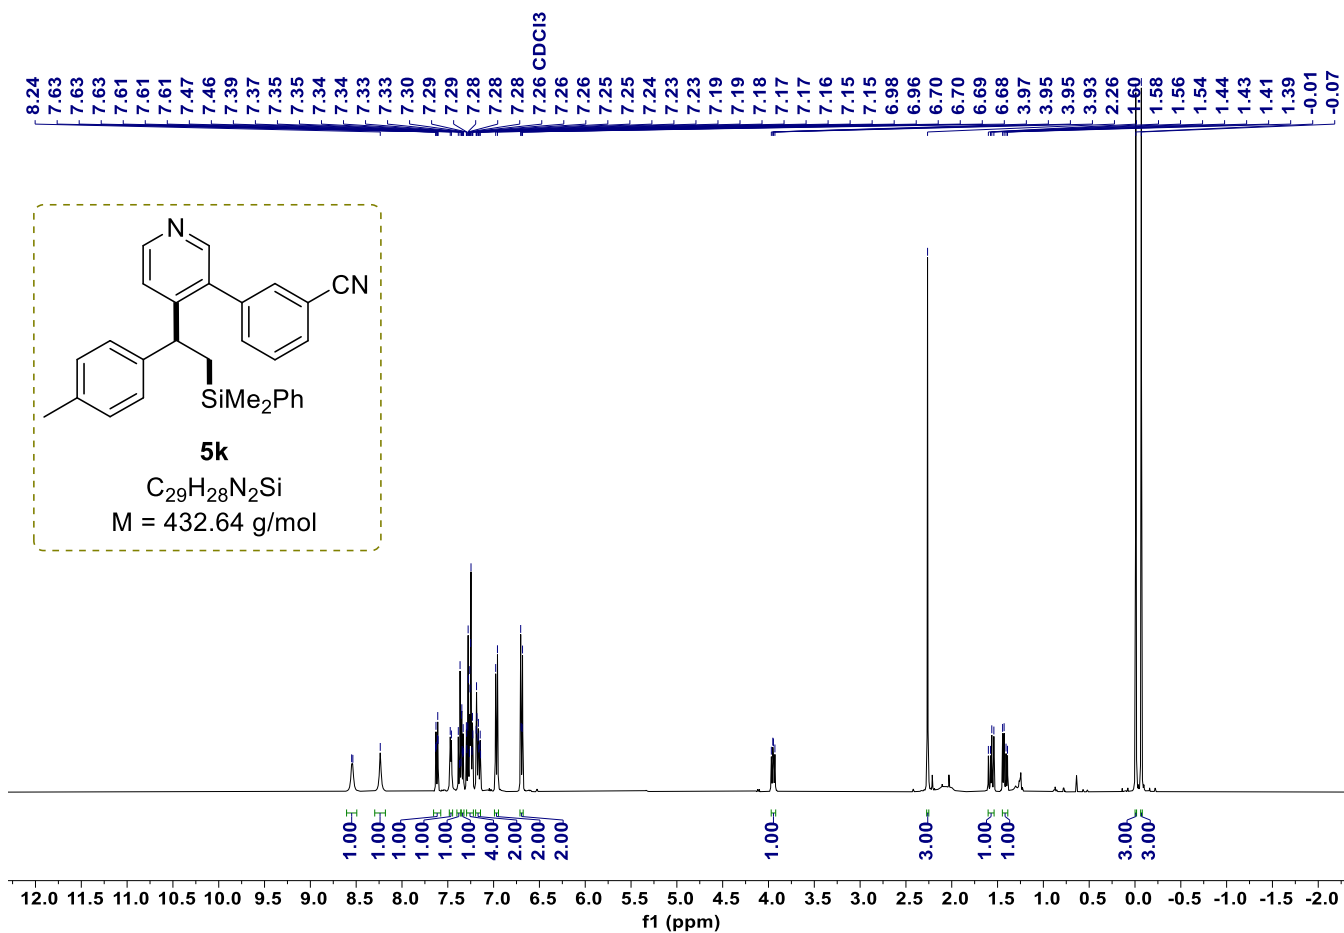



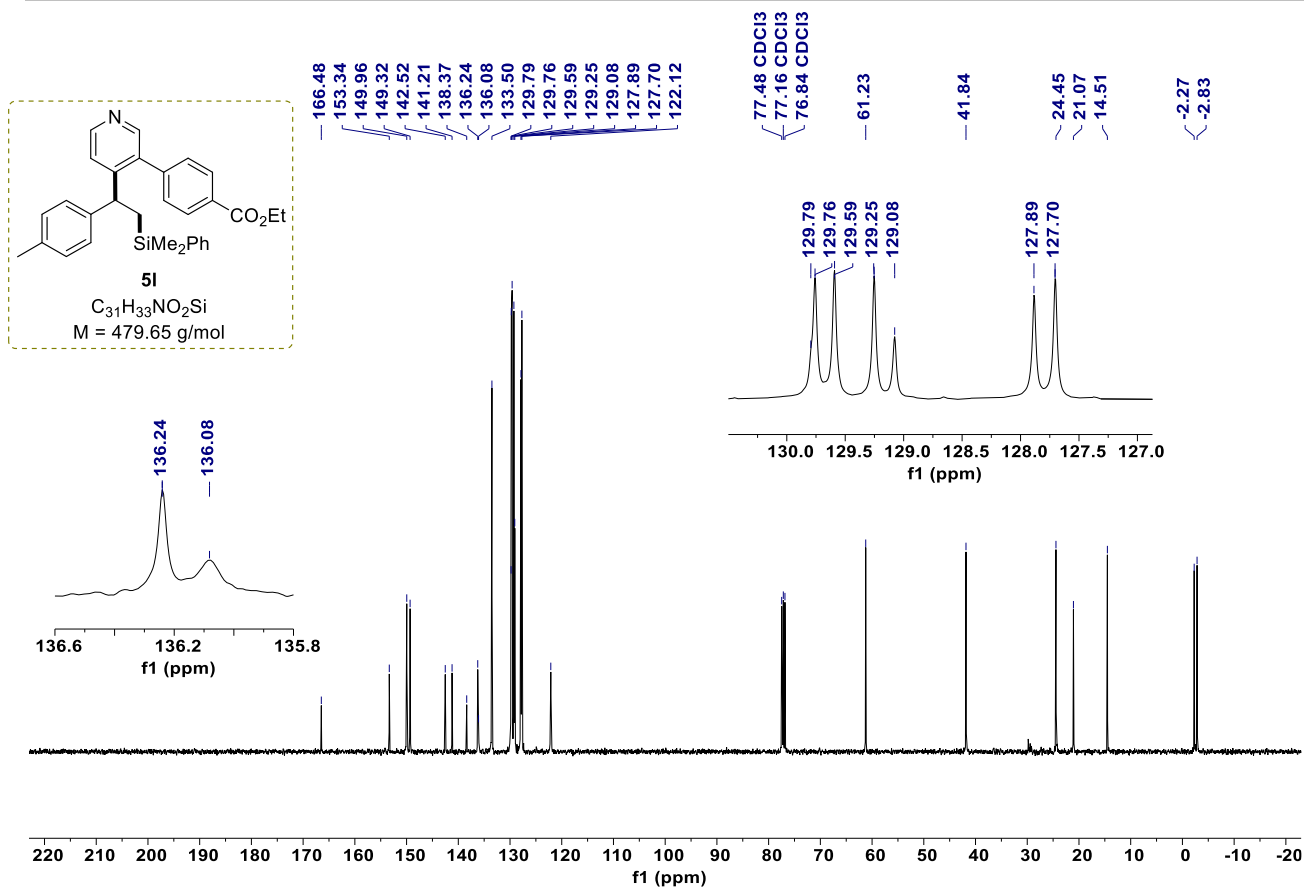

$^{13}C\{^1H\}$  NMR spectrum (100 MHz,  $CDCl_3$ ) of compound **5l**.

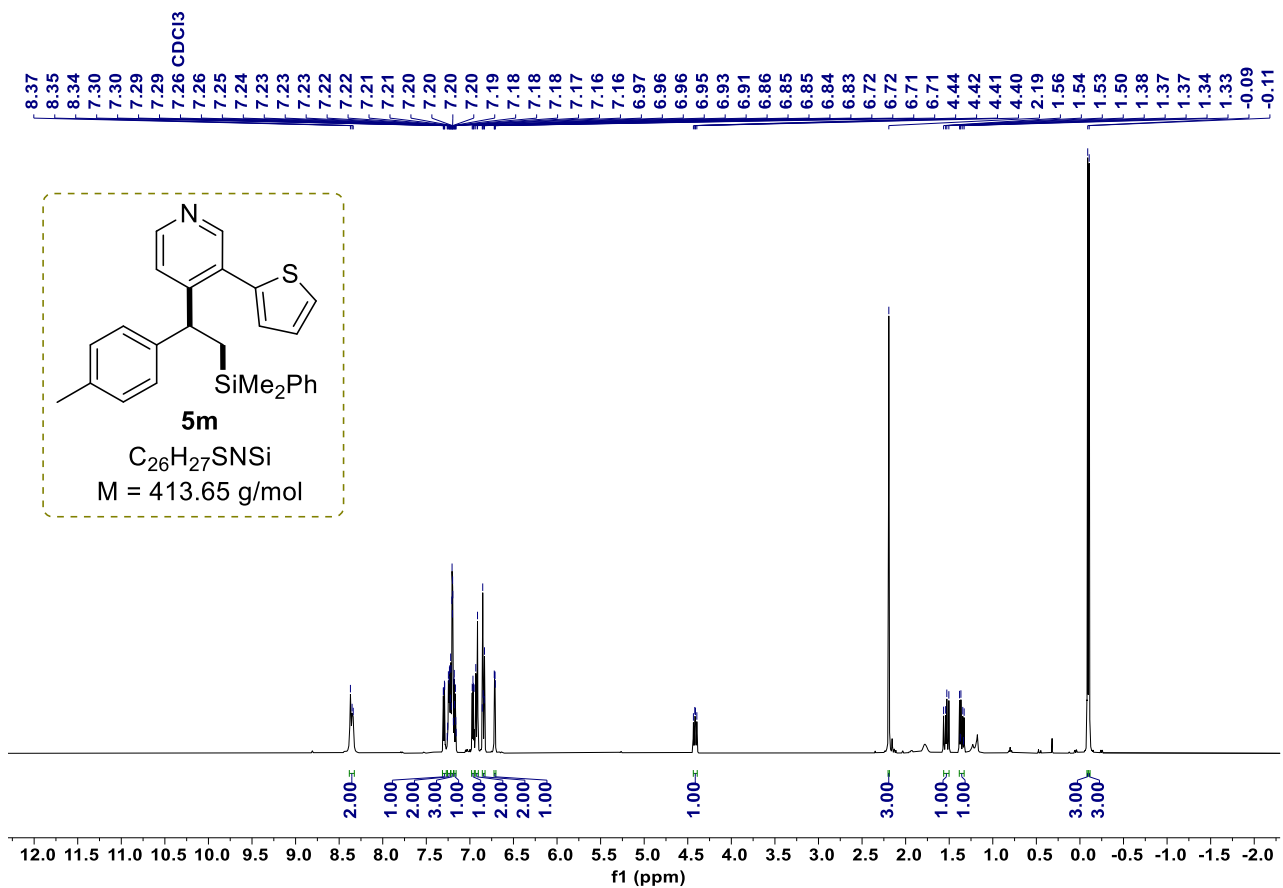

$^1H$  NMR spectrum (400 MHz,  $CDCl_3$ ) of compound **5m**.

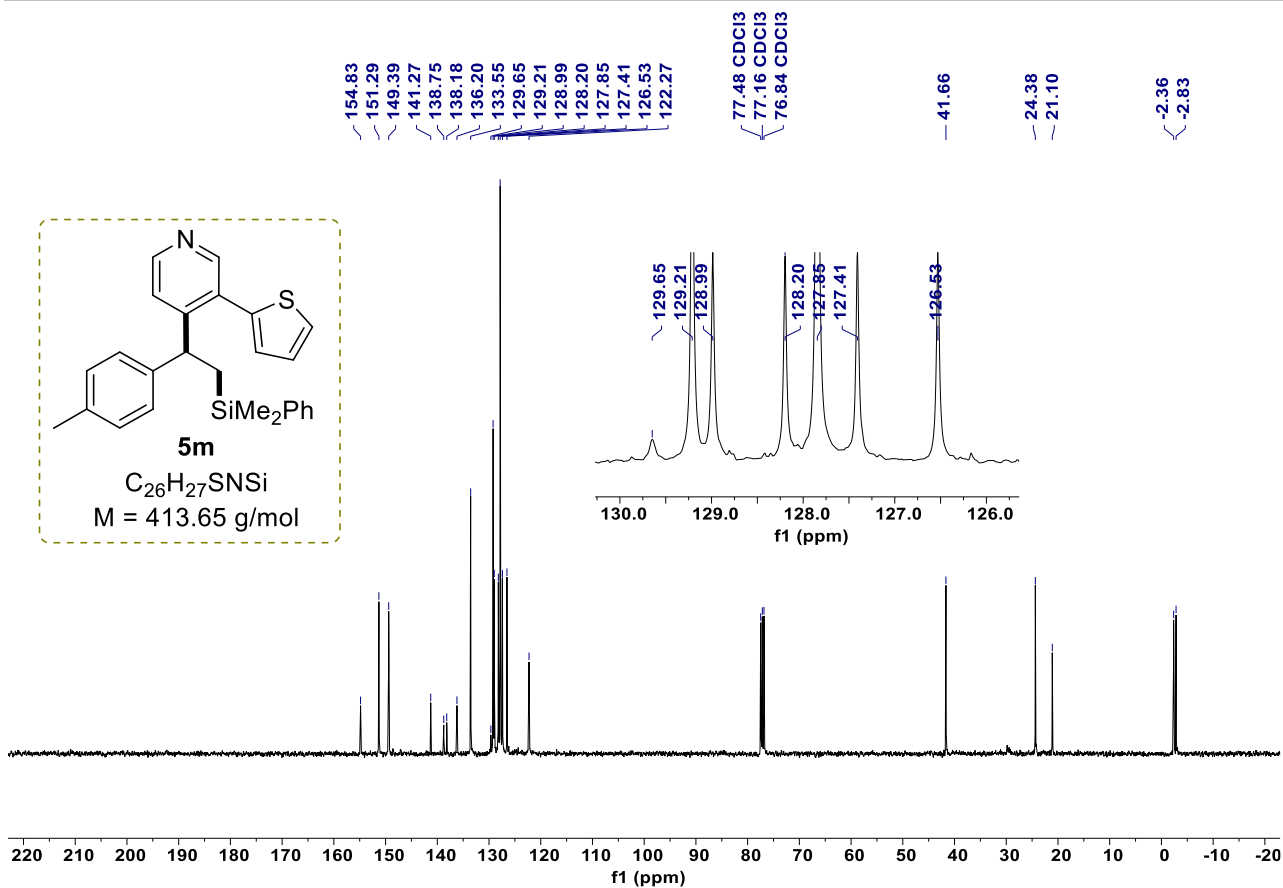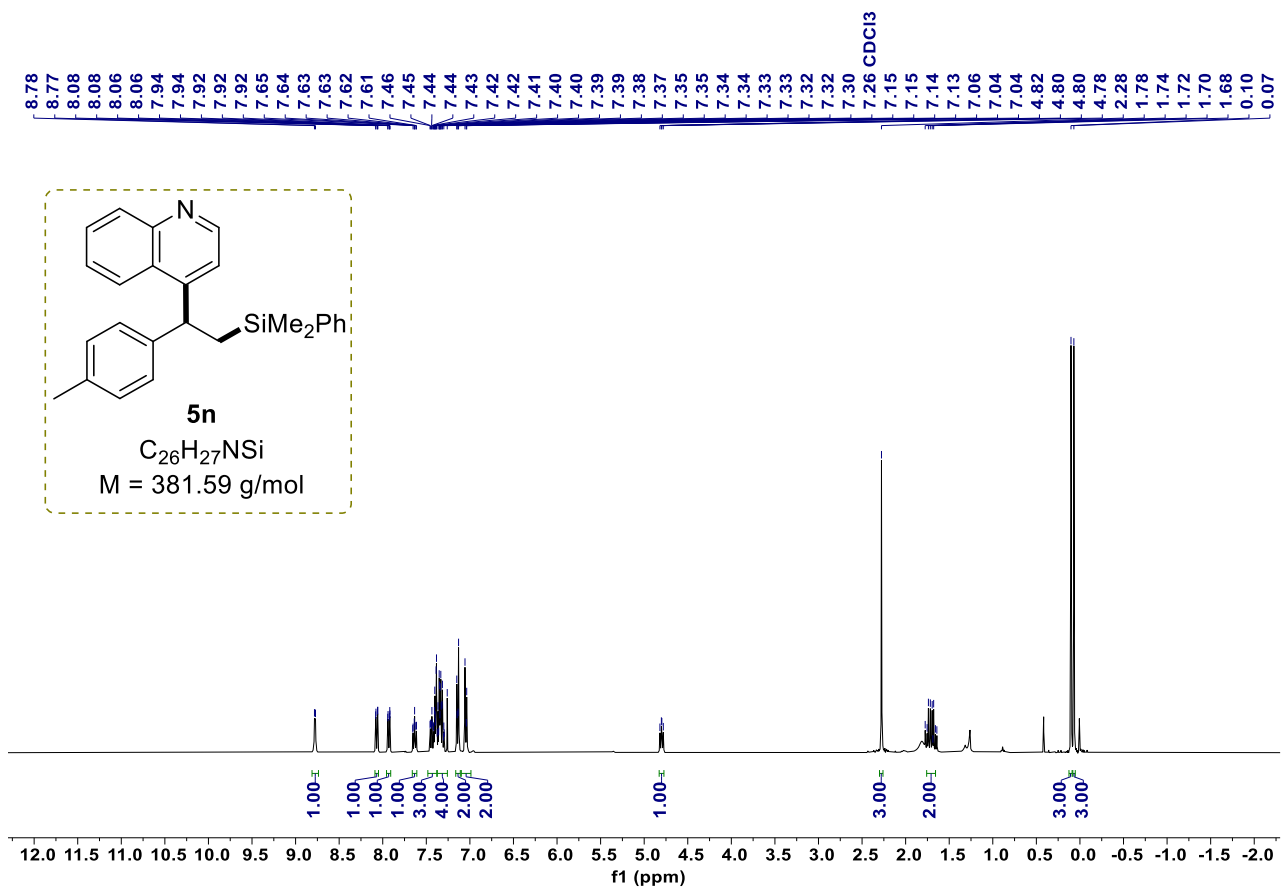

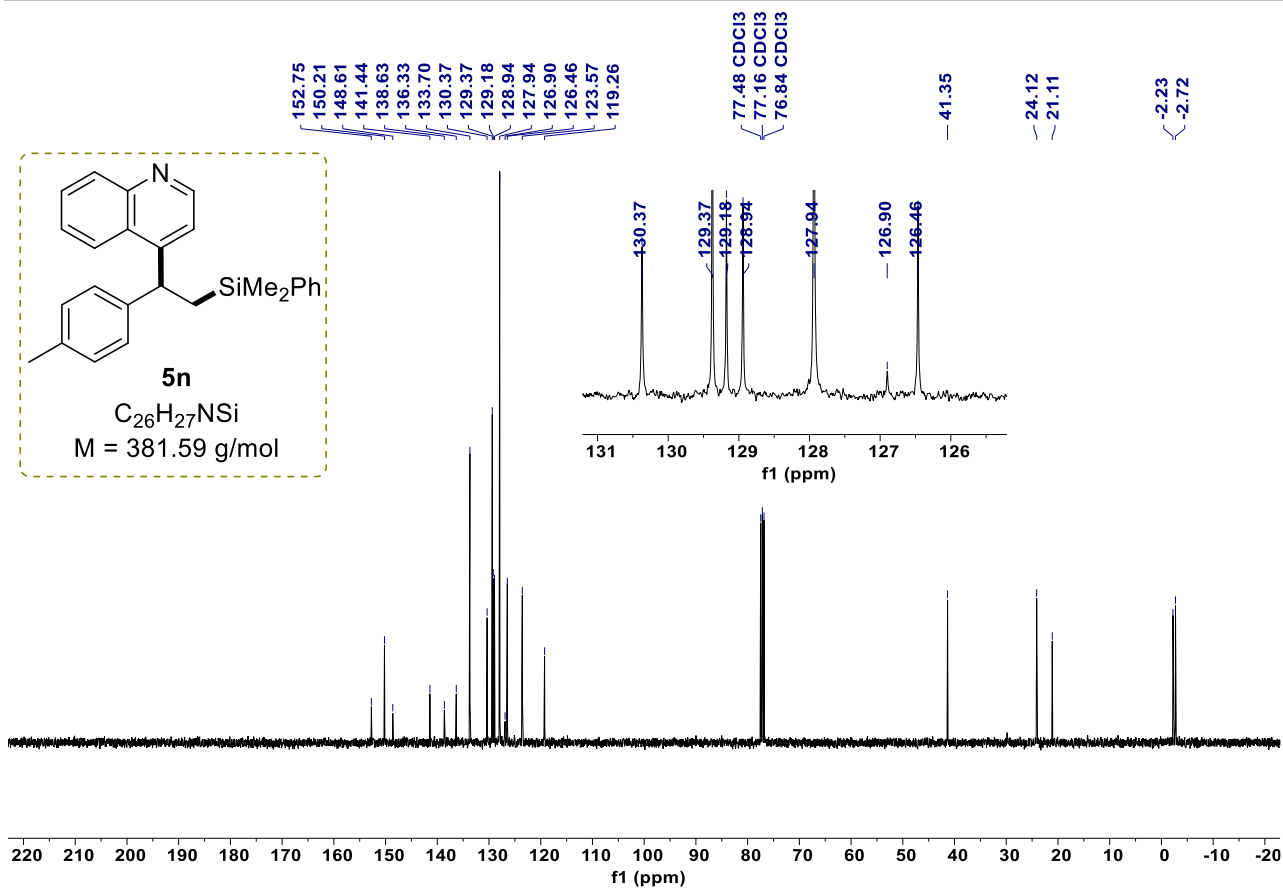

$^{13}C$  NMR spectrum (100 MHz,  $CDCl_3$ ) of compound **5n**.

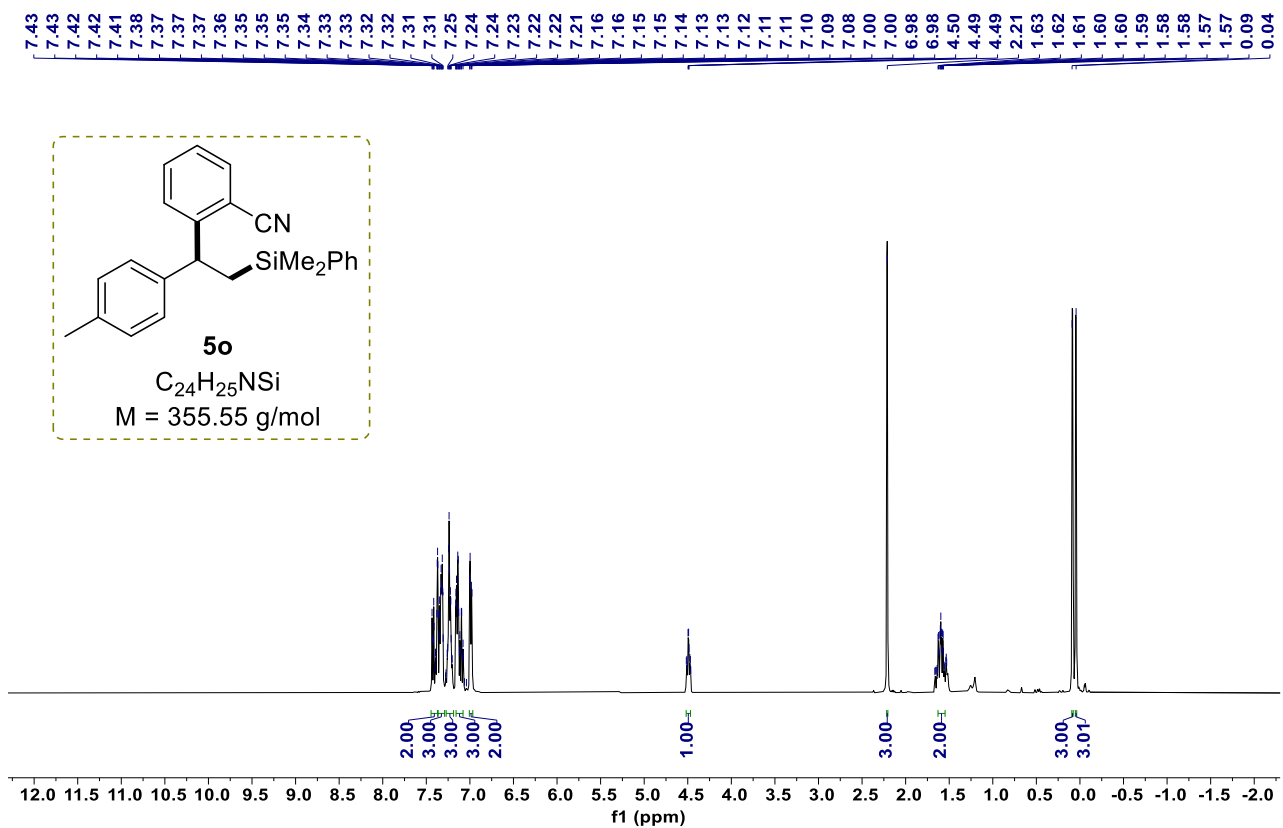

$^1H$  NMR spectrum (400 MHz,  $CDCl_3$ ) of compound **5o**.

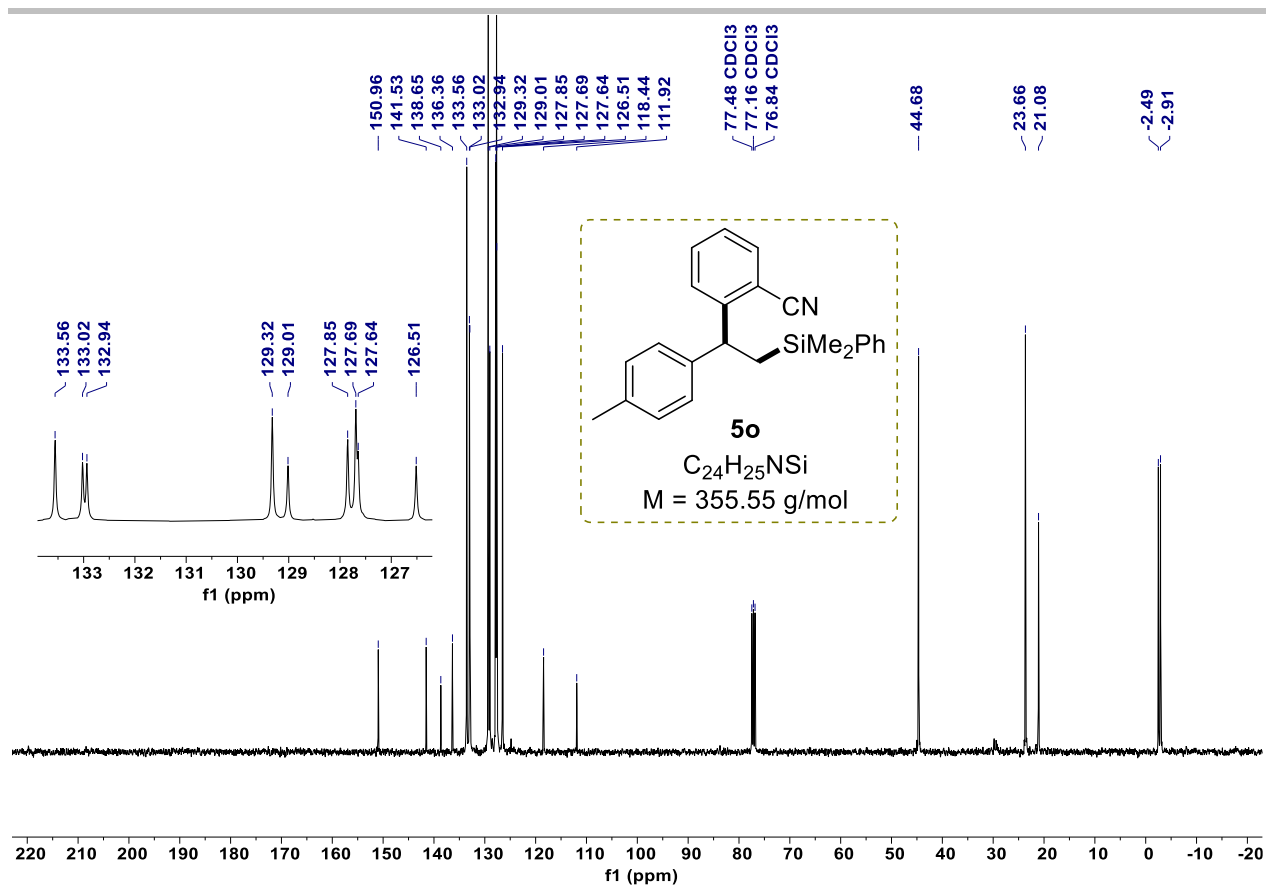

$^{13}\text{C}\{^1\text{H}\}$  NMR spectrum (100 MHz,  $\text{CDCl}_3$ ) of compound **5o**.

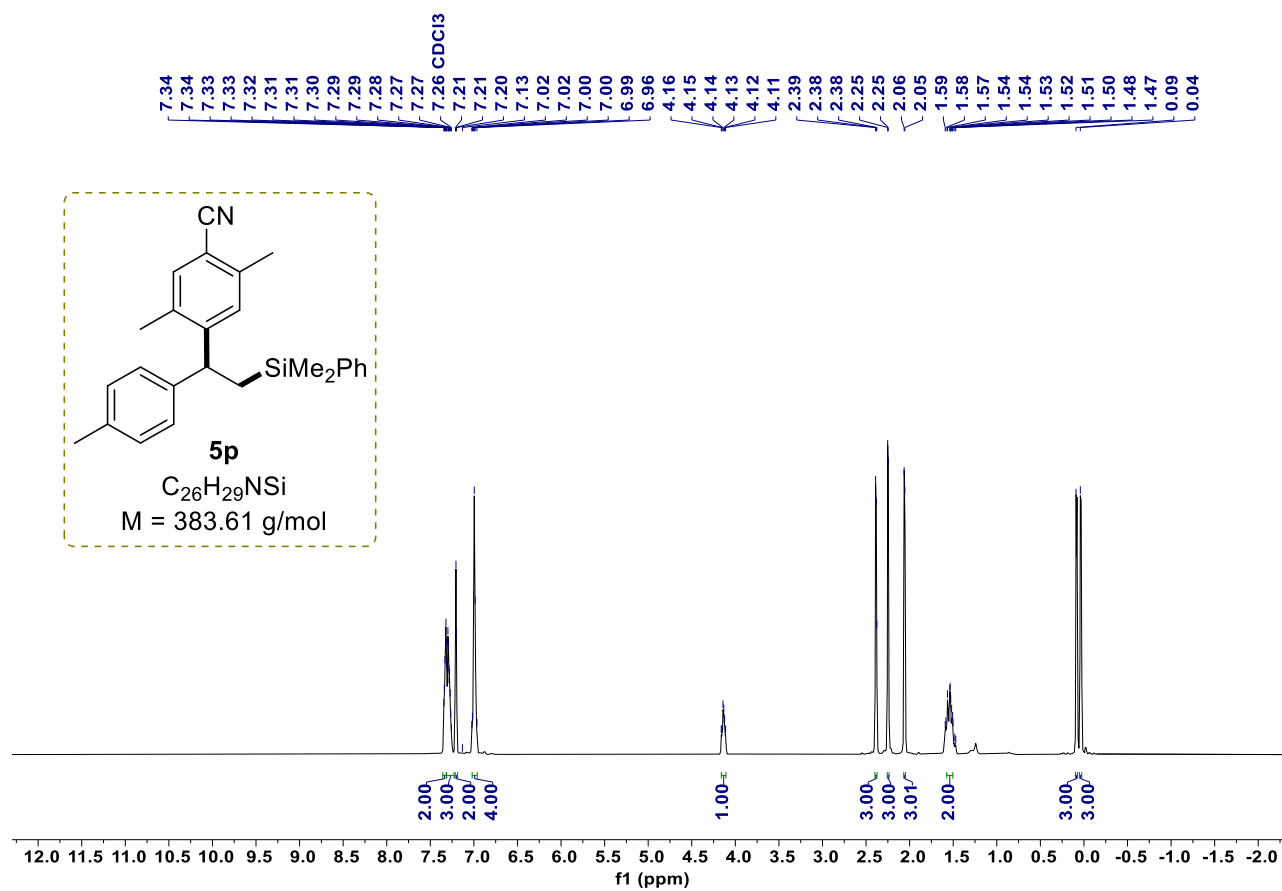

$^1\text{H}$  NMR spectrum (400 MHz,  $\text{CDCl}_3$ ) of compound **5p**.



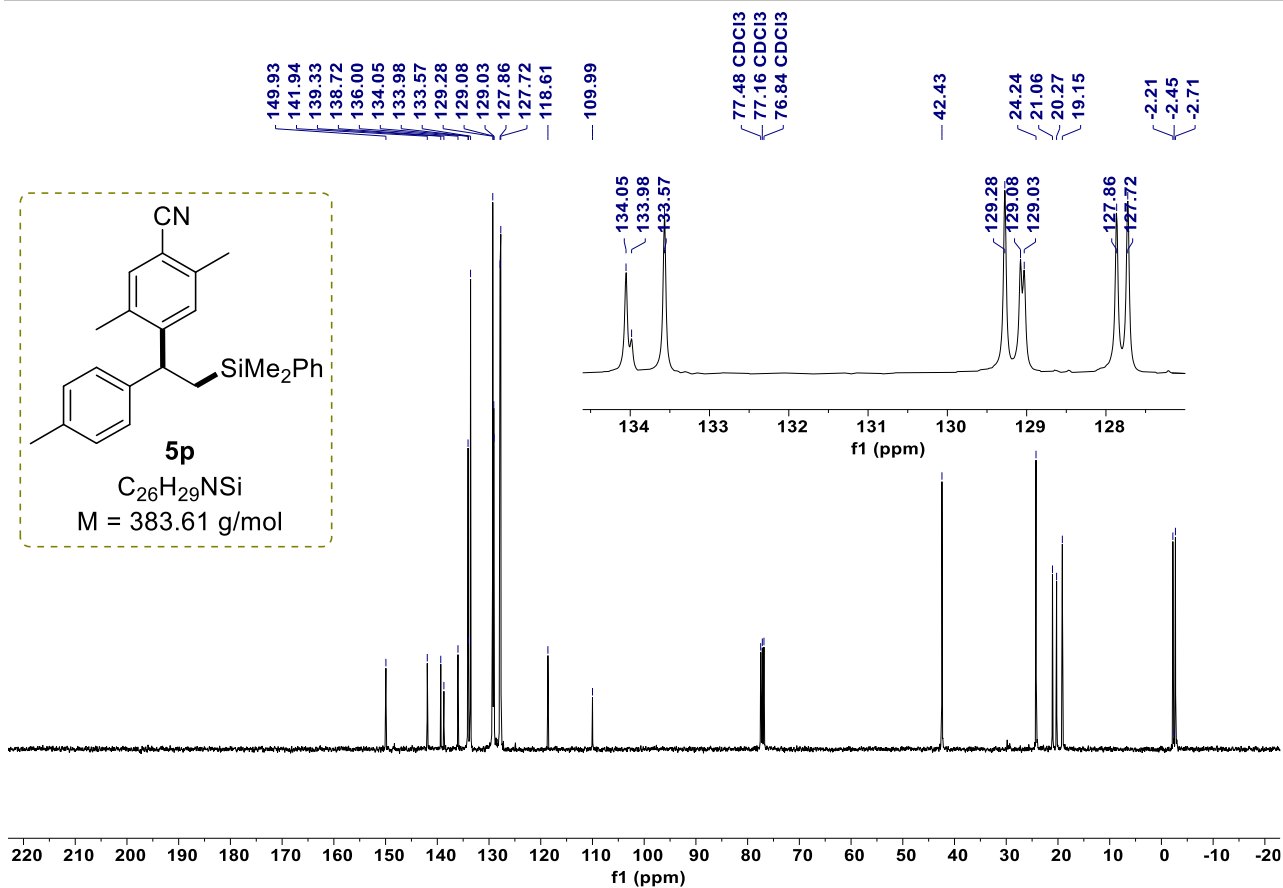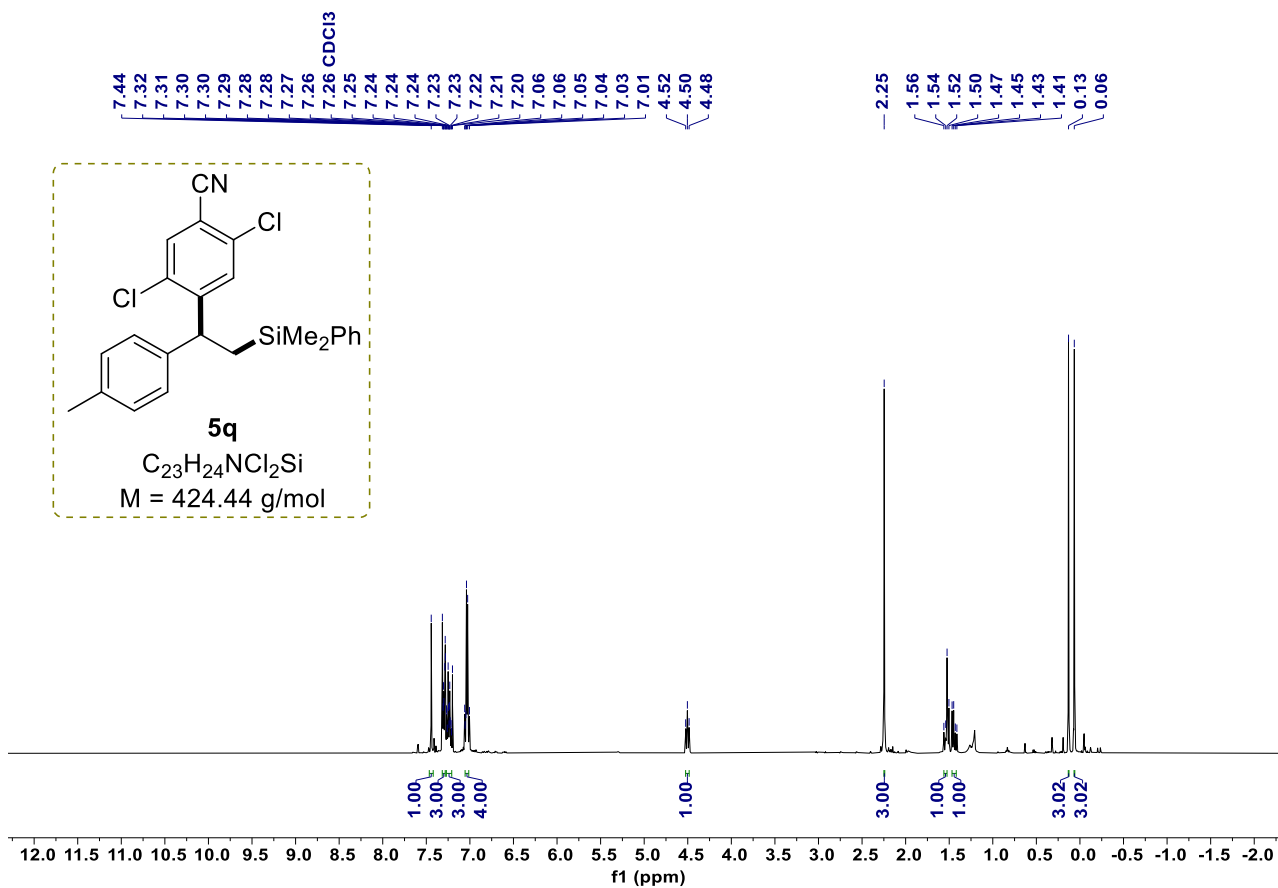

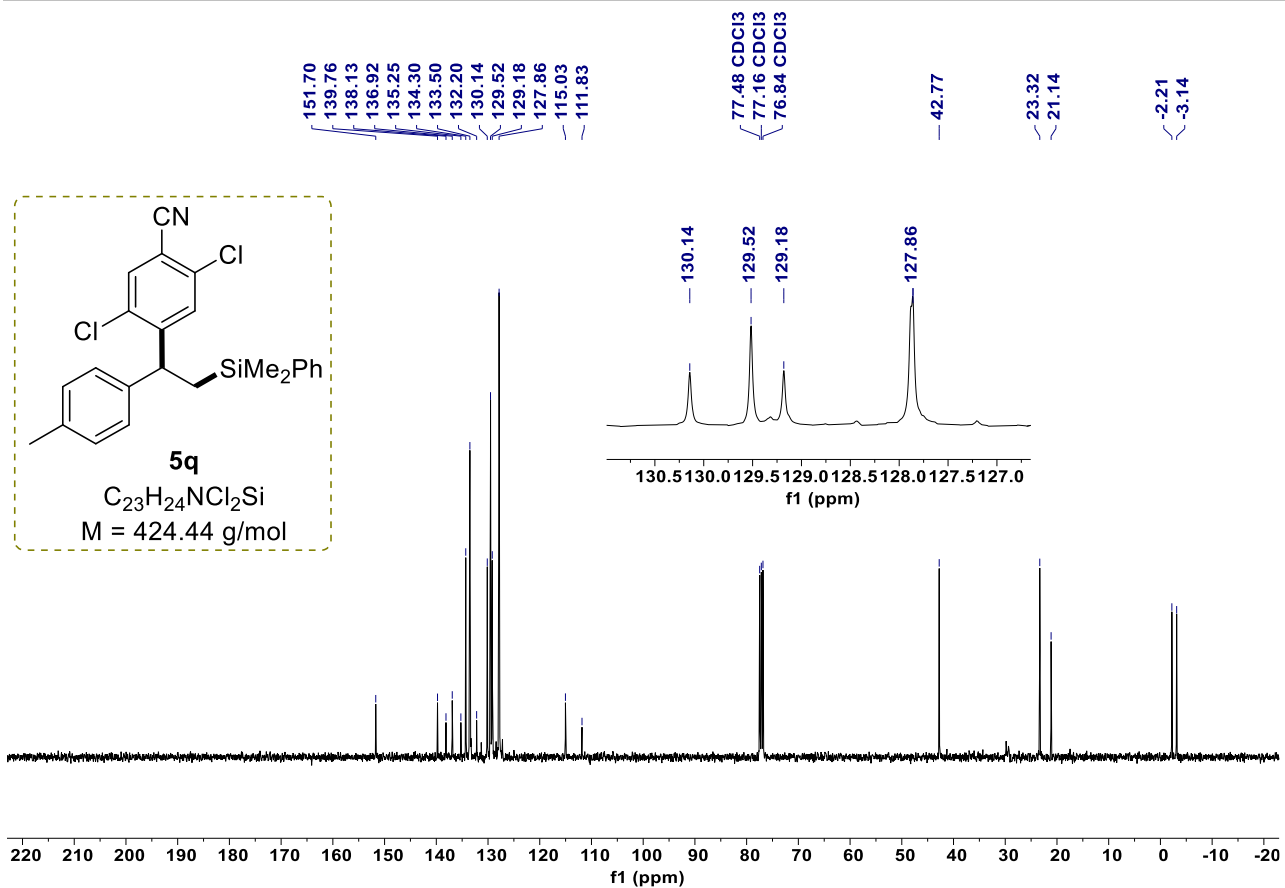

$^{13}\text{C}\{^1\text{H}\}$  NMR spectrum (100 MHz,  $\text{CDCl}_3$ ) of compound **5q**.

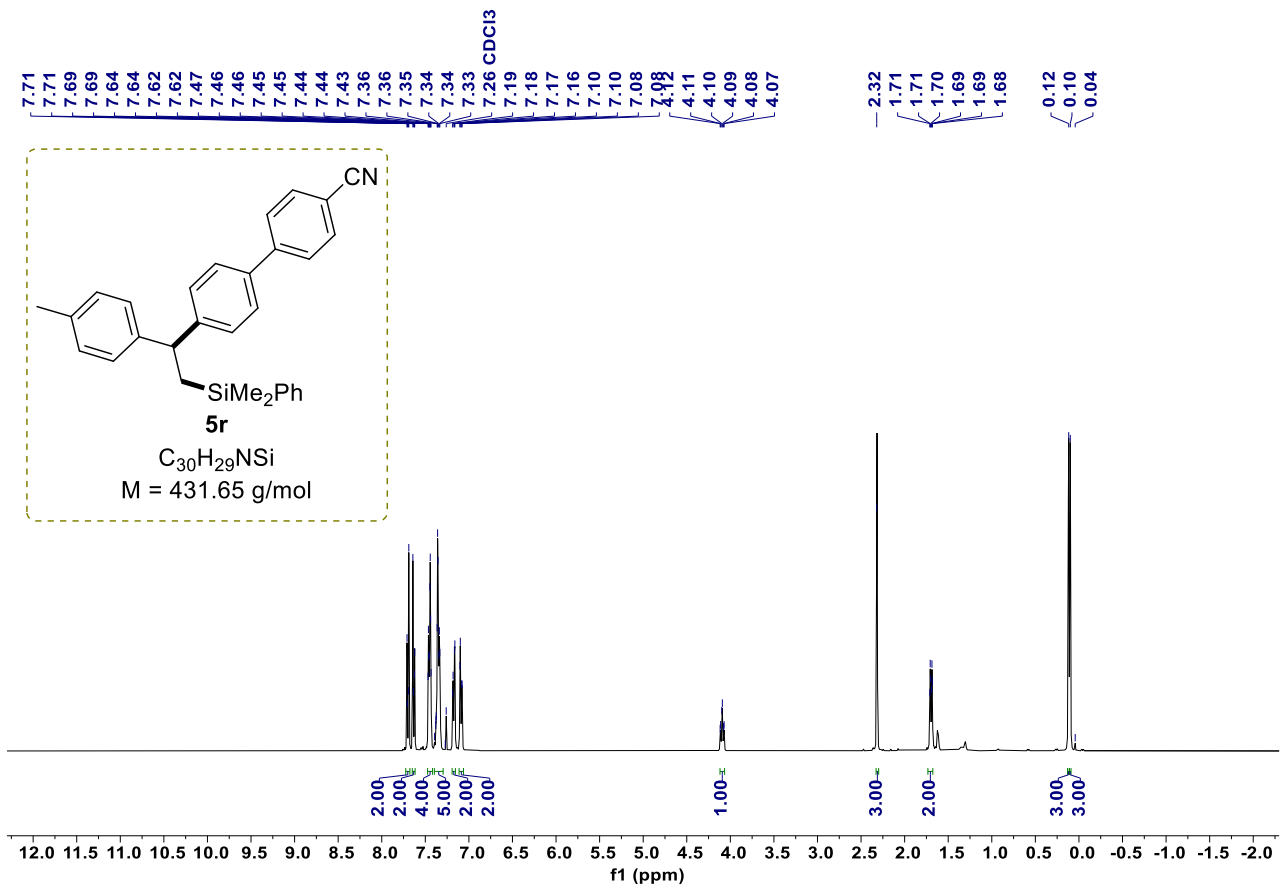

$^1\text{H}$  NMR spectrum (400 MHz,  $\text{CDCl}_3$ ) of compound **5r**.

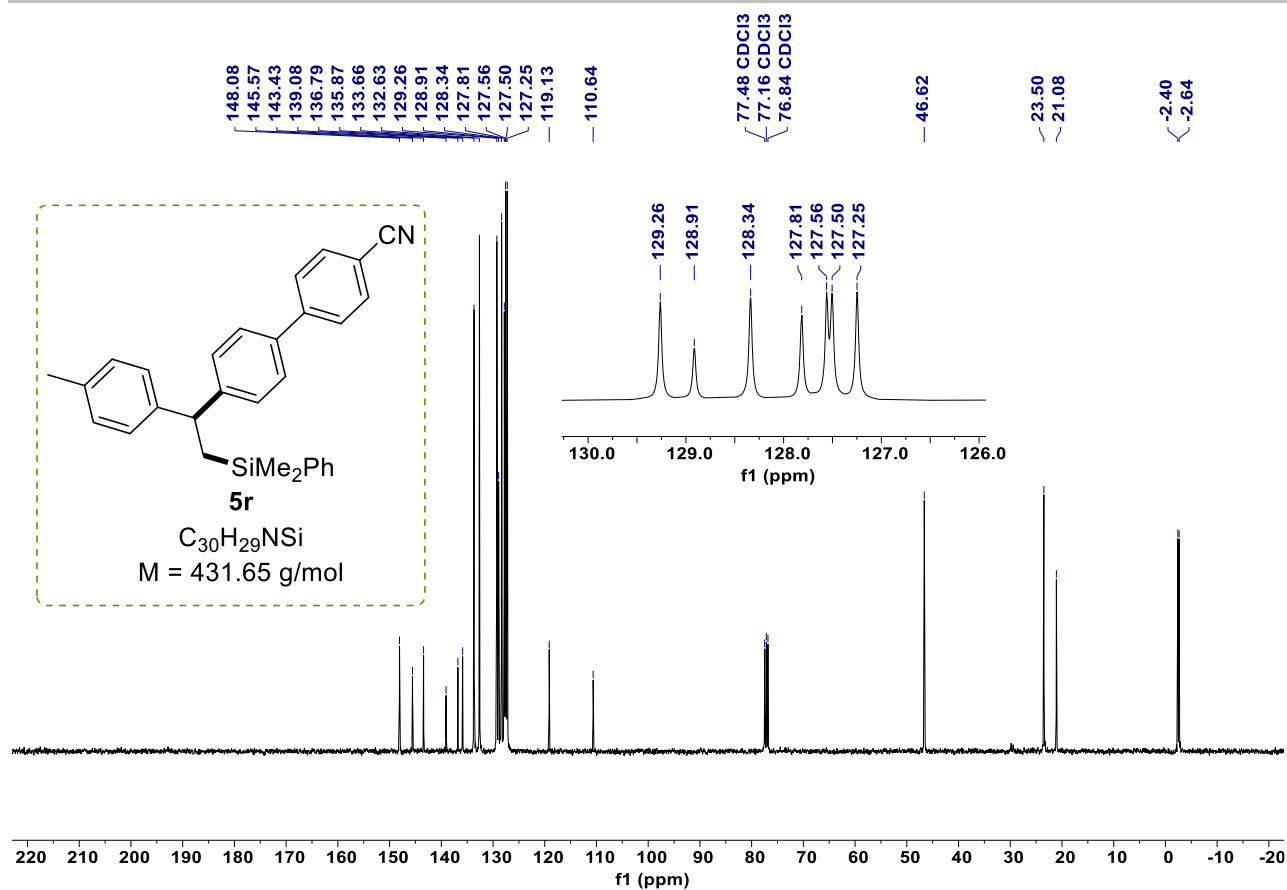

$^{13}C\{^1H\}$  NMR spectrum (100 MHz,  $CDCl_3$ ) of compound **5r**.

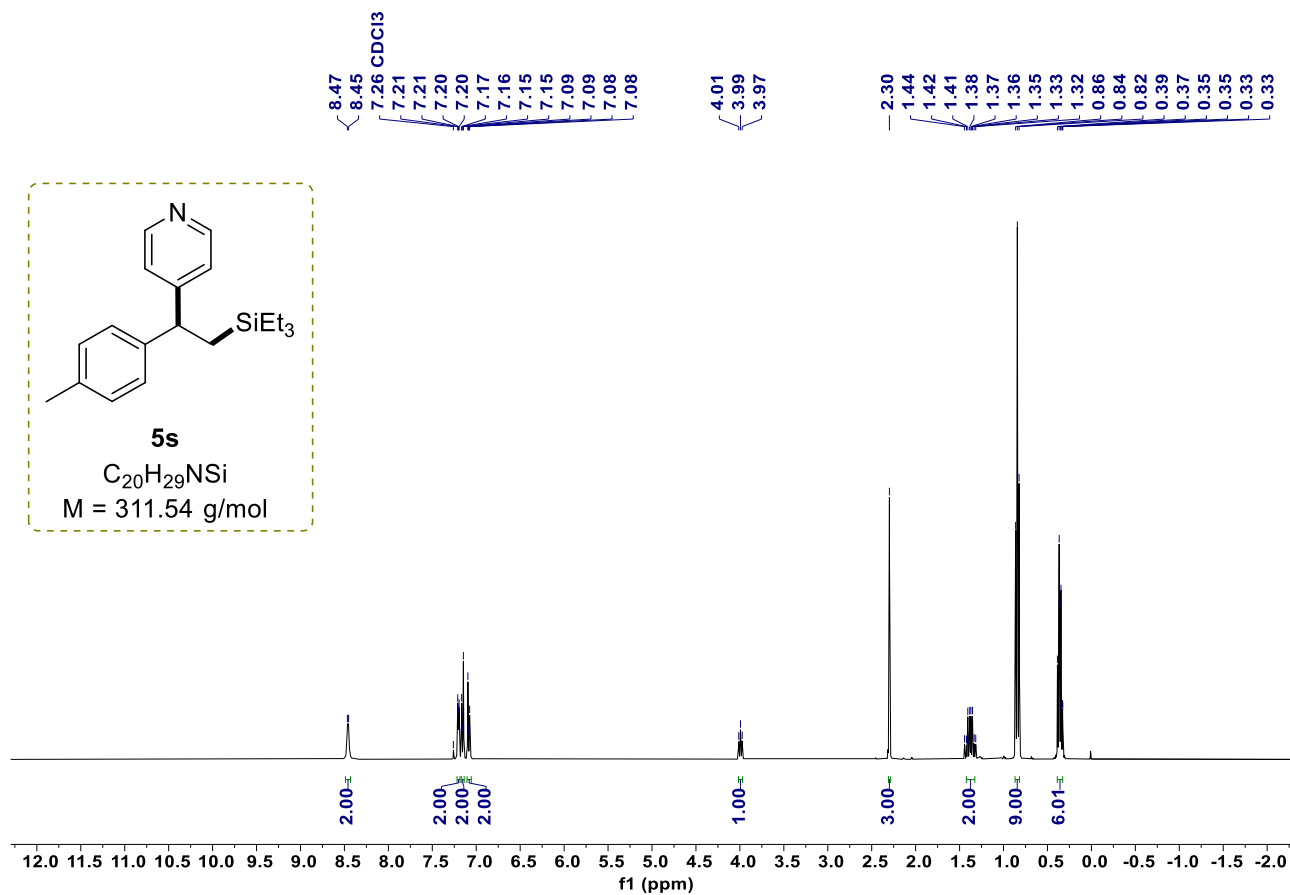

$^1H$  NMR spectrum (400 MHz,  $CDCl_3$ ) of compound **5s**.

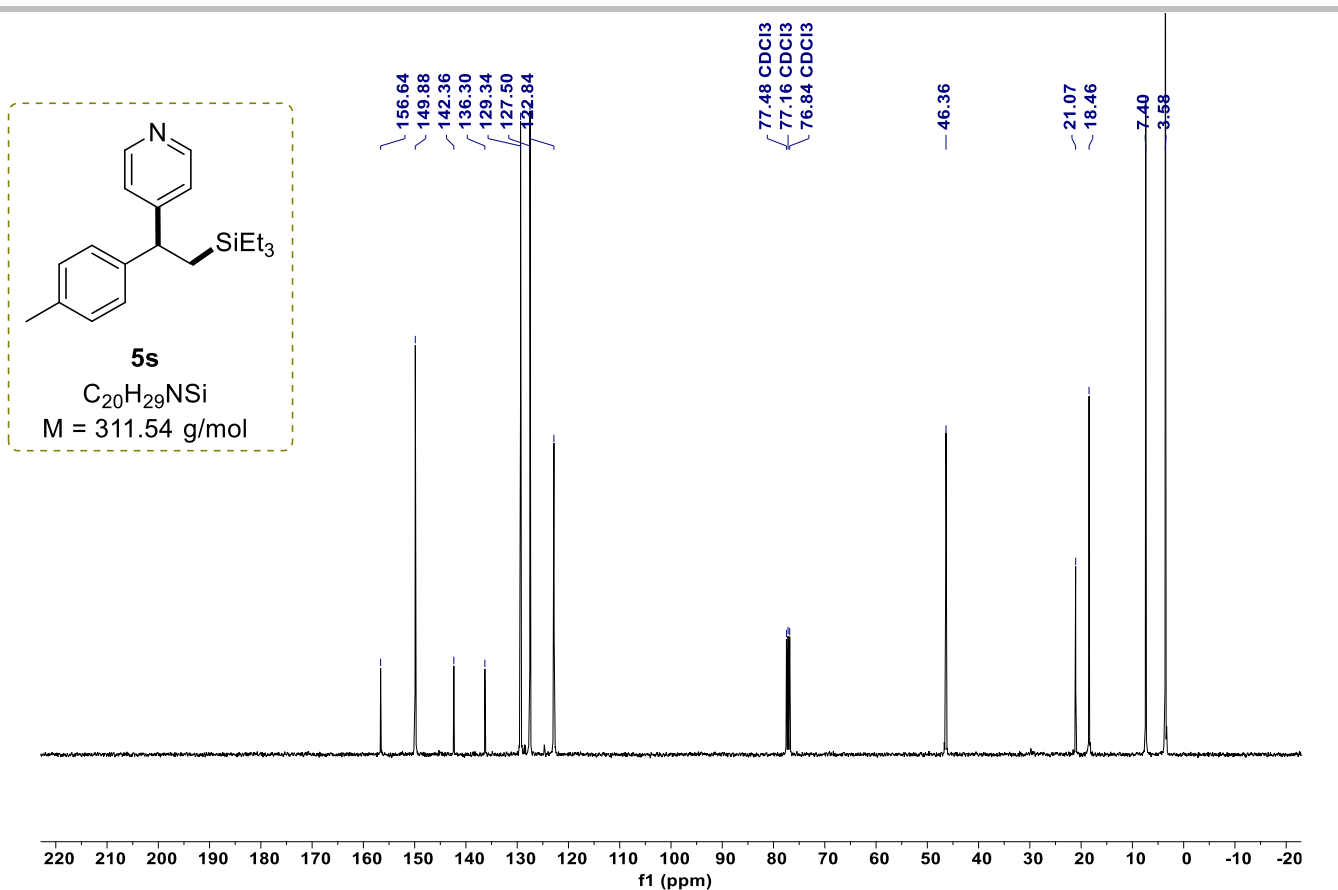

$^{13}C\{^1H\}$  NMR spectrum (100 MHz,  $CDCl_3$ ) of compound **5s**.

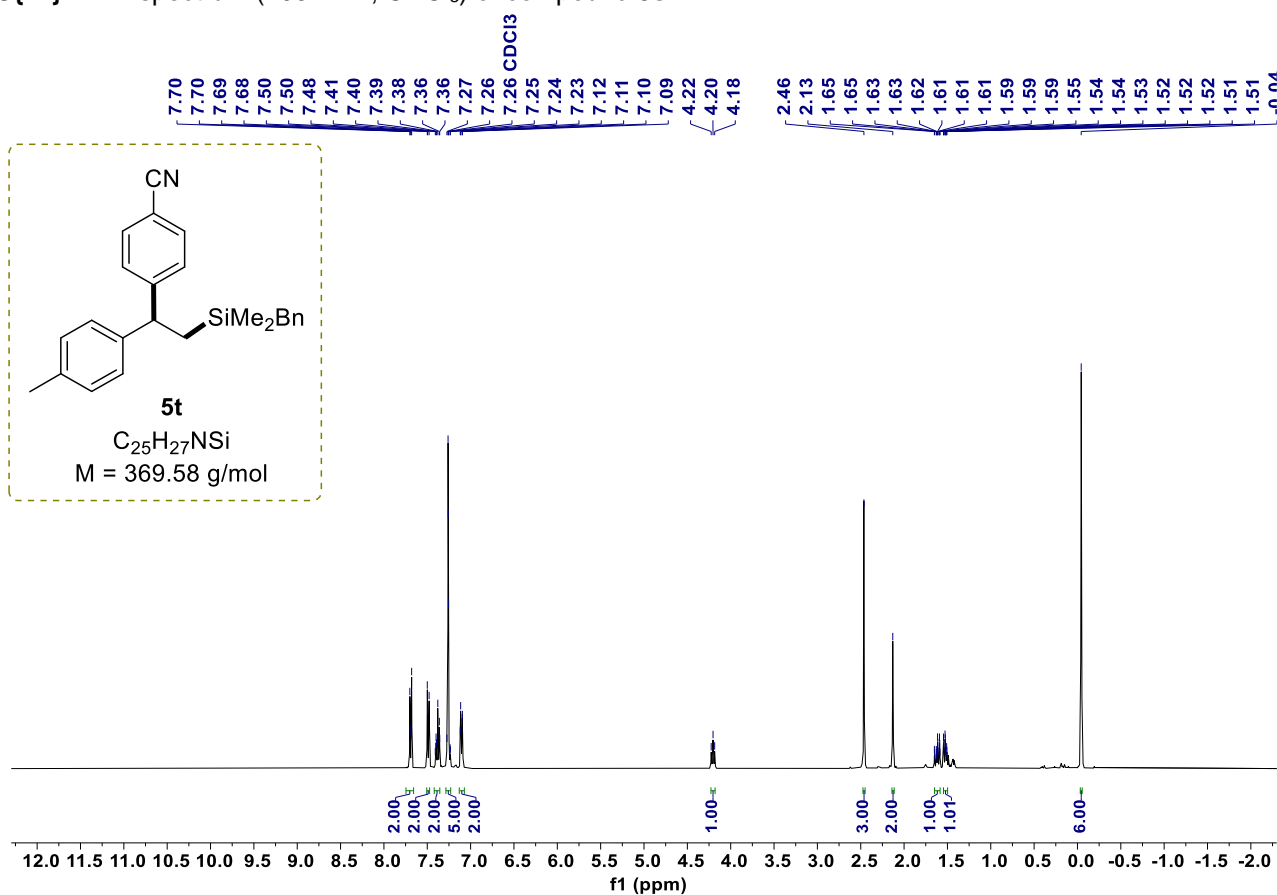

$^1H$  NMR spectrum (400 MHz,  $CDCl_3$ ) of compound **5t**.

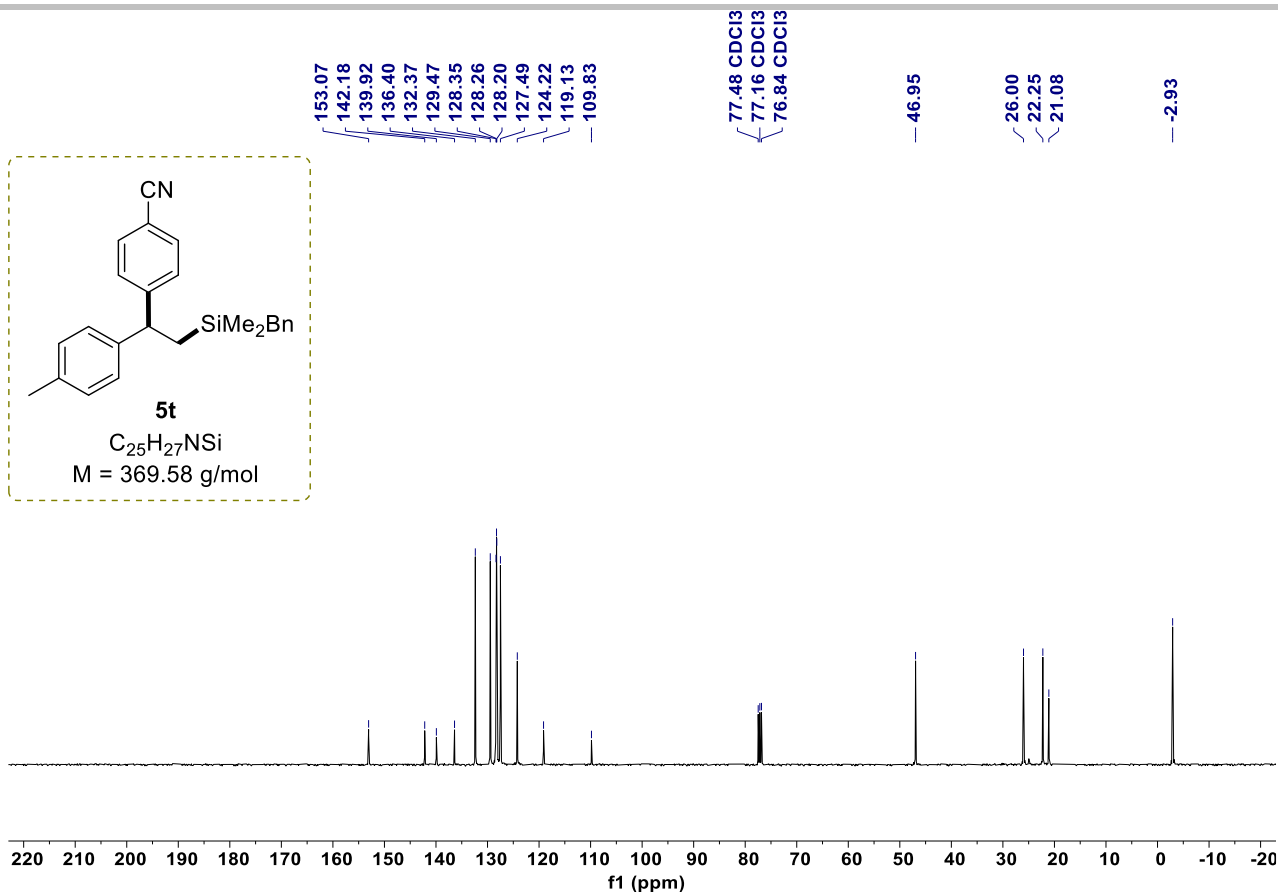

$^{13}C\{^1H\}$  NMR spectrum (100 MHz,  $CDCl_3$ ) of compound **5t**.

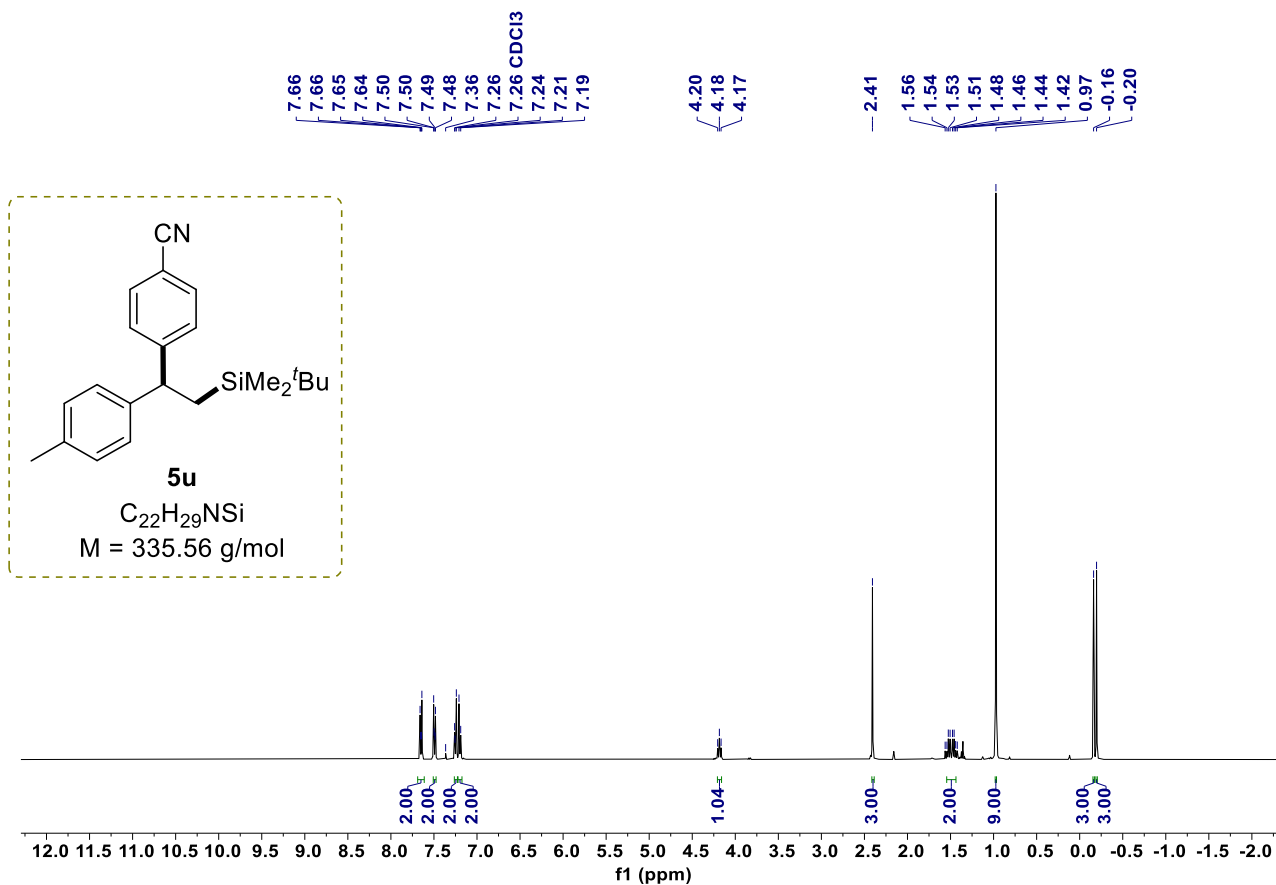

$^1H$  NMR spectrum (400 MHz,  $CDCl_3$ ) of compound **5u**.

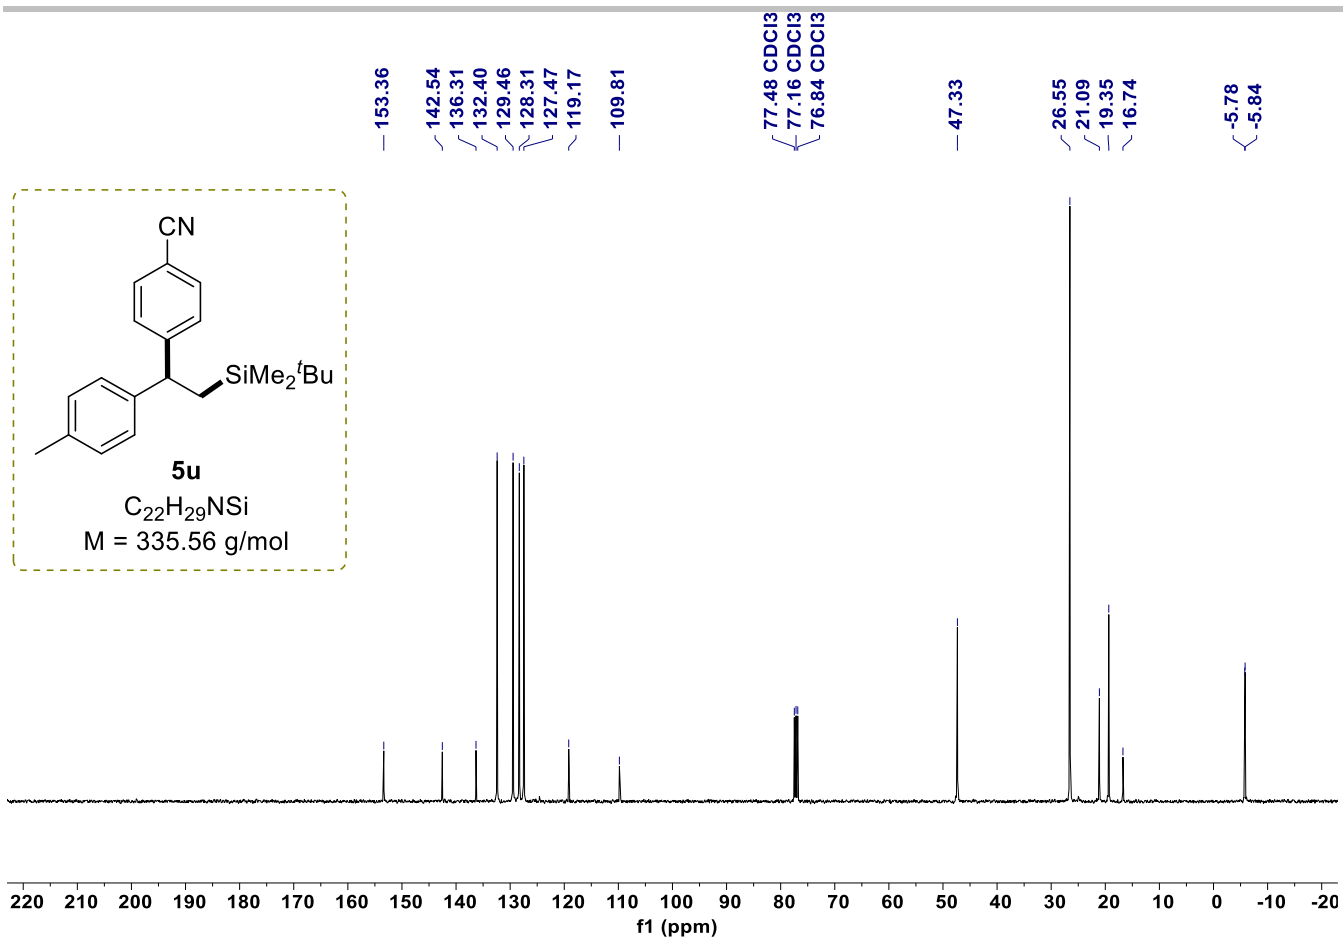

$^{13}C\{^1H\}$  NMR spectrum (100 MHz, CDCl<sub>3</sub>) of compound **5u**.

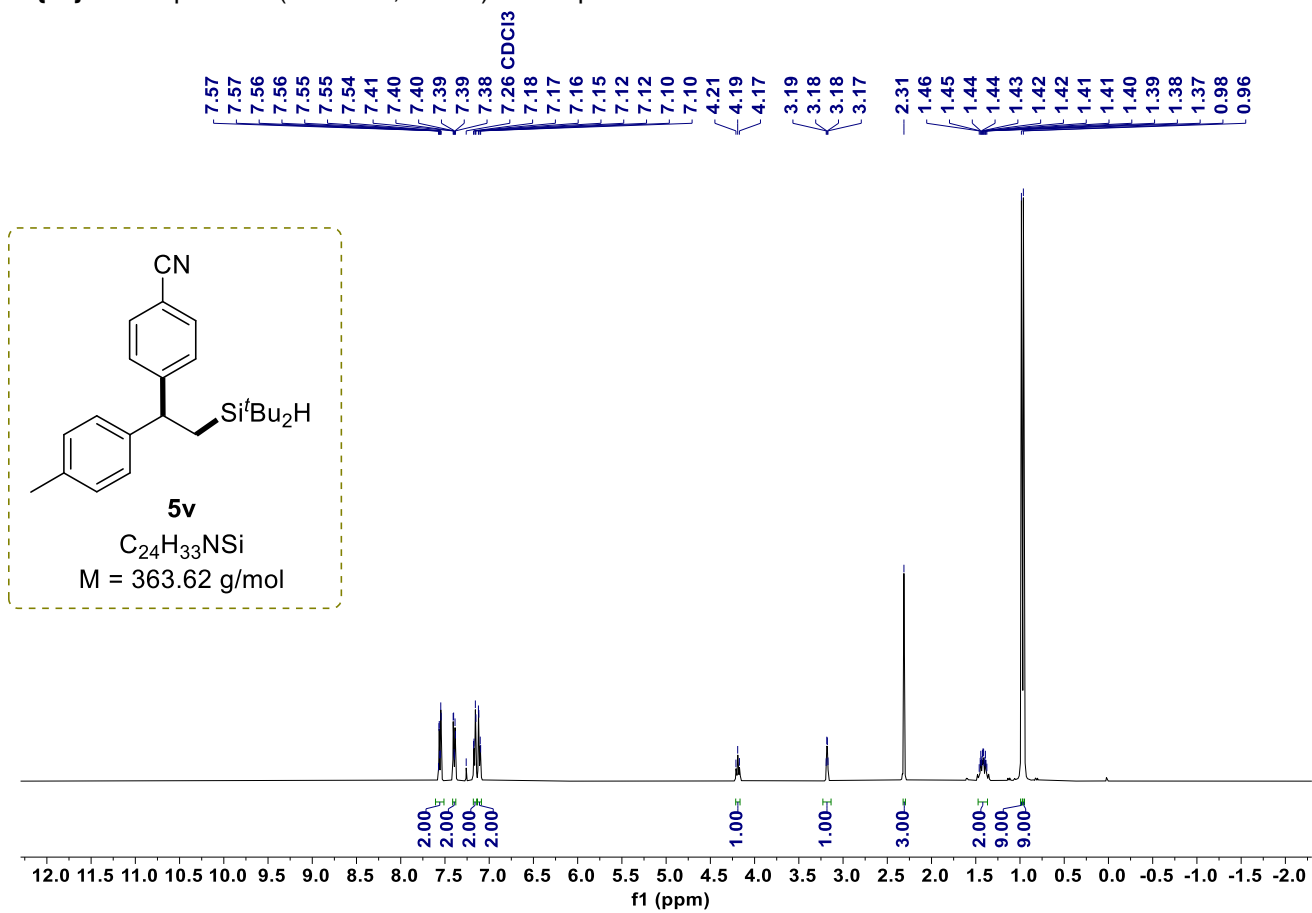

$^1\text{H}$  NMR spectrum (400 MHz,  $\text{CDCl}_3$ ) of compound **5v**.

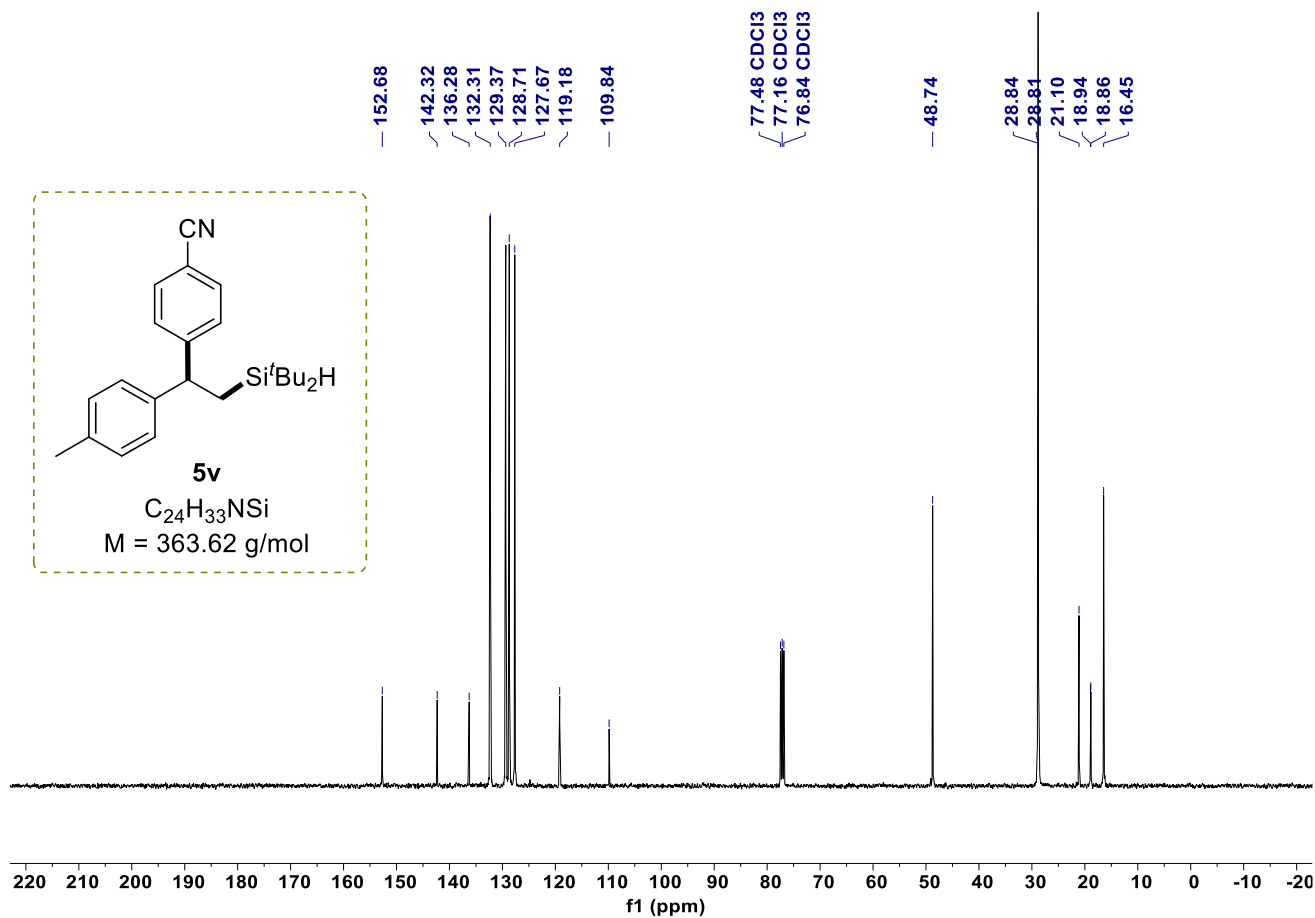

$^{13}\text{C}\{^1\text{H}\}$  NMR spectrum (100 MHz,  $\text{CDCl}_3$ ) of compound **5v**.

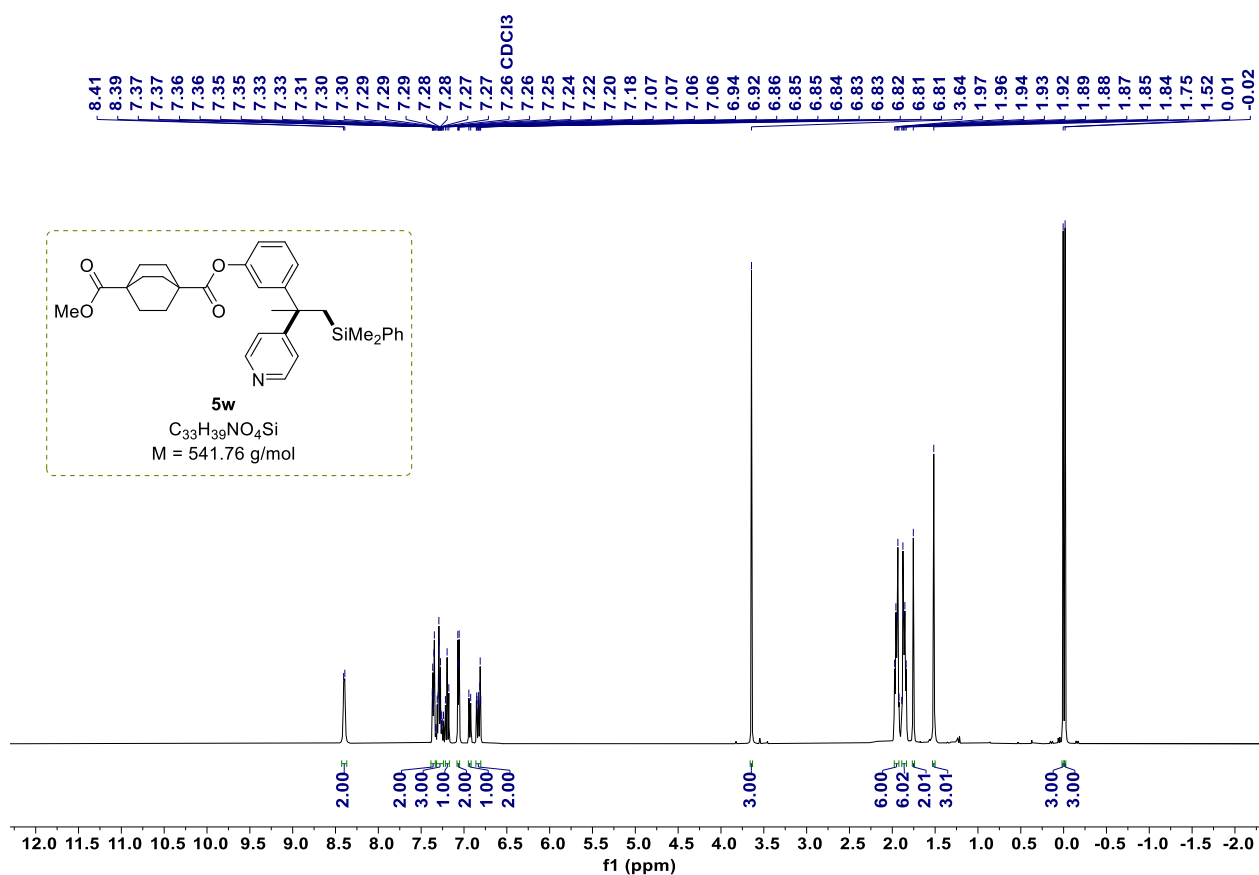

<sup>1</sup>H NMR spectrum (400 MHz, CDCl<sub>3</sub>) of compound **5w**.

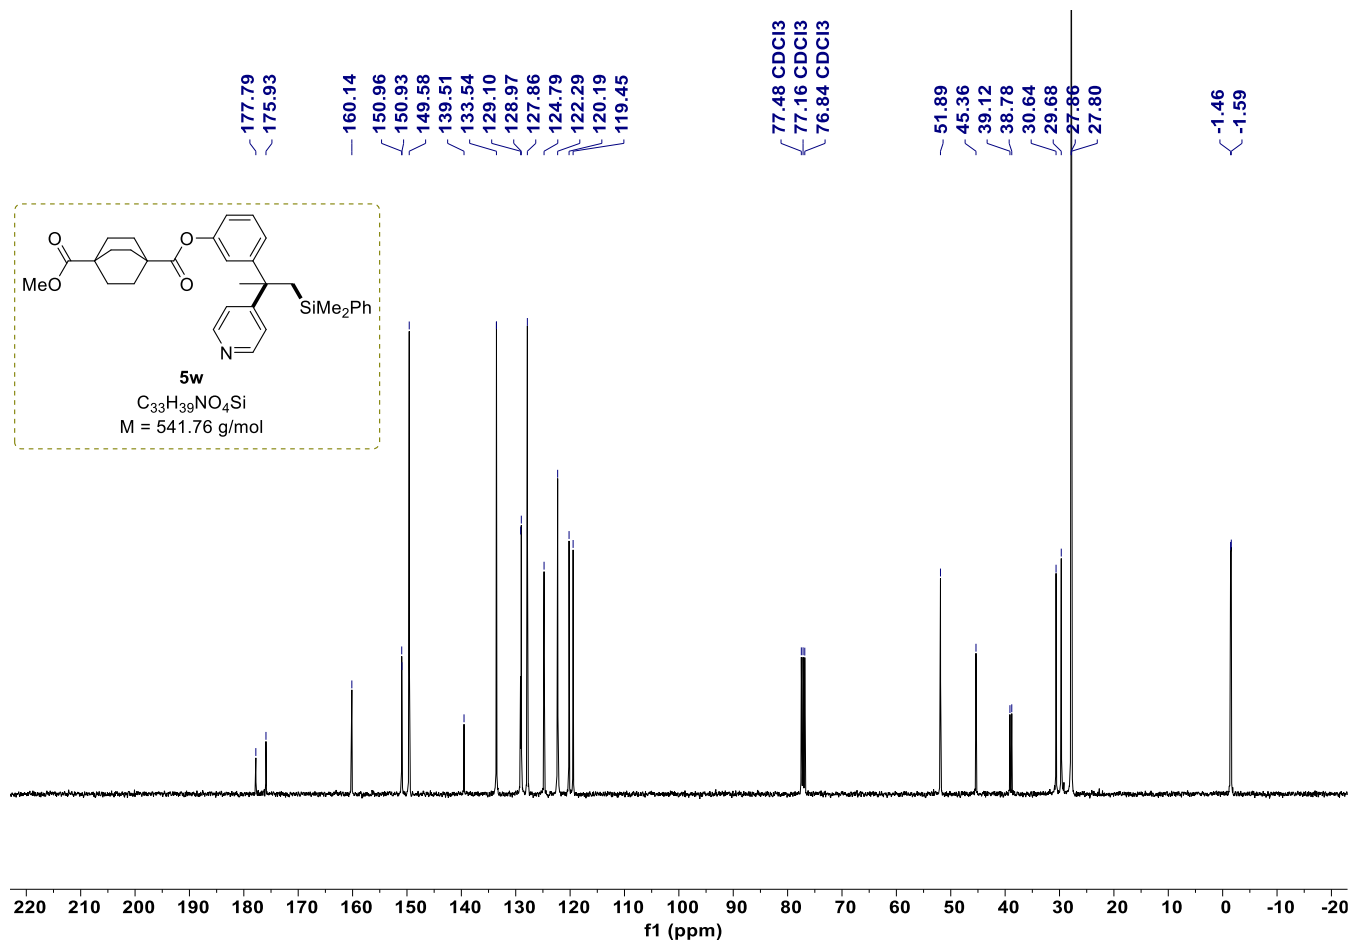

<sup>13</sup>C{<sup>1</sup>H} NMR spectrum (100 MHz, CDCl<sub>3</sub>) of compound **5w**.

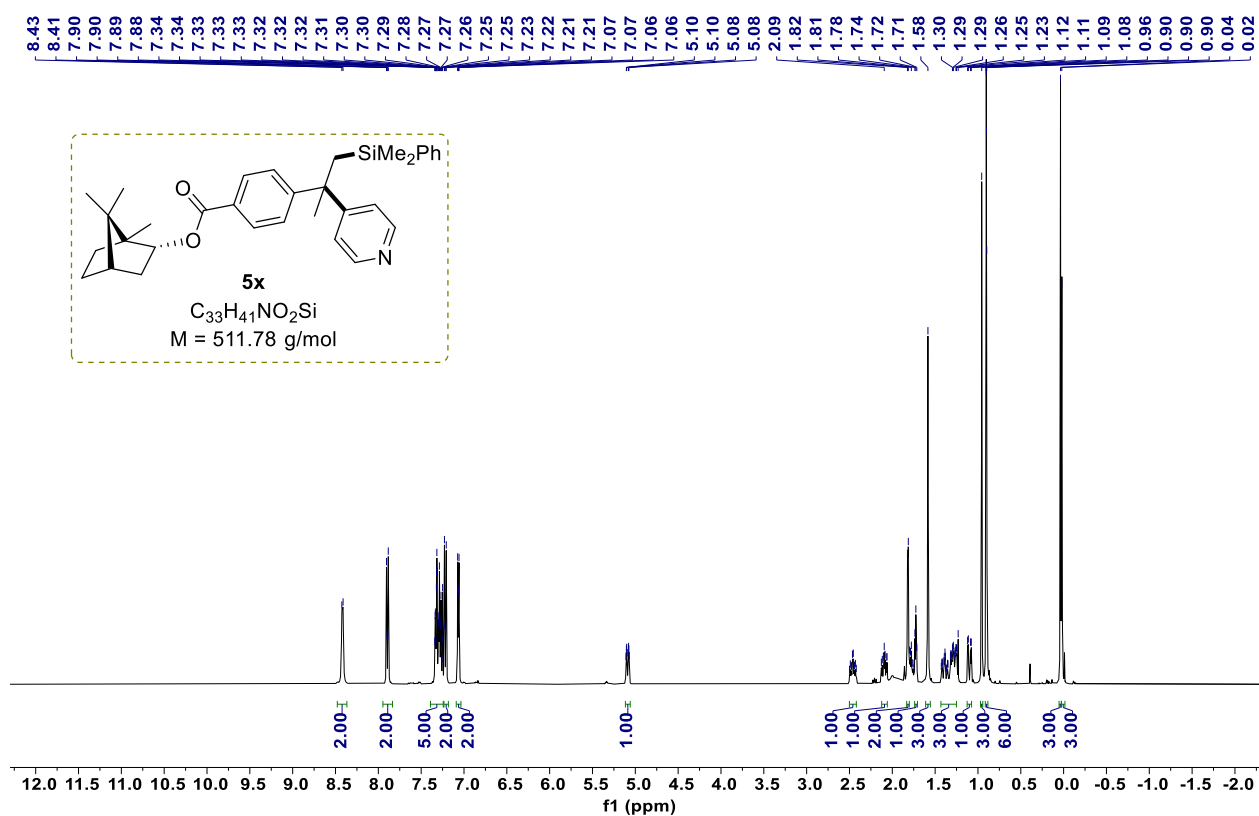



<sup>1</sup>H NMR spectrum (400 MHz, CDCl<sub>3</sub>) of compound **5x**

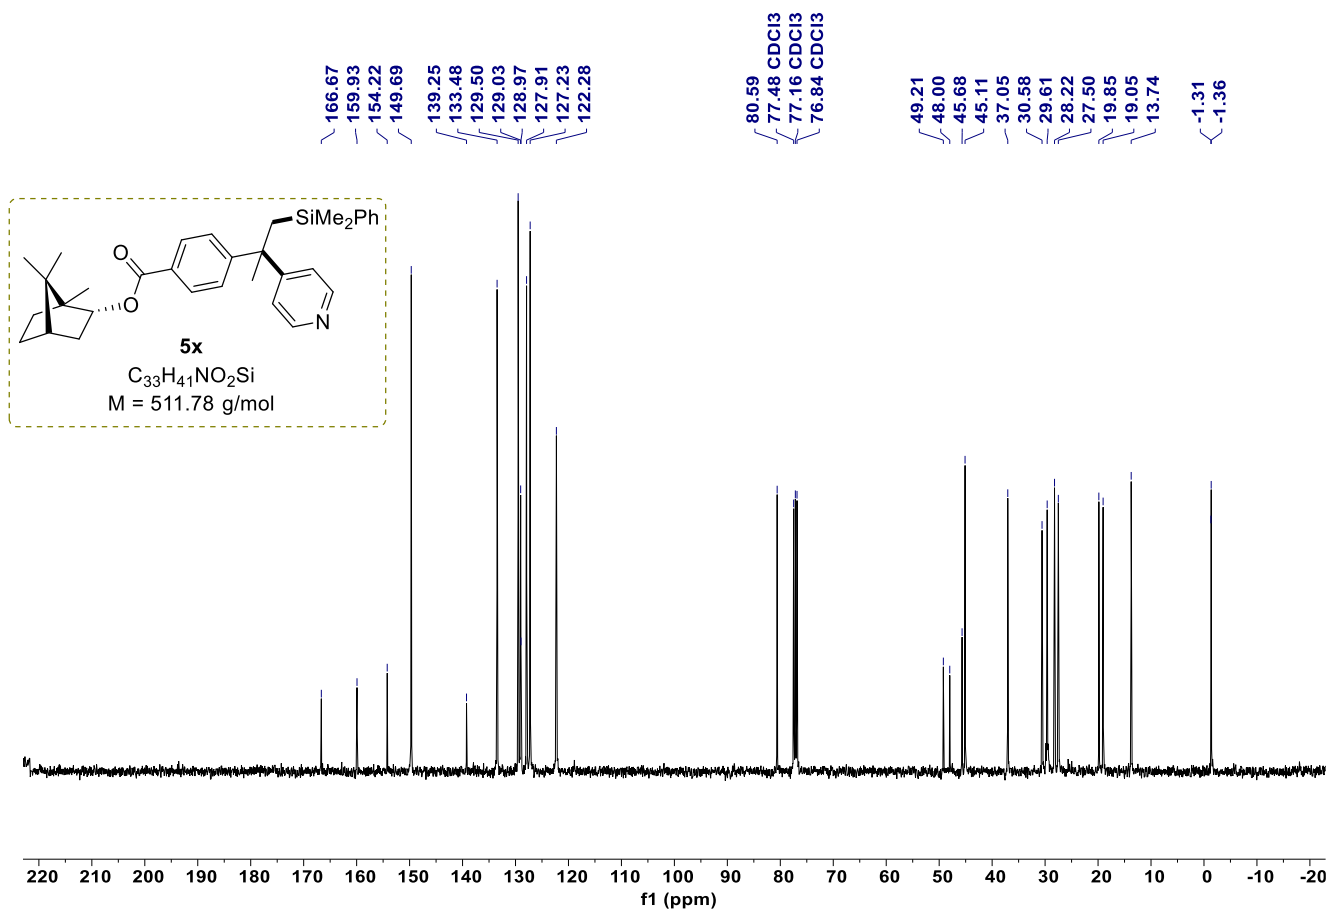

<sup>13</sup>C{<sup>1</sup>H} NMR spectrum (100 MHz, CDCl<sub>3</sub>) of compound **5x**.

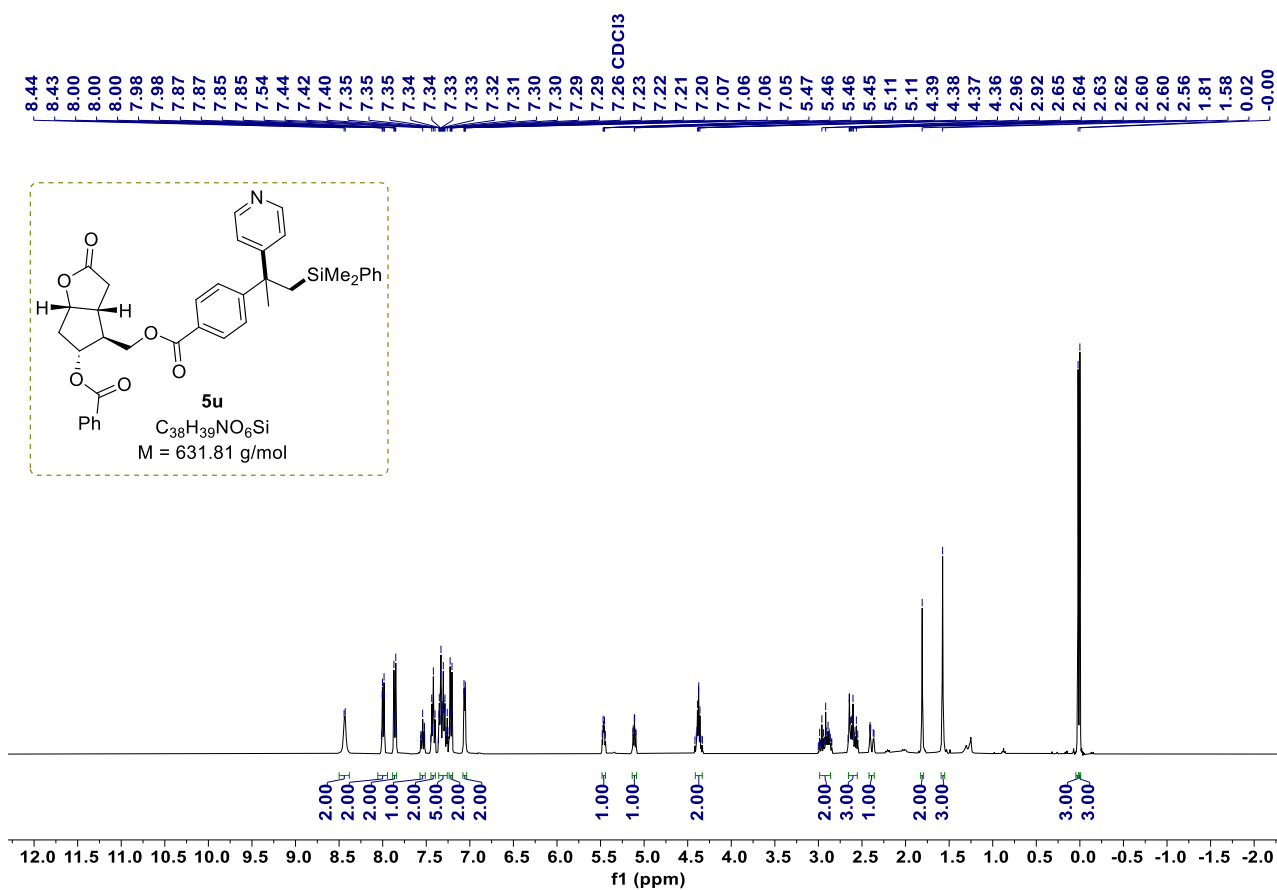

<sup>1</sup>H NMR spectrum (400 MHz, CDCl<sub>3</sub>) of compound **5y**.

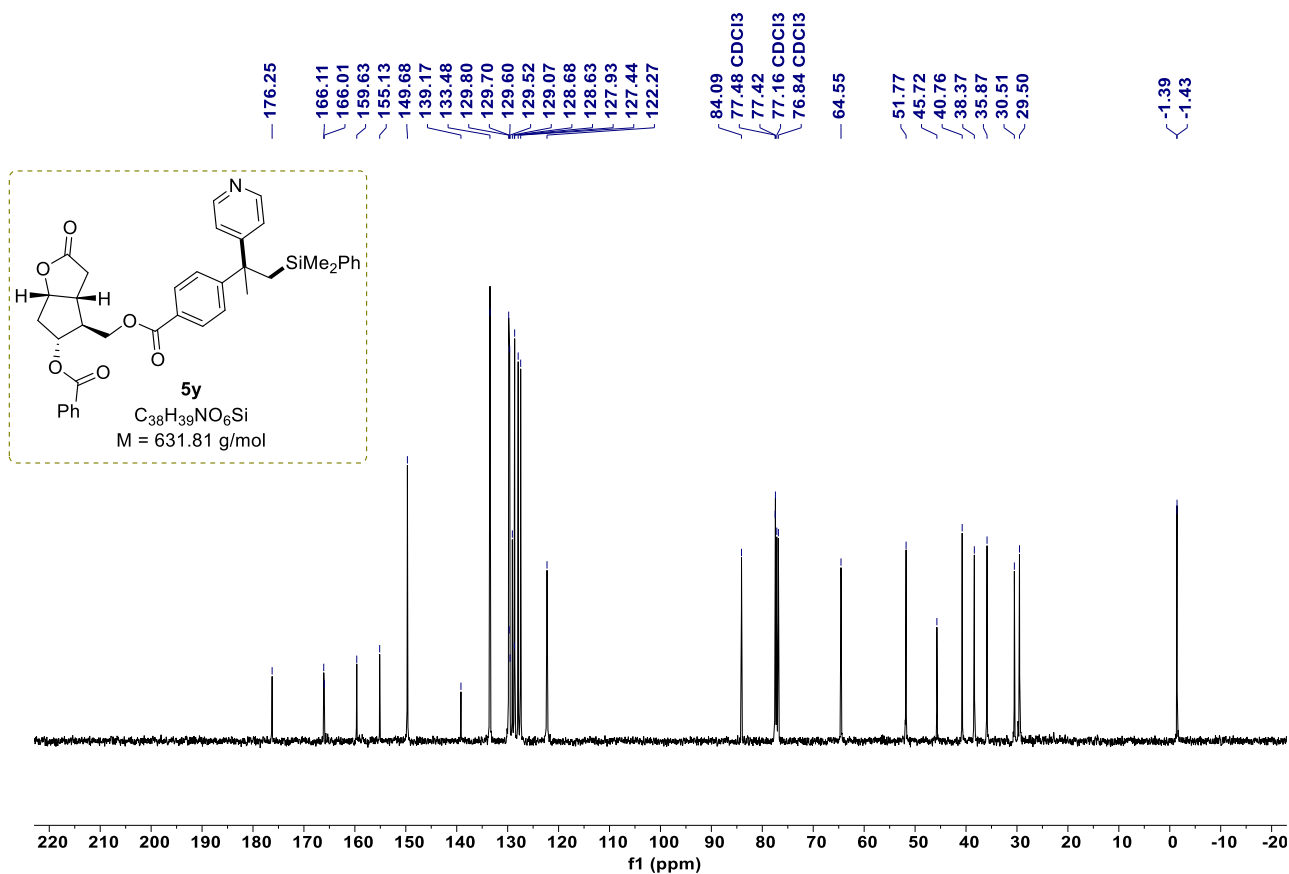

<sup>13</sup>C{<sup>1</sup>H} NMR spectrum (100 MHz, CDCl<sub>3</sub>) of compound **5z**.

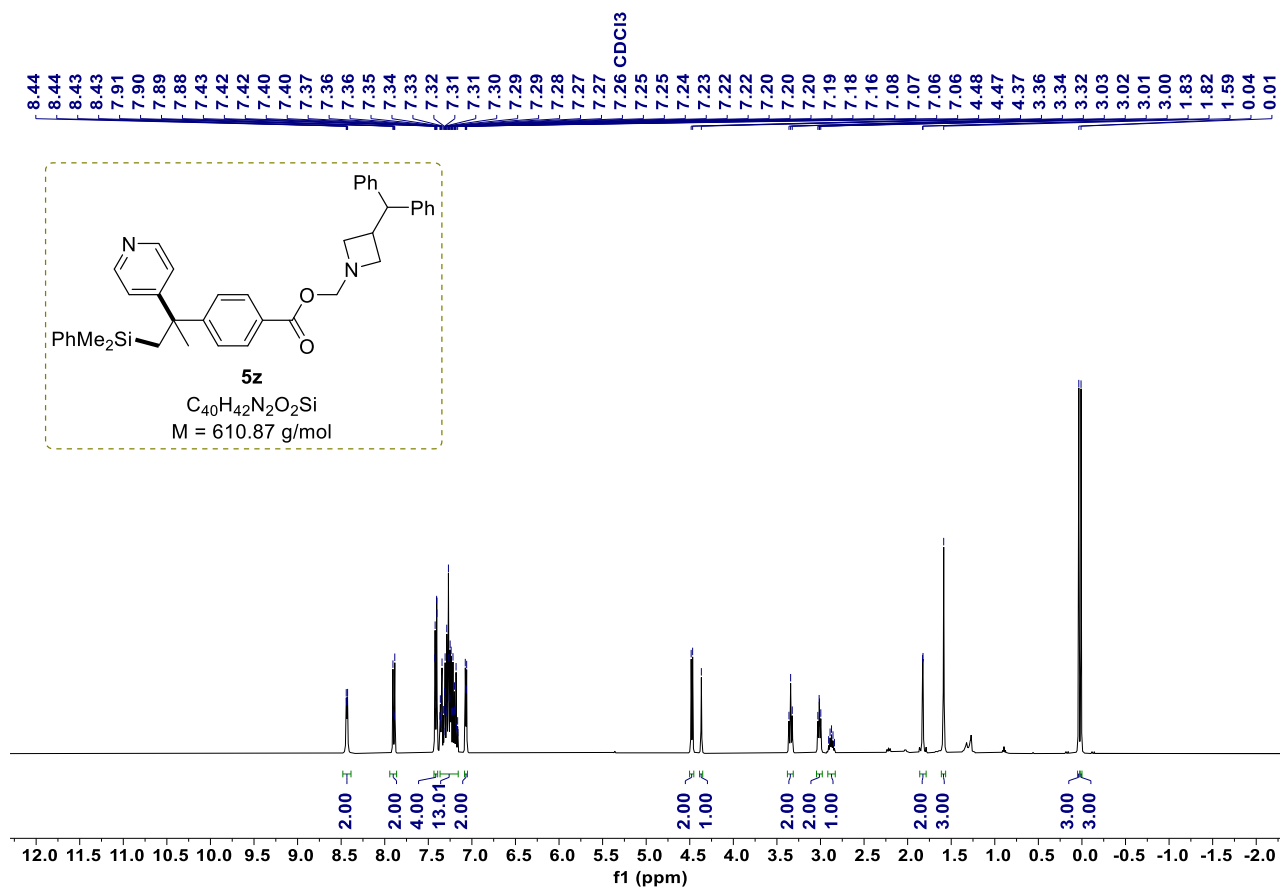



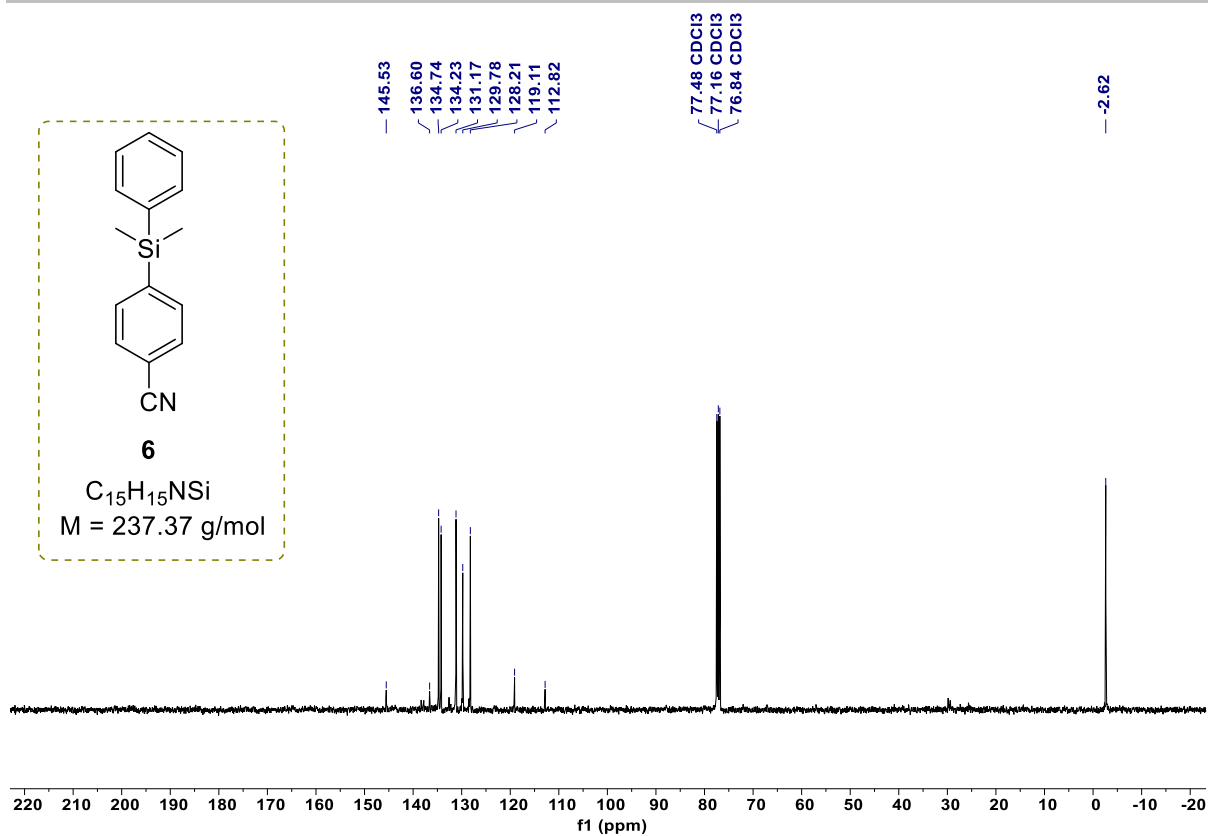

$^{13}C$  NMR spectrum (100 MHz,  $CDCl_3$ ) of compound **6**.

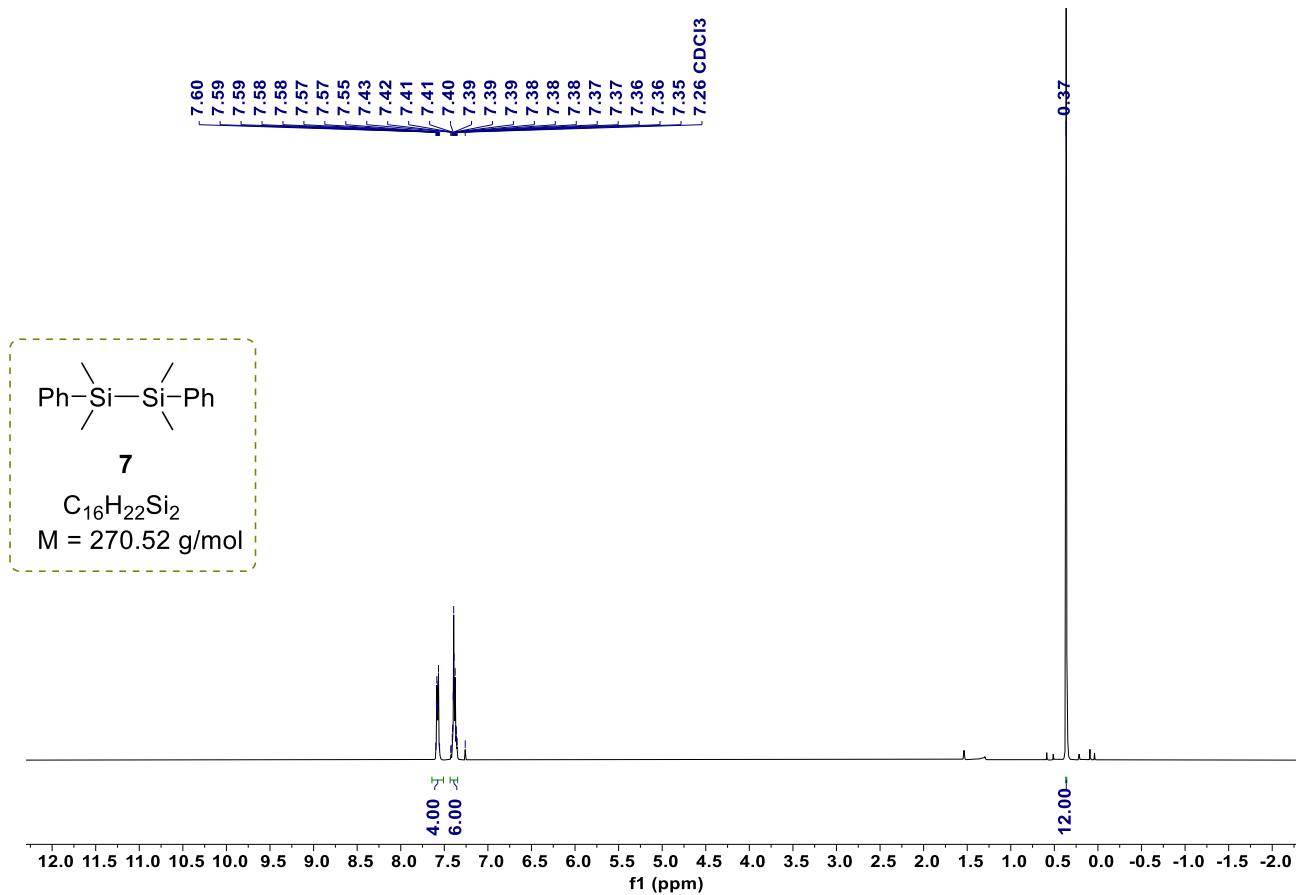

$^1H$  NMR spectrum (400 MHz,  $CDCl_3$ ) of compound **7**.

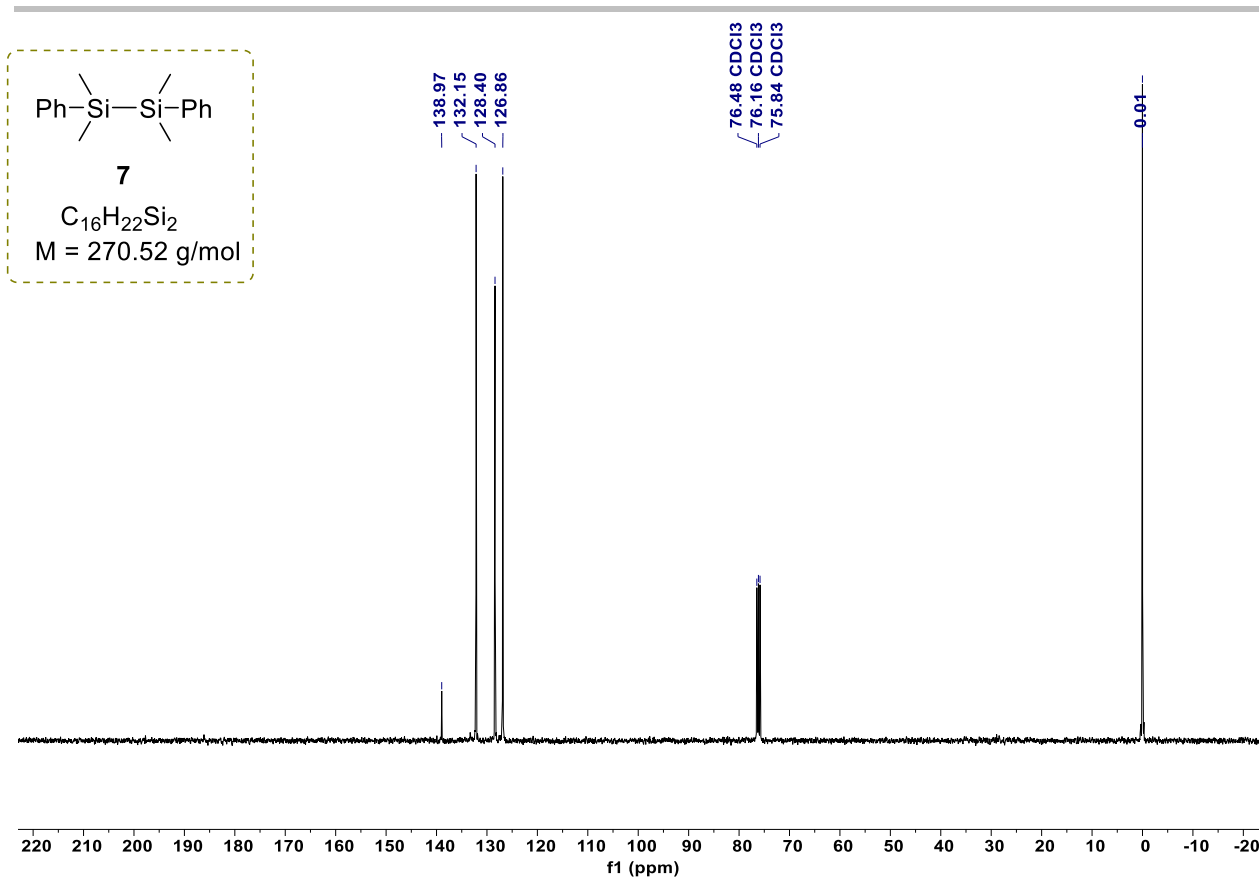

$^{13}C\{^1H\}$  NMR spectrum (100 MHz,  $CDCl_3$ ) of compound **7**.

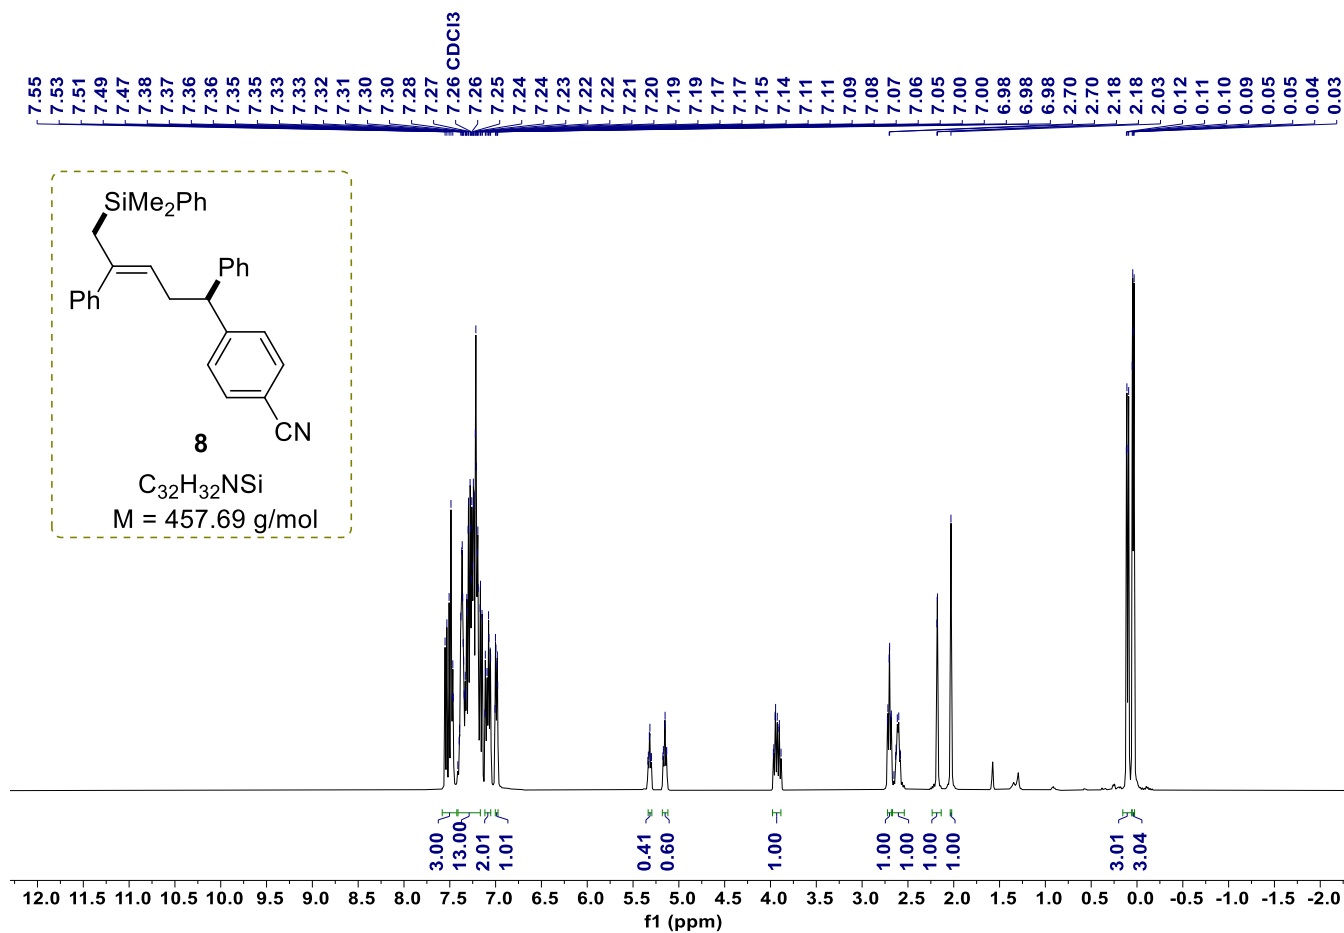

$^1H$  NMR spectrum (400 MHz,  $CDCl_3$ ) of compound **8**.

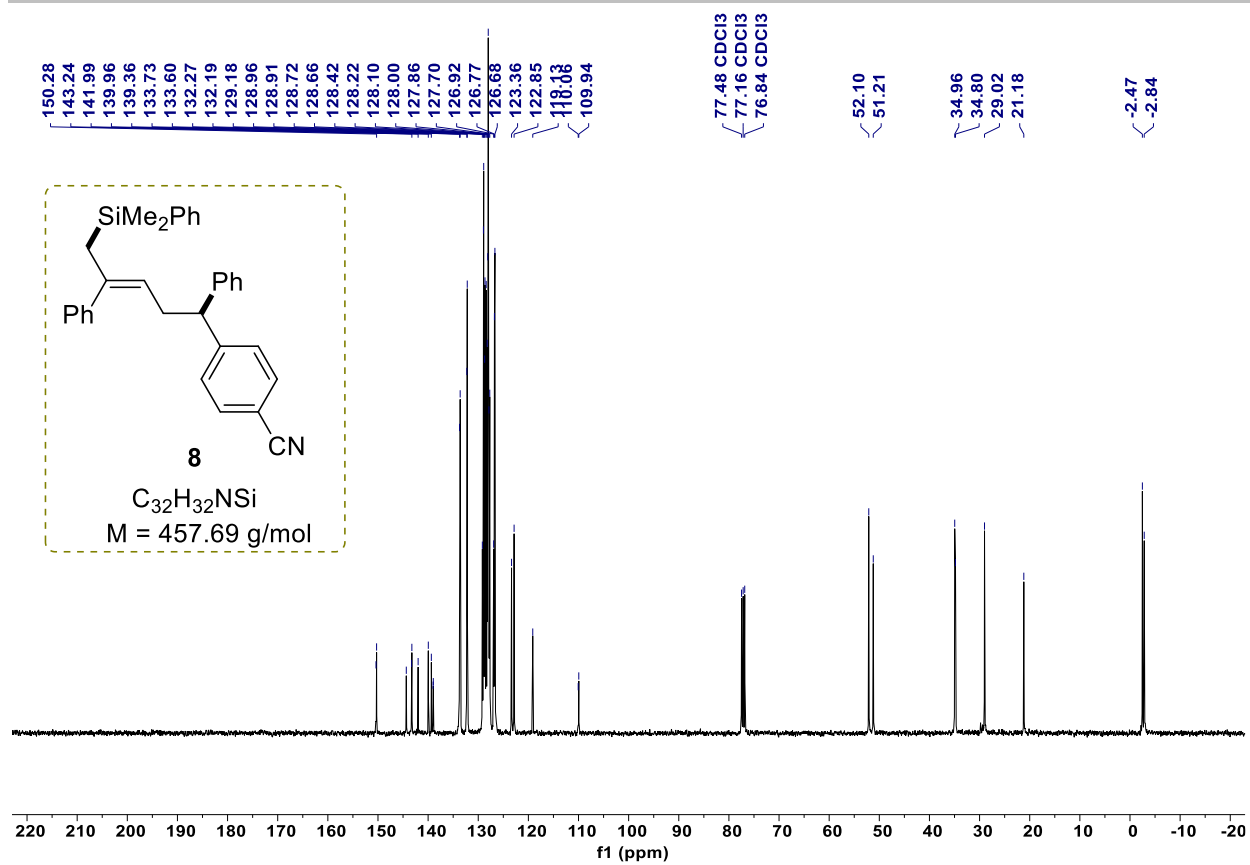

---

## 5. Energies and Cartesian Coordinates of the Optimized Structures

### PhMe<sub>2</sub>Si

M06-2X/6-311G(d,p) Electronic Energy: -600.765986 a.u.

M06-2X/6-311G(d,p) Gibbs free Energy: -600.637361 a.u.

M06-2X/cc-pVTZ Electronic Energy: -600.9105695 a.u.

---

| Center<br>Number | Atomic<br>Number | Atomic<br>Type | Coordinates (Angstroms) |           |           |
|------------------|------------------|----------------|-------------------------|-----------|-----------|
|                  |                  |                | X                       | Y         | Z         |
| 1                | 14               | 0              | -2.200526               | -3.072465 | 0.273670  |
| 2                | 6                | 0              | -2.651183               | -3.735241 | -1.419573 |
| 3                | 6                | 0              | -3.854938               | -3.372948 | -2.045281 |
| 4                | 6                | 0              | -1.781914               | -4.587047 | -2.119881 |
| 5                | 6                | 0              | -4.180931               | -3.846046 | -3.312252 |
| 6                | 1                | 0              | -4.552544               | -2.714549 | -1.532660 |
| 7                | 6                | 0              | -2.102881               | -5.062997 | -3.387025 |
| 8                | 1                | 0              | -0.840581               | -4.888687 | -1.666232 |
| 9                | 6                | 0              | -3.304500               | -4.692979 | -3.986776 |
| 10               | 1                | 0              | -5.119800               | -3.556133 | -3.773972 |
| 11               | 1                | 0              | -1.417090               | -5.724681 | -3.907178 |
| 12               | 1                | 0              | -3.556964               | -5.063198 | -4.975363 |
| 13               | 6                | 0              | -1.076166               | -4.286871 | 1.183339  |
| 14               | 1                | 0              | -0.856427               | -3.920851 | 2.189723  |
| 15               | 1                | 0              | -1.557669               | -5.266564 | 1.274020  |
| 16               | 1                | 0              | -0.122910               | -4.424451 | 0.666834  |
| 17               | 6                | 0              | -3.756248               | -2.712233 | 1.281798  |
| 18               | 1                | 0              | -4.374587               | -3.611596 | 1.374611  |
| 19               | 1                | 0              | -3.488216               | -2.377738 | 2.287453  |
| 20               | 1                | 0              | -4.365032               | -1.928139 | 0.824650  |

---

### Styrene

M06-2X/6-311G(d,p) Electronic Energy: -309.5099356 a.u.

M06-2X/6-311G(d,p) Gibbs free Energy: -309.406730 a.u.

M06-2X/cc-pVTZ Electronic Energy: -309.6244497 a.u.

---

| Center<br>Number | Atomic<br>Number | Atomic<br>Type | Coordinates (Angstroms) |           |           |
|------------------|------------------|----------------|-------------------------|-----------|-----------|
|                  |                  |                | X                       | Y         | Z         |
| 1                | 6                | 0              | -2.774676               | -2.288413 | 0.065202  |
| 2                | 6                | 0              | -1.431566               | -2.188260 | -0.295865 |
| 3                | 6                | 0              | -0.824765               | -0.943742 | -0.401608 |
| 4                | 6                | 0              | -1.550075               | 0.229382  | -0.154799 |

---

|    |   |   |           |           |           |
|----|---|---|-----------|-----------|-----------|
| 5  | 6 | 0 | -2.893564 | 0.113327  | 0.218346  |
| 6  | 6 | 0 | -3.503848 | -1.132306 | 0.324636  |
| 7  | 1 | 0 | -3.245553 | -3.262343 | 0.149971  |
| 8  | 1 | 0 | -0.853229 | -3.086371 | -0.488246 |
| 9  | 1 | 0 | 0.226987  | -0.881408 | -0.663071 |
| 10 | 1 | 0 | -3.465234 | 1.015140  | 0.421077  |
| 11 | 1 | 0 | -4.548348 | -1.199232 | 0.611739  |
| 12 | 6 | 0 | -0.952097 | 1.572155  | -0.269846 |
| 13 | 6 | 0 | 0.212476  | 1.874579  | -0.843349 |
| 14 | 1 | 0 | -1.550914 | 2.378654  | 0.150886  |
| 15 | 1 | 0 | 0.567933  | 2.898052  | -0.876920 |
| 16 | 1 | 0 | 0.844919  | 1.123326  | -1.306103 |

#### 4-canopyridine radical anion

M06-2X/6-311G(d,p) Electronic Energy: -340.3947714 a.u.

M06-2X/6-311G(d,p) Gibbs free Energy: -340.340466 a.u.

M06-2X/cc-pVTZ Electronic Energy: -340.609116 a.u.

| Center<br>Number | Atomic<br>Number | Atomic<br>Type | Coordinates (Angstroms) |           |           |
|------------------|------------------|----------------|-------------------------|-----------|-----------|
|                  |                  |                | X                       | Y         | Z         |
| 1                | 6                | 0              | -1.468928               | -2.122529 | -0.274858 |
| 2                | 6                | 0              | -0.820590               | -0.922052 | -0.402538 |
| 3                | 6                | 0              | -1.530680               | 0.306688  | -0.155556 |
| 4                | 6                | 0              | -2.910845               | 0.128535  | 0.216547  |
| 5                | 6                | 0              | -3.435676               | -1.133942 | 0.307724  |
| 6                | 1                | 0              | -0.909246               | -3.040650 | -0.467362 |
| 7                | 1                | 0              | 0.226951                | -0.894494 | -0.689132 |
| 8                | 1                | 0              | -3.532317               | 0.995100  | 0.424141  |
| 9                | 1                | 0              | -4.484781               | -1.243492 | 0.591693  |
| 10               | 6                | 0              | -0.931409               | 1.565243  | -0.267842 |
| 11               | 7                | 0              | -0.427147               | 2.624011  | -0.362198 |
| 12               | 7                | 0              | -2.774166               | -2.304060 | 0.076348  |

#### TS1

M06-2X/6-311G(d,p) Electronic Energy: -910.282174 a.u.

M06-2X/6-311G(d,p) Gibbs free Energy: -910.031327 a.u.

M06-2X/cc-pVTZ Electronic Energy: -910.5381606 a.u.

| Center<br>Number | Atomic<br>Number | Atomic<br>Type | Coordinates (Angstroms) |          |          |
|------------------|------------------|----------------|-------------------------|----------|----------|
|                  |                  |                | X                       | Y        | Z        |
| 1                | 6                | 0              | 6.217785                | 0.448948 | 4.074895 |
| 2                | 6                | 0              | 6.750043                | 0.279440 | 2.796840 |
| 3                | 6                | 0              | 6.084917                | 0.781268 | 1.686166 |
| 4                | 6                | 0              | 4.863517                | 1.460382 | 1.825985 |



|    |    |   |           |           |           |
|----|----|---|-----------|-----------|-----------|
| 5  | 6  | 0 | 4.346786  | 1.630205  | 3.118768  |
| 6  | 6  | 0 | 5.013577  | 1.129438  | 4.231241  |
| 7  | 1  | 0 | 6.741609  | 0.057360  | 4.940548  |
| 8  | 1  | 0 | 7.693292  | -0.241751 | 2.667273  |
| 9  | 1  | 0 | 6.520627  | 0.653628  | 0.699743  |
| 10 | 1  | 0 | 3.405245  | 2.159147  | 3.243515  |
| 11 | 1  | 0 | 4.591986  | 1.270512  | 5.221322  |
| 12 | 6  | 0 | 4.110971  | 1.984414  | 0.683083  |
| 13 | 6  | 0 | 4.321507  | 1.691510  | -0.617115 |
| 14 | 1  | 0 | 3.261961  | 2.616676  | 0.937702  |
| 15 | 1  | 0 | 3.741508  | 2.174234  | -1.395077 |
| 16 | 1  | 0 | 5.172822  | 1.104197  | -0.948857 |
| 17 | 14 | 0 | 2.833538  | -0.694429 | -0.793610 |
| 18 | 6  | 0 | 1.909639  | -1.517462 | -2.202406 |
| 19 | 6  | 0 | 0.561903  | -1.217670 | -2.461216 |
| 20 | 6  | 0 | 2.553397  | -2.419900 | -3.065111 |
| 21 | 6  | 0 | -0.115545 | -1.797894 | -3.528740 |
| 22 | 1  | 0 | 0.030832  | -0.524024 | -1.812804 |
| 23 | 6  | 0 | 1.880611  | -3.003504 | -4.133661 |
| 24 | 1  | 0 | 3.596876  | -2.676050 | -2.894724 |
| 25 | 6  | 0 | 0.542914  | -2.693194 | -4.368903 |
| 26 | 1  | 0 | -1.159035 | -1.554949 | -3.705079 |
| 27 | 1  | 0 | 2.397978  | -3.703265 | -4.783004 |
| 28 | 1  | 0 | 0.016091  | -3.147372 | -5.202148 |
| 29 | 6  | 0 | 4.217532  | -1.812214 | -0.163968 |
| 30 | 1  | 0 | 4.672291  | -1.371911 | 0.728628  |
| 31 | 1  | 0 | 3.830665  | -2.802000 | 0.100666  |
| 32 | 1  | 0 | 5.006617  | -1.946839 | -0.909380 |
| 33 | 6  | 0 | 1.644325  | -0.244242 | 0.599946  |
| 34 | 1  | 0 | 1.014695  | -1.098232 | 0.869185  |
| 35 | 1  | 0 | 2.215503  | 0.054509  | 1.484057  |
| 36 | 1  | 0 | 0.990055  | 0.588739  | 0.326823  |

**IM2**

M06-2X/6-311G(d,p) Electronic Energy: -910.331454 a.u.

M06-2X/6-311G(d,p) Gibbs free Energy: -910.077428 a.u.

M06-2X/cc-pVTZ Electronic Energy: -910.5866586 a.u.

| Center<br>Number | Atomic<br>Number | Atomic<br>Type | Coordinates (Angstroms) |          |          |
|------------------|------------------|----------------|-------------------------|----------|----------|
|                  |                  |                | X                       | Y        | Z        |
| 1                | 6                | 0              | 7.000394                | 1.003151 | 3.346469 |
| 2                | 6                | 0              | 6.946405                | 0.508336 | 2.042238 |
| 3                | 6                | 0              | 5.791697                | 0.629440 | 1.286262 |
| 4                | 6                | 0              | 4.634577                | 1.257032 | 1.815237 |
| 5                | 6                | 0              | 4.714777                | 1.750551 | 3.143615 |

---

|    |    |   |           |           |           |
|----|----|---|-----------|-----------|-----------|
| 6  | 6  | 0 | 5.872524  | 1.626006  | 3.889191  |
| 7  | 1  | 0 | 7.907765  | 0.905200  | 3.932574  |
| 8  | 1  | 0 | 7.817269  | 0.022754  | 1.612563  |
| 9  | 1  | 0 | 5.772019  | 0.234185  | 0.275607  |
| 10 | 1  | 0 | 3.841648  | 2.235973  | 3.571596  |
| 11 | 1  | 0 | 5.903275  | 2.014514  | 4.902456  |
| 12 | 6  | 0 | 3.432218  | 1.406210  | 1.075876  |
| 13 | 6  | 0 | 3.192950  | 0.898345  | -0.296478 |
| 14 | 1  | 0 | 2.597326  | 1.880415  | 1.585443  |
| 15 | 1  | 0 | 2.453104  | 1.519574  | -0.815241 |
| 16 | 1  | 0 | 4.100036  | 0.901063  | -0.911247 |
| 17 | 14 | 0 | 2.494011  | -0.880265 | -0.255008 |
| 18 | 6  | 0 | 2.058577  | -1.386793 | -2.015719 |
| 19 | 6  | 0 | 1.083267  | -0.679267 | -2.735235 |
| 20 | 6  | 0 | 2.690003  | -2.460777 | -2.656679 |
| 21 | 6  | 0 | 0.751464  | -1.027203 | -4.040630 |
| 22 | 1  | 0 | 0.568984  | 0.159658  | -2.268946 |
| 23 | 6  | 0 | 2.363432  | -2.816404 | -3.963806 |
| 24 | 1  | 0 | 3.448676  | -3.033658 | -2.128645 |
| 25 | 6  | 0 | 1.393561  | -2.099052 | -4.657484 |
| 26 | 1  | 0 | -0.006656 | -0.465504 | -4.577606 |
| 27 | 1  | 0 | 2.865107  | -3.653223 | -4.439899 |
| 28 | 1  | 0 | 1.137227  | -2.373685 | -5.675923 |
| 29 | 6  | 0 | 3.764257  | -2.063081 | 0.461874  |
| 30 | 1  | 0 | 4.060187  | -1.739909 | 1.464375  |
| 31 | 1  | 0 | 3.353703  | -3.074896 | 0.537105  |
| 32 | 1  | 0 | 4.670213  | -2.110324 | -0.150147 |
| 33 | 6  | 0 | 0.942213  | -0.869130 | 0.807296  |
| 34 | 1  | 0 | 0.486142  | -1.862358 | 0.841418  |
| 35 | 1  | 0 | 1.181874  | -0.567646 | 1.831530  |
| 36 | 1  | 0 | 0.194810  | -0.171530 | 0.416557  |

---

## TS2

M06-2X/6-311G(d,p) Electronic Energy: -1250.7694513 a.u.

M06-2X/6-311G(d,p) Gibbs free Energy: -1250.436685 a.u.

M06-2X/cc-pVTZ Electronic Energy: -1251.2129727 a.u.

---

| Center<br>Number | Atomic<br>Number | Atomic<br>Type | Coordinates (Angstroms) |          |          |
|------------------|------------------|----------------|-------------------------|----------|----------|
|                  |                  |                | X                       | Y        | Z        |
| 1                | 6                | 0              | 7.284011                | 0.443877 | 3.242522 |
| 2                | 6                | 0              | 7.206633                | 0.175246 | 1.870813 |
| 3                | 6                | 0              | 6.041505                | 0.389550 | 1.155555 |
| 4                | 6                | 0              | 4.862853                | 0.900203 | 1.781452 |
| 5                | 6                | 0              | 4.969576                | 1.163233 | 3.181354 |
| 6                | 6                | 0              | 6.145406                | 0.941008 | 3.880736 |

---

|    |    |   |           |           |           |
|----|----|---|-----------|-----------|-----------|
| 7  | 1  | 0 | 8.200711  | 0.263797  | 3.795151  |
| 8  | 1  | 0 | 8.080481  | -0.209617 | 1.349006  |
| 9  | 1  | 0 | 6.025571  | 0.182599  | 0.089298  |
| 10 | 1  | 0 | 4.091357  | 1.538584  | 3.700672  |
| 11 | 1  | 0 | 6.173920  | 1.153577  | 4.947854  |
| 12 | 6  | 0 | 3.693898  | 1.254809  | 1.073212  |
| 13 | 6  | 0 | 3.370032  | 0.783819  | -0.315684 |
| 14 | 1  | 0 | 2.842894  | 1.564545  | 1.677199  |
| 15 | 1  | 0 | 2.599517  | 1.435270  | -0.760174 |
| 16 | 1  | 0 | 4.239753  | 0.853763  | -0.984253 |
| 17 | 14 | 0 | 2.704918  | -0.980450 | -0.281636 |
| 18 | 6  | 0 | 1.992621  | -1.475209 | -1.975138 |
| 19 | 6  | 0 | 0.946015  | -0.730734 | -2.542332 |
| 20 | 6  | 0 | 2.480817  | -2.560018 | -2.716072 |
| 21 | 6  | 0 | 0.409099  | -1.052333 | -3.785226 |
| 22 | 1  | 0 | 0.542354  | 0.123123  | -2.000412 |
| 23 | 6  | 0 | 1.950752  | -2.891876 | -3.961975 |
| 24 | 1  | 0 | 3.293498  | -3.159754 | -2.312093 |
| 25 | 6  | 0 | 0.911800  | -2.137993 | -4.499858 |
| 26 | 1  | 0 | -0.399729 | -0.456753 | -4.199336 |
| 27 | 1  | 0 | 2.349621  | -3.738647 | -4.513897 |
| 28 | 1  | 0 | 0.497118  | -2.392342 | -5.471075 |
| 29 | 6  | 0 | 4.030837  | -2.233406 | 0.185874  |
| 30 | 1  | 0 | 4.475186  | -1.951188 | 1.144795  |
| 31 | 1  | 0 | 3.615448  | -3.243390 | 0.272580  |
| 32 | 1  | 0 | 4.840569  | -2.255367 | -0.550333 |
| 33 | 6  | 0 | 1.286084  | -1.083701 | 0.958181  |
| 34 | 1  | 0 | 0.848527  | -2.086210 | 0.985980  |
| 35 | 1  | 0 | 1.655226  | -0.831512 | 1.956409  |
| 36 | 1  | 0 | 0.491813  | -0.372565 | 0.708029  |
| 37 | 6  | 0 | 3.708383  | 4.647872  | 3.077526  |
| 38 | 6  | 0 | 4.571738  | 4.040488  | 2.183282  |
| 39 | 6  | 0 | 4.077574  | 3.692058  | 0.898851  |
| 40 | 6  | 0 | 2.780143  | 4.176033  | 0.572191  |
| 41 | 6  | 0 | 2.027061  | 4.773854  | 1.559154  |
| 42 | 1  | 0 | 4.066637  | 4.871577  | 4.082496  |
| 43 | 1  | 0 | 5.584361  | 3.784071  | 2.468647  |
| 44 | 1  | 0 | 2.380435  | 4.033640  | -0.426050 |
| 45 | 1  | 0 | 1.015279  | 5.106241  | 1.327098  |
| 46 | 6  | 0 | 4.981269  | 3.298310  | -0.144087 |
| 47 | 7  | 0 | 5.707846  | 3.006173  | -1.003146 |
| 48 | 7  | 0 | 2.444595  | 5.014104  | 2.817059  |

---

**IM3**

M06-2X/6-311G(d,p) Electronic Energy: -1250.7862207 a.u.

M06-2X/6-311G(d,p) Gibbs free Energy: -1250.449907 a.u.

M06-2X/cc-pVTZ Electronic Energy: -1251.2389446 a.u.

| Center<br>Number | Atomic<br>Number | Atomic<br>Type | Coordinates (Angstroms) |           |           |
|------------------|------------------|----------------|-------------------------|-----------|-----------|
|                  |                  |                | X                       | Y         | Z         |
| 1                | 6                | 0              | 6.989643                | -0.207683 | 3.192504  |
| 2                | 6                | 0              | 7.156211                | 0.056748  | 1.834275  |
| 3                | 6                | 0              | 6.141093                | 0.669353  | 1.106241  |
| 4                | 6                | 0              | 4.932903                | 1.030030  | 1.718544  |
| 5                | 6                | 0              | 4.791389                | 0.782270  | 3.089065  |
| 6                | 6                | 0              | 5.803660                | 0.164191  | 3.819349  |
| 7                | 1                | 0              | 7.780290                | -0.692771 | 3.757551  |
| 8                | 1                | 0              | 8.082574                | -0.216725 | 1.337219  |
| 9                | 1                | 0              | 6.289723                | 0.878241  | 0.051147  |
| 10               | 1                | 0              | 3.871943                | 1.091277  | 3.579314  |
| 11               | 1                | 0              | 5.665914                | -0.023353 | 4.880519  |
| 12               | 6                | 0              | 3.817124                | 1.697986  | 0.954916  |
| 13               | 6                | 0              | 3.491296                | 0.997787  | -0.372070 |
| 14               | 1                | 0              | 2.920452                | 1.681130  | 1.585694  |
| 15               | 1                | 0              | 2.669018                | 1.552817  | -0.844797 |
| 16               | 1                | 0              | 4.337989                | 1.062444  | -1.069049 |
| 17               | 14               | 0              | 2.938018                | -0.791116 | -0.175757 |
| 18               | 6                | 0              | 2.053471                | -1.320403 | -1.768394 |
| 19               | 6                | 0              | 0.925024                | -0.613970 | -2.213343 |
| 20               | 6                | 0              | 2.480640                | -2.406133 | -2.543659 |
| 21               | 6                | 0              | 0.250369                | -0.976333 | -3.375336 |
| 22               | 1                | 0              | 0.567027                | 0.240651  | -1.641806 |
| 23               | 6                | 0              | 1.813380                | -2.776283 | -3.710360 |
| 24               | 1                | 0              | 3.354695                | -2.974691 | -2.234231 |
| 25               | 6                | 0              | 0.694707                | -2.061848 | -4.127760 |
| 26               | 1                | 0              | -0.619578               | -0.411164 | -3.696951 |
| 27               | 1                | 0              | 2.167877                | -3.621173 | -4.294130 |
| 28               | 1                | 0              | 0.172340                | -2.346356 | -5.036569 |
| 29               | 6                | 0              | 4.340196                | -2.010958 | 0.142469  |
| 30               | 1                | 0              | 4.785860                | -1.821592 | 1.123191  |
| 31               | 1                | 0              | 3.970166                | -3.042033 | 0.125013  |
| 32               | 1                | 0              | 5.137048                | -1.918167 | -0.602361 |
| 33               | 6                | 0              | 1.703178                | -0.904069 | 1.244828  |
| 34               | 1                | 0              | 1.267656                | -1.905336 | 1.314181  |
| 35               | 1                | 0              | 2.204587                | -0.679556 | 2.192058  |
| 36               | 1                | 0              | 0.889412                | -0.182664 | 1.121202  |
| 37               | 6                | 0              | 3.275533                | 4.592260  | 2.755378  |
| 38               | 6                | 0              | 4.289057                | 3.935454  | 2.120291  |
| 39               | 6                | 0              | 4.050659                | 3.277694  | 0.783193  |
| 40               | 6                | 0              | 2.846282                | 3.946953  | 0.164099  |
| 41               | 6                | 0              | 1.943412                | 4.606879  | 0.949936  |

---

|    |   |   |          |          |           |
|----|---|---|----------|----------|-----------|
| 42 | 1 | 0 | 3.470711 | 4.946298 | 3.772364  |
| 43 | 1 | 0 | 5.248059 | 3.788499 | 2.606882  |
| 44 | 1 | 0 | 2.684108 | 3.851419 | -0.904873 |
| 45 | 1 | 0 | 1.035390 | 4.976556 | 0.462689  |
| 46 | 6 | 0 | 5.229006 | 3.426476 | -0.110908 |
| 47 | 7 | 0 | 6.136990 | 3.512460 | -0.826938 |
| 48 | 7 | 0 | 2.049514 | 4.906870 | 2.265380  |

---

**TS4**

M06-2X/6-311G(d,p) Electronic Energy: -1250.7681439 a.u.

M06-2X/6-311G(d,p) Gibbs free Energy: -1250.433287 a.u.

M06-2X/cc-pVTZ Electronic Energy: -1251.2223953 a.u.

---

| Center<br>Number | Atomic<br>Number | Atomic<br>Type | Coordinates (Angstroms) |           |           |
|------------------|------------------|----------------|-------------------------|-----------|-----------|
|                  |                  |                | X                       | Y         | Z         |
| 1                | 6                | 0              | 6.837933                | -0.377459 | 3.108373  |
| 2                | 6                | 0              | 7.043757                | 0.155902  | 1.837252  |
| 3                | 6                | 0              | 6.026987                | 0.843282  | 1.180759  |
| 4                | 6                | 0              | 4.776858                | 1.017946  | 1.790240  |
| 5                | 6                | 0              | 4.592488                | 0.497559  | 3.075196  |
| 6                | 6                | 0              | 5.606063                | -0.199136 | 3.730260  |
| 7                | 1                | 0              | 7.632550                | -0.921195 | 3.611125  |
| 8                | 1                | 0              | 8.005173                | 0.032362  | 1.347116  |
| 9                | 1                | 0              | 6.201869                | 1.263383  | 0.195670  |
| 10               | 1                | 0              | 3.633805                | 0.645597  | 3.567311  |
| 11               | 1                | 0              | 5.432039                | -0.598561 | 4.725416  |
| 12               | 6                | 0              | 3.614950                | 1.694936  | 1.084549  |
| 13               | 6                | 0              | 3.300637                | 1.002152  | -0.252786 |
| 14               | 1                | 0              | 2.741434                | 1.555122  | 1.738024  |
| 15               | 1                | 0              | 2.412259                | 1.467334  | -0.700283 |
| 16               | 1                | 0              | 4.117195                | 1.184616  | -0.962231 |
| 17               | 14               | 0              | 2.936743                | -0.842490 | -0.125388 |
| 18               | 6                | 0              | 2.111643                | -1.376660 | -1.747870 |
| 19               | 6                | 0              | 0.887118                | -0.810315 | -2.134138 |
| 20               | 6                | 0              | 2.677388                | -2.331149 | -2.602796 |
| 21               | 6                | 0              | 0.253281                | -1.179668 | -3.316601 |
| 22               | 1                | 0              | 0.418843                | -0.059962 | -1.499248 |
| 23               | 6                | 0              | 2.051981                | -2.707481 | -3.790509 |
| 24               | 1                | 0              | 3.628683                | -2.788366 | -2.340518 |
| 25               | 6                | 0              | 0.836697                | -2.132604 | -4.149076 |
| 26               | 1                | 0              | -0.692860               | -0.722899 | -3.592069 |
| 27               | 1                | 0              | 2.515182                | -3.447342 | -4.437150 |
| 28               | 1                | 0              | 0.347261                | -2.421881 | -5.074500 |
| 29               | 6                | 0              | 4.446875                | -1.935479 | 0.148238  |
| 30               | 1                | 0              | 4.852367                | -1.779116 | 1.152601  |

---

|    |   |   |          |           |           |
|----|---|---|----------|-----------|-----------|
| 31 | 1 | 0 | 4.182295 | -2.993564 | 0.043603  |
| 32 | 1 | 0 | 5.244563 | -1.705531 | -0.564922 |
| 33 | 6 | 0 | 1.697754 | -1.155398 | 1.265502  |
| 34 | 1 | 0 | 1.366699 | -2.198284 | 1.270127  |
| 35 | 1 | 0 | 2.156623 | -0.937519 | 2.235035  |
| 36 | 1 | 0 | 0.814009 | -0.517677 | 1.161977  |
| 37 | 6 | 0 | 3.820420 | 5.170087  | 2.519064  |
| 38 | 6 | 0 | 4.243700 | 3.905295  | 2.179214  |
| 39 | 6 | 0 | 3.729988 | 3.239513  | 1.007746  |
| 40 | 6 | 0 | 2.597752 | 3.946596  | 0.459450  |
| 41 | 6 | 0 | 2.268958 | 5.208192  | 0.900408  |
| 42 | 1 | 0 | 4.282039 | 5.654395  | 3.382532  |
| 43 | 1 | 0 | 5.028689 | 3.430913  | 2.760319  |
| 44 | 1 | 0 | 2.045000 | 3.522691  | -0.373278 |
| 45 | 1 | 0 | 1.438243 | 5.724262  | 0.413684  |
| 46 | 6 | 0 | 5.152881 | 3.306810  | -0.403029 |
| 47 | 7 | 0 | 5.930134 | 3.563115  | -1.237333 |
| 48 | 7 | 0 | 2.849067 | 5.876045  | 1.913137  |

---

**P**  
M06-2X/6-311G(d,p) Electronic Energy: -1157.9739101 a.u.  
M06-2X/6-311G(d,p) Gibbs free Energy: -1157.641293 a.u.  
M06-2X/cc-pVTZ Electronic Energy: -1158.3140038 a.u.

---

| Center<br>Number | Atomic<br>Number | Atomic<br>Type | Coordinates (Angstroms) |           |           |
|------------------|------------------|----------------|-------------------------|-----------|-----------|
|                  |                  |                | X                       | Y         | Z         |
| 1                | 6                | 0              | 6.930162                | -0.169834 | 2.909111  |
| 2                | 6                | 0              | 6.964690                | 0.587948  | 1.738439  |
| 3                | 6                | 0              | 5.802708                | 1.173495  | 1.251285  |
| 4                | 6                | 0              | 4.585431                | 1.004843  | 1.918874  |
| 5                | 6                | 0              | 4.565164                | 0.265212  | 3.101031  |
| 6                | 6                | 0              | 5.729632                | -0.323135 | 3.594274  |
| 7                | 1                | 0              | 7.837152                | -0.629704 | 3.287539  |
| 8                | 1                | 0              | 7.901179                | 0.722176  | 1.206473  |
| 9                | 1                | 0              | 5.834116                | 1.770921  | 0.343107  |
| 10               | 1                | 0              | 3.627586                | 0.143944  | 3.638369  |
| 11               | 1                | 0              | 5.695357                | -0.900501 | 4.512687  |
| 12               | 6                | 0              | 3.308117                | 1.583991  | 1.331477  |
| 13               | 6                | 0              | 2.980286                | 0.933745  | -0.022462 |
| 14               | 1                | 0              | 2.494724                | 1.338245  | 2.028778  |
| 15               | 1                | 0              | 2.034122                | 1.341028  | -0.403849 |
| 16               | 1                | 0              | 3.745239                | 1.202811  | -0.763763 |
| 17               | 14               | 0              | 2.824026                | -0.958929 | -0.030508 |
| 18               | 6                | 0              | 2.001523                | -1.405866 | -1.667633 |
| 19               | 6                | 0              | 0.685487                | -0.997568 | -1.933637 |

---

|    |   |   |           |           |           |
|----|---|---|-----------|-----------|-----------|
| 20 | 6 | 0 | 2.668406  | -2.136481 | -2.659612 |
| 21 | 6 | 0 | 0.060023  | -1.303742 | -3.137994 |
| 22 | 1 | 0 | 0.133693  | -0.430335 | -1.185470 |
| 23 | 6 | 0 | 2.050468  | -2.446756 | -3.869565 |
| 24 | 1 | 0 | 3.688680  | -2.471562 | -2.488462 |
| 25 | 6 | 0 | 0.744701  | -2.030553 | -4.109950 |
| 26 | 1 | 0 | -0.959504 | -0.978077 | -3.320029 |
| 27 | 1 | 0 | 2.587792  | -3.013812 | -4.623511 |
| 28 | 1 | 0 | 0.260373  | -2.271592 | -5.051065 |
| 29 | 6 | 0 | 4.491823  | -1.820865 | 0.072470  |
| 30 | 1 | 0 | 4.946789  | -1.684968 | 1.058020  |
| 31 | 1 | 0 | 4.378355  | -2.895086 | -0.106055 |
| 32 | 1 | 0 | 5.191679  | -1.425280 | -0.670499 |
| 33 | 6 | 0 | 1.705957  | -1.501987 | 1.384880  |
| 34 | 1 | 0 | 1.493290  | -2.572419 | 1.313780  |
| 35 | 1 | 0 | 2.178928  | -1.317688 | 2.354043  |
| 36 | 1 | 0 | 0.749607  | -0.969700 | 1.368014  |
| 37 | 6 | 0 | 3.701814  | 5.199209  | 2.437037  |
| 38 | 6 | 0 | 3.629452  | 3.813792  | 2.471899  |
| 39 | 6 | 0 | 3.391483  | 3.106599  | 1.289388  |
| 40 | 6 | 0 | 3.246132  | 3.857017  | 0.126172  |
| 41 | 6 | 0 | 3.341558  | 5.247460  | 0.197917  |
| 42 | 1 | 0 | 3.883189  | 5.759513  | 3.351470  |
| 43 | 1 | 0 | 3.766716  | 3.282569  | 3.409729  |
| 44 | 1 | 0 | 3.057492  | 3.383238  | -0.830409 |
| 45 | 1 | 0 | 3.231403  | 5.843392  | -0.705768 |
| 46 | 7 | 0 | 3.563022  | 5.924724  | 1.322022  |

---

#### CN<sup>-</sup>

M06-2X/6-311G(d,p) Electronic Energy: -92.7921816 a.u.

M06-2X/6-311G(d,p) Gibbs free Energy: -92.806220 a.u.

M06-2X/cc-pVTZ Electronic Energy: -92.9592314 a.u.

---

| Center<br>Number | Atomic<br>Number | Atomic<br>Type | Coordinates (Angstroms) |          |           |
|------------------|------------------|----------------|-------------------------|----------|-----------|
|                  |                  |                | X                       | Y        | Z         |
| 1                | 6                | 0              | -0.931923               | 1.564165 | -0.267746 |
| 2                | 7                | 0              | -0.426633               | 2.625089 | -0.362294 |

---

## 6. Reference

[1] L. Gao, X. Liu, G. Li, S. Chen, J. Cao, G. Wang, S. Li, *Org. Lett.* 2022, 24, 5698–5703.

[2] (a) E. Bergamaschi, V. J. Mayerhofer, and C. J. Teskey, *ACS Catal.* 2022, 12, 14806–14811. (b) E. Georgiou, D. Spinnato, K. Chen, P. Melchiorre, and K. Muniz, *Chem. Sci.*, 2022, 13, 8060–8064.

- [3] (a) T. A. Boebel, J. F. Hartwig, *Organometallics* 2008, 27, 6013–6019; (b) R. Shishido, M. Uesugi, R. Takahashi, T. Mita, T. Ishiyama, K. Kubota, H. Ito, *J. Am. Chem. Soc.* 2020, 142, 14125–14133; (c) T. Takeuchi, R. Shishido, K. Kubota, H. Ito, *Chem. Sci.* 2021, 12, 11799–11804.
- [4] H. Guo, X. Chen, C. Zhao and W. He, *Chem. Commun.*, 2015, 51, 17410–17412.
- [5] M. Linnemannstçns, J. Schwabedissen, B. Neumann, H. G. Stammler, R. J. F. Berger and N. W. Mitzel, *Chem. Eur. J.* 2020, 26, 2169–2173.
- [6] W. Zheng, Y. Xu, H. Luo, Y. Feng, J. Zhang, and L. Lin, *Org. Lett.* 2022 24, 7145-7150.
- [7] Gaussian 16, Revision A.03, M. J. Frisch, G. W. Trucks, H. B. Schlegel, G. E. Scuseria, M. A. Robb, J. R. Cheeseman, G. Scalmani, V. Barone, G. A. Petersson, H. Nakatsuji, X. Li, M. Caricato, A. V. Marenich, J. Bloino, B. G. Janesko, R. Gomperts, B. Mennucci, H. P. Hratchian, J. V. Ortiz, A. F. Izmaylov, J. L. Sonnenberg, D. Williams-Young, F. Ding, F. Lipparini, F. Egidi, J. Goings, B. Peng, A. Petrone, T. Henderson, D. Ranasinghe, V. G. Zakrzewski, J. Gao, N. Rega, G. Zheng, W. Liang, M. Hada, M. Ehara, K. Toyota, R. Fukuda, J. Hasegawa, M. Ishida, T. Nakajima, Y. Honda, O. Kitao, H. Nakai, T. Vreven, K. Throssell, J. A. Montgomery, Jr., J. E. Peralta, F. Ogliaro, M. J. Bearpark, J. J. Heyd, E. N. Brothers, K. N. Kudin, V. N. Staroverov, T. A. Keith, R. Kobayashi, J. Normand, K. Raghavachari, A. P. Rendell, J. C. Burant, S. S. Iyengar, J. Tomasi, M. Cossi, J. M. Millam, M. Klene, C. Adamo, R. Cammi, J. W. Ochterski, R. L. Martin, K. Morokuma, O. Farkas, J. B. Foresman, and D. J. Fox, Gaussian, Inc., Wallingford CT, 2016.
- [8] a) Y. Zhao, N. E Schultz, D. G. Truhlar, *J. Chem. Theory. Comput.* 2006, 2, 364; b) Y. Zhao, D. G. Truhlar, *J. Chem. Phys.* 2006, 125, 194101; c) Y. Zhao, D. G. Truhlar, *J. Phys. Chem. A* 2006, 110, 13126.
- [9] J. Tomasi, M. Persico, *Chem. Rev.* 1994, 94, 2027.
- [10] CYLview, 1.0b ; C. Y. Legault, Université de Sherbrooke, 2009 (<http://www.cylview.org>)
